# Supplementary material for: miR-1 coordinately regulates lysosomal v-ATPase and biogenesis to impact proteotoxicity and muscle function during aging
Source: eLife. 2021 Jul 27;10:e66768. doi: 10.7554/eLife.66768 (PMC8315803; doi:10.7554/eLife.66768)
Supplement: Supplementary file 1. — (a) Life span and heat stress data. (b) Aggregate and behavior data. (c) CeleST data. (d) List of candidate genes with in silico predicted miR-1 binding sites using microRNA.org, TargetScanWorm, and PicTar. (e) RNAi motility screen. (f) Proteomic analysis of differentially regulated proteins in mir-1 vs. wild-type. (g) Microscopy data. (h) Primers. [file elife-66768-supp1.xlsx]

## Sheet: 1a ageings and heat stress
	Supplemental file 1a: Life span and heat stress data.
	Experiment	Genotype	Temperature [°C]	Mean life	Maximal life	Age in days at % mortality			p valueA	Dead worms/	Figure	Experiment
				span [days]	span [days]	50% [days]	75% [days]	90% [days]		total worms
	Life span	N2;Q35	20	13.17	27	10	18	21		96/120		2020_10_BG
		mir-1(gk276);Q35		13.14	28	11	17	20	0.8621	104/120
		mir-1(dh1111);Q35		18.48	27	20	22	25	2e-09	102/120
		N2;Q35	20	12.35	22	12	15	18		90/120		2020_13_BG
		mir-1(gk276);Q35		13.8	28	12	17	24	0.024	94/120
		mir-1(dh1111);Q35		17.47	27	19	21	23	0	94/120
		N2		20.32	31	20	25	27	0	78/120
		N2;Q35	20	13.41	26	11	17	21		96/120	1J	2020_15_BG
		mir-1(gk276);Q35		15.09	28	14	21	24	0.0273	84/120
		mir-1(dh1111);Q35		19.48	28	20	23	25	0	91/120
	Life span	N2;Q35	25	7.87	17	6	9	12		96/120		2020_11_BG
		mir-1(gk276);Q35		7.85	18	6	8	13	0.7859	82/120
		mir-1(dh1111);Q35		9.51	22	8	13	15	0.0051	85/120
		N2;Q35	25	7.81	18	7	8	12		95/120		2020_12_BG
		mir-1(gk276);Q35		9.45	22	7	14	18	0.0135	86/120
		mir-1(dh1111);Q35		11.29	22	11	15	17	6e-08	78/120
		N2;Q35	25	8.76	17	10	10	12		84/120		2020_14_BG
		mir-1(gk276);Q35		11.2	24	11	15	17	2.1e-06	87/120
		mir-1(dh1111);Q35		13.73	26	15	17	19	0	84/120
	Life span	mir-1(gk276);Q35B	20	14.06	21	14	17	19		83/100		2020_33_BG
		mir-1(gk276);Q35 mir-1 transgene		9.85	19	10	12	13	0	70/100
		mir-1(gk276);Q35B	20	16.75	24	17	18	22		66/80		2020_34_BG
		mir-1(gk276);Q35 mir-1 transgene		13.74	17	13	17	17	7.3e-09	68/80
		mir-1(gk276);Q35B	20	15.61	23	14	17	21		55/95		2020_35_BG
		mir-1(gk276);Q35 mir-1 transgene		14.31	21	14	16	16	0.0216	42/80
		mir-1(gk276);Q35B	20	15.42	24	15	17	20		64/80	1O	2020_36_BG
		mir-1(gk276);Q35 mir-1 transgene		11.66	15	13	13	15	7.6e-09	30/40
		mir-1(gk276);Q35B	20	17.35	23	17	19	21		110/135		2020_37_BG
		mir-1(gk276);Q35 mir-1 transgene		13.05	21	13	15	17	0	83/110
	Life span	N2	20	21.14	33	22	24	27		141/240		2020_06_BG
		mir-1(gk276)		18.67	27	19	21	22	2.6e-06	61/120
		mir-1(dh1111)		19.3	33	19	22	25	0.0121	50/120
		N2	20	19.04	29	20	22	24		75/120	1-fs1D	2020_20_BG
		mir-1(gk276)		18.42	25	19	21	23	0.2517	65/120
		mir-1(dh1111)		19.24	29	19	21	23	0.7131	83/120
		N2	20	20.19	30	21	24	26		81/120		2020_29_BG
		mir-1(gk276)		19.22	27	20	22	23	0.0092	69/120
		mir-1(dh1111)		18.57	26	20	21	24	0.0019	77/120
	Life span	N2	20 to 25C	12.75	22	14	15	18		86/120		2020_27_BG
		mir-1(gk276)		11.9	21	11	15	18	0.2445	95/120
		mir-1(dh1111)		12.03	23	13	15	18	0.3194	80/120
		N2	25	13.66	23	14	16	18		132/240		2020_04_BG
		mir-1(gk276)		14.33	24	15	17	20	0.0891	61/120
		mir-1(dh1111)		14.43	28	14	17	20	0.0795	63/120
		N2	25	13.73	23	14	16	20		115/240		2020_05_BG
		mir-1(gk276)		12.91	28	12	16	18	0.2271	63/120
		mir-1(dh1111)		12.11	23	12	15	19	0.0177	75/120
		N2	25	11.57	22	11	16	17		87/120	1-fs1E	2020_16_BG
		mir-1(gk276)		12.42	25	11	16	19	0.17	68/120
		mir-1(dh1111)		12.05	26	12	15	18	0.352	139/240
	Heat stress	N2	35	5.97	8	6	6	6		75/75		2020_6a_BG
	survival	mir-1(gk276)		6.14	8	6	6	8	0.2	74/75
		mir-1(dh1111)		5.89	8	6	6	6	0.4685	73/75
		N2	35	6.36	9	6	7	8		65/75		2020_6b_BG
		mir-1(gk276)		7.01	10	7	8	9	0.0029	68/75
		mir-1(dh1111)		6.16	9	6	7	7	0.1694	68/75
		N2	35	7.14	9	7	8	9		69/75	1-fs1H	2020_9_BG
		mir-1(gk276)		7.43	10	7	8	9	0.1943	64/75
		mir-1(dh1111)		6.97	9	7	7	8	0.1736	70/75
	Life span	mir-1(gk276);Q35 on luciferase RNAi	20	19.53	33	16	26	30		110/120		201104_KK
	RNAi	mir-1(gk276);Q35 on vha-13 RNAi		15.32	21	14	16	19	1.3e-08	103/120
		mir-1(gk276);Q35 on luciferase RNAi	20	17.56	32	15	22	27		110/120	2I	201105_KK
		mir-1(gk276);Q35 on vha-13 RNAi		14.96	25	15	18	18	8.765e-05	94/120
		mir-1(gk276);Q35 on luciferase RNAi	20	15.9	28	14	18	23		107/120		201109_KK
		mir-1(gk276);Q35 on vha-13 RNAi		15.06	18	16	16	18	0.0895	93/120
	Life span	Q35D	20	14.86	24	15	18	20		74/100		2020_19_BG
		Q35;myo-3p::vha-13 wt		16.69	23	17	19	21	0.0197	63/99
		Q35D	20	14.96	22	15	18	20		76/100	3-fs1G	2020_21_BG
		Q35;myo-3p::vha-13 wt		16.78	24	17	19	21	0.0017	82/100
		Q35D	20	15.66	22	17	18	22		88/120		2020_24_BG
		Q35;myo-3p::vha-13 wt		15.59	24	16	18	24	0.458	90/120
		Q35D	20	14.03	21	14	16	21		80/100		2020_25_BG
		Q35;myo-3p::vha-13 wt		14.52	23	15	18	23	0.1128	82/100
	A p value determined by log-rank test.
	B mir-1(gk276);Q35 control worms were non-transgenic segregants of the same strain (mir-1(gk276); rmIs132[unc-54p::Q35::YFP]; dhEx965[mir-1p::mir-1, myo-2p::mCherry]).
	C Worms were maintained at 20°C and transferred to 25°C at day 1 of adulthood.
	D Q35 control worms were non-transgenic segregants of the same strain (mir-1(gk276); dhEx1207[myo-3p::flag::HA::mCherry::vha-13cDNA::vha-13 3’UTR, myo-2p::GFP]).
	fs: figure supplement

## Sheet: 1b aggregates and behavior
	Supplemental file 1b: Aggregate and behavior data.
	Experiment	Genotype, condition	Days adulthood	MeanA	SEM	p valueB	Number of worms	Figure	Experiment name
		N2;Q35	4	52.92	1.565		24	1BC	2020_13_BG
	Q35 Aggregates	mir-1(gk276);Q35		41.12	2.496	0.0003	25
		mir-1(dh1111);Q35		38.92	1.824	<0.0001	25
		N2;Q35	4	48.48	1.842		25		2020_15_BG
		mir-1(gk276);Q35		37.19	1.652	<0.0001	25
		mir-1(dh1111);Q35		35.84	1.688	<0.0001	25
		N2;Q35	4	56.32	1.783		25		2020_17_BG
		mir-1(gk276);Q35		35	1.499	<0.0001	25
		mir-1(dh1111);Q35		32.32	1.378	<0.0001	25
	Q35 Aggregates day 4	N2;Q35	4	52.57	2.27		74(3)		2020_13_15_BG
	n=3	mir-1(gk276);Q35		37.77	1.79	0.0047	75(3)
		mir-1(dh1111);Q35		35.69	1.907	0.0024	75(3)
		N2;Q35	8	1.5	1.003		136		2020_10_BG
	Q35 Motility (circle test)	mir-1(gk276);Q35		39.6	4.754	<0.0001	188
		mir-1(dh1111);Q35		44.5	4.059	<0.0001	148
		N2;Q35	8	1.333	1.333		82		2020_13_BG
		mir-1(gk276);Q35		27.33	5.371	0.0213	81
		mir-1(dh1111);Q35		23.5	4.311	0.0103	95
		N2		88.17	3.005	<0.0001	94
		N2;Q35	8	3.5	1.586		75		2020_15_BG
		mir-1(gk276);Q35		31.83	6.29	0.0334	93
		mir-1(dh1111);Q35		27	5.785	0.0122	89
		N2;Q35	8	0	0		69		2020_17_BG
		mir-1(gk276);Q35		20.33	7.881	0.0596	53
		mir-1(dh1111);Q35		24	3.215	0.0314	70
		N2;Q35	8	6.667	6.667		45		200823_KK
		mir-1(gk276);Q35		32.33	3.93	0.0295	35
		N2;Q35	8	0	0		62		200908_KK
		mir-1(gk276);Q35		25.83	5.94	<0.0001	50
		N2;Q35	8	4	2.627		63		200921_KK
		mir-1(gk276);Q35		18	8.05	0.5994	58
		mir-1(dh1111);Q35		36	3.536	0.0132	59
		N2;Q35	8	2.967	1.1819		68		201002_KK
		mir-1(gk276);Q35		25.95	3.893	0.0118	59
		mir-1(dh1111);Q35		32.29	3.276	0.001	71
	Q35 Motility (circle test) day 8	N2;Q35	8	2.496	0.7984		600(8)	1D	2020_10_13_15_17_BG
	n=8 (gk276), n=6 (dh1111)	mir-1(gk276);Q35		27.65	2.447	<0.0001	617(8)		200823_200908_200921_201002_KK
		mir-1(dh1111);Q35		31.38	3.247	0.0004	461(6)
		N2;Q35	8	2.56	0.8852		25		2020_10_BG
	Q35 Body bending	mir-1(gk276);Q35		16.42	2.934	0.0002	26
		mir-1(dh1111);Q35		11.56	2.536	0.0215	25
		N2;Q35	8	1.88	0.6092		25		2020_13_BG
		mir-1(gk276);Q35		16.16	3.069	0.0009	25
		mir-1(dh1111);Q35		19.68	3.384	<0.0001	25
		N2;Q35	8	2.36	0.9289		25	1E	2020_15_BG
		mir-1(gk276);Q35		18.4	2.786	0.0001	25
		mir-1(dh1111);Q35		14.24	3.386	0.005	25
		N2;Q35	8	1.37	0.4983		27		2020_17_BG
		mir-1(gk276);Q35		12.24	2.549	0.0017	25
		mir-1(dh1111);Q35		13.64	2.805	0.0004	25
	Q35 Body bending day 8	N2;Q35	8	2.043	0.2657		102(4)		2020_10_13_15_17_BG
	n=4	mir-1(gk276);Q35		15.81	1.289	<0.0001	101(4)
		mir-1(dh1111);Q35		14.78	1.731	0.0001	100(4)
		N2;Q35	8	17.46	5.225		26		2020_10_BG
	Q35 Pumping	mir-1(gk276);Q35		66.54	8.775	<0.0001	28
		mir-1(dh1111);Q35		79.4	6.618	<0.0001	25
		N2;Q35	8	20.8	6.364		25		2020_13_BG
		mir-1(gk276);Q35		79.68	7.833	<0.0001	25
		mir-1(dh1111);Q35		100.2	6.671	<0.0001	25
		N2;Q35	8	13.32	4.815		25		2020_15_BG
		mir-1(gk276);Q35		32.04	6.884	0.1215	25
		mir-1(dh1111);Q35		50.08	7.869	0.0006	25
		N2;Q35	8	12.96	4.958		25	1I	2020_17_BG
		mir-1(gk276);Q35		60.08	8.832	<0.0001	25
		mir-1(dh1111);Q35		72.92	7.119	<0.0001	25
	Q35 pumping day 8	N2;Q35	8	16.14	1.86		101(4)		2020_10_13_15_17_BG
	n=4	mir-1(gk276);Q35		59.59	10.05	0.022	103(4)
		mir-1(dh1111);Q35		78.1	12.35	0.0027	100(4)
		mir-1(gk276);Q35C	4	30.12	2.81		26	1KL	2020_37_BG
	Q35 Aggregates	mir-1(gk276);Q35;mir-1 transgene		52.2	3.255	<0.0001	25
		mir-1(gk276);Q35C	4	30.44	1.074		25		2020_39_BG
		mir-1(gk276);Q35;mir-1 transgene		39.8	2.46	0.0002	25
		mir-1(gk276);Q35C	4	40.04	2.747		25		2020_41_BG
		mir-1(gk276);Q35;mir-1 transgene		61.52	4.034	<0.0001	25
	Q35 Aggregates day 4	mir-1(gk276);Q35C	4	33.53	3.255		76(3)		2020_37_39_41 BG
	n=3	mir-1(gk276);Q35;mir-1 transgene		51.17	6.291	0.0675	75(3)
		mir-1(gk276);Q35C	8	5.5	1.167		91		2020_33_BG
	Q35 Motility (circle test)	mir-1(gk276);Q35;mir-1 transgene		2.012	1.167	0.0921	65
		mir-1(gk276);Q35C	8	10.4	2.135		96		2020_34_BG
		mir-1(gk276);Q35;mir-1 transgene		4.8	2.245	0.1083	84
		mir-1(gk276);Q35C	8	18.17	4.175		96		2020_35_BG
		mir-1(gk276);Q35;mir-1 transgene		7.2	2.035	0.0546	84
		mir-1(gk276);Q35C	8	5.6	1.913		88		2020_36_BG
		mir-1(gk276);Q35;mir-1 transgene		2	2	0.2666	45
		mir-1(gk276);Q35C	8	16.33	2.028		118		2020_37_BG
		mir-1(gk276);Q35;mir-1 transgene		2.333	1.498	0.0002	74
		mir-1(gk276);Q35C	8	15.75	1.887		65		2020_39_BG
		mir-1(gk276);Q35;mir-1 transgene		13.25	1.887	0.3851	40
		mir-1(gk276);Q35C	8	17.4	2.482		92		2020_41_BG
		mir-1(gk276);Q35;mir-1 transgene		4.8	3.2	0.0144	77
	Q35 Motility (circle test) day 8	mir-1(gk276);Q35C	8	12.74	2.082		646(7)	1M	2020_33_34_35_36_37_BG
	n=7	mir-1(gk276);Q35;mir-1 transgene		5.199	1.526	0.0128	469(7)
		mir-1(gk276);Q35C	8	21.34	5.94		29		2020_33_BG
	Q35 Pumping	mir-1(gk276);Q35;mir-1 transgene		7.04	3.1	0.0467	25
		mir-1(gk276);Q35C	8	40.62	7.782		26	1N	2020_34_BG
		mir-1(gk276);Q35;mir-1 transgene		13.38	4.915	0.0046	26
		mir-1(gk276);Q35C	8	36.84	8.564		25		2020_35_BG
		mir-1(gk276);Q35;mir-1 transgene		13.63	4.583	0.0183	27
		mir-1(gk276);Q35C	8	24.04	6.194		26		2020_36_BG
		mir-1(gk276);Q35;mir-1 transgene		9.84	5.073	0.0837	25
		mir-1(gk276);Q35C	8	43.08	7.653		25		2020_37_BG
		mir-1(gk276);Q35;mir-1 transgene		7.44	4.003	0.0001	25
		mir-1(gk276);Q35C	8	33.43	6.819		28		2020_39_BG
		mir-1(gk276);Q35;mir-1 transgene		17.03	5.615	0.0662	32
		mir-1(gk276);Q35C	8	22.54	5.993		26		2020_41_BG
		mir-1(gk276);Q35;mir-1 transgene		12.08	4.121	0.1636	24
	Q35 Pumping day 8	mir-1(gk276);Q35C	8	31.7	3.41		185(7)		2020_33_34_35_36_37_39_41_BG
	n=5	mir-1(gk276);Q35;mir-1 transgene		11.49	1.364	0.0001	184(7)
		N2	8	93.67	2.29		88		2020_20_BG
	Motility (circle test)	mir-1(gk276)		81.83	4.792	0.0804	87
		mir-1(dh1111)		94.5	3.181	0.9851	102
		N2	8	90.5	2.46		107		2020_29_BG
		mir-1(gk276)		83	1.528	0.2229	99
		mir-1(dh1111)		80.5	4.41	0.0834	111
		N2	8	93	4.427		92		2020_44_BG
		mir-1(gk276)		88.4	3.295	0.6312	90
		mir-1(dh1111)		94.6	2.462	0.944	95
	Motility (circle test) day 8	N2	8	92.39	0.9646		287(3)		2020_20_29_44_BG
	n=3	mir-1(gk276)		84.41	2.023	0.2237	276(3)
		mir-1(dh1111)		89.87	4.683	0.8277	308(3)
		N2	14	43	2.62		65	1-fs1F	2020_20_BG
	Motility (circle test)	mir-1(gk276)		35.67	8.257	0.7342	59
		mir-1(dh1111)		46.5	8.111	0.9309	77
		N2	14	50.33	7.41		79		2020_29_BG
		mir-1(gk276)		41.5	5.789	0.6824	71
		mir-1(dh1111)		51.67	8.713	0.9911	72
		N2	14	45.25	2.926		47		2020_44_BG
		mir-1(gk276)		39.25	11.64	0.8665	42
		mir-1(dh1111)		50	7.757	0.9136	55
	Motility (circle test) day 14	N2	14	46.19	2.168		191(3)		2020_20_29_44_BG
	n=3	mir-1(gk276)		38.81	1.698	0.0636	172(3)
		mir-1(dh1111)		49.39	1.523	0.4729	204(3)
		N2	14	20.88	4.911		25	1-fs1G	2020_20_BG
	Body bending	mir-1(gk276)		35.43	5.771	0.1356	21
		mir-1(dh1111)		37.52	5.474	0.0754	21
		N2	14	22.32	7.324		19		2020_29_BG
		mir-1(gk276)		18	4.112	0.8449	26
		mir-1(dh1111)		20.5	6.621	0.9783	14
		N2	14	24.2	4.878		25		2020_44_BG
		mir-1(gk276)		30.84	5.776	0.6423	25
		mir-1(dh1111)		32.52	4.956	0.5006	25
	Body bending day 14	N2	14	22.47	0.9612		69(3)		2020_20_29_44_BG
	n=3	mir-1(gk276)		28.09	5.216	0.6371	72(3)
		mir-1(dh1111)		30.18	5.051	0.4503	60(3)
		N2	8	77.16	8.247		25		2020_20_BG
	Pumping	mir-1(gk276)		85.28	7.563	0.762	25
		mir-1(dh1111)		81.68	8.628	0.919	25
		N2	8	87.33	6.799		24		2020_29_BG
		mir-1(gk276)		92.28	7.301	0.8874	25
		mir-1(dh1111)		84	8.21	0.9471	25
		N2	8	83.96	6.965		25		2020_44_BG
		mir-1(gk276)		68.2	8.965	0.406	25
		mir-1(dh1111)		68.04	9.765	0.3987	25
	Pumping day 8	N2	8	85.08	1.123		74(3)		2020_20_29_44_BG
	n=3	mir-1(gk276)		76.23	8.027	0.5382	75(3)
		mir-1(dh1111)		73.36	5.32	0.3634	75(3)
		N2	14	7.4	4.641		25		2020_20_BG
	Pumping	mir-1(gk276)		13.62	4.564	0.6061	26
		mir-1(dh1111)		10.27	4.524	0.8981	26
		N2	14	13.88	3.765		34		2020_29_BG
		mir-1(gk276)		14.26	4.255	0.998	27
		mir-1(dh1111)		22.23	5.706	0.3901	26
		N2	14	9.115	3.7		26		2020_44_BG
		mir-1(gk276)		8.4	4.399	0.9917	25
		mir-1(dh1111)		9.96	4.311	0.9885	25
	Pumping day 14	N2	14	10.14	1.938		85(3)		2020_20_29_44_BG
	n=3	mir-1(gk276)		12.09	1.856	0.8716	78(3)
		mir-1(dh1111)		14.14	4.039	0.5947	77(3)
		N2;Q40	0 (L4 stage)	25.1	1.291		49		2021_1_BG
	Q40 Aggregates	mir-1(gk276);Q40		2.92	0.6081	<0.0001	25
		N2;Q40	0 (L4 stage)	19.08	0.9797		25		2021_2_BG
		mir-1(gk276);Q40		0.84	0.1701	<0.0001	25
		N2;Q40	0 (L4 stage)	21.68	1.095		25		2021_3_BG
		mir-1(gk276);Q40		0.92	0.1724	<0.0001	25
	Q40 Aggregates L4	N2;Q35	0 (L4 stage)	21.95	1.743		99(3)		2021_1_2_3 BG
	n=3	mir-1(gk276);Q40		1.56	0.6804	0.0004	75(3)
		N2;Q40	3	147.2	3.7		25		2021_1_BG
	Q40 Body bending	mir-1(gk276);Q40		137.5	3.289	0.0564	25
		N2;Q40	3	143.1	8.001		25		2021_2_BG
		mir-1(gk276);Q40		134.6	6.941	0.4273	25
		N2;Q40	3	133.2	6.649		25		2021_3_BG
		mir-1(gk276);Q40		133.8	3.955	0.9358	24
	Body bending day 3	N2;Q40	3	141.2	4.155		75(3)		2021_1_2_3_BG
	n=3	mir-1(gk276);Q40		135.3	1.124	0.2446	74(3)
		N2;Q40	7	76.62	11,47		39		2021_1_BG
	Q40 Body bending	mir-1(gk276);Q40		76.06	11.5	0.9729	34
		N2;Q40	7	104.9	11.56		31		2021_2_BG
		mir-1(gk276);Q40		67	9.345	0.0126	34
		N2;Q40	7	91.12	12.75		25		2021_3_BG
		mir-1(gk276);Q40		46.14	10.54	0.0085	28
	Body bending day 7	N2;Q40	7	90.88	8.165		95(3)		2021_1_2_3_BG
	n=3	mir-1(gk276);Q40		63.07	8.858	0.0821	96(3)
		N2;α-syn	1	6.76	0.7838		25		210426_KK
	α-syn Aggregates	mir-1(gk276);α-syn		3.476	0.3756	0.0009	21
		N2;α-syn	1	7.6	0.466		15		210430_KK
		mir-1(gk276);α-syn		3.933	0.2482	<0.0001	15
		N2;α-syn	1	18.25	2.259		16		210503_KK
		mir-1(gk276);α-syn		5.467	0.6239	<0.0001	15
	Aggregates day 1	N2;α-syn	1	10.87	3.698		56(3)		210426_210430_210503_KK
	n=3	mir-1(gk276);α-syn		4.292	0.6021	0.154	51(3)
		N2;α-syn	1	71.63	3.334		16	1-fs1O	210419_KK
	α-syn Body bending	mir-1(gk276);α-syn		40.31	1.741	<0.0001	16
		N2;α-syn	1	70.93	2.623		15		210426_KK
		mir-1(gk276);α-syn		38.8	1.947	<0.0001	15
		N2;α-syn	1	74.73	3.243		15		210430_KK
		mir-1(gk276);α-syn		53.87	3.379	0.0001	15
	Body bending day 1	N2;α-syn	1	72.43	1.168		46(3)		210419_210426_210430_KK
	n=3	mir-1(gk276);α-syn		44.33	4.792	0.0047	46(3)
		N2;α-syn	5	32.87	5.447		15	1-fs1O	210504_KK
	α-syn Body bending	mir-1(gk276);α-syn		20.47	4.92	0.1022	15
		N2;α-syn	5	27.47	3.651		15		210507_KK
		mir-1(gk276);α-syn		28.73	4.442	0.8272	15
		N2;α-syn	5	37.07	2.314		15		210510_KK
		mir-1(gk276);α-syn		34.4	3.245	0.509	15
	Body bending day 5	N2;α-syn	5	32.47	2.778		45(3)		210504_210507_210510_KK
	n=3	mir-1(gk276);α-syn		27.87	4.044	0.4013	45(3)
		mir-1(gk276);Q35 on luci	8	21.54	2.878		64		201102_KK
	Q35 Motility (circle test)	mir-1(gk276);Q35 on vha-13i		0	0	<0.0001	55
		mir-1(gk276);Q35 on vha-5i		12.31	1.884	0.0419	63
		mir-1(gk276);Q35 on hlh-30i		9.231	2.878	0.0045	50
		mir-1(gk276);Q35 on daf-16i		6.154	1.884	0.0004	57
		mir-1(gk276);Q35 on luci	8	22.48	3.974		57		201110_KK
		mir-1(gk276);Q35 on vha-13i		4.744	1.94	0.0116	61
		mir-1(gk276);Q35 on vha-5i		16.42	5.455	0.7198	56
		mir-1(gk276);Q35 on hlh-30i		13.89	2.152	0.08597	58
		mir-1(gk276);Q35 on daf-16i		3.357	2.067	0.1913	57
		mir-1(gk276);Q35 on luci	8	26.66	5.233		64		201114 _KK
		mir-1(gk276);Q35 on vha-13i		0	0	0.0011	61
		mir-1(gk276);Q35 on vha-5i		15.35	4.841	0.2968	49
		mir-1(gk276);Q35 on hlh-30i		9.396	0.4727	0.0427	61
		mir-1(gk276);Q35 on daf-16i		7.172	2.443	0.0184	71
		mir-1(gk276);Q35 on luci	8	12.227	3.46		67		201122 _KK
		mir-1(gk276);Q35 on vha-13i		0	0	0.0462	66
		mir-1(gk276);Q35 on vha-5i		20.85	4.132	0.2156	59
		mir-1(gk276);Q35 on hlh-30i		11.82	4.222	0.9999	59
		mir-1(gk276);Q35 on daf-16i		5.317	2.264	0.3795	63
	Q35 Motility (circle test) day 8	mir-1(gk276);Q35 on luci	8	20.73	3.044		252(4)	2F	201102_201110_201114_201122_KK
	n=4	mir-1(gk276);Q35 on vha-13i		1.186	1.186	<0.0001	243(4)
		mir-1(gk276);Q35 on vha-5i		16.23	1.768	0.4117	227(4)
		mir-1(gk276);Q35 on hlh-30i		11.08	1.107	0.0116	228(4)
		mir-1(gk276);Q35 on daf-16i		5.5	0.8088	0.0002	248(4)
		mir-1(gk276);Q35 on luci	8	8.349	1.64		63	2G	201102_KK
	Q35 Body bending	mir-1(gk276);Q35 on vha-13i		0	0	<0.0001	54
		mir-1(gk276);Q35 on vha-5i		2.95	1.032	0.0053	60
		mir-1(gk276);Q35 on hlh-30i		3.804	0.8736	0.0431	51
		mir-1(gk276);Q35 on daf-16i		4.707	1.186	0.3612	58
		mir-1(gk276);Q35 on luci	8	10.13	2.055		53		201110_KK
		mir-1(gk276);Q35 on vha-13i		0.6833	0.2249	<0.0001	60
		mir-1(gk276);Q35 on vha-5i		6.075	1.129	0.1697	53
		mir-1(gk276);Q35 on hlh-30i		3.707	0.7597	0.0032	58
		mir-1(gk276);Q35 on daf-16i		6.255	1.497	0.1994	55
		mir-1(gk276);Q35 on luci	8	7.158	1.322		57		201114 _KK
		mir-1(gk276);Q35 on vha-13i		0	0	<0.0001	63
		mir-1(gk276);Q35 on vha-5i		6.592	1.285	0.9967	49
		mir-1(gk276);Q35 on hlh-30i		5.286	1.185	0.748	56
		mir-1(gk276);Q35 on daf-16i		6.441	1.131	0.9888	68
		mir-1(gk276);Q35 on luci	8	5.203	1.243		59		201122 _KK
		mir-1(gk276);Q35 on vha-13i		0.04839	0.03583	0.0325	62
		mir-1(gk276);Q35 on vha-5i		10.51	1.653	0.0329	55
		mir-1(gk276);Q35 on hlh-30i		7.125	1.373	0.8298	56
		mir-1(gk276);Q35 on daf-16i		11.32	1.54	0.0068	59
	Q35 Body bending day 8	mir-1(gk276);Q35 on luci	8	7.71	1.035		232(4)		201102_201110_201114_201122_KK
	n=4	mir-1(gk276);Q35 on vha-13i		0.1829	0.1672	0.0019	239(4)
		mir-1(gk276);Q35 on vha-5i		6.532	1.551	0.9414	217(4)
		mir-1(gk276);Q35 on hlh-30i		4.981	0.8009	0.4446	221(4)
		mir-1(gk276);Q35 on daf-16i		7.181	1.433	0.9969	240(4)
		mir-1(gk276);Q35 on luci	8	48.07	11.38		29		201110_KK
	Q35 Pumping	mir-1(gk276);Q35 on vha-13i		22.32	6.809	0.3266	37
		mir-1(gk276);Q35 on vha-5i		46.23	10.81	>0.9999	30
		mir-1(gk276);Q35 on hlh-30i		41.09	8.627	0.9873	33
		mir-1(gk276);Q35 on daf-16i		56.33	10.92	0.9762	33
		mir-1(gk276);Q35 on luci	8	42.79	8.809		34	2H	201114 _KK
		mir-1(gk276);Q35 on vha-13i		5.088	2.066	0.0031	34
		mir-1(gk276);Q35 on vha-5i		35.9	7.768	0.967	30
		mir-1(gk276);Q35 on hlh-30i		26.55	8.062	0.5393	31
		mir-1(gk276);Q35 on daf-16i		51.41	7.558	0.9061	41
		mir-1(gk276);Q35 on luci	8	31.9	5.058		40		201122_KK
		mir-1(gk276);Q35 on vha-13i		5.03	2.296	0.0002	33
		mir-1(gk276);Q35 on vha-5i		47.21	5.239	0.0639	34
		mir-1(gk276);Q35 on hlh-30i		24.66	4.441	0.6489	32
		mir-1(gk276);Q35 on daf-16i		49.5	5.174	0.0223	35
	Q35 Pumping day 8	mir-1(gk276);Q35 on luci	8	38.67	4.052		103(3)		201110_201114_201122_KK
	n=5	mir-1(gk276);Q35 on vha-13i		9.367	4.318	0.0002	104(3)
		mir-1(gk276);Q35 on vha-5i		41.31	3.13	0.9824	94(3)
		mir-1(gk276);Q35 on hlh-30i		29.71	3.819	0.4068	96(3)
		mir-1(gk276);Q35 on daf-16i		52.16	1.46	0.0977	109(3)
		N2;Q35 on luci	5	43.6	8.249		71	2-fs1F	201206_KK
	Q35 Motility(circle test)	N2;Q35 on vha-5i		41.82	8.833	0.8868	67
		N2;Q35 on luci	5	33.72	3.607		63		201215_KK
		N2;Q35 on vha-5i		23.86	3.205	0.0751	68
		N2;Q35 on luci	5	35.6	6.699		68	2-fs1F	201216_KK
		N2;Q35 on vha-10i		17.71	5.073	0.0658	67
		N2;Q35 on luci	5	73.86	5.122		66		201212_KK
		N2;Q35 on vha-10i		42.07	7.417	0.0078	68
		N2;Q35 on luci	5	38.9	5.5		71	2-fs1F	201206_KK
		N2;Q35 on vha-13i		27.86	6.81	0.2426	66
		N2;Q35 on luci	5	38.73	3.67		59		201215_KK
		N2;Q35 on vha-13i		18.06	5.805	0.0168	56
		N2;Q35 on luci	5	51.03	4.912		67	2-fs1F	201216_KK
		N2;Q35 on vha-19i		13.3	4.307	0.0004	66
		N2;Q35 on luci	5	38.68	2.209		67		201218_KK
		N2;Q35 on vha-19i		32.95	4.752	0.3058	61
		N2;Q35 on luci	5	67.18	4.471		67	2-fs1F	201206_KK
		N2;Q35 on daf-16i		16.17	4.031	<0.0001	67
		N2;Q35 on luci	5	35.24	7.303		67		201215_KK
		N2;Q35 on daf-16i		4.913	2.03	0.0039	65
		N2;Q35 on luci	5	45.07	5.668		67	2-fs1F	201206_KK
		N2;Q35 on hlh-30i		61.14	6.869	0.1088	68
		N2;Q35 on luci	5	40.55	26.62		65		201215_KK
		N2;Q35 on hlh-30i		7.999	7.266	0.2335	61
		Q35D	4	55.88	3.981		74		2020_19_BG
	Q35 Aggregates	Q35; myo-3p::vha-13 wt		40.4	2.562	0.0029	26
		Q35D	4	62.83	1.338		23	3J	2020_21_BG
		Q35; myo-3p::vha-13 wt		45.16	2.335	<0.0001	25
		Q35D	4	70.96	2.418		25		2020_24_BG
		Q35; myo-3p::vha-13 wt		43.48	2.358	<0.0001	25
		Q35D	4	69.92	3.239		24		2020_25_BG
		Q35; myo-3p::vha-13 wt		50.52	3.302	<0.0001	25
	Q35 Aggregates	Q35D	4	64.9	3.507		96(4)		2020_19_21_24_25_BG
	n=4	Q35 myo-3p::vha-13 wt		44.89	2.12	0.0028	101(4)
		Q35D	8	22.2	1.655		81		2020_19_BG
	Q35 Motility (circle test)	Q35; myo-3p::vha-13 wt		44.4	3.341	0.0003	79
		Q35D	8	9.4	1.913		85		2020_21_BG
		Q35; myo-3p::vha-13 wt		44.8	5.607	0.0003	76
		Q35D	8	4.833	2.372		91		2020_24_BG
		Q35; myo-3p::vha-13 wt		41.33	7.182	0.0007	98
		Q35D	8	7	3.661		77		2020_25_BG
		Q35; myo-3p::vha-13 wt		19.2	1.497	0.015	78
	Q35 Motility (circle test) day 8	Q35D	8	12.74	3.725		334(4)	3K	2020_19_21_24_25_BG
	n=4	Q35 myp-3p::vha-13 wt		40.25	3.353	0.0122	331(4)
		Q35D	8	5.68	1.511		25		2020_21_BG
	Q35 Body bending	Q35; myo-3p::vha-13 wt		20.96	4.911	0.0046	25
		Q35D	8	8.348	2.774		23	3-fs1F	2020_24_BG
		Q35; myo-3p::vha-13 wt		31.56	4.725	0.0001	25
		Q35D	8	8.6	2.601		25		2020_25_BG
		Q35; myo-3p::vha-13 wt		31.88	5.057	0.0002	26
	Q35 Body bending day 8	Q35D	8	7.543	1.618		73(3)		2020_21_24_25_BG
	n=3	Q35; myo-3p::vha-13 wt		28.13	3.588	0.0051	76(3)
		Q35D	8	35.16	7.348		25		2020_19_BG
	Q35 Pumping	Q35; myo-3p::vha-13 wt		77.8	5.246	<0.0001	25
		Q35D	8	20.72	6.395		25	3L	2020_21_BG
		Q35; myo-3p::vha-13 wt		60.76	7.484	0.0002	25
		Q35D	8	19.76	5.282		25		2020_24_BG
		Q35; myo-3p::vha-13 wt		42.8	8.462	0.0252	25
		Q35D	8	14.56	3.959		27		2020_25_BG
		Q35; myo-3p::vha-13 wt		30.46	6.4	0.0379	26
	Q35 Pumping day 8	Q35D	8	22.55	4.4416		102(4)		2020_19_21_24_25_BG
	n=4	Q35; myo-3p::vha-13 wt		52.96	10.36	0.0356	101(4)
	A Mean number of aggregates, mean percent motile worms (circle test) after 30 minutes, mean number of body bends per 20-60 seconds, mean number of pumps per 20-30 seconds.
	B p value determined by t-test or One-way ANOVA.
	C mir-1(gk276);Q35 control worms were non-transgenic segregants of the same strain (mir-1(gk276); rmIs132[unc-54p::Q35::YFP]; dhEx965[mir-1p::mir-1, myo-2p::mCherry]).
	D Q35 control worms were non-transgenic segregants of the same strain (mir-1(gk276); dhEx1207[myo-3p::flag::HA::mCherry::vha-13cDNA::vha-13 3’UTR, myo-2p::GFP]).
	fs: figure supplement

## Sheet: 1c CeleST data
	Supplemental file 1c: CeleSt data.
	Gene	Age	Wave Init Rate	Body Wave Number	Asymmetry	Stretch	Curling	Travel Speed	Brush Stroke	Activity Index	Sample	Video	Worm	Author
	N2	Day 4 adult	92.0506	0.331576	0.010616	0.293899	0	13.7741	0.23631	324.583	Sample_WT_Day4_Series002_5	WT_Day4_Series002	1	JH
	N2	Day 4 adult	58.1296	0.186465	0.008046	0.451836	0	7.11897	0.230169	246.68	Sample_WT_Day4_Series002_5	WT_Day4_Series002	2	JH
	N2	Day 4 adult	53.6969	0.335512	-0.005835	0.473187	3.19291	6.52423	0.250007	221.638	Sample_WT_Day4_Series002_5	WT_Day4_Series002	3	JH
	N2	Day 4 adult	73.6326	0.240807	-0.01009	0.290879	0	7.94604	0.231228	270.686	Sample_WT_Day4_Series002_5	WT_Day4_Series002	4	JH
	N2	Day 4 adult	79.6249	0.254304	0.031556	0.4596	0.853081	12.0703	0.427992	392.432	Sample_WT_Day4_Series002_5	WT_Day4_Series002	5	JH
	N2	Day 4 adult	84.6222	0.336696	-0.010785	0.39035	0.491803	10.9054	0.337034	253.435	Sample_WT_Day4_Series003_5	WT_Day4_Series003	1	JH
	N2	Day 4 adult	60.4451	0.327441	-0.044988	0.393593	0	8.48669	0.230891	217.471	Sample_WT_Day4_Series003_5	WT_Day4_Series003	2	JH
	N2	Day 4 adult	56.3561	0.257967	-0.003995	0.511823	0.512821	10.7592	0.242602	243.682	Sample_WT_Day4_Series003_5	WT_Day4_Series003	3	JH
	N2	Day 4 adult	76.2654	0.467541	0.009399	0.348378	0.265487	6.50291	0.431397	395.413	Sample_WT_Day4_Series003_5	WT_Day4_Series003	4	JH
	N2	Day 4 adult	75.053	0.39399	-0.011885	0.344305	0	13.0046	0.454596	290.261	Sample_WT_Day4_Series003_5	WT_Day4_Series003	5	JH
	N2	Day 4 adult	81.7369	0.398774	-0.015928	0.384089	0.985626	12.4295	0.396732	285.811	Sample_WT_Day4_Series004_3	WT_Day4_Series004	1	JH
	N2	Day 4 adult	101.163	0.356617	0.003845	0.342444	0.247423	13.5726	0.459478	363.123	Sample_WT_Day4_Series004_3	WT_Day4_Series004	2	JH
	N2	Day 4 adult	60.4857	0.432025	0.000654	0.469996	0.744417	7.58504	0.29196	305.704	Sample_WT_Day4_Series004_3	WT_Day4_Series004	3	JH
	N2	Day 4 adult	73.2278	0.284229	0.0064	0.3453	0	13.0977	0.263302	267.733	Sample_WT_Day4_Series005_5	WT_Day4_Series005	1	JH
	N2	Day 4 adult	91.6631	0.24271	0.007189	0.314279	0	14.8593	0.306773	331.93	Sample_WT_Day4_Series005_5	WT_Day4_Series005	2	JH
	N2	Day 4 adult	90.6479	0.326789	0.009286	0.3624	0	10.9464	0.383927	337.497	Sample_WT_Day4_Series005_5	WT_Day4_Series005	3	JH
	N2	Day 4 adult	59.8992	0.176822	0.014353	0.400818	0.148515	4.67584	0.317447	166.231	Sample_WT_Day4_Series005_5	WT_Day4_Series005	4	JH
	N2	Day 4 adult	104.421	0.342513	-0.017856	0.364601	0	14.4508	0.45492	432.734	Sample_WT_Day4_Series005_5	WT_Day4_Series005	5	JH
	N2	Day 4 adult	83.7517	0.401945	-0.001428	0.321949	0	14.4669	0.368508	305.289	Sample_WT_Day4_Series007_5	WT_Day4_Series007	1	JH
	N2	Day 4 adult	72.7417	0.195459	-0.000961	0.355559	0	13.1738	0.400793	233.871	Sample_WT_Day4_Series007_5	WT_Day4_Series007	2	JH
	N2	Day 4 adult	55.6506	0.296375	-0.006052	0.540658	2.36515	8.155	0.278309	238.961	Sample_WT_Day4_Series007_5	WT_Day4_Series007	3	JH
	N2	Day 4 adult	77.8101	0.399229	-0.036873	0.405427	0	9.45384	0.222497	250.786	Sample_WT_Day4_Series007_5	WT_Day4_Series007	4	JH
	N2	Day 4 adult	90.7107	0.385698	-0.004595	0.295416	0.131291	11.7138	0.231989	319.65	Sample_WT_Day4_Series007_5	WT_Day4_Series007	5	JH
	N2	Day 4 adult	64.6443	0.236217	0.012696	0.374058	0	11.9313	0.264333	283.047	Sample_WT_Day4_Series008_5	WT_Day4_Series008	1	JH
	N2	Day 4 adult	92.5737	0.48775	-0.007668	0.347598	0	14.275	0.379527	361.325	Sample_WT_Day4_Series008_5	WT_Day4_Series008	2	JH
	N2	Day 4 adult	65.2658	0.370385	-0.002333	0.437418	0	11.4767	0.361877	294.054	Sample_WT_Day4_Series008_5	WT_Day4_Series008	3	JH
	N2	Day 4 adult	67.4237	0.28687	-0.005285	0.452277	0.660793	9.99596	0.311334	272.137	Sample_WT_Day4_Series008_5	WT_Day4_Series008	4	JH
	N2	Day 4 adult	37.832	0.131457	-0.015091	0.544187	0.282353	2.90575	0.303263	137.795	Sample_WT_Day4_Series008_5	WT_Day4_Series008	5	JH
	N2	Day 4 adult	76.4435	0.602159	0.036716	0.3088	0	5.66949	0.215743	202.708	Sample_WT_Day4_Series009_5	WT_Day4_Series009	1	JH
	N2	Day 4 adult	89.7296	0.426422	-0.015027	0.360976	0	9.96115	0.319071	331.225	Sample_WT_Day4_Series009_5	WT_Day4_Series009	2	JH
	N2	Day 4 adult	102.958	0.460839	-0.005124	0.368073	0.616016	12.0827	0.304041	400.338	Sample_WT_Day4_Series009_5	WT_Day4_Series009	3	JH
	N2	Day 4 adult	74.4168	0.319676	0.000542	0.411481	0.746888	10.6456	0.382551	262.978	Sample_WT_Day4_Series009_5	WT_Day4_Series009	4	JH
	N2	Day 4 adult	66.5425	0.183642	0.024346	0.349677	0.383795	9.49512	0.142812	247.314	Sample_WT_Day4_Series009_5	WT_Day4_Series009	5	JH
	N2	Day 4 adult	73.4537	0.374973	0.001757	0.393149	1.36082	9.00583	0.280968	228.678	Sample_WT_Day4_Series011_5	WT_Day4_Series011	1	JH
	N2	Day 4 adult	60.2897	0.397452	0.035221	0.461453	0	7.86301	0.277308	279.017	Sample_WT_Day4_Series011_5	WT_Day4_Series011	2	JH
	N2	Day 4 adult	66.292	0.324955	0.001912	0.393926	0	9.11847	0.292064	223.276	Sample_WT_Day4_Series011_5	WT_Day4_Series011	3	JH
	N2	Day 4 adult	77.3416	0.244314	-0.001062	0.344481	0	10.2177	0.410164	321.059	Sample_WT_Day4_Series011_5	WT_Day4_Series011	4	JH
	N2	Day 4 adult	73.075	0.348627	0.022089	0.435482	1.43167	9.87087	0.61863	407.788	Sample_WT_Day4_Series011_5	WT_Day4_Series011	5	JH
	N2	Day 4 adult	91.2911	0.388954	-0.010853	0.383589	0.614754	10.9106	0.369704	343.055	Sample_WT_Day4_Series012_5	WT_Day4_Series012	1	JH
	N2	Day 4 adult	107.513	0.316544	0.002869	0.291122	0	11.9049	0.509041	419.425	Sample_WT_Day4_Series012_5	WT_Day4_Series012	2	JH
	N2	Day 4 adult	74.8717	0.257808	-0.030037	0.437618	0	7.0115	0.362246	315.89	Sample_WT_Day4_Series012_5	WT_Day4_Series012	3	JH
	N2	Day 4 adult	71.9517	0.360979	0.006969	0.409459	2.17484	7.55285	0.07209	282.98	Sample_WT_Day4_Series012_5	WT_Day4_Series012	4	JH
	N2	Day 4 adult	48.6383	0.385543	0.001164	0.526955	0	4.71607	0.117451	192.523	Sample_WT_Day4_Series012_5	WT_Day4_Series012	5	JH
	N2	Day 4 adult	53.354	0.24275	0.030433	0.523743	0.622407	7.21276	0.225112	167.295	Sample_WT_Day4_Series014_5	WT_Day4_Series014	1	JH
	N2	Day 4 adult	60.5727	0.256465	-0.003647	0.382376	0.12959	9.19411	0.228946	245.714	Sample_WT_Day4_Series014_5	WT_Day4_Series014	2	JH
	N2	Day 4 adult	91.1074	0.150212	0.010017	0.374762	0	10.4257	0.381147	403.4	Sample_WT_Day4_Series014_5	WT_Day4_Series014	3	JH
	N2	Day 4 adult	87.8487	0.335501	0.002906	0.274444	0	8.19987	0.310907	295.797	Sample_WT_Day4_Series014_5	WT_Day4_Series014	4	JH
	N2	Day 4 adult	67.0637	0.316714	0.00387	0.341593	0	6.29508	0.231386	225.572	Sample_WT_Day4_Series014_5	WT_Day4_Series014	5	JH
	N2	Day 4 adult	91.2668	0.385494	-0.013548	0.341976	0	15.8651	0.405631	372.432	Sample_WT_Day4_Series015_4	WT_Day4_Series015	1	JH
	N2	Day 4 adult	91.2867	0.190637	-0.021222	0.40387	0	9.55346	0.35593	289.618	Sample_WT_Day4_Series015_4	WT_Day4_Series015	2	JH
	N2	Day 4 adult	120.142	0.377707	-0.004333	0.270369	0	11.7039	0.423269	396.161	Sample_WT_Day4_Series015_4	WT_Day4_Series015	3	JH
	N2	Day 4 adult	69.6867	0.362796	-0.006162	0.334913	1.06667	9.6853	0.268598	236.283	Sample_WT_Day4_Series015_4	WT_Day4_Series015	4	JH
	N2	Day 4 adult	60.0406	0.354585	-0.037993	0.377949	0.123967	10.6331	0.220421	206.345	Sample_WT_Day4_Series016_5	WT_Day4_Series016	1	JH
	N2	Day 4 adult	95.6916	0.395408	0.002801	0.294954	0	14.6175	0.345681	328.881	Sample_WT_Day4_Series016_5	WT_Day4_Series016	2	JH
	N2	Day 4 adult	79.6757	0.330116	-0.006442	0.359253	0.983607	9.49917	0.373171	270.458	Sample_WT_Day4_Series016_5	WT_Day4_Series016	3	JH
	N2	Day 4 adult	67.2724	0.257566	-0.001512	0.440496	0	8.70768	0.265129	234.44	Sample_WT_Day4_Series016_5	WT_Day4_Series016	4	JH
	N2	Day 4 adult	64.1419	0.323435	0.011133	0.531859	1.4248	5.97213	0.079047	286.852	Sample_WT_Day4_Series016_5	WT_Day4_Series016	5	JH
	N2	Day 8 adult	83.1359	0.21814	0.003659	0.302398	0	13.2229	0.401738	335.67	Sample_WT_Day8_Series002_3	WT_Day8_Series002	1	JH
	N2	Day 8 adult	93.1512	0.216545	-0.005638	0.293209	0	12.6139	0.369956	346.971	Sample_WT_Day8_Series002_3	WT_Day8_Series002	2	JH
	N2	Day 8 adult	35.1362	0.355037	-0.018993	0.458571	2.95302	4.39344	0.089556	149.183	Sample_WT_Day8_Series002_3	WT_Day8_Series002	3	JH
	N2	Day 8 adult	86.8327	0.326936	0.004906	0.326241	0.740741	7.94768	0.110684	364.009	Sample_WT_Day8_Series003_5	WT_Day8_Series003	1	JH
	N2	Day 8 adult	110.319	0.379401	0.004272	0.318896	0	11.8132	0.483281	433.21	Sample_WT_Day8_Series003_5	WT_Day8_Series003	2	JH
	N2	Day 8 adult	21.9206	0.977949	-0.010411	0.777726	5.89958	2.44696	0.090126	110.927	Sample_WT_Day8_Series003_5	WT_Day8_Series003	3	JH
	N2	Day 8 adult	95.8309	0.372643	-0.003048	0.296006	0	10.3098	0.471412	369.655	Sample_WT_Day8_Series003_5	WT_Day8_Series003	4	JH
	N2	Day 8 adult	92.319	0.372359	-0.006076	0.41374	0.794702	10.6069	0.257652	373.92	Sample_WT_Day8_Series003_5	WT_Day8_Series003	5	JH
	N2	Day 8 adult	69.7934	0.412132	0.001355	0.296678	1.24224	7.73072	0.181755	237.481	Sample_WT_Day8_Series007_3	WT_Day8_Series007	1	JH
	N2	Day 8 adult	60.421	0.305242	-0.014856	0.396888	1.75365	9.33321	0.371807	253.048	Sample_WT_Day8_Series007_3	WT_Day8_Series007	2	JH
	N2	Day 8 adult	91.7951	0.391399	0.004022	0.342395	0	15.2172	0.420356	334.996	Sample_WT_Day8_Series007_3	WT_Day8_Series007	3	JH
	N2	Day 8 adult	77.3099	0.401078	0.007369	0.375942	0	11.8322	0.367113	252.478	Sample_WT_Day8_Series009b_5	WT_Day8_Series009b	1	JH
	N2	Day 8 adult	65.0639	0.306935	-0.002475	0.298483	0	9.07863	0.230931	226.849	Sample_WT_Day8_Series009b_5	WT_Day8_Series009b	2	JH
	N2	Day 8 adult	93.896	0.316397	-0.0042	0.362596	0.375	14.2121	0.435622	369.176	Sample_WT_Day8_Series009b_5	WT_Day8_Series009b	3	JH
	N2	Day 8 adult	56.4088	0.171122	0.000826	0.537621	0	8.42434	0.117543	181.572	Sample_WT_Day8_Series009b_5	WT_Day8_Series009b	4	JH
	N2	Day 8 adult	120.837	0.533354	0.004252	0.325362	0	12.7418	0.432725	403.49	Sample_WT_Day8_Series009b_5	WT_Day8_Series009b	5	JH
	N2	Day 8 adult	77.0884	0.336618	-0.007967	0.275819	0	10.2346	0.304706	258.645	Sample_WT_Day8_Series012_5	WT_Day8_Series012	1	JH
	N2	Day 8 adult	63.4069	0.108264	0.036984	0.27547	0	9.3277	0.324064	246.25	Sample_WT_Day8_Series012_5	WT_Day8_Series012	2	JH
	N2	Day 8 adult	60.7309	0.406046	-0.002423	0.387093	0	6.94681	0.403687	265.611	Sample_WT_Day8_Series012_5	WT_Day8_Series012	3	JH
	N2	Day 8 adult	60.9845	0.37061	-0.003003	0.585583	0.12959	11.2179	0.369034	259.826	Sample_WT_Day8_Series012_5	WT_Day8_Series012	4	JH
	N2	Day 8 adult	69.1019	0.17145	-0.005798	0.325745	0	9.41469	0.122696	282.647	Sample_WT_Day8_Series012_5	WT_Day8_Series012	5	JH
	N2	Day 8 adult	114.519	0.563843	-0.010078	0.283213	0	13.6013	0.440292	402.043	Sample_WT_Day8_Series013_5	WT_Day8_Series013	1	JH
	N2	Day 8 adult	60.5041	0.290763	-0.010495	0.346164	0	9.9318	0.290249	216.798	Sample_WT_Day8_Series013_5	WT_Day8_Series013	2	JH
	N2	Day 8 adult	78.6685	0.385436	-0.002334	0.365766	0	14.7632	0.402391	322.08	Sample_WT_Day8_Series013_5	WT_Day8_Series013	3	JH
	N2	Day 8 adult	59.8672	0.40962	-0.0028	0.453142	0.995851	6.12909	0.230989	325.112	Sample_WT_Day8_Series013_5	WT_Day8_Series013	4	JH
	N2	Day 8 adult	101.273	0.413031	0.004785	0.348626	0	13.6058	0.454878	387.913	Sample_WT_Day8_Series013_5	WT_Day8_Series013	5	JH
	N2	Day 8 adult	100.871	0.343788	-0.001604	0.299692	0	15.8081	0.411757	337.997	Sample_WT_Day8_Series014_5	WT_Day8_Series014	1	JH
	N2	Day 8 adult	72.8064	0.449843	-0.009186	0.353905	0	12.6775	0.421158	309.314	Sample_WT_Day8_Series014_5	WT_Day8_Series014	2	JH
	N2	Day 8 adult	60.8104	0.342997	-0.052665	0.500081	0	7.82243	0.193199	236.254	Sample_WT_Day8_Series014_5	WT_Day8_Series014	3	JH
	N2	Day 8 adult	103.787	0.61946	-0.019891	0.281572	0	6.85912	0.197661	461.794	Sample_WT_Day8_Series014_5	WT_Day8_Series014	4	JH
	N2	Day 8 adult	78.051	0.221078	-0.00454	0.369038	0	6.19559	0.392559	424.734	Sample_WT_Day8_Series014_5	WT_Day8_Series014	5	JH
	N2	Day 8 adult	95.0304	0.2896	0.001775	0.311599	0	12.422	0.231506	321.779	Sample_WT_Day8_Series015_5	WT_Day8_Series015	1	JH
	N2	Day 8 adult	45.1251	0.327439	0.006158	0.427739	0	7.23508	0.098581	141.436	Sample_WT_Day8_Series015_5	WT_Day8_Series015	2	JH
	N2	Day 8 adult	51.4743	0.243873	0.016262	0.533875	0.130152	9.92365	0.264637	256.594	Sample_WT_Day8_Series015_5	WT_Day8_Series015	3	JH
	N2	Day 8 adult	82.8989	0.495684	0.014441	0.317205	0.784314	17.2393	0.224777	310.174	Sample_WT_Day8_Series015_5	WT_Day8_Series015	4	JH
	N2	Day 8 adult	61.0533	0.277701	0.013966	0.467441	0.276498	8.56963	0.237124	221.947	Sample_WT_Day8_Series015_5	WT_Day8_Series015	5	JH
	N2	Day 8 adult	108.189	0.295528	-0.007041	0.252159	0	17.2244	0.356264	310.388	Sample_WT_Day8_Series016_5	WT_Day8_Series016	1	JH
	N2	Day 8 adult	57.7893	0.251148	-0.00278	0.421058	0	14.9688	0.353922	202.33	Sample_WT_Day8_Series016_5	WT_Day8_Series016	2	JH
	N2	Day 8 adult	60.704	0.315347	-0.002078	0.356413	0	10.6045	0.286883	256.128	Sample_WT_Day8_Series016_5	WT_Day8_Series016	3	JH
	N2	Day 8 adult	92.2896	0.628824	0.002621	0.305769	0.376569	7.2411	0.136231	435.405	Sample_WT_Day8_Series016_5	WT_Day8_Series016	4	JH
	N2	Day 8 adult	121.164	0.426535	-0.005977	0.299536	0	24.0321	0.516129	496.07	Sample_WT_Day8_Series016_5	WT_Day8_Series016	5	JH
	N2	Day 8 adult	78.9871	0.220836	-0.012563	0.41934	1.12266	10.5916	0.390238	309.142	Sample_WT_Day8_Series017b_3	WT_Day8_Series017b	1	JH
	N2	Day 8 adult	55.8377	0.302357	0.03422	0.487117	2.375	8.65776	0.336259	290.381	Sample_WT_Day8_Series017b_3	WT_Day8_Series017b	2	JH
	N2	Day 8 adult	59.8613	0.3125	-0.023048	0.378489	0.376569	10.5021	0.473	268.967	Sample_WT_Day8_Series017b_3	WT_Day8_Series017b	3	JH
	N2	Day 8 adult	106.424	0.549864	-0.000298	0.328073	0.246407	12.7206	0.423632	394.918	Sample_WT_Day8_Series019_5	WT_Day8_Series019	1	JH
	N2	Day 8 adult	82.4055	0.314732	0.005926	0.357041	2.23141	9.01702	0.360238	306.332	Sample_WT_Day8_Series019_5	WT_Day8_Series019	2	JH
	N2	Day 8 adult	92.4564	0.425568	0.006205	0.334659	0.125523	14.8492	0.501351	358.837	Sample_WT_Day8_Series019_5	WT_Day8_Series019	3	JH
	N2	Day 8 adult	101.612	0.407818	-0.008542	0.337974	0	19.4531	0.886479	725.437	Sample_WT_Day8_Series019_5	WT_Day8_Series019	4	JH
	N2	Day 8 adult	61.0524	0.229378	0.029964	0.389876	0	10.5791	0.213111	215.022	Sample_WT_Day8_Series019_5	WT_Day8_Series019	5	JH
	N2	Day 8 adult	50.7242	0.252935	-0.002329	0.539355	0.635593	5.03312	0.319185	239.646	Sample_WT_Day8_Series020_5	WT_Day8_Series020	1	JH
	N2	Day 8 adult	75.9053	0.432709	-0.03203	0.383448	2.45161	7.66463	0.274163	398.894	Sample_WT_Day8_Series020_5	WT_Day8_Series020	2	JH
	N2	Day 8 adult	63.3004	0.415637	-0.004112	0.53948	1.2931	9.87305	0.338535	290.657	Sample_WT_Day8_Series020_5	WT_Day8_Series020	3	JH
	N2	Day 8 adult	92.668	0.348939	-0.009218	0.319184	0.403587	11.3451	0.073415	351.761	Sample_WT_Day8_Series020_5	WT_Day8_Series020	4	JH
	N2	Day 8 adult	91.926	0.612149	-0.004563	0.389922	1.39535	7.95785	0.072837	335.793	Sample_WT_Day8_Series020_5	WT_Day8_Series020	5	JH
	mir-1(gk276)	Day 4 adult	75.195	0.140196	-0.010065	0.36241	0	8.9737	0.128193	300.922	Sample_mir1_Day4_Series001_3	mir1_Day4_Series001	1	JH
	mir-1(gk276)	Day 4 adult	63.4814	0.248362	0.006956	0.41537	0	8.49529	0.110968	238.69	Sample_mir1_Day4_Series001_3	mir1_Day4_Series001	2	JH
	mir-1(gk276)	Day 4 adult	78.9045	0.27608	-0.002262	0.421694	0.660793	8.82878	0.359542	281.198	Sample_mir1_Day4_Series001_3	mir1_Day4_Series001	3	JH
	mir-1(gk276)	Day 4 adult	67.6909	0.365663	-0.025698	0.406281	0	8.0678	0.255613	242.052	Sample_mir1_Day4_Series002_4	mir1_Day4_Series002	1	JH
	mir-1(gk276)	Day 4 adult	77.5895	0.296686	0.007303	0.441369	0.494845	9.95923	0.364596	254.464	Sample_mir1_Day4_Series002_4	mir1_Day4_Series002	2	JH
	mir-1(gk276)	Day 4 adult	90.5622	0.388231	-0.00468	0.343416	1.42241	11.5062	0.072299	341.646	Sample_mir1_Day4_Series002_4	mir1_Day4_Series002	3	JH
	mir-1(gk276)	Day 4 adult	76.6942	0.211406	0.009181	0.404713	0.130435	9.85822	0.408713	358.198	Sample_mir1_Day4_Series002_4	mir1_Day4_Series002	4	JH
	mir-1(gk276)	Day 4 adult	63.6432	0.45201	0.012228	0.546414	0.246407	9.12021	0.288351	279.712	Sample_mir1_Day4_Series004_5	mir1_Day4_Series004	1	JH
	mir-1(gk276)	Day 4 adult	105.457	0.413649	-0.001475	0.304433	0.617284	10.8239	0.432784	400.333	Sample_mir1_Day4_Series004_5	mir1_Day4_Series004	2	JH
	mir-1(gk276)	Day 4 adult	91.3885	0.386242	-0.013111	0.379876	0	11.9012	0.393657	358	Sample_mir1_Day4_Series004_5	mir1_Day4_Series004	3	JH
	mir-1(gk276)	Day 4 adult	61.8834	0.251563	0.031474	0.417403	0	11.1634	0.220286	273.029	Sample_mir1_Day4_Series004_5	mir1_Day4_Series004	4	JH
	mir-1(gk276)	Day 4 adult	65.1261	0.346241	-0.026644	0.423695	0	11.8121	0.225814	309.611	Sample_mir1_Day4_Series004_5	mir1_Day4_Series004	5	JH
	mir-1(gk276)	Day 4 adult	59.4077	0.287726	-0.053375	0.455048	0.36961	9.10074	0.33528	257.492	Sample_mir1_Day4_Series006_5	mir1_Day4_Series006	1	JH
	mir-1(gk276)	Day 4 adult	65.0799	0.419923	0.016825	0.441571	0	7.52361	0.332591	276.421	Sample_mir1_Day4_Series006_5	mir1_Day4_Series006	2	JH
	mir-1(gk276)	Day 4 adult	69.7599	0.140853	0.007445	0.508575	3.59743	7.2878	0.24705	311.876	Sample_mir1_Day4_Series006_5	mir1_Day4_Series006	3	JH
	mir-1(gk276)	Day 4 adult	24.0832	0.417316	0.004179	0.73188	3.11015	2.669	0.103275	124.648	Sample_mir1_Day4_Series006_5	mir1_Day4_Series006	4	JH
	mir-1(gk276)	Day 4 adult	60.5145	0.245333	0.007989	0.586315	4.68293	6.69463	0.368921	217.057	Sample_mir1_Day4_Series006_5	mir1_Day4_Series006	5	JH
	mir-1(gk276)	Day 4 adult	61.3814	0.323754	-0.013112	0.436921	0.525164	10.6854	0.2756	278.306	Sample_mir1_Day4_Series008_2	mir1_Day4_Series008	1	JH
	mir-1(gk276)	Day 4 adult	57.1079	0.23848	0.011958	0.366332	0	3.37426	0.147388	264.479	Sample_mir1_Day4_Series008_2	mir1_Day4_Series008	2	JH
	mir-1(gk276)	Day 4 adult	85.072	0.270089	-0.004505	0.409003	0.737705	10.838	0.216879	387.66	Sample_mir1_Day4_Series009_5	mir1_Day4_Series009	1	JH
	mir-1(gk276)	Day 4 adult	92.7351	0.327754	-0.004564	0.309656	0	10.499	0.358383	350.295	Sample_mir1_Day4_Series009_5	mir1_Day4_Series009	2	JH
	mir-1(gk276)	Day 4 adult	91.4767	0.302404	-0.00385	0.320296	0	10.2775	0.330093	246.538	Sample_mir1_Day4_Series009_5	mir1_Day4_Series009	3	JH
	mir-1(gk276)	Day 4 adult	76.9026	0.207329	-0.006581	0.318531	0	11.1885	0.284311	367.123	Sample_mir1_Day4_Series009_5	mir1_Day4_Series009	4	JH
	mir-1(gk276)	Day 4 adult	77.4239	0.291071	-0.005211	0.37605	0	12.9086	0.40827	319.553	Sample_mir1_Day4_Series009_5	mir1_Day4_Series009	5	JH
	mir-1(gk276)	Day 4 adult	30.6121	0.160596	-0.005875	0.640976	1.68103	4.73209	0.121428	170.993	Sample_mir1_Day4_Series010_4	mir1_Day4_Series010	1	JH
	mir-1(gk276)	Day 4 adult	58.5805	0.24698	0.009485	0.501568	0.131579	5.58197	0.189121	227.88	Sample_mir1_Day4_Series010_4	mir1_Day4_Series010	2	JH
	mir-1(gk276)	Day 4 adult	60.8882	0.286249	-0.007154	0.539412	1.3012	6.14522	0.302253	271.953	Sample_mir1_Day4_Series010_4	mir1_Day4_Series010	3	JH
	mir-1(gk276)	Day 4 adult	91.4998	0.367274	-0.014232	0.400394	0	8.5598	0.351541	310.708	Sample_mir1_Day4_Series010_4	mir1_Day4_Series010	4	JH
	mir-1(gk276)	Day 4 adult	67.8075	0.433011	-0.03227	0.425121	2.58727	10.6359	0.320058	269.645	Sample_mir1_Day4_Series011_3	mir1_Day4_Series011	1	JH
	mir-1(gk276)	Day 4 adult	91.3026	0.244386	-0.00133	0.313774	0	10.069	0.374804	306.815	Sample_mir1_Day4_Series011_3	mir1_Day4_Series011	2	JH
	mir-1(gk276)	Day 4 adult	91.649	0.323339	-0.005879	0.302607	1.03672	9.9933	0.081777	363.623	Sample_mir1_Day4_Series011_3	mir1_Day4_Series011	3	JH
	mir-1(gk276)	Day 4 adult	61.062	0.309117	0.04648	0.422084	1.36082	8.24679	0.264733	261.582	Sample_mir1_Day4_Series012_3	mir1_Day4_Series012	1	JH
	mir-1(gk276)	Day 4 adult	41.4007	0.233041	-0.012949	0.539116	6.62252	4.23521	0.090507	134.588	Sample_mir1_Day4_Series012_3	mir1_Day4_Series012	2	JH
	mir-1(gk276)	Day 4 adult	62.9401	0.208568	0.020319	0.444382	0	13.5135	0.347226	254.813	Sample_mir1_Day4_Series012_3	mir1_Day4_Series012	3	JH
	mir-1(gk276)	Day 4 adult	77.1343	0.166561	-0.01572	0.346829	0	10.4847	0.29998	269.215	Sample_mir1_Day4_Series013_4	mir1_Day4_Series013	1	JH
	mir-1(gk276)	Day 4 adult	72.7452	0.237121	0.025036	0.429508	0.124481	9.36253	0.305748	284.605	Sample_mir1_Day4_Series013_4	mir1_Day4_Series013	2	JH
	mir-1(gk276)	Day 4 adult	91.6708	0.223046	-0.003326	0.367182	0.875	10.0754	0.255832	391.824	Sample_mir1_Day4_Series013_4	mir1_Day4_Series013	3	JH
	mir-1(gk276)	Day 4 adult	60.9064	0.515134	-0.03703	0.454807	0	3.68689	0.218815	207.06	Sample_mir1_Day4_Series013_4	mir1_Day4_Series013	4	JH
	mir-1(gk276)	Day 4 adult	86.0245	0.381033	-0.012085	0.340782	0	11.0553	0.375202	325.966	Sample_mir1_Day4_Series015_5	mir1_Day4_Series015	1	JH
	mir-1(gk276)	Day 4 adult	102.506	0.481108	0.007473	0.337558	0	11.5883	0.350609	315.185	Sample_mir1_Day4_Series015_5	mir1_Day4_Series015	2	JH
	mir-1(gk276)	Day 4 adult	66.0315	0.224855	-0.010244	0.414734	0	8.72764	0.278735	262.369	Sample_mir1_Day4_Series015_5	mir1_Day4_Series015	3	JH
	mir-1(gk276)	Day 4 adult	60.6055	0.218573	-0.046914	0.425882	0	7.12869	0.249793	220.92	Sample_mir1_Day4_Series015_5	mir1_Day4_Series015	4	JH
	mir-1(gk276)	Day 4 adult	60.279	0.236782	-0.017288	0.601995	4	4.23989	0.296581	263.869	Sample_mir1_Day4_Series015_5	mir1_Day4_Series015	5	JH
	mir-1(gk276)	Day 4 adult	101.523	0.402497	-0.007173	0.33962	0	14.9599	0.463357	413.394	Sample_mir1_Day4_Series017_4	mir1_Day4_Series017	1	JH
	mir-1(gk276)	Day 4 adult	61.0049	0.357582	-0.016989	0.42234	2.82655	7.45032	0.226324	306.674	Sample_mir1_Day4_Series017_4	mir1_Day4_Series017	2	JH
	mir-1(gk276)	Day 4 adult	53.8365	0.255706	-5e-05	0.476859	8.5906	4.75371	0.213957	256.104	Sample_mir1_Day4_Series017_4	mir1_Day4_Series017	3	JH
	mir-1(gk276)	Day 4 adult	56.9427	0.32665	0.000449	0.544715	1.07143	3.34985	0.177099	220.654	Sample_mir1_Day4_Series017_4	mir1_Day4_Series017	4	JH
	mir-1(gk276)	Day 8 adult	60.7516	0.2306	-0.008492	0.368467	0.247423	9.48054	0.241658	214.995	Sample_mir1_Day8_Series001_5	mir1_Day8_Series001	1	JH
	mir-1(gk276)	Day 8 adult	47.2963	0.337543	-0.001134	0.477369	1.23967	8.92199	0.316035	207.25	Sample_mir1_Day8_Series001_5	mir1_Day8_Series001	2	JH
	mir-1(gk276)	Day 8 adult	87.5237	0.197866	-0.001008	0.391581	0	11.1681	0.371922	323.305	Sample_mir1_Day8_Series001_5	mir1_Day8_Series001	3	JH
	mir-1(gk276)	Day 8 adult	88.5493	0.317442	-0.003785	0.266999	0	10.8643	0.309527	317.604	Sample_mir1_Day8_Series001_5	mir1_Day8_Series001	4	JH
	mir-1(gk276)	Day 8 adult	61.3813	0.321738	-0.048344	0.45824	1.11628	14.6497	0.266272	271.949	Sample_mir1_Day8_Series001_5	mir1_Day8_Series001	5	JH
	mir-1(gk276)	Day 8 adult	90.7936	0.269043	-0.001856	0.325841	1.11111	8.67895	0.245608	353.363	Sample_mir1_Day8_Series002_5	mir1_Day8_Series002	1	JH
	mir-1(gk276)	Day 8 adult	93.1234	0.310872	-0.017567	0.322577	0.618557	12.6733	0.571081	420.307	Sample_mir1_Day8_Series002_5	mir1_Day8_Series002	2	JH
	mir-1(gk276)	Day 8 adult	55.8826	0.325142	0.061031	0.551919	3.43949	5.65467	0.269399	242.916	Sample_mir1_Day8_Series002_5	mir1_Day8_Series002	3	JH
	mir-1(gk276)	Day 8 adult	71.2111	0.207086	-0.014907	0.555045	2.38318	5.60722	0.223467	372.397	Sample_mir1_Day8_Series002_5	mir1_Day8_Series002	4	JH
	mir-1(gk276)	Day 8 adult	49.6781	0.311342	0.001297	0.516232	4.29594	3.01723	0.247062	220.951	Sample_mir1_Day8_Series002_5	mir1_Day8_Series002	5	JH
	mir-1(gk276)	Day 8 adult	91.0132	0.33568	0.004422	0.369652	1.1157	14.4291	0.466278	429.19	Sample_mir1_Day8_Series003_4	mir1_Day8_Series003	1	JH
	mir-1(gk276)	Day 8 adult	92.3027	0.380804	0.01297	0.323481	0.125261	13.5982	0.444556	340.637	Sample_mir1_Day8_Series003_4	mir1_Day8_Series003	2	JH
	mir-1(gk276)	Day 8 adult	60.5663	0.238323	0.001237	0.437909	1.21076	8.48072	0.384001	257.102	Sample_mir1_Day8_Series003_4	mir1_Day8_Series003	3	JH
	mir-1(gk276)	Day 8 adult	60.7369	0.422929	-0.014707	0.381966	0	4.92256	0.250443	257.534	Sample_mir1_Day8_Series003_4	mir1_Day8_Series003	4	JH
	mir-1(gk276)	Day 8 adult	8.92418	1.54549	0.054053	0.76757	5.40984	0.997313	0.060813	24.8531	Sample_mir1_Day8_Series004_5	mir1_Day8_Series004	1	JH
	mir-1(gk276)	Day 8 adult	89.3084	0.471172	-0.016964	0.363181	0	9.09314	0.389429	375.449	Sample_mir1_Day8_Series004_5	mir1_Day8_Series004	2	JH
	mir-1(gk276)	Day 8 adult	66.6551	0.29725	-0.023407	0.414607	0	11.5257	0.370706	279.083	Sample_mir1_Day8_Series004_5	mir1_Day8_Series004	3	JH
	mir-1(gk276)	Day 8 adult	31.8947	0.591124	0.030558	0.484623	0	6.00151	0.204444	223.019	Sample_mir1_Day8_Series004_5	mir1_Day8_Series004	4	JH
	mir-1(gk276)	Day 8 adult	99.7985	0.401046	0.011174	0.340217	0.444444	9.43374	0.400782	366.656	Sample_mir1_Day8_Series004_5	mir1_Day8_Series004	5	JH
	mir-1(gk276)	Day 8 adult	92.7732	0.102903	-0.003539	0.339253	0	12.4375	0.358603	356.021	Sample_mir1_Day8_Series005b_4	mir1_Day8_Series005b	1	JH
	mir-1(gk276)	Day 8 adult	60.1026	0.22872	-0.010244	0.501155	2.11618	9.54274	0.246296	235.379	Sample_mir1_Day8_Series005b_4	mir1_Day8_Series005b	2	JH
	mir-1(gk276)	Day 8 adult	44.5777	0.237119	0.01846	0.540631	4.15966	7.75624	0.21382	228.641	Sample_mir1_Day8_Series005b_4	mir1_Day8_Series005b	3	JH
	mir-1(gk276)	Day 8 adult	86.5365	0.261251	-0.000889	0.370492	0	11.3996	0.399223	326.517	Sample_mir1_Day8_Series005b_4	mir1_Day8_Series005b	4	JH
	mir-1(gk276)	Day 8 adult	29.4708	0.431082	0.022109	0.693519	10.795	5.772	0.19894	106.644	Sample_mir1_Day8_Series007_5	mir1_Day8_Series007	1	JH
	mir-1(gk276)	Day 8 adult	73.8995	0.302946	-0.002364	0.491752	1.25786	9.77809	0.248367	301.501	Sample_mir1_Day8_Series007_5	mir1_Day8_Series007	2	JH
	mir-1(gk276)	Day 8 adult	30.3817	0.177775	-0.030283	0.68139	7.72532	3.21499	0.166562	186.582	Sample_mir1_Day8_Series007_5	mir1_Day8_Series007	3	JH
	mir-1(gk276)	Day 8 adult	33.9788	0.286673	-0.020949	0.583734	7.73756	4.91567	0.119543	204.642	Sample_mir1_Day8_Series007_5	mir1_Day8_Series007	4	JH
	mir-1(gk276)	Day 8 adult	101.675	0.472712	0.00397	0.313699	1.2357	7.70958	0.507094	460.007	Sample_mir1_Day8_Series007_5	mir1_Day8_Series007	5	JH
	mir-1(gk276)	Day 8 adult	76.2541	0.193969	-0.001949	0.30629	0.123967	9.57867	0.266085	298.232	Sample_mir1_Day8_Series008_4	mir1_Day8_Series008	1	JH
	mir-1(gk276)	Day 8 adult	52.7166	0.198124	0.006539	0.569572	3.29114	6.84158	0.314136	238.989	Sample_mir1_Day8_Series008_4	mir1_Day8_Series008	2	JH
	mir-1(gk276)	Day 8 adult	64.1617	0.257471	-0.014165	0.451369	0.12685	8.06179	0.202415	332.89	Sample_mir1_Day8_Series008_4	mir1_Day8_Series008	3	JH
	mir-1(gk276)	Day 8 adult	60.5324	0.255565	-0.019367	0.544173	1.5103	5.86267	0.119024	219.012	Sample_mir1_Day8_Series008_4	mir1_Day8_Series008	4	JH
	mir-1(gk276)	Day 8 adult	21.9141	0.853009	0.049345	0.805238	2.5974	1.85149	0.081556	82.6455	Sample_mir1_Day8_Series009_4	mir1_Day8_Series009	1	JH
	mir-1(gk276)	Day 8 adult	96.3816	0.31239	-0.008109	0.313724	0.13363	12.8927	0.465351	357.692	Sample_mir1_Day8_Series009_4	mir1_Day8_Series009	2	JH
	mir-1(gk276)	Day 8 adult	61.0219	0.302603	-0.018402	0.520063	1.04478	4.92339	0.199869	291.873	Sample_mir1_Day8_Series009_4	mir1_Day8_Series009	3	JH
	mir-1(gk276)	Day 8 adult	91.7098	0.350605	-0.023459	0.360809	0	7.56028	0.442457	404.99	Sample_mir1_Day8_Series009_4	mir1_Day8_Series009	4	JH
	mir-1(gk276)	Day 8 adult	91.0595	0.596895	-0.011434	0.368587	0.245902	10.5356	0.35826	355.491	Sample_mir1_Day8_Series010_5	mir1_Day8_Series010	1	JH
	mir-1(gk276)	Day 8 adult	92.0236	0.434962	0.003799	0.359116	1.62162	13.8021	0.390576	397.601	Sample_mir1_Day8_Series010_5	mir1_Day8_Series010	2	JH
	mir-1(gk276)	Day 8 adult	60.1098	0.33494	-0.019493	0.497457	3.64017	11.5016	0.323974	285.597	Sample_mir1_Day8_Series010_5	mir1_Day8_Series010	3	JH
	mir-1(gk276)	Day 8 adult	60.4429	0.298948	-0.025525	0.520812	1.27388	9.85822	0.209169	332.524	Sample_mir1_Day8_Series010_5	mir1_Day8_Series010	4	JH
	mir-1(gk276)	Day 8 adult	68.0026	0.391013	-0.005037	0.432687	0	8.61327	0.35575	248.829	Sample_mir1_Day8_Series010_5	mir1_Day8_Series010	5	JH
	mir-1(gk276)	Day 8 adult	93.665	0.377459	0.016742	0.351554	0.123203	17.5675	0.346937	378.642	Sample_mir1_Day8_Series011_5	mir1_Day8_Series011	1	JH
	mir-1(gk276)	Day 8 adult	67.1023	0.486204	0.004402	0.381066	1.23203	13.7722	0.276478	295.018	Sample_mir1_Day8_Series011_5	mir1_Day8_Series011	2	JH
	mir-1(gk276)	Day 8 adult	58.4165	0.347486	-0.02606	0.457878	1.35803	11.3112	0.221864	268.705	Sample_mir1_Day8_Series011_5	mir1_Day8_Series011	3	JH
	mir-1(gk276)	Day 8 adult	21.2228	1.19155	-0.004434	0.673118	2.20302	2.30033	0.093543	83.3309	Sample_mir1_Day8_Series011_5	mir1_Day8_Series011	4	JH
	mir-1(gk276)	Day 8 adult	60.8156	0.448633	-0.003385	0.469599	4.21053	9.20973	0.376616	288.224	Sample_mir1_Day8_Series011_5	mir1_Day8_Series011	5	JH
	mir-1(gk276)	Day 8 adult	108.111	0.317328	-0.004496	0.319233	0	13.4406	0.369304	363.993	Sample_mir1_Day8_Series012_5	mir1_Day8_Series012	1	JH
	mir-1(gk276)	Day 8 adult	105.983	0.425227	0.026122	0.285495	0	12.5917	0.410019	375.81	Sample_mir1_Day8_Series012_5	mir1_Day8_Series012	2	JH
	mir-1(gk276)	Day 8 adult	67.0054	0.276112	0.004811	0.416536	1.2474	9.20744	0.164289	267.333	Sample_mir1_Day8_Series012_5	mir1_Day8_Series012	3	JH
	mir-1(gk276)	Day 8 adult	41.1129	0.420368	-0.021418	0.62839	2.68235	2.29582	0.141074	147.284	Sample_mir1_Day8_Series012_5	mir1_Day8_Series012	4	JH
	mir-1(gk276)	Day 8 adult	87.2651	0.365493	-0.015047	0.411126	0.431655	8.49869	0.288622	297.915	Sample_mir1_Day8_Series012_5	mir1_Day8_Series012	5	JH
	mir-1(gk276)	Day 8 adult	60.9725	0.430326	0.064348	0.483611	0.746888	10.1375	0.246719	254.507	Sample_mir1_Day8_Series013_3	mir1_Day8_Series013	1	JH
	mir-1(gk276)	Day 8 adult	61.3016	0.220766	0.01896	0.480311	1.36929	8.43266	0.266099	242.162	Sample_mir1_Day8_Series013_3	mir1_Day8_Series013	2	JH
	mir-1(gk276)	Day 8 adult	61.2828	0.228832	0.003894	0.470833	1.28571	4.13159	0.457498	317.608	Sample_mir1_Day8_Series013_3	mir1_Day8_Series013	3	JH
	N2;Q35	Day 4 adult	60.7542	0.238329	-0.003321	0.392767	0	7.86042	0.211944	288.496	Sample_Q35_Day4_Series002_5	Q35_Day4_Series002	1	JH
	N2;Q35	Day 4 adult	54.4099	0.384402	-0.008619	0.512899	0.252101	7.31035	0.288126	217.554	Sample_Q35_Day4_Series002_5	Q35_Day4_Series002	2	JH
	N2;Q35	Day 4 adult	36.2039	0.221308	-0.029396	0.589184	3.31797	3.74399	0.243828	210.828	Sample_Q35_Day4_Series002_5	Q35_Day4_Series002	3	JH
	N2;Q35	Day 4 adult	55.5136	0.276552	-0.003012	0.658609	7.85047	3.40356	0.117451	310.498	Sample_Q35_Day4_Series002_5	Q35_Day4_Series002	4	JH
	N2;Q35	Day 4 adult	41.7481	0.414096	-0.019235	0.659871	9.00763	2.1863	0.209299	196.001	Sample_Q35_Day4_Series002_5	Q35_Day4_Series002	5	JH
	N2;Q35	Day 4 adult	60.6384	0.353674	0.008198	0.308123	0	8.71441	0.220282	254.681	Sample_Q35_Day4_Series003_5	Q35_Day4_Series003	1	JH
	N2;Q35	Day 4 adult	17.8245	0.34525	0.037051	0.770183	12.8395	2.41378	0.063201	55.8722	Sample_Q35_Day4_Series003_5	Q35_Day4_Series003	2	JH
	N2;Q35	Day 4 adult	65.1384	0.212737	0.007799	0.385679	0.25	8.48168	0.343827	260.588	Sample_Q35_Day4_Series003_5	Q35_Day4_Series003	3	JH
	N2;Q35	Day 4 adult	37.9378	0.386786	-0.013683	0.5304	5.34521	4.61102	0.161511	155.502	Sample_Q35_Day4_Series003_5	Q35_Day4_Series003	4	JH
	N2;Q35	Day 4 adult	48.7357	0.259006	-0.015466	0.494024	6.45	3.31709	0.259551	208.191	Sample_Q35_Day4_Series003_5	Q35_Day4_Series003	5	JH
	N2;Q35	Day 4 adult	89.7671	0.460883	0.018049	0.288674	1.97531	5.192	0.14727	450.234	Sample_Q35_Day4_Series004_5	Q35_Day4_Series004	1	JH
	N2;Q35	Day 4 adult	10.7932	0.9126	0.035083	0.789058	1.74636	2.46705	0.079791	44.0024	Sample_Q35_Day4_Series004_5	Q35_Day4_Series004	2	JH
	N2;Q35	Day 4 adult	30.4965	0.219172	0.022172	0.54529	1.40426	3.51651	0.163827	162.319	Sample_Q35_Day4_Series004_5	Q35_Day4_Series004	3	JH
	N2;Q35	Day 4 adult	38.1438	0.1649	0.019646	0.557318	0.137931	4.49995	0.174553	150.166	Sample_Q35_Day4_Series004_5	Q35_Day4_Series004	4	JH
	N2;Q35	Day 4 adult	60.9424	0.156126	-0.012618	0.300262	0	3.29467	0.143753	237.435	Sample_Q35_Day4_Series004_5	Q35_Day4_Series004	5	JH
	N2;Q35	Day 4 adult	58.3363	0.399219	0.010134	0.43028	3.46392	7.73827	0.336399	213.746	Sample_Q35_Day4_Series006_5	Q35_Day4_Series006	1	JH
	N2;Q35	Day 4 adult	43.0313	0.199385	0.008399	0.482798	2.77311	7.22224	0.147868	202.516	Sample_Q35_Day4_Series006_5	Q35_Day4_Series006	2	JH
	N2;Q35	Day 4 adult	43.5265	0.423352	0.031005	0.500168	5.6962	5.54607	0.128709	225.137	Sample_Q35_Day4_Series006_5	Q35_Day4_Series006	3	JH
	N2;Q35	Day 4 adult	18.123	0.811872	-0.054377	0.938781	33.0396	0.353562	0.06072	36.0502	Sample_Q35_Day4_Series006_5	Q35_Day4_Series006	4	JH
	N2;Q35	Day 4 adult	35.9632	0.327934	0.014187	0.680316	12.4939	2.33202	0.15954	153.093	Sample_Q35_Day4_Series006_5	Q35_Day4_Series006	5	JH
	N2;Q35	Day 4 adult	45.0959	0.199933	-0.016054	0.50025	0	8.23226	0.265894	210.662	Sample_Q35_Day4_Series007_5	Q35_Day4_Series007	1	JH
	N2;Q35	Day 4 adult	30.3935	0.22702	-0.007108	0.536771	0	2.68178	0.219749	94.4271	Sample_Q35_Day4_Series007_5	Q35_Day4_Series007	2	JH
	N2;Q35	Day 4 adult	43.4766	0.373646	0.013208	0.542009	3.85809	5.64802	0.331257	163.589	Sample_Q35_Day4_Series007_5	Q35_Day4_Series007	3	JH
	N2;Q35	Day 4 adult	39.1245	0.508258	0.044	0.376565	0	8.43876	0.203783	324.87	Sample_Q35_Day4_Series007_5	Q35_Day4_Series007	4	JH
	N2;Q35	Day 4 adult	52.5384	0.13907	0.025164	0.513217	3.44498	4.56482	0.151131	223.347	Sample_Q35_Day4_Series007_5	Q35_Day4_Series007	5	JH
	N2;Q35	Day 4 adult	57.4641	0.353963	0.021454	0.444972	1.38947	7.44771	0.301994	220.959	Sample_Q35_Day4_Series008b_5	Q35_Day4_Series008b	1	JH
	N2;Q35	Day 4 adult	34.2832	0.410075	0.0088	0.60609	0.13363	4.93184	0.146313	159.976	Sample_Q35_Day4_Series008b_5	Q35_Day4_Series008b	2	JH
	N2;Q35	Day 4 adult	31.9896	0.308213	-0.010921	0.523257	2.57336	2.71629	0.17708	158.166	Sample_Q35_Day4_Series008b_5	Q35_Day4_Series008b	3	JH
	N2;Q35	Day 4 adult	26.4238	0.23821	-0.068165	0.476853	0	2.02251	0.086394	80.6298	Sample_Q35_Day4_Series008b_5	Q35_Day4_Series008b	4	JH
	N2;Q35	Day 4 adult	60.0554	0.287874	-0.004679	0.362461	0.306122	6.81204	0.351271	466.145	Sample_Q35_Day4_Series008b_5	Q35_Day4_Series008b	5	JH
	N2;Q35	Day 4 adult	8.13173	1.58821	0.060343	0.485255	9.625	0.807593	0.045782	17.0621	Sample_Q35_Day4_Series010_5	Q35_Day4_Series010	1	JH
	N2;Q35	Day 4 adult	7.42245	1.69563	0.228629	0.671029	22.7197	0.607728	0.043913	17.0604	Sample_Q35_Day4_Series010_5	Q35_Day4_Series010	2	JH
	N2;Q35	Day 4 adult	62.2656	0.496464	0.014011	0.50469	1.2931	7.50764	0.334669	388.503	Sample_Q35_Day4_Series010_5	Q35_Day4_Series010	3	JH
	N2;Q35	Day 4 adult	35.7843	0.273653	0.022783	0.608899	3.47439	5.34723	0.287194	165.699	Sample_Q35_Day4_Series010_5	Q35_Day4_Series010	4	JH
	N2;Q35	Day 4 adult	45.5551	0.359663	0.020289	0.670042	14.7692	3.15314	0.139336	157.101	Sample_Q35_Day4_Series010_5	Q35_Day4_Series010	5	JH
	N2;Q35	Day 4 adult	49.7948	0.208899	0.016731	0.525503	4.51883	6.55399	0.117297	314.473	Sample_Q35_Day4_Series011_4	Q35_Day4_Series011	1	JH
	N2;Q35	Day 4 adult	59.2644	0.372846	0.011742	0.459018	2.79661	6.20727	0.078494	217.061	Sample_Q35_Day4_Series011_4	Q35_Day4_Series011	2	JH
	N2;Q35	Day 4 adult	48.3013	0.396989	0.01084	0.561478	8.09422	4.83968	0.297368	294.756	Sample_Q35_Day4_Series011_4	Q35_Day4_Series011	3	JH
	N2;Q35	Day 4 adult	31.7407	0.343356	0.011007	0.515836	0.131579	6.08054	0.146579	140.32	Sample_Q35_Day4_Series011_4	Q35_Day4_Series011	4	JH
	N2;Q35	Day 4 adult	45.1588	0.367785	0.013668	0.523938	1.35524	6.36175	0.167392	181.299	Sample_Q35_Day4_Series012_5	Q35_Day4_Series012	1	JH
	N2;Q35	Day 4 adult	39.1128	0.248556	-0.015259	0.609505	5.3617	6.7377	0.260524	146.737	Sample_Q35_Day4_Series012_5	Q35_Day4_Series012	2	JH
	N2;Q35	Day 4 adult	46.628	0.343776	0.014436	0.548704	4.03471	6.90049	0.0793	176.234	Sample_Q35_Day4_Series012_5	Q35_Day4_Series012	3	JH
	N2;Q35	Day 4 adult	29.0606	0.181038	0.007368	0.579598	2.11268	4.17479	0.270748	158.116	Sample_Q35_Day4_Series012_5	Q35_Day4_Series012	4	JH
	N2;Q35	Day 4 adult	30.0997	0.680967	-0.059186	0.832021	8.92308	1.97971	0.139411	132.125	Sample_Q35_Day4_Series012_5	Q35_Day4_Series012	5	JH
	N2;Q35	Day 4 adult	20.0362	0.454121	-0.014702	0.744445	15.9588	1.39532	0.104916	66.6351	Sample_Q35_Day4_Series013_5	Q35_Day4_Series013	1	JH
	N2;Q35	Day 4 adult	56.9291	0.248335	0.012505	0.386353	0	7.39515	0.219195	207.911	Sample_Q35_Day4_Series013_5	Q35_Day4_Series013	2	JH
	N2;Q35	Day 4 adult	30.9429	0.265692	-0.018305	0.551099	1.53518	5.48162	0.285987	132.346	Sample_Q35_Day4_Series013_5	Q35_Day4_Series013	3	JH
	N2;Q35	Day 4 adult	34.752	0.284763	0.012895	0.667653	6.26667	3.56541	0.112151	123.167	Sample_Q35_Day4_Series013_5	Q35_Day4_Series013	4	JH
	N2;Q35	Day 4 adult	35.4316	0.194855	0.00292	0.477647	1.13207	2.70957	0.121147	182.995	Sample_Q35_Day4_Series013_5	Q35_Day4_Series013	5	JH
	N2;Q35	Day 4 adult	4.9125	1.68083	0.016117	0.173638	0	0.435821	0.031208	7.64903	Sample_Q35_Day4_Series014b_5	Q35_Day4_Series014b	1	JH
	N2;Q35	Day 4 adult	29.9666	0.184493	-0.000568	0.512743	0.125523	6.17567	0.203749	114.892	Sample_Q35_Day4_Series014b_5	Q35_Day4_Series014b	2	JH
	N2;Q35	Day 4 adult	40.6189	0.324519	0.015955	0.518957	1.00629	6.64933	0.235393	166.434	Sample_Q35_Day4_Series014b_5	Q35_Day4_Series014b	3	JH
	N2;Q35	Day 4 adult	15.7403	0.965364	-0.026607	0.731416	8.1761	1.31196	0.066978	49.22	Sample_Q35_Day4_Series014b_5	Q35_Day4_Series014b	4	JH
	N2;Q35	Day 4 adult	60.0175	0.155986	-0.051584	0.443005	0	3.06485	0.303128	302.264	Sample_Q35_Day4_Series014b_5	Q35_Day4_Series014b	5	JH
	N2;Q35	Day 4 adult	31.4515	0.372279	0.013884	0.579162	5.28688	5.07988	0.111789	187.37	Sample_Q35_Day4_Series016_3	Q35_Day4_Series016	1	JH
	N2;Q35	Day 4 adult	55.1896	0.211791	-0.00589	0.524508	0.933333	5.13346	0.097052	275.022	Sample_Q35_Day4_Series016_3	Q35_Day4_Series016	2	JH
	N2;Q35	Day 4 adult	42.7913	0.457422	0.00553	0.51401	6.42336	5.39065	0.095688	235.322	Sample_Q35_Day4_Series016_3	Q35_Day4_Series016	3	JH
	N2;Q35	Day 8 adult	4.83619	1.93705	-0.081032	0.215786	0	0.369991	0.025976	6.43591	Sample_Q35_Day8_Series001_5	Q35_Day8_Series001	1	JH
	N2;Q35	Day 8 adult	14.0328	1.0508	-0.07243	0.795251	0	1.19446	0.104781	48.7197	Sample_Q35_Day8_Series001_5	Q35_Day8_Series001	2	JH
	N2;Q35	Day 8 adult	10.3085	1.31797	0.052889	0.68042	3.27731	1.92419	0.08403	44.2425	Sample_Q35_Day8_Series001_5	Q35_Day8_Series001	3	JH
	N2;Q35	Day 8 adult	82.4816	0.366065	0.001825	0.310409	0	8.37081	0.291439	314.253	Sample_Q35_Day8_Series001_5	Q35_Day8_Series001	4	JH
	N2;Q35	Day 8 adult	82.8745	0.445173	0.002421	0.398455	1.28571	8.69548	0.270623	360.89	Sample_Q35_Day8_Series001_5	Q35_Day8_Series001	5	JH
	N2;Q35	Day 8 adult	11.509	1.20565	0.01018	0.429043	0	1.81041	0.077642	47.507	Sample_Q35_Day8_Series002_5	Q35_Day8_Series002	1	JH
	N2;Q35	Day 8 adult	29.7401	0.293886	0.020578	0.55702	2	2.78627	0.151801	143.3	Sample_Q35_Day8_Series002_5	Q35_Day8_Series002	2	JH
	N2;Q35	Day 8 adult	8.83909	1.36993	0.005455	0.657772	0.12685	0.898315	0.054614	29.5905	Sample_Q35_Day8_Series002_5	Q35_Day8_Series002	3	JH
	N2;Q35	Day 8 adult	5.27583	1.94796	-0.022951	0.171859	0	0.230845	0.025535	6.66527	Sample_Q35_Day8_Series002_5	Q35_Day8_Series002	4	JH
	N2;Q35	Day 8 adult	7.30474	1.72416	0.192204	0.532203	7.36111	0.547527	0.039993	16.1306	Sample_Q35_Day8_Series002_5	Q35_Day8_Series002	5	JH
	N2;Q35	Day 8 adult	5.89013	1.88471	-0.097662	0.274309	0	0.252922	0.028485	8.15906	Sample_Q35_Day8_Series003_5	Q35_Day8_Series003	1	JH
	N2;Q35	Day 8 adult	7.42464	1.63531	-0.052072	0.418479	0	0.906264	0.042506	15.8758	Sample_Q35_Day8_Series003_5	Q35_Day8_Series003	2	JH
	N2;Q35	Day 8 adult	6.80566	1.79157	0.066543	0.320789	0	0.773426	0.039789	15.9778	Sample_Q35_Day8_Series003_5	Q35_Day8_Series003	3	JH
	N2;Q35	Day 8 adult	29.1534	0.206118	0.007933	0.547579	0.375	4.32673	0.301304	147.976	Sample_Q35_Day8_Series003_5	Q35_Day8_Series003	4	JH
	N2;Q35	Day 8 adult	17.4367	0.682449	-0.046819	0.801484	3.07692	1.69112	0.129647	63.7653	Sample_Q35_Day8_Series003_5	Q35_Day8_Series003	5	JH
	N2;Q35	Day 8 adult	5.73078	1.95892	0.047191	0.262179	0	0.804462	0.037837	10.9693	Sample_Q35_Day8_Series004_4	Q35_Day8_Series004	1	JH
	N2;Q35	Day 8 adult	7.72774	1.72444	-0.006034	0.396074	0	0.98404	0.043937	16.5447	Sample_Q35_Day8_Series004_4	Q35_Day8_Series004	2	JH
	N2;Q35	Day 8 adult	8.96787	1.47235	0.082741	0.524194	0	1.32696	0.065555	27.9895	Sample_Q35_Day8_Series004_4	Q35_Day8_Series004	3	JH
	N2;Q35	Day 8 adult	7.37867	1.64916	-0.097415	0.474509	0	0.693418	0.070011	30.2039	Sample_Q35_Day8_Series004_4	Q35_Day8_Series004	4	JH
	N2;Q35	Day 8 adult	5.97483	1.8281	0.0233	0.204953	0	0.306582	0.031952	9.99937	Sample_Q35_Day8_Series005_3	Q35_Day8_Series005	1	JH
	N2;Q35	Day 8 adult	11.4239	1.27772	-0.042381	0.697601	0	0.803191	0.06487	37.7625	Sample_Q35_Day8_Series005_3	Q35_Day8_Series005	2	JH
	N2;Q35	Day 8 adult	10.2038	1.25339	-0.096178	0.44728	0	1.28664	0.056709	32.4099	Sample_Q35_Day8_Series005_3	Q35_Day8_Series005	3	JH
	N2;Q35	Day 8 adult	7.42692	1.79899	0.058762	0.478081	0	0.601214	0.053234	20.9298	Sample_Q35_Day8_Series006_5	Q35_Day8_Series006	1	JH
	N2;Q35	Day 8 adult	5.60474	1.71385	0.104873	0.30847	0	0.291859	0.028428	7.89857	Sample_Q35_Day8_Series006_5	Q35_Day8_Series006	2	JH
	N2;Q35	Day 8 adult	6.63319	1.86555	-0.022716	0.284517	0	1.10045	0.034977	12.1078	Sample_Q35_Day8_Series006_5	Q35_Day8_Series006	3	JH
	N2;Q35	Day 8 adult	8.66831	1.56091	-0.150197	0.560021	8.06941	0.496145	0.047323	25.5592	Sample_Q35_Day8_Series006_5	Q35_Day8_Series006	4	JH
	N2;Q35	Day 8 adult	16.0632	0.579332	-0.031121	0.566269	0	2.00955	0.236227	61.9163	Sample_Q35_Day8_Series006_5	Q35_Day8_Series006	5	JH
	N2;Q35	Day 8 adult	7.05826	1.68118	0.116757	0.651596	0	0.834781	0.052383	18.9333	Sample_Q35_Day8_Series007_5	Q35_Day8_Series007	1	JH
	N2;Q35	Day 8 adult	6.866	1.7055	0.171221	0.345527	0.122951	0.906695	0.046393	15.4349	Sample_Q35_Day8_Series007_5	Q35_Day8_Series007	2	JH
	N2;Q35	Day 8 adult	6.69395	1.67079	0.044508	0.411754	0	0.670803	0.047113	15.8425	Sample_Q35_Day8_Series007_5	Q35_Day8_Series007	3	JH
	N2;Q35	Day 8 adult	15.1874	0.778834	-0.003509	0.540485	3.85093	1.30006	0.088874	67.1343	Sample_Q35_Day8_Series007_5	Q35_Day8_Series007	4	JH
	N2;Q35	Day 8 adult	9.60082	1.36849	0.030177	0.695735	7.06638	1.19749	0.072216	42.1452	Sample_Q35_Day8_Series007_5	Q35_Day8_Series007	5	JH
	N2;Q35	Day 8 adult	9.84717	1.27302	-0.103648	0.566494	0	1.09016	0.070475	32.4968	Sample_Q35_Day8_Series008_4	Q35_Day8_Series008	1	JH
	N2;Q35	Day 8 adult	15.7401	1.01698	-0.044408	0.631763	0	1.66491	0.080745	63.262	Sample_Q35_Day8_Series008_4	Q35_Day8_Series008	2	JH
	N2;Q35	Day 8 adult	59.6185	0.22962	-0.038336	0.384615	0	8.28218	0.297593	225.931	Sample_Q35_Day8_Series008_4	Q35_Day8_Series008	3	JH
	N2;Q35	Day 8 adult	11.111	1.12667	0.013938	0.529771	0	1.26573	0.095985	31.6528	Sample_Q35_Day8_Series008_4	Q35_Day8_Series008	4	JH
	N2;Q35	Day 8 adult	7.24405	1.89909	-0.019894	0.278376	0	0.977466	0.030814	11.9178	Sample_Q35_Day8_Series009_4	Q35_Day8_Series009	1	JH
	N2;Q35	Day 8 adult	5.10057	1.94072	0.018435	0.282961	0	0.425079	0.028015	7.29933	Sample_Q35_Day8_Series009_4	Q35_Day8_Series009	2	JH
	N2;Q35	Day 8 adult	5.53376	1.73541	0.136389	0.310776	0	0.625074	0.033806	9.14606	Sample_Q35_Day8_Series009_4	Q35_Day8_Series009	3	JH
	N2;Q35	Day 8 adult	9.19362	1.39133	0.165173	0.390158	3	1.59479	0.054774	26.7715	Sample_Q35_Day8_Series009_4	Q35_Day8_Series009	4	JH
	N2;Q35	Day 8 adult	5.61728	1.90422	0.012721	0.40962	0	0.440056	0.030825	8.94161	Sample_Q35_Day8_Series010_5	Q35_Day8_Series010	1	JH
	N2;Q35	Day 8 adult	7.05223	1.6967	-0.08486	0.464987	0	0.73535	0.046711	17.5384	Sample_Q35_Day8_Series010_5	Q35_Day8_Series010	2	JH
	N2;Q35	Day 8 adult	32.1357	0.348288	-0.010214	0.534306	0.759494	5.99412	0.204993	147.305	Sample_Q35_Day8_Series010_5	Q35_Day8_Series010	3	JH
	N2;Q35	Day 8 adult	12.8074	1.14006	0.002114	0.571994	3.14411	0.9211	0.068631	43.8509	Sample_Q35_Day8_Series010_5	Q35_Day8_Series010	4	JH
	N2;Q35	Day 8 adult	104.779	0.393716	0.001242	0.336803	0.139535	10.5451	0.383914	361.159	Sample_Q35_Day8_Series010_5	Q35_Day8_Series010	5	JH
	N2;Q35	Day 8 adult	5.72936	1.88193	-0.040382	0.198352	0	0.240873	0.027946	7.96443	Sample_Q35_Day8_Series011_5	Q35_Day8_Series011	1	JH
	N2;Q35	Day 8 adult	6.44941	1.80886	0.072542	0.565252	0	0.488283	0.033474	11.8523	Sample_Q35_Day8_Series011_5	Q35_Day8_Series011	2	JH
	N2;Q35	Day 8 adult	5.20076	2.68634	0.08719	0.201118	0	0.188457	0.025993	6.73698	Sample_Q35_Day8_Series011_5	Q35_Day8_Series011	3	JH
	N2;Q35	Day 8 adult	7.22648	1.56058	0.020099	0.436087	0	1.45189	0.062778	22.8587	Sample_Q35_Day8_Series011_5	Q35_Day8_Series011	4	JH
	N2;Q35	Day 8 adult	8.49912	1.56081	0.045198	0.65314	12.7549	0.456884	0.047448	17.6242	Sample_Q35_Day8_Series011_5	Q35_Day8_Series011	5	JH
	N2;Q35	Day 8 adult	9.2094	1.31518	-0.059812	0.537295	0	1.28601	0.06998	31.6486	Sample_Q35_Day8_Series012_6	Q35_Day8_Series012	1	JH
	N2;Q35	Day 8 adult	15.1647	1.06618	-0.048292	0.547505	9.09836	1.87896	0.076419	48.8061	Sample_Q35_Day8_Series012_6	Q35_Day8_Series012	2	JH
	N2;Q35	Day 8 adult	6.61339	1.81422	-0.021028	0.249933	0	0.3691	0.027971	9.52403	Sample_Q35_Day8_Series012_6	Q35_Day8_Series012	3	JH
	N2;Q35	Day 8 adult	7.74937	1.56407	-0.10967	0.521121	0	0.589587	0.053282	18.7027	Sample_Q35_Day8_Series012_6	Q35_Day8_Series012	4	JH
	N2;Q35	Day 8 adult	5.41142	1.9653	-0.068459	0.281089	0	0.288299	0.0276	7.46941	Sample_Q35_Day8_Series012_6	Q35_Day8_Series012	5	JH
	N2;Q35	Day 8 adult	5.86717	1.88696	0.039586	0.276051	0	0.569143	0.028526	8.33012	Sample_Q35_Day8_Series012_6	Q35_Day8_Series012	6	JH
	mir-1(gk276);Q35	Day 4 adult	28.7034	0.32792	0.059895	0.570567	2.24066	3.46518	0.139583	132.696	Sample_mir1Q35_Day4_Series002_3	mir1Q35_Day4_Series002	1	JH
	mir-1(gk276);Q35	Day 4 adult	8.62935	1.54936	0.010504	0.697569	0	0.725958	0.055681	25.3119	Sample_mir1Q35_Day4_Series002_3	mir1Q35_Day4_Series002	2	JH
	mir-1(gk276);Q35	Day 4 adult	42.3399	0.158153	-0.022307	0.691629	7.63393	3.7569	0.1558	183.929	Sample_mir1Q35_Day4_Series002_3	mir1Q35_Day4_Series002	3	JH
	mir-1(gk276);Q35	Day 4 adult	51.9159	0.329689	-0.024001	0.612842	5.01071	7.12027	0.311099	251.05	Sample_mir1Q35_Day4_Series003_4	mir1Q35_Day4_Series003	1	JH
	mir-1(gk276);Q35	Day 4 adult	60.5687	0.267054	0.01957	0.643867	5.18182	6.66026	0.276133	259.061	Sample_mir1Q35_Day4_Series003_4	mir1Q35_Day4_Series003	2	JH
	mir-1(gk276);Q35	Day 4 adult	78.8194	0.280037	-0.002101	0.321899	0	8.76531	0.343059	327.289	Sample_mir1Q35_Day4_Series003_4	mir1Q35_Day4_Series003	3	JH
	mir-1(gk276);Q35	Day 4 adult	7.95443	1.59977	-0.107817	0.514959	3.15789	0.492891	0.065144	25.9454	Sample_mir1Q35_Day4_Series003_4	mir1Q35_Day4_Series003	4	JH
	mir-1(gk276);Q35	Day 4 adult	43.8063	0.34728	-0.036499	0.610768	3.625	5.53315	0.203857	153.756	Sample_mir1Q35_Day4_Series004_5	mir1Q35_Day4_Series004	1	JH
	mir-1(gk276);Q35	Day 4 adult	44.7023	0.288523	0.006713	0.665722	7.58621	2.88813	0.179882	198.322	Sample_mir1Q35_Day4_Series004_5	mir1Q35_Day4_Series004	2	JH
	mir-1(gk276);Q35	Day 4 adult	59.8888	0.256308	-0.011997	0.450155	0	4.05092	0.287737	267.294	Sample_mir1Q35_Day4_Series004_5	mir1Q35_Day4_Series004	3	JH
	mir-1(gk276);Q35	Day 4 adult	7.92195	1.65085	0.022616	0.616983	3.19613	0.159941	0.039821	9.6431	Sample_mir1Q35_Day4_Series004_5	mir1Q35_Day4_Series004	4	JH
	mir-1(gk276);Q35	Day 4 adult	14.0502	0.753689	-0.006659	0.543975	1.99489	0.164053	0.063727	40.7146	Sample_mir1Q35_Day4_Series004_5	mir1Q35_Day4_Series004	5	JH
	mir-1(gk276);Q35	Day 4 adult	59.5947	0.233437	0.004235	0.535517	5.12821	6.30398	0.216725	203.866	Sample_mir1Q35_Day4_Series005_5	mir1Q35_Day4_Series005	1	JH
	mir-1(gk276);Q35	Day 4 adult	45.0176	0.181514	-0.010927	0.411123	0.516129	5.31376	0.208109	167.525	Sample_mir1Q35_Day4_Series005_5	mir1Q35_Day4_Series005	2	JH
	mir-1(gk276);Q35	Day 4 adult	34.2146	0.1567	-0.016341	0.480621	0.652174	3.61785	0.102167	104.546	Sample_mir1Q35_Day4_Series005_5	mir1Q35_Day4_Series005	3	JH
	mir-1(gk276);Q35	Day 4 adult	54.5547	0.257363	0.000316	0.545587	5.08009	5.07439	0.308808	256.976	Sample_mir1Q35_Day4_Series005_5	mir1Q35_Day4_Series005	4	JH
	mir-1(gk276);Q35	Day 4 adult	22.5086	0.736373	0.118498	0.723695	12.6977	0.791626	0.08093	43.9117	Sample_mir1Q35_Day4_Series005_5	mir1Q35_Day4_Series005	5	JH
	mir-1(gk276);Q35	Day 4 adult	30.7571	0.309349	-0.004658	0.621084	4.62617	2.24167	0.16078	122.947	Sample_mir1Q35_Day4_Series006_1	mir1Q35_Day4_Series006	1	JH
	mir-1(gk276);Q35	Day 4 adult	8.51882	1.49209	-0.023211	0.386353	7.45342	0.750175	0.075502	11.8159	Sample_mir1Q35_Day4_Series007_4	mir1Q35_Day4_Series007	1	JH
	mir-1(gk276);Q35	Day 4 adult	58.3595	0.211572	0.002617	0.425327	0.25974	6.96115	0.22113	223.006	Sample_mir1Q35_Day4_Series007_4	mir1Q35_Day4_Series007	2	JH
	mir-1(gk276);Q35	Day 4 adult	55.6863	0.237093	-0.009954	0.541075	4.19214	6.54316	0.268257	264.153	Sample_mir1Q35_Day4_Series007_4	mir1Q35_Day4_Series007	3	JH
	mir-1(gk276);Q35	Day 4 adult	41.5236	0.175224	0.01361	0.545196	0	2.91236	0.254307	154.094	Sample_mir1Q35_Day4_Series007_4	mir1Q35_Day4_Series007	4	JH
	mir-1(gk276);Q35	Day 4 adult	61.1301	0.127703	0.031053	0.372517	0	10.1647	0.289583	283.886	Sample_mir1Q35_Day4_Series008_3	mir1Q35_Day4_Series008	1	JH
	mir-1(gk276);Q35	Day 4 adult	61.0994	0.158841	0.010385	0.395717	2.51046	8.44593	0.302422	264.943	Sample_mir1Q35_Day4_Series008_3	mir1Q35_Day4_Series008	2	JH
	mir-1(gk276);Q35	Day 4 adult	63.5416	0.148603	-0.016389	0.398742	0.413793	8.1452	0.362113	282.34	Sample_mir1Q35_Day4_Series008_3	mir1Q35_Day4_Series008	3	JH
	mir-1(gk276);Q35	Day 4 adult	41.1272	0.270648	-0.02521	0.560777	13.7037	8.22678	0.130081	159.1	Sample_mir1Q35_Day4_Series009_5	mir1Q35_Day4_Series009	1	JH
	mir-1(gk276);Q35	Day 4 adult	44.803	0.360875	-0.010758	0.675243	7.64579	2.95953	0.222651	240.826	Sample_mir1Q35_Day4_Series009_5	mir1Q35_Day4_Series009	2	JH
	mir-1(gk276);Q35	Day 4 adult	45.3383	0.306654	0.033622	0.529892	2.3341	4.29786	0.25002	193.827	Sample_mir1Q35_Day4_Series009_5	mir1Q35_Day4_Series009	3	JH
	mir-1(gk276);Q35	Day 4 adult	61.6952	0.243394	-0.00138	0.503805	4.44444	4.75095	0.32881	338.833	Sample_mir1Q35_Day4_Series009_5	mir1Q35_Day4_Series009	4	JH
	mir-1(gk276);Q35	Day 4 adult	46.1578	0.191318	0.011469	0.614502	7.48092	2.8848	0.2168	184.767	Sample_mir1Q35_Day4_Series009_5	mir1Q35_Day4_Series009	5	JH
	mir-1(gk276);Q35	Day 4 adult	31.5569	0.183415	0.02104	0.684681	1.11801	4.63113	0.169901	163.729	Sample_mir1Q35_Day4_Series010_5	mir1Q35_Day4_Series010	1	JH
	mir-1(gk276);Q35	Day 4 adult	14.2509	0.690691	-0.00365	0.586527	3.61111	0.239231	0.08603	25.0256	Sample_mir1Q35_Day4_Series010_5	mir1Q35_Day4_Series010	2	JH
	mir-1(gk276);Q35	Day 4 adult	60.4355	0.347799	0.002642	0.446998	0.436893	4.17991	0.276825	271.669	Sample_mir1Q35_Day4_Series010_5	mir1Q35_Day4_Series010	3	JH
	mir-1(gk276);Q35	Day 4 adult	44.4784	0.339737	0.003041	0.666582	7.29528	2.39627	0.215335	201.246	Sample_mir1Q35_Day4_Series010_5	mir1Q35_Day4_Series010	4	JH
	mir-1(gk276);Q35	Day 4 adult	15.342	0.596471	0.075303	0.643174	5.21739	1.58384	0.082154	40.3077	Sample_mir1Q35_Day4_Series010_5	mir1Q35_Day4_Series010	5	JH
	mir-1(gk276);Q35	Day 4 adult	32.7436	0.152307	-0.020109	0.547226	2.23603	3.86932	0.210391	175.122	Sample_mir1Q35_Day4_Series011_5	mir1Q35_Day4_Series011	1	JH
	mir-1(gk276);Q35	Day 4 adult	13.7204	0.459953	0.052393	0.86856	40.5616	0.334658	0.099599	26.6647	Sample_mir1Q35_Day4_Series011_5	mir1Q35_Day4_Series011	2	JH
	mir-1(gk276);Q35	Day 4 adult	24.9456	0.389598	0.029342	0.609177	4.0724	3.41246	0.101297	119.488	Sample_mir1Q35_Day4_Series011_5	mir1Q35_Day4_Series011	3	JH
	mir-1(gk276);Q35	Day 4 adult	60.5789	0.29795	0.008489	0.463638	0.562061	3.89541	0.371331	314.852	Sample_mir1Q35_Day4_Series011_5	mir1Q35_Day4_Series011	4	JH
	mir-1(gk276);Q35	Day 4 adult	20.0524	0.906588	-0.004832	0.521023	2.34987	1.98519	0.128158	67.4087	Sample_mir1Q35_Day4_Series011_5	mir1Q35_Day4_Series011	5	JH
	mir-1(gk276);Q35	Day 4 adult	17.3696	0.58404	0.08266	0.510595	0	1.17899	0.080847	58.1383	Sample_mir1Q35_Day4_Series012_5	mir1Q35_Day4_Series012	1	JH
	mir-1(gk276);Q35	Day 4 adult	63.8328	0.307675	-0.043396	0.355299	0.26087	6.97407	0.309829	266.377	Sample_mir1Q35_Day4_Series012_5	mir1Q35_Day4_Series012	2	JH
	mir-1(gk276);Q35	Day 4 adult	59.821	0.476657	-0.02866	0.427111	0	4.31551	0.225614	257.47	Sample_mir1Q35_Day4_Series012_5	mir1Q35_Day4_Series012	3	JH
	mir-1(gk276);Q35	Day 4 adult	25.5425	0.451325	-0.064224	0.774301	18.3942	1.27404	0.124252	108.98	Sample_mir1Q35_Day4_Series012_5	mir1Q35_Day4_Series012	4	JH
	mir-1(gk276);Q35	Day 4 adult	59.9181	0.39598	-0.008133	0.540809	6.27737	2.51676	0.358737	275.811	Sample_mir1Q35_Day4_Series012_5	mir1Q35_Day4_Series012	5	JH
	mir-1(gk276);Q35	Day 4 adult	59.3295	0.288994	0.018372	0.49255	6.77201	7.11278	0.204686	260.952	Sample_mir1Q35_Day4_Series013_5	mir1Q35_Day4_Series013	1	JH
	mir-1(gk276);Q35	Day 4 adult	56.15	0.203482	0.012551	0.457142	2.07373	4.86966	0.326147	276.842	Sample_mir1Q35_Day4_Series013_5	mir1Q35_Day4_Series013	2	JH
	mir-1(gk276);Q35	Day 4 adult	47.1007	0.287714	0.036385	0.489897	6.4133	2.94105	0.213449	127.304	Sample_mir1Q35_Day4_Series013_5	mir1Q35_Day4_Series013	3	JH
	mir-1(gk276);Q35	Day 4 adult	36.9962	0.161258	-0.010351	0.60037	2.07407	4.38063	0.16516	201.588	Sample_mir1Q35_Day4_Series013_5	mir1Q35_Day4_Series013	4	JH
	mir-1(gk276);Q35	Day 4 adult	45.1074	0.37463	-0.031503	0.542469	1.5	3.40251	0.196274	202.859	Sample_mir1Q35_Day4_Series013_5	mir1Q35_Day4_Series013	5	JH
	mir-1(gk276);Q35	Day 8 adult	10.6734	1.47495	0.027655	0.641679	2.375	1.25279	0.079301	38.3857	Sample_mir1Q35_Day8_Series001_4	mir1Q35_Day8_Series001	1	JH
	mir-1(gk276);Q35	Day 8 adult	22.9581	0.196622	-0.035843	0.58546	6.91796	1.70004	0.109117	106.281	Sample_mir1Q35_Day8_Series001_4	mir1Q35_Day8_Series001	2	JH
	mir-1(gk276);Q35	Day 8 adult	91.1152	0.326573	0.033013	0.336195	0	12.9372	0.465856	428.307	Sample_mir1Q35_Day8_Series001_4	mir1Q35_Day8_Series001	3	JH
	mir-1(gk276);Q35	Day 8 adult	25.0153	0.305228	0.019389	0.455778	0.692841	5.93274	0.235901	78.7675	Sample_mir1Q35_Day8_Series001_4	mir1Q35_Day8_Series001	4	JH
	mir-1(gk276);Q35	Day 8 adult	29.3391	0.225925	-0.003938	0.595948	0.122951	3.12712	0.103286	153.632	Sample_mir1Q35_Day8_Series002_5	mir1Q35_Day8_Series002	1	JH
	mir-1(gk276);Q35	Day 8 adult	7.10524	1.66667	0.092499	0.547158	0	0.54983	0.068087	25.2999	Sample_mir1Q35_Day8_Series002_5	mir1Q35_Day8_Series002	2	JH
	mir-1(gk276);Q35	Day 8 adult	52.7036	0.354761	0.011037	0.576521	2.63736	6.95107	0.424948	178.38	Sample_mir1Q35_Day8_Series002_5	mir1Q35_Day8_Series002	3	JH
	mir-1(gk276);Q35	Day 8 adult	107.843	0.368576	0.001545	0.310869	0	13.9164	0.93238	709.031	Sample_mir1Q35_Day8_Series002_5	mir1Q35_Day8_Series002	4	JH
	mir-1(gk276);Q35	Day 8 adult	7.47531	1.8409	0.07727	0.419715	0	0.355565	0.059684	20.3697	Sample_mir1Q35_Day8_Series002_5	mir1Q35_Day8_Series002	5	JH
	mir-1(gk276);Q35	Day 8 adult	14.2615	0.89754	-0.057772	0.495765	2.6087	1.16717	0.097636	46.6956	Sample_mir1Q35_Day8_Series003_5	mir1Q35_Day8_Series003	1	JH
	mir-1(gk276);Q35	Day 8 adult	11.5543	1.16258	0.059087	0.681217	12	1.04159	0.066746	32.1659	Sample_mir1Q35_Day8_Series003_5	mir1Q35_Day8_Series003	2	JH
	mir-1(gk276);Q35	Day 8 adult	6.77133	1.74377	0.049703	0.352487	0	0.570202	0.041648	14.7502	Sample_mir1Q35_Day8_Series003_5	mir1Q35_Day8_Series003	3	JH
	mir-1(gk276);Q35	Day 8 adult	56.0318	0.354316	0.001794	0.360268	1.04478	1.86025	0.230348	214.021	Sample_mir1Q35_Day8_Series003_5	mir1Q35_Day8_Series003	4	JH
	mir-1(gk276);Q35	Day 8 adult	7.09211	1.71495	-0.094986	0.586443	0	0.868362	0.057701	22.9192	Sample_mir1Q35_Day8_Series003_5	mir1Q35_Day8_Series003	5	JH
	mir-1(gk276);Q35	Day 8 adult	6.29699	1.88347	0.018941	0.272172	0	0.358995	0.029137	9.11408	Sample_mir1Q35_Day8_Series004_4	mir1Q35_Day8_Series004	1	JH
	mir-1(gk276);Q35	Day 8 adult	5.58719	1.95696	-0.014706	0.279384	0	0.342695	0.030555	8.83312	Sample_mir1Q35_Day8_Series004_4	mir1Q35_Day8_Series004	2	JH
	mir-1(gk276);Q35	Day 8 adult	8.26943	1.66755	0.06272	0.556078	1.35524	1.38908	0.051328	21.7422	Sample_mir1Q35_Day8_Series004_4	mir1Q35_Day8_Series004	3	JH
	mir-1(gk276);Q35	Day 8 adult	9.0403	1.48978	-0.033789	0.474761	0.301508	0.620128	0.076385	44.5664	Sample_mir1Q35_Day8_Series004_4	mir1Q35_Day8_Series004	4	JH
	mir-1(gk276);Q35	Day 8 adult	22.7757	0.330946	-0.026421	0.533462	0	2.21138	0.161746	67.0463	Sample_mir1Q35_Day8_Series006_4	mir1Q35_Day8_Series006	1	JH
	mir-1(gk276);Q35	Day 8 adult	60.7263	0.333495	0.024412	0.400541	2.48366	10.865	0.07822	273.335	Sample_mir1Q35_Day8_Series006_4	mir1Q35_Day8_Series006	2	JH
	mir-1(gk276);Q35	Day 8 adult	75.9259	0.240748	-0.001631	0.345001	0.131868	6.89692	0.346316	351.28	Sample_mir1Q35_Day8_Series006_4	mir1Q35_Day8_Series006	3	JH
	mir-1(gk276);Q35	Day 8 adult	60.199	0.45138	0.002914	0.402309	0	1.34997	0.197865	186.21	Sample_mir1Q35_Day8_Series006_4	mir1Q35_Day8_Series006	4	JH
	mir-1(gk276);Q35	Day 8 adult	21.0988	0.580901	-0.018186	0.538839	0.372671	2.35126	0.112025	70.84	Sample_mir1Q35_Day8_Series007_3	mir1Q35_Day8_Series007	1	JH
	mir-1(gk276);Q35	Day 8 adult	11.8172	1.12471	0.037929	0.540866	0	1.09968	0.073786	44.4732	Sample_mir1Q35_Day8_Series007_3	mir1Q35_Day8_Series007	2	JH
	mir-1(gk276);Q35	Day 8 adult	10.2767	1.27853	-0.02509	0.492673	6.26087	0.968727	0.070468	34.4808	Sample_mir1Q35_Day8_Series007_3	mir1Q35_Day8_Series007	3	JH
	mir-1(gk276);Q35	Day 8 adult	8.58588	1.51409	0.048661	0.521531	0	1.08058	0.057925	24.8662	Sample_mir1Q35_Day8_Series008_4	mir1Q35_Day8_Series008	1	JH
	mir-1(gk276);Q35	Day 8 adult	6.4894	1.74424	-0.003311	0.423146	0	0.67602	0.039519	12.3202	Sample_mir1Q35_Day8_Series008_4	mir1Q35_Day8_Series008	2	JH
	mir-1(gk276);Q35	Day 8 adult	90.9905	0.317119	0.020806	0.350547	0.123967	12.3514	0.418042	380.094	Sample_mir1Q35_Day8_Series008_4	mir1Q35_Day8_Series008	3	JH
	mir-1(gk276);Q35	Day 8 adult	15.1093	0.978487	0.012459	0.562745	0	0.407596	0.070745	61.4233	Sample_mir1Q35_Day8_Series008_4	mir1Q35_Day8_Series008	4	JH
	mir-1(gk276);Q35	Day 8 adult	40.8437	0.115153	0.053438	0.451572	0	6.38157	0.221978	164.174	Sample_mir1Q35_Day8_Series009_6	mir1Q35_Day8_Series009	1	JH
	mir-1(gk276);Q35	Day 8 adult	10.7592	1.30649	0.076172	0.527485	0	0.664125	0.054558	31.6123	Sample_mir1Q35_Day8_Series009_6	mir1Q35_Day8_Series009	2	JH
	mir-1(gk276);Q35	Day 8 adult	12.4548	0.368766	0.018633	0.63622	5.21739	1.49022	0.081425	52.4843	Sample_mir1Q35_Day8_Series009_6	mir1Q35_Day8_Series009	3	JH
	mir-1(gk276);Q35	Day 8 adult	30.073	0.210406	0.023221	0.525867	1.7759	3.02184	0.134529	139.74	Sample_mir1Q35_Day8_Series009_6	mir1Q35_Day8_Series009	4	JH
	mir-1(gk276);Q35	Day 8 adult	6.76701	1.74984	-0.111952	0.533219	11.8455	0.680499	0.058103	13.1179	Sample_mir1Q35_Day8_Series009_6	mir1Q35_Day8_Series009	5	JH
	mir-1(gk276);Q35	Day 8 adult	8.00837	1.59967	0.06873	0.397827	0	0.337782	0.05165	22.5423	Sample_mir1Q35_Day8_Series009_6	mir1Q35_Day8_Series009	6	JH
	mir-1(gk276);Q35	Day 8 adult	8.996	1.62704	-0.056112	0.632672	0	0.933615	0.059931	26.7524	Sample_mir1Q35_Day8_Series010_5	mir1Q35_Day8_Series010	1	JH
	mir-1(gk276);Q35	Day 8 adult	46.1685	0.09591	-0.037216	0.420827	0	5.16859	0.206664	182.364	Sample_mir1Q35_Day8_Series010_5	mir1Q35_Day8_Series010	2	JH
	mir-1(gk276);Q35	Day 8 adult	11.4805	1.00313	-0.066993	0.635945	6.07438	1.17513	0.073058	38.9361	Sample_mir1Q35_Day8_Series010_5	mir1Q35_Day8_Series010	3	JH
	mir-1(gk276);Q35	Day 8 adult	60.5312	0.362153	0.062929	0.339153	0	7.84916	0.284075	259.066	Sample_mir1Q35_Day8_Series010_5	mir1Q35_Day8_Series010	4	JH
	mir-1(gk276);Q35	Day 8 adult	30.8731	0.24713	0.023833	0.424847	0	3.47317	0.217728	104.464	Sample_mir1Q35_Day8_Series010_5	mir1Q35_Day8_Series010	5	JH
	mir-1(gk276);Q35	Day 8 adult	7.10944	1.74029	-0.045258	0.404706	0	1.47814	0.047139	17.0906	Sample_mir1Q35_Day8_Series011_5	mir1Q35_Day8_Series011	1	JH
	mir-1(gk276);Q35	Day 8 adult	12.7947	0.559507	0.038659	0.69219	13.7988	1.25614	0.075071	43.7531	Sample_mir1Q35_Day8_Series011_5	mir1Q35_Day8_Series011	2	JH
	mir-1(gk276);Q35	Day 8 adult	53.4844	0.252322	-0.023646	0.438792	0	4.48183	0.169777	201.948	Sample_mir1Q35_Day8_Series011_5	mir1Q35_Day8_Series011	3	JH
	mir-1(gk276);Q35	Day 8 adult	79.2976	0.316995	0.011341	0.339262	2.88703	8.55641	0.327501	339.342	Sample_mir1Q35_Day8_Series011_5	mir1Q35_Day8_Series011	4	JH
	mir-1(gk276);Q35	Day 8 adult	7.46609	1.69013	-0.059934	0.777155	20.8421	0.647911	0.037989	23.3363	Sample_mir1Q35_Day8_Series011_5	mir1Q35_Day8_Series011	5	JH
	mir-1(gk276);Q35	Day 8 adult	6.5973	1.72774	0.025416	0.48667	0	0.644738	0.039473	12.6166	Sample_mir1Q35_Day8_Series012_5	mir1Q35_Day8_Series012	1	JH
	mir-1(gk276);Q35	Day 8 adult	13.6288	1.30783	-0.03403	0.637015	0	1.34614	0.050119	32.5859	Sample_mir1Q35_Day8_Series012_5	mir1Q35_Day8_Series012	2	JH
	mir-1(gk276);Q35	Day 8 adult	6.47315	1.82244	0.073679	0.192583	0	0.432801	0.028141	9.39316	Sample_mir1Q35_Day8_Series012_5	mir1Q35_Day8_Series012	3	JH
	mir-1(gk276);Q35	Day 8 adult	5.82239	1.9071	0.019114	0.201927	0	0.478232	0.028526	8.34166	Sample_mir1Q35_Day8_Series012_5	mir1Q35_Day8_Series012	4	JH
	mir-1(gk276);Q35	Day 8 adult	9.38861	1.48535	-0.161972	0.71086	16.7171	0.917697	0.06951	34.6181	Sample_mir1Q35_Day8_Series012_5	mir1Q35_Day8_Series012	5	JH
	mir-1(gk276);Q35	Day 8 adult	6.04128	1.79106	0.171796	0.431738	0	0.524399	0.040041	12.8452	Sample_mir1Q35_Day8_Series013_5	mir1Q35_Day8_Series013	1	JH
	mir-1(gk276);Q35	Day 8 adult	5.70953	1.84577	0.080746	0.328827	0	0.221228	0.029492	8.15729	Sample_mir1Q35_Day8_Series013_5	mir1Q35_Day8_Series013	2	JH
	mir-1(gk276);Q35	Day 8 adult	28.5733	0.265414	0.00131	0.533624	3.19829	2.61104	0.154866	145.329	Sample_mir1Q35_Day8_Series013_5	mir1Q35_Day8_Series013	3	JH
	mir-1(gk276);Q35	Day 8 adult	7.58594	1.60193	-0.013648	0.443604	2.06897	1.07703	0.049628	18.8693	Sample_mir1Q35_Day8_Series013_5	mir1Q35_Day8_Series013	4	JH
	mir-1(gk276);Q35	Day 8 adult	8.92191	1.40816	0.152597	0.588221	17.6623	1.39152	0.039147	23.3519	Sample_mir1Q35_Day8_Series013_5	mir1Q35_Day8_Series013	5	JH

## Sheet: 1d Bioinformatic screen 
	Supplemental file 1d: List of candidate genes with in silico predicted miR-1 binding sites using microRNA.org, TargetScanWorm and PicTar.
	Genes with predicted miR-1 binding sites	Database	Candidates tested in the motility screen
	abts-3	microRNA.org, PicTar, TargetScanWorm	x
	ace-1	microRNA.org, PicTar, TargetScanWorm	x
	acs-1	microRNA.org, PicTar, TargetScanWorm
	aex-4	microRNA.org, PicTar, TargetScanWorm
	alh-4	microRNA.org, PicTar, TargetScanWorm
	bar-1	microRNA.org, PicTar, TargetScanWorm	x
	chs-2	microRNA.org, PicTar, TargetScanWorm
	cnc-2	microRNA.org, PicTar, TargetScanWorm
	cwn-2	microRNA.org, PicTar, TargetScanWorm	x
	daf-16	microRNA.org, PicTar, TargetScanWorm	x
	dhhc-14	microRNA.org, PicTar, TargetScanWorm
	dhs-17	microRNA.org, PicTar, TargetScanWorm	x
	dpy-23	microRNA.org, PicTar, TargetScanWorm	x
	dyc-1	microRNA.org, PicTar, TargetScanWorm	x
	egl-46	microRNA.org, PicTar, TargetScanWorm	x
	egl-8	microRNA.org, PicTar, TargetScanWorm	x
	ets-4	microRNA.org, PicTar, TargetScanWorm
	flp-10	microRNA.org, PicTar, TargetScanWorm
	frm-8	microRNA.org, PicTar, TargetScanWorm	x
	glt-6	microRNA.org, PicTar, TargetScanWorm	x
	gly-3	microRNA.org, PicTar, TargetScanWorm
	grl-4	microRNA.org, PicTar, TargetScanWorm	x
	hyl-2	microRNA.org, PicTar, TargetScanWorm	x
	ifb-2	microRNA.org, PicTar, TargetScanWorm	x
	jun-1	microRNA.org, PicTar, TargetScanWorm
	kpc-1	microRNA.org, PicTar, TargetScanWorm	x
	let-363	microRNA.org, PicTar, TargetScanWorm
	lin-26	microRNA.org, PicTar, TargetScanWorm	x
	lpr-3	microRNA.org, PicTar, TargetScanWorm
	mlk-1	microRNA.org, PicTar, TargetScanWorm	x
	nac-3	microRNA.org, PicTar, TargetScanWorm	x
	ncs-2	microRNA.org, PicTar, TargetScanWorm	x
	ncx-1	microRNA.org, PicTar, TargetScanWorm	x
	nep-1	microRNA.org, PicTar, TargetScanWorm	x
	opt-3	microRNA.org, PicTar, TargetScanWorm	x
	pde-2	microRNA.org, PicTar, TargetScanWorm	x
	phat-5	microRNA.org, PicTar, TargetScanWorm
	pkc-1	microRNA.org, PicTar, TargetScanWorm	x
	pptr-2	microRNA.org, PicTar, TargetScanWorm
	raga-1	microRNA.org, PicTar, TargetScanWorm
	ras-2	microRNA.org, PicTar, TargetScanWorm	x
	scpl-3	microRNA.org, PicTar, TargetScanWorm
	sdn-1	microRNA.org, PicTar, TargetScanWorm	x
	sel-1	microRNA.org, PicTar, TargetScanWorm	x
	sma-9	microRNA.org, PicTar, TargetScanWorm	x
	snf-11	microRNA.org, PicTar, TargetScanWorm
	syd-2	microRNA.org, PicTar, TargetScanWorm	x
	syg-2	microRNA.org, PicTar, TargetScanWorm	x
	tag-275	microRNA.org, PicTar, TargetScanWorm
	tbc-6	microRNA.org, PicTar, TargetScanWorm
	tbc-7	microRNA.org, PicTar, TargetScanWorm
	tth-1	microRNA.org, PicTar, TargetScanWorm	x
	twk-7	microRNA.org, PicTar, TargetScanWorm
	unc-11	microRNA.org, PicTar, TargetScanWorm	x
	unc-18	microRNA.org, PicTar, TargetScanWorm	x
	unc-44	microRNA.org, PicTar, TargetScanWorm
	vha-1	microRNA.org, PicTar, TargetScanWorm	x
	vha-10	microRNA.org, PicTar, TargetScanWorm	x
	vha-12	microRNA.org, PicTar, TargetScanWorm	x
	vha-13	microRNA.org, PicTar, TargetScanWorm	x
	vha-14	microRNA.org, PicTar, TargetScanWorm	x
	vha-15	microRNA.org, PicTar, TargetScanWorm	x
	vha-17	microRNA.org, PicTar, TargetScanWorm
	vha-4	microRNA.org, PicTar, TargetScanWorm
	vha-5	microRNA.org, PicTar, TargetScanWorm	x
	vha-8	microRNA.org, PicTar, TargetScanWorm	x
	vha-9	microRNA.org, PicTar, TargetScanWorm	x
	zyx-1	microRNA.org, PicTar, TargetScanWorm	x

## Sheet: 1e RNAi motility screen
	Supplemental file 1e: RNAi motility screen.
	RNAi against	Number of mobile worms	Total number of worms	Percent mobile worms	Selected candidates for body bending assays	C. elegans RNAi CollectionA
	Bioinformatic candidates
	luciferase (control)	12	20	60
	daf-2 (control)	20	20	100
	abts-3	5	20	25		Ahringer
	ace-1	6	20	30		Vidal
	bar-1	4	20	20		Ahringer
	cwn-2	5	20	25		Vidal
	daf-16	0	20	0	x	Ahringer
	dhs-17	4	20	20		Ahringer
	dpy-23	1	20	5	x	Vidal
	dyc-1	10	20	50		Ahringer
	egl-46	2	20	10		Ahringer
	egl-8	8	20	40		Ahringer
	frm-8	5	20	25		Ahringer
	glt-6	6	20	30		Vidal
	grl-4	7	20	35		Vidal
	hyl-2	9	20	45		Ahringer
	ifb-2	5	20	25		Vidal
	kpc-1	1	20	5	x	Vidal
	lin-26	4	20	20		Vidal
	mlk-1	13	20	65		Ahringer
	nac-3	3	20	15		Vidal
	ncs-2	4	20	20		Ahringer
	ncx-1	5	20	25		Vidal
	nep-1	3	20	15		Ahringer
	opt-3	7	20	35		Vidal
	pde-2	0	20	0	x	Vidal
	pkc-1	9	20	45		Vidal
	ras-2	1	20	5	x	Vidal
	sdn-1	2	20	10		Vidal
	sel-1	6	20	30		Vidal
	sma-9	9	20	45		Ahringer
	syd-2	5	20	25		Ahringer
	syg-2	2	20	10		Vidal
	tth-1	1	20	5	x	Vidal
	unc-11	4	20	20		Vidal
	unc-18	5	20	25		Vidal
	vha-1	2	20	10	x	Vidal
	vha-5	4	20	20	x	Vidal
	vha-8	1	20	5	x	Vidal
	vha-9	2	20	10	x	Vidal
	vha-10	7	20	35	x	Vidal
	vha-12	5	20	25	x	Vidal
	vha-13	1	20	5	x	Vidal
	vha-14	0	20	0	x	Vidal
	vha-15	8	20	40	x	Vidal
	zyx-1	1	20	5	x	Vidal
	Proteomics candidates
	luciferase (control)	13	26	50
	afd-1	8	20	40		Ahringer
	alp-1	4	21	19.0476	x	Ahringer
	aly-3	9	22	40.9091		Ahringer
	amph-1	5	20	25		Ahringer
	asns-2	14	24	58.3333		Ahringer
	ccdc-55	5	23	21.7391	x, miR-1 BS	Ahringer
	col-71	8	19	42.1053		Vidal
	cul-4	7	21	33.3333		Ahringer
	deb-1	4	20	20		Ahringer
	dss-1	8	20	40		Vidal
	dtmk-1	8	21	38.0952		Ahringer
	frm-1	7	22	31.8182		Ahringer
	fubl-1	4	20	20		Ahringer
	gyg-1	11	26	42.3077		Ahringer
	hil-4	6	24	25		Ahringer
	hmg-12	8	24	33.3333		Ahringer
	hpo-18	12	22	54.5455		Ahringer
	hsp-17	3	17	17.6471	x	Vidal
	hsr-9	8	22	36.3636		Ahringer
	irg-7	7	25	28		Ahringer
	klc-2	7	22	31.8182		Ahringer
	lec-3	4	24	16.6667		Ahringer
	lmn-1	10	20	50		Ahringer
	mua-3	10	20	50		Ahringer
	mup-2	7	16	43.75		Ahringer
	nex-1	9	24	37.5		Ahringer
	npp-10	11	25	44		Ahringer
	npp-16	5	18	27.7778		Ahringer
	nrfl-1	2	23	8.69565	x	Ahringer
	pfd-2	6	20	30		Vidal
	pfd-4	5	23	21.7391		Ahringer
	pinn-4	9	17	52.9412		Vidal
	rnp-4	3	21	14.2857		Ahringer
	rsp-3	7	17	41.1765		Vidal
	sams-4	4	23	17.3913		Ahringer
	snr-5	4	17	23.5294		Ahringer
	snx-6	7	20	35		Ahringer
	spt-4	5	20	25		Ahringer
	tni-1	7	22	31.8182		Ahringer
	unc-23	7	22	31.8182		Ahringer
	unc-87	11	23	47.8261		Ahringer
	uri-1	7	20	35		Ahringer
	valv-1	7	20	35		Ahringer
	vha-10	nd B	nd B	nd B	x, miR-1 BS	Vidal
	vha-19	2	20	10	x, miR-1 BS	Ahringer
	wrt-2	5	18	27.7778		Ahringer
	zyx-1	8	19	42.1053	x, miR-1 BS	Ahringer
	A RNAi clones are from the Ahringer RNAi Collection (Ahringer) or from the Vidal ORF-RNAi Resource (Vidal).
	B nd, not determined. Worms did not grow on the vha-10 RNAi. Experiment was not performed.
	miR-1 BS, miR-1 binding side.
	Blue, vacuolar ATPase subunits.

## Sheet: 1f proteomics
	Supplemental file 1f: Proteomic analysis of differentially regulated proteins in mir-1 vs. wild-type.
	Protein IDs	Peptide counts (all)	Priority protein ID	logFC	CI.L	CI.R	AveExpr	P.Value	adj.P.Val	Experiment	Gene names (primary )	Gene names (synonym )	Protein name	Gene_ORFName	WormBase
	Q11183	3	Q11183	-1.61198	-1.99989	-1.22408	24.6991	4.01347e-06	0.00683494	mir-1(gk276) / N2	txdc-9	tag-170	Thioredoxin domain-containing protein 9	C05D11.3	WBGene00006515
	Q18529	4	Q18529	-1.27878	-1.61889	-0.938664	24.6784	9.55243e-06	0.0081339	mir-1(gk276) / N2			Uncharacterized protein	C39D10.7	WBGene00016534
	P34539	5	P34539	-1.13265	-1.54148	-0.723814	29.1239	0.000118455	0.0672431	mir-1(gk276) / N2			Putative ATP synthase subunit epsilon, mitochondrial	R05D3.6_ZC262.5	WBGene00019880_WBGene00022582
	Q8MNT7;Q19278	12;12	Q19278	-0.763599	-1.04979	-0.477412	28.8021	0.000158892	0.0676482	mir-1(gk276) / N2	hach-1		3-hydroxyisobutyryl-CoA hydrolase, mitochondrial	F09F7.4	WBGene00017301
	G5EBU8;G5EFT0	6;6	G5EBU8	-0.407784	-0.574674	-0.240893	26.9831	0.000310679	0.105817	mir-1(gk276) / N2			Uncharacterized protein	T12D8.9	WBGene00011736
	Q95XN6	3	Q95XN6	-2.75355	-3.95649	-1.55062	25.041	0.000502644	0.142667	mir-1(gk276) / N2	lsm-6		LSM Sm-like protein	Y71G12B.14	WBGene00003080
	Q20588	5	Q20588	0.617107	0.327822	0.906392	29.212	0.000831176	0.202213	mir-1(gk276) / N2			Translation machinery-associated protein 7 homolog	F49C12.11	WBGene00009880
	Q09450	16	Q09450	-0.395718	-0.584918	-0.206517	29.2573	0.000953747	0.203029	mir-1(gk276) / N2			Probable succinyl-CoA:3-ketoacid coenzyme A transferase, mitochondrial	C05C10.3	WBGene00007330
	Q9GYU3;Q9TXS4	4;3	Q9GYU3	0.450626	0.230912	0.670339	27.2657	0.0010916	0.206555	mir-1(gk276) / N2			Uncharacterized protein	F35F10.5	WBGene00018055
	Q27371	46	Q27371	0.293319	0.146219	0.440419	33.9541	0.00132216	0.222186	mir-1(gk276) / N2	mup-2		Troponin T	T22E5.5	WBGene00003495
	O02106	6	O02106	-0.545379	-0.824463	-0.266296	26.5446	0.00151382	0.222186	mir-1(gk276) / N2	mlt-8		Uncharacterized protein	W08F4.6	WBGene00021095
	Q20334	18	Q20334	0.777224	0.377486	1.17696	28.7602	0.00156561	0.222186	mir-1(gk276) / N2	tni-1		Troponin I 1	F42E11.4	WBGene00006584
	Q9U2M4	11	Q9U2M4	-0.371317	-0.568621	-0.174013	28.9155	0.00194052	0.254208	mir-1(gk276) / N2	hphd-1		Hydroxyacid-oxoacid transhydrogenase, mitochondrial	Y38F1A.6	WBGene00012608
	O44955	3	O44955	-0.374949	-0.576516	-0.173382	27.1276	0.00209292	0.254589	mir-1(gk276) / N2			Uncharacterized protein	C34B2.8	WBGene00016393
	H2KYQ5	8	H2KYQ5	0.517671	0.235799	0.799544	29.44	0.00227264	0.25802	mir-1(gk276) / N2	gyg-1		Glycogenin-1	F56B6.4	WBGene00006863
	Q95QI6	3	Q95QI6	1.36753	0.605074	2.12998	24.4528	0.00264234	0.281244	mir-1(gk276) / N2			Uncharacterized protein	F26F4.12	WBGene00017831
	Q21217;N1NVC4	18;13	Q21217	-0.470039	-0.735137	-0.204942	29.5949	0.00284072	0.284573	mir-1(gk276) / N2	gta-1		Probable 4-aminobutyrate aminotransferase, mitochondrial	K04D7.3	WBGene00001794
	P18947;Q9N4J2;P06125	15;14;14	P18947	-1.49976	-2.35385	-0.645669	26.8095	0.00301822	0.285557	mir-1(gk276) / N2	vit-4		Vitellogenin-4	F59D8.2	WBGene00006928
	V6CLU0;V6CLP5;V6CLT3;V6CJB8	111;110;109;109	V6CLU0	-0.264416	-0.428126	-0.100706	31.2581	0.00500538	0.425797	mir-1(gk276) / N2	ketn-1		KETtiN (Drosophila actin-binding) homolog	F54E2.3	WBGene00004130
	Q21463;Q65ZI9	2;1	Q21463	1.38118	0.519737	2.24262	24.8329	0.00522517	0.425797	mir-1(gk276) / N2	asns-2		Asparagine synthetase	M02D8.4	WBGene00019730
	Q9XU13;G5EEK8;A8WI68	27;27;26	Q9XU13	-0.539522	-0.876303	-0.202742	30.062	0.00525058	0.425797	mir-1(gk276) / N2	sca-1		Calcium-transporting ATPase	K11D9.2	WBGene00004736
	U4PM04;U4PBK4;U4PB58;U4PEF1;D0IMZ5;U4PR92;U4PM01;U4PBJ9;U4PR97;U4PM09;U4PEE8;U4PRA0;D0IMZ7;U4PEE3;D0IMZ8;U4PB53;Q9TYW4	108;108;108;108;108;108;108;108;106;106;106;106;106;106;106;106;15	D0IMZ5	-0.224211	-0.367505	-0.0809176	32.2907	0.00601691	0.4276	mir-1(gk276) / N2	fln-1		FiLamiN (Actin binding protein) homolog	Y66H1B.2	WBGene00022048
	H2L2C8;H2L2C9;Q9XVU8;Q23158	20;20;20;20	Q23158	-0.575522	-0.945568	-0.205477	28.251	0.00622833	0.4276	mir-1(gk276) / N2	atn-1		AcTiniN	W04D2.1	WBGene00000228
	Q18990	7	Q18990	-0.583136	-0.962413	-0.203858	25.425	0.00664867	0.4276	mir-1(gk276) / N2	pyr-1		CAD protein	D2085.1	WBGene00004259
	Q21215	14	Q21215	-0.725509	-1.19877	-0.25225	28.6311	0.00675922	0.4276	mir-1(gk276) / N2	rack-1		Guanine nucleotide-binding protein subunit beta-2-like 1	K04D7.1	WBGene00010556
	Q8MPS2;P19826;V6CK82;V6CJ36;V6CLL2;Q9BI31;V6CLK1;V6CLG2	31;31;29;29;11;11;4;4	P19826	0.253942	0.0880597	0.419825	30.4082	0.00681287	0.4276	mir-1(gk276) / N2	deb-1		Vinculin	ZC477.9	WBGene00000942
	P18948	24	P18948	-1.41775	-2.35658	-0.478913	28.7296	0.00735396	0.4276	mir-1(gk276) / N2	vit-6		Vitellogenin-6	K07H8.6	WBGene00006930
	U4PC51;O61199	12;12	O61199	-0.372075	-0.618888	-0.125263	28.6043	0.00742472	0.4276	mir-1(gk276) / N2	ogdh-1		2-oxoglutarate dehydrogenase, mitochondrial	T22B11.5	WBGene00020679
	X5LQ26;G5EE55;G5EFP7;G5EDM4;X5LVA5;X5MBG4;Q27GP2;I2HAI6;I2HAG6;G5EC64	23;23;23;23;23;16;16;16;16;16	G5EDM4	0.275211	0.0924432	0.457978	30.4724	0.00747216	0.4276	mir-1(gk276) / N2	nrfl-1		NHERF (Mammalian Na/H Exchange Regulatory Factor) Like	C01F6.6	WBGene00006438
	O02286;Q7JKI2;Q7JKI1;Q7JKI3	32;30;24;22	O02286	-0.471033	-0.784299	-0.157766	29.9987	0.00753259	0.4276	mir-1(gk276) / N2	pck-2		Phosphoenolypyruvate CarboxyKinase	R11A5.4	WBGene00011232
	G4SF79;Q19780	6;2	G4SF79	-0.538212	-0.902293	-0.17413	25.6642	0.00827294	0.454478	mir-1(gk276) / N2			Uncharacterized protein	F25E2.2	WBGene00017780
	Q9N3F4;Q95XY1;Q65XX1	10;10;10	Q9N3F4	-0.293278	-0.494067	-0.0924888	28.0792	0.00883246	0.467054	mir-1(gk276) / N2	vbh-1		Vasa-and Belle-like Helicase	Y54E10A.9	WBGene00006888
	G8JY38;P05690	19;19	P05690	-1.08636	-1.83347	-0.33924	28.183	0.00905037	0.467054	mir-1(gk276) / N2	vit-2		Vitellogenin-2	C42D8.2	WBGene00006926
	Q2HQL4;H8ESF5	9;7	Q2HQL4	-0.206516	-0.349774	-0.0632581	29.2266	0.00948093	0.474883	mir-1(gk276) / N2	gln-3		Glutamine synthetase	Y105C5B.28	WBGene00001604
	G5EEL1;G5EFG1;G5EFL5;G5EEF6	37;36;36;35	G5EEL1	0.363067	0.109379	0.616755	31.212	0.0098556	0.479546	mir-1(gk276) / N2	alp-1		ALP/Enigma encoding	T11B7.4	WBGene00001132
	Q18280	3	Q18280	1.49765	0.440087	2.55521	24.3058	0.0104234	0.481209	mir-1(gk276) / N2			Uncharacterized protein	C28C12.4	WBGene00016180
	Q20140	8	Q20140	-0.458159	-0.781872	-0.134446	27.9623	0.0104549	0.481209	mir-1(gk276) / N2			Adenylate kinase isoenzyme 1	F38B2.4	WBGene00009531
	Q22159	1	Q22159	1.53366	0.43913	2.62819	24.7441	0.011021	0.48725	mir-1(gk276) / N2			Uncharacterized protein	T04F3.4	WBGene00011439
	Q22018	13	Q22018	0.370888	0.105568	0.636209	28.1004	0.0111584	0.48725	mir-1(gk276) / N2	dtmk-1		Thymidylate kinase	R53.2	WBGene00011272
	P46822	18	P46822	0.313438	0.0861663	0.54071	27.8598	0.0119696	0.495739	mir-1(gk276) / N2	klc-2		Kinesin light chain	C18C4.10	WBGene00002215
	P49391	6	P49391	-0.329733	-0.571702	-0.0877635	25.8192	0.0127297	0.495739	mir-1(gk276) / N2	mrps-14		Probable 40S ribosomal protein S14, mitochondrial	T01E8.6	WBGene00011334
	G5EC98	12	G5EC98	-0.298211	-0.518486	-0.0779355	28.0438	0.0131617	0.495739	mir-1(gk276) / N2	ctps-1		CTP synthase	W06H3.3	WBGene00012316
	P50306	14	P50306	0.387388	0.100025	0.674752	28.6144	0.0134479	0.495739	mir-1(gk276) / N2	sams-4		Probable S-adenosylmethionine synthase 4	C06E7.3	WBGene00015540
	P50093	10	P50093	-0.372803	-0.650859	-0.0947468	28.5229	0.0138234	0.495739	mir-1(gk276) / N2	phb-2		Mitochondrial prohibitin complex protein 2	T24H7.1	WBGene00004015
	H2KZG6;Q8IAB6	14;5	H2KZG6	-0.408124	-0.713072	-0.103176	29.7642	0.013949	0.495739	mir-1(gk276) / N2	acdh-1		Acyl CoA DeHydrogenase	C55B7.4	WBGene00016943
	Q9U3F4	7	Q9U3F4	0.397496	0.100028	0.694963	27.9579	0.0140581	0.495739	mir-1(gk276) / N2	zyx-1		Zyxin	F42G4.3	WBGene00006999
	Q9NLD1	10	Q9NLD1	-0.250773	-0.438906	-0.0626408	27.757	0.0142338	0.495739	mir-1(gk276) / N2	hrp-2		HnRNP A1 homolog	F58D5.1	WBGene00002000
	P37806	54	P37806	0.249767	0.0613253	0.43821	34.0346	0.0146425	0.495739	mir-1(gk276) / N2	unc-87		Protein unc-87	F08B6.4	WBGene00006819
	P91303	23	P91303	0.266197	0.0644698	0.467924	33.3169	0.014968	0.495739	mir-1(gk276) / N2	vha-10		Probable V-type proton ATPase subunit G	F46F11.5	WBGene00006919
	Q7JP52;Q20660	9;9	Q20660	0.269882	0.0644189	0.475345	28.3908	0.0153132	0.495739	mir-1(gk276) / N2	hsp-17		Heat Shock Protein	F52E1.7	WBGene00002021
	Q10663	14	Q10663	-0.382779	-0.67458	-0.0909785	27.7882	0.0154143	0.495739	mir-1(gk276) / N2	icl-1	gei-7	Bifunctional glyoxylate cycle protein	C05E4.9	WBGene00001564
	Q21443	61	Q21443	0.250457	0.0589664	0.441948	32.3501	0.0156393	0.495739	mir-1(gk276) / N2	lmn-1	lam-1	Lamin-1	DY3.2	WBGene00003052
	Q8MXT6	2	Q8MXT6	-1.05621	-1.86558	-0.24684	25.0944	0.0158144	0.495739	mir-1(gk276) / N2	col-106		COLlagen	Y77E11A.15	WBGene00000680
	Q20637	2	Q20637	2.59823	0.60708	4.58937	26.1386	0.0158196	0.495739	mir-1(gk276) / N2			Uncharacterized protein	F52A8.1	WBGene00009915
	A0A168H1X0;A0A164D380	2;2	A0A164D380	-1.64788	-2.91381	-0.381943	23.9829	0.0160104	0.495739	mir-1(gk276) / N2	tbc-14		TBC (Tre-2/Bub2/Cdc16) domain family	E01G4.1	WBGene00008444
	O16298	8	O16298	0.418194	0.0921401	0.744248	32.2356	0.0172066	0.498287	mir-1(gk276) / N2	hpo-18		Uncharacterized protein	F32D1.2	WBGene00017982
	P34385	17	P34385	-0.224944	-0.40051	-0.0493782	28.7615	0.0172938	0.498287	mir-1(gk276) / N2			Probable methylcrotonoyl-CoA carboxylase beta chain, mitochondrial	F02A9.4	WBGene00008514
	Q09974	4	Q09974	-0.623351	-1.11905	-0.127653	24.7568	0.0189138	0.498287	mir-1(gk276) / N2	ttc-4		TeTratriCopeptide repeat domain protein related	C17G10.2	WBGene00015916
	Q17489	13	Q17489	-0.233619	-0.419419	-0.0478183	28.099	0.0189252	0.498287	mir-1(gk276) / N2	unc-44		Uncharacterized protein	B0350.2	WBGene00006780
	Q9NEN6;I2HAF8;I2HAF9	37;31;28	Q9NEN6	-0.269258	-0.483529	-0.0549874	33.3181	0.018978	0.498287	mir-1(gk276) / N2	rps-6		40S ribosomal protein S6	Y71A12B.1	WBGene00004475
	Q9XWI6	10	Q9XWI6	-0.283751	-0.510545	-0.0569563	29.0817	0.0193756	0.498287	mir-1(gk276) / N2	eif-3.B		Eukaryotic translation initiation factor 3 subunit B	Y54E2A.11	WBGene00001225
	Q21832	5	Q21832	0.279269	0.0559263	0.502612	28.4898	0.0194291	0.498287	mir-1(gk276) / N2	rnp-4	RBM8 Y14	RNA-binding protein 8A	R07E5.14	WBGene00004387
	O17218;A8WIR1	15;10	O17218	-0.551954	-0.996106	-0.107803	29.7799	0.0200016	0.498287	mir-1(gk276) / N2	rps-22		Ribosomal Protein, Small subunit	F53A3.3	WBGene00004491
	P48156;V6CM07	23;10	P48156	-0.439476	-0.795973	-0.0829797	32.84	0.0207682	0.498287	mir-1(gk276) / N2	rps-8		40S ribosomal protein S8	F42C5.8	WBGene00004477
	P34659	1	P34659	0.903557	0.168458	1.63866	23.6543	0.0210528	0.498287	mir-1(gk276) / N2	snr-5		Probable small nuclear ribonucleoprotein F	ZK652.1	WBGene00004918
	Q9XXR5	7	Q9XXR5	0.448373	0.0819895	0.814757	27.2197	0.0214856	0.498287	mir-1(gk276) / N2	ttr-26		TransThyretin-Related family domain	Y51A2D.11	WBGene00013079
	O01658	2	O01658	1.00365	0.183275	1.82402	24.87	0.0215161	0.498287	mir-1(gk276) / N2	jmjc-1		Bifunctional lysine-specific demethylase and histidyl-hydroxylase NO66	T28F2.4	WBGene00020902
	Q6A2D2;E3W743	42;40	Q6A2D2	0.275785	0.0493814	0.502189	30.6912	0.0219509	0.498287	mir-1(gk276) / N2	hpo-34		Uncharacterized protein	F29G6.3	WBGene00009259
	O62289	6	O62289	-0.213621	-0.389233	-0.0380085	27.8578	0.0220906	0.498287	mir-1(gk276) / N2	ttr-51		TransThyretin-Related family domain	JC8.8	WBGene00010440
	D9PTP5;D9PTP7;D9PTP6;D9PTP8	10;9;9;5	D9PTP5	0.255335	0.0453839	0.465286	26.9882	0.0221132	0.498287	mir-1(gk276) / N2	snx-6		Sorting NeXin	Y59A8B.22	WBGene00013354
	Q9N4I3	20	Q9N4I3	0.230629	0.0403529	0.420905	32.3492	0.0224578	0.498287	mir-1(gk276) / N2			Uncharacterized protein	Y71F9AL.9	WBGene00022114
	Q09364	1	Q09364	0.35844	0.0609075	0.655973	26.2934	0.0230922	0.498287	mir-1(gk276) / N2			Uncharacterized protein ZK1320.2	ZK1320.2	WBGene00014252
	G5EFZ1	3	G5EFZ1	-0.326975	-0.600174	-0.0537768	26.5614	0.0237896	0.498287	mir-1(gk276) / N2	ipgm-1		2,3-bisphosphoglycerate-independent phosphoglycerate mutase	F57B10.3	WBGene00019001
	O16405	3	O16405	-0.549409	-1.00909	-0.0897262	24.68	0.0239385	0.498287	mir-1(gk276) / N2			Uncharacterized protein	C36C5.5	WBGene00016474
	Q23500	14	Q23500	-0.516685	-0.951114	-0.082256	27.9591	0.024474	0.498287	mir-1(gk276) / N2	aco-1	gei-22	Probable cytoplasmic aconitate hydratase	ZK455.1	WBGene00000040
	Q9U263;O44498;Q95XE2	10;7;1	Q9U263	0.288362	0.0450266	0.531697	26.5109	0.0248757	0.498287	mir-1(gk276) / N2	set-26		Histone-lysine N-methyltransferase set-26	Y51H4A.12	WBGene00013106
	O44144	4	O44144	-2.47378	-4.56294	-0.384626	26.1702	0.0249637	0.498287	mir-1(gk276) / N2	perm-4		PERMeable eggshell	C44B12.5	WBGene00016638
	P49180	18	P49180	-0.284926	-0.525901	-0.0439504	31.3387	0.0251266	0.498287	mir-1(gk276) / N2	rpl-33		60S ribosomal protein L35a	F10E7.7	WBGene00004447
	P34559	34	P34559	-0.261323	-0.482338	-0.040307	33.0427	0.025128	0.498287	mir-1(gk276) / N2	ech-6		Probable enoyl-CoA hydratase, mitochondrial	T05G5.6	WBGene00001155
	B3CJ34	18	B3CJ34	-0.394719	-0.729359	-0.0600789	27.7001	0.0253993	0.498287	mir-1(gk276) / N2	gcn-1		GCN (Yeast General Control Nondrepressible) homolog	Y48G9A.3	WBGene00021697
	Q7JKP6	11	Q7JKP6	0.252232	0.0377899	0.466675	27.5881	0.0257192	0.498287	mir-1(gk276) / N2	hsr-9		Protein hsr-9	T05F1.6	WBGene00002027
	G5EEA8	9	G5EEA8	0.250673	0.0371435	0.464203	28.2113	0.0259414	0.498287	mir-1(gk276) / N2	nex-1	NEX-1	Annexin	ZC155.1	WBGene00003588
	Q17392	2	Q17392	2.44169	0.360818	4.52257	27.5136	0.0259957	0.498287	mir-1(gk276) / N2	cul-4		Cullin-4	F45E12.3	WBGene00000839
	G5EDQ2	15	G5EDQ2	0.209607	0.0305468	0.388667	28.2807	0.0262727	0.498287	mir-1(gk276) / N2	hmg-12	hmg-I-beta	HMG	Y17G7A.1	WBGene00001977
	Q7K6X4;Q9U240	11;11	Q9U240	0.298398	0.042122	0.554674	28.2378	0.0268996	0.498287	mir-1(gk276) / N2	npp-16		Nuclear Pore complex Protein	Y56A3A.17	WBGene00003802
	Q09252	1	Q09252	1.40616	0.195856	2.61646	24.8379	0.027159	0.498287	mir-1(gk276) / N2	ccdc-55		Nuclear speckle splicing regulatory protein 1 homolog	C16C10.6	WBGene00007627
	Q20621;A6ZJ46;Q8I4I4	7;7;5	Q20621	0.383758	0.0518404	0.715676	27.3032	0.0277447	0.498287	mir-1(gk276) / N2			Uncharacterized protein	F49E2.2	WBGene00009886
	Q95Y72	4	Q95Y72	0.369736	0.0495238	0.689948	27.7672	0.0279052	0.498287	mir-1(gk276) / N2	dss-1		Probable 26S proteasome complex subunit dss-1	Y119D3B.15	WBGene00022492
	O45097	12	O45097	0.278882	0.0367495	0.521014	29.0905	0.0282113	0.498287	mir-1(gk276) / N2			Uncharacterized protein	F57H12.6	WBGene00019021
	Q09462	5	Q09462	0.986111	0.129676	1.84255	25.7846	0.0282499	0.498287	mir-1(gk276) / N2			Probable U3 small nucleolar RNA-associated protein 11	C16C10.2	WBGene00007623
	Q22836	12	Q22836	0.250737	0.031294	0.470179	28.0018	0.0292068	0.498287	mir-1(gk276) / N2			Uncharacterized protein T27F2.1	T27F2.1	WBGene00004806
	Q17994;Q8MQD9	8;3	Q17994	-0.412112	-0.774958	-0.049265	27.3377	0.0299714	0.498287	mir-1(gk276) / N2	got-2.2		Aspartate aminotransferase	C14F11.1	WBGene00015778
	O45218	7	O45218	-1.30137	-2.44745	-0.155298	25.5997	0.0300019	0.498287	mir-1(gk276) / N2	ads-1		Alkyldihydroxyacetonephosphate synthase	Y50D7A.7	WBGene00000081
	O44895	8	O44895	0.22869	0.0267457	0.430634	27.0216	0.0303514	0.498287	mir-1(gk276) / N2			Uncharacterized protein	ZK484.3	WBGene00022749
	G5EBR1;Q2V4S2	6;6	Q2V4S2	-0.2737	-0.515701	-0.0316989	28.1746	0.0305188	0.498287	mir-1(gk276) / N2	gdi-1		Rab GDP dissociation inhibitor	Y57G11C.10	WBGene00001558
	Q9N3G0	19	Q9N3G0	0.306293	0.0354009	0.577186	30.5639	0.0305539	0.498287	mir-1(gk276) / N2			Uncharacterized protein	Y53G8AR.6	WBGene00021813
	P34384	6	P34384	-0.961414	-1.81455	-0.108282	24.8634	0.0309914	0.498287	mir-1(gk276) / N2			Uncharacterized protein F02A9.4b	F02A9.4	WBGene00008514
	P52713;Q7JMI1	25;2	P52713	-0.3228	-0.609424	-0.0361752	32.3192	0.0310749	0.498287	mir-1(gk276) / N2	alh-8		Probable methylmalonate-semialdehyde dehydrogenase [acylating], mitochondrial	F13D12.4	WBGene00000114
	O17271	4	O17271	-1.34753	-2.54876	-0.146306	24.611	0.0315978	0.498287	mir-1(gk276) / N2	heh-1		Putative protein heh-1	R148.6	WBGene00006452
	Q23258	3	Q23258	-1.1729	-2.21886	-0.126946	24.8778	0.031649	0.498287	mir-1(gk276) / N2			Uncharacterized protein	ZC373.2	WBGene00013867
	P30632	2	P30632	-0.367782	-0.696817	-0.0387473	26.8724	0.0320836	0.498287	mir-1(gk276) / N2	asna-1	tag-205	ATPase asna-1	ZK637.5	WBGene00014025
	O61980;Q86S24;Q5TKA9	12;11;11	O61980	0.316852	0.0331471	0.600556	28.0282	0.0321958	0.498287	mir-1(gk276) / N2	unc-23		Uncharacterized protein	H14N18.1	WBGene00006760
	G5EEP9;G5EEG8;G5EBP4;G5EFD6	19;19;18;3	G5EEG8	0.216745	0.022478	0.411012	29.2106	0.0323336	0.498287	mir-1(gk276) / N2	frm-1		FERM domain (Protein4.1-ezrin-radixin-moesin) family	ZK270.2	WBGene00001488
	Q9TZS5;Q86S29	15;13	Q9TZS5	-0.421584	-0.8008	-0.0423685	28.1789	0.0328237	0.498287	mir-1(gk276) / N2	cct-7		Chaperonin Containing TCP-1	T10B5.5	WBGene00020391
	Q95QS3	9	Q95QS3	0.249943	0.0241752	0.47571	28.5565	0.0334051	0.498287	mir-1(gk276) / N2	mrps-26		Mitochondrial Ribosomal Protein, Small	C34E10.11	WBGene00016412
	Q9N4U2	8	Q9N4U2	0.237731	0.0222653	0.453197	28.7016	0.0338811	0.498287	mir-1(gk276) / N2	col-71		COLlagen	Y49F6B.10	WBGene00000647
	Q21004	9	Q21004	0.21022	0.0188158	0.401624	26.9321	0.0345312	0.498287	mir-1(gk276) / N2	amph-1		AMPHiphysin homolog	F58G6.1	WBGene00010272
	Q9N538	2	Q9N538	-0.949232	-1.8148	-0.0836676	24.1866	0.034746	0.498287	mir-1(gk276) / N2	dhs-9		DeHydrogenases, Short chain	Y32H12A.3	WBGene00000973
	Q21233;Q8MQ11	4;2	Q21233	-1.20154	-2.30041	-0.102667	24.7679	0.0351729	0.498287	mir-1(gk276) / N2	nuo-4		NADH dehydrogenase [ubiquinone] 1 alpha subcomplex subunit 10, mitochondrial	K04G7.4	WBGene00019401
	O01685;Q86GU3	10;9	O01685	-0.31765	-0.608542	-0.0267576	28.4008	0.0353653	0.498287	mir-1(gk276) / N2			Uncharacterized protein	C32F10.8	WBGene00016333
	Q7YXD7	2	Q7YXD7	1.22063	0.101882	2.33937	24.3539	0.0354879	0.498287	mir-1(gk276) / N2			Uncharacterized protein	Y39G8B.9	WBGene00012728
	B3GWA1;Q95QI9;Q8I7K5;B3GWA0	3;2;2;1	B3GWA1	0.201601	0.0167397	0.386463	26.8271	0.035557	0.498287	mir-1(gk276) / N2	nono-1		NONO (Conserved nuclear protein, aka PSF) homolog	F25B5.7	WBGene00017778
	Q9BL76	4	Q9BL76	0.359412	0.0296035	0.689221	25.7112	0.0356637	0.498287	mir-1(gk276) / N2			Uncharacterized protein	Y48G1C.9	WBGene00021682
	Q9NEU2	4	Q9NEU2	0.249233	0.0197884	0.478678	25.7807	0.0361401	0.498287	mir-1(gk276) / N2	pro-3		Protein SDA1 homolog	Y39B6A.14	WBGene00012676
	H2KZV8;L8E6X8	12;8	H2KZV8	-0.242444	-0.465737	-0.0191507	29.8253	0.0362056	0.498287	mir-1(gk276) / N2	mlp-1		MLP/CRP family (Muscle LIM Protein/Cysteine-rich Protein)	T04C9.4	WBGene00003375
	Q8I111;P52899	13;13	P52899	-0.581185	-1.1166	-0.0457691	28.6673	0.0362441	0.498287	mir-1(gk276) / N2			Probable pyruvate dehydrogenase E1 component subunit alpha, mitochondrial	T05H10.6	WBGene00011510
	G5EGA5	1	G5EGA5	-0.716023	-1.37623	-0.0558132	23.9869	0.0363736	0.498287	mir-1(gk276) / N2	fat-2		Delta(12) fatty acid desaturase fat-2	W02A2.1	WBGene00001394
	Q9N5M2	15	Q9N5M2	0.196699	0.0152424	0.378155	29.9128	0.0364476	0.498287	mir-1(gk276) / N2	pfd-2	tag-355	Prefoldin subunit 2	H20J04.5	WBGene00019220
	Q8MXS8	7	Q8MXS8	-0.347727	-0.669132	-0.0263223	26.7348	0.036738	0.498287	mir-1(gk276) / N2			Uncharacterized protein	Y47G6A.22	WBGene00021647
	Q20770	1	Q20770	1.49425	0.111715	2.87678	24.6993	0.0368898	0.498287	mir-1(gk276) / N2			Uncharacterized protein	F54D5.4	WBGene00010050
	Q17522	4	Q17522	0.417414	0.0307729	0.804054	27.1941	0.0370593	0.498287	mir-1(gk276) / N2	valv-1		Uncharacterized protein	B0496.7	WBGene00015216
	P91871	17	P91871	-0.453506	-0.873617	-0.0333951	27.8475	0.0370731	0.498287	mir-1(gk276) / N2	fasn-1		Fatty Acid SyNthase	F32H2.5	WBGene00009342
	Q21559	23	Q21559	0.317508	0.0233241	0.611692	30.0089	0.0371021	0.498287	mir-1(gk276) / N2	aly-3		Ref/ALY RNA export adaptor family	M18.7	WBGene00000122
	Q9N5X9	3	Q9N5X9	0.508237	0.0366955	0.979779	25.1304	0.0373076	0.498287	mir-1(gk276) / N2			Uncharacterized protein	C15F1.2	WBGene00015795
	P34576	57	P34576	0.196156	0.0138385	0.378473	29.9144	0.0375785	0.498287	mir-1(gk276) / N2	mua-3		Transmembrane cell adhesion receptor mua-3	K08E5.3	WBGene00003482
	Q23312	22	Q23312	-0.48221	-0.930944	-0.0334758	31.0545	0.0377636	0.498287	mir-1(gk276) / N2	rps-7		40S ribosomal protein S7	ZC434.2	WBGene00004476
	Q22336	7	Q22336	-0.235107	-0.455508	-0.0147052	28.1728	0.038903	0.498287	mir-1(gk276) / N2	spp-3		SaPosin-like Protein family	T08A9.7	WBGene00004988
	Q09531	25	Q09531	0.208216	0.0125901	0.403841	29.5198	0.039251	0.498287	mir-1(gk276) / N2			Uncharacterized protein F07F6.4	F07F6.4	WBGene00017217
	G5EEH6	4	G5EEH6	-0.874094	-1.69583	-0.0523624	24.6715	0.0393453	0.498287	mir-1(gk276) / N2	ivd-1		Isovaleryl-CoA dehydrogenase	C02B10.1	WBGene00015326
	O17732;H2L2E4	13;8	O17732	-0.459525	-0.89302	-0.0260296	26.8182	0.0398943	0.498287	mir-1(gk276) / N2	pyc-1		Pyruvate carboxylase 1	D2023.2	WBGene00004258
	Q9BIC0;X5M5Q5;X5LPU4;M1ZJY5;X5M8U5;X5LX70;A0A2C9C357;Q9BIC1;Q86NJ4;X5M8V1;X5LX73;X5LV54;X5M5P8;Q86NJ3;X5LPT9	4;4;4;4;4;4;4;4;4;2;2;2;2;2;2	Q9BIC0	0.24212	0.012467	0.471774	24.2857	0.0407697	0.498287	mir-1(gk276) / N2	afd-1		AFaDin (Actin filament binding protein) homolog	W03F11.6	WBGene00021009
	Q20228	14	Q20228	-0.536858	-1.04706	-0.0266543	30.1404	0.0410849	0.498287	mir-1(gk276) / N2	rps-9		40S ribosomal protein S9	F40F8.10	WBGene00004478
	Q9TZ93	2	Q9TZ93	1.39273	0.0650504	2.72042	25.5679	0.0415905	0.498287	mir-1(gk276) / N2	spt-4		Transcription elongation factor SPT4	F54C4.2	WBGene00005014
	Q9N5Y2	2	Q9N5Y2	-1.00819	-1.97051	-0.0458723	24.492	0.0417988	0.498287	mir-1(gk276) / N2	art-1		Probable very-long-chain enoyl-CoA reductase art-1	C15F1.6	WBGene00000198
	Q17993	5	Q17993	-0.326372	-0.637922	-0.0148216	26.8371	0.0418138	0.498287	mir-1(gk276) / N2			Uncharacterized protein	C14F11.6	WBGene00015781
	Q9NAF9	7	Q9NAF9	0.446161	0.0197583	0.872563	28.0184	0.0420089	0.498287	mir-1(gk276) / N2	pinn-4		Peptidyl-prolyl cis-trans isomerase	Y48C3A.16	WBGene00012996
	Q7Z1Q2;Q7Z1Q3	7;7	Q7Z1Q2	-0.910492	-1.78247	-0.0385124	25.8746	0.0423537	0.498287	mir-1(gk276) / N2	alh-12		ALdehyde deHydrogenase	Y69F12A.2	WBGene00000118
	Q1ZXT0;G5ECA2	1;1	Q1ZXT0	0.255555	0.0108068	0.500304	26.2371	0.0423556	0.498287	mir-1(gk276) / N2			Uncharacterized protein	F29C6.1	WBGene00009243
	P55326	14	P55326	0.196559	0.00825927	0.384859	30.1714	0.0424022	0.498287	mir-1(gk276) / N2			Uncharacterized protein F13E6.1	F13E6.1	WBGene00008745
	P91253	2	P91253	-0.781758	-1.53343	-0.0300883	24.4641	0.0430186	0.498287	mir-1(gk276) / N2	gst-7		Probable glutathione S-transferase 7	F11G11.2	WBGene00001755
	Q9NEW6	24	Q9NEW6	0.169043	0.00644166	0.331645	31.8225	0.0430854	0.498287	mir-1(gk276) / N2	rsp-3		Probable splicing factor, arginine/serine-rich 3	Y111B2A.18	WBGene00004700
	A0A131MBU3	5	A0A131MBU3	0.24905	0.00930833	0.488792	26.9135	0.0432137	0.498287	mir-1(gk276) / N2	irg-7	drd-2 upr-1	Protein irg-7	F40F4.6	WBGene00018237
	Q95Y90	11	Q95Y90	-0.315025	-0.619001	-0.0110479	29.8019	0.0436192	0.498287	mir-1(gk276) / N2	rpl-9		60S ribosomal protein L9	R13A5.8	WBGene00004420
	Q966M4	3	Q966M4	0.932095	0.0320747	1.83212	25.1703	0.0437353	0.498287	mir-1(gk276) / N2	uri-1		URI (Unconventional prefoldin RPB5 Interactor) homolog	C55B7.5	WBGene00016944
	O62337	5	O62337	0.400445	0.0132025	0.787688	32.6804	0.0439901	0.498287	mir-1(gk276) / N2			Uncharacterized protein	R06C1.4	WBGene00011059
	Q17435	11	Q17435	0.270666	0.00862596	0.532705	28.9689	0.044185	0.498287	mir-1(gk276) / N2	pfd-4	tag-317	Probable prefoldin subunit 4	B0035.4	WBGene00007107
	P55216	6	P55216	-0.227083	-0.447045	-0.00712132	27.4933	0.0442754	0.498287	mir-1(gk276) / N2	cth-2		Putative cystathionine gamma-lyase 2	ZK1127.10	WBGene00022856
	A0A0K3ARB5	40	A0A0K3ARB5	-0.196376	-0.386811	-0.00594038	29.9971	0.0444726	0.498287	mir-1(gk276) / N2	lev-11		Uncharacterized protein	Y105E8B.1	WBGene00002978
	Q20677	7	Q20677	0.348166	0.0103792	0.685953	27.1412	0.0445507	0.498287	mir-1(gk276) / N2	wrt-2		WaRThog (Hedgehog-like family)	F52E4.6	WBGene00006948
	P34453	4	P34453	-0.879727	-1.73804	-0.0214183	24.9749	0.0455283	0.498287	mir-1(gk276) / N2	prx-19		Putative peroxisomal biogenesis factor 19	F54F2.8	WBGene00004201
	Q93244	7	Q93244	-0.807896	-1.597	-0.0187907	25.7828	0.045724	0.498287	mir-1(gk276) / N2	cysl-1		Cysteine synthase 1	C17G1.7	WBGene00007653
	Q95XU6	5	Q95XU6	0.696035	0.0161711	1.3759	25.6142	0.0457287	0.498287	mir-1(gk276) / N2	sut-2		Zinc finger CCCH domain-containing protein 14	Y61A9LA.8	WBGene00022019
	Q8WQF1;Q20676	9;9	Q20676	-0.326004	-0.64447	-0.00753757	26.9705	0.0457489	0.498287	mir-1(gk276) / N2	pccb-1		Propionyl Coenzyme A Carboxylase Beta subunit	F52E4.1	WBGene00018701
	O02158	9	O02158	-0.187873	-0.37174	-0.00400658	27.5234	0.0460728	0.498287	mir-1(gk276) / N2			Uncharacterized protein	T09B4.8	WBGene00020382
	Q09533	42	Q09533	-0.177621	-0.352575	-0.00266764	33.9075	0.0472194	0.498287	mir-1(gk276) / N2	rpl-10		60S ribosomal protein L10	F10B5.1	WBGene00004421
	G4SLH0;A0A2I2LDV7;A0A2I2LG13;A0A2I2LDX0;A0A2I2LG61;A0A2I2LDV8;A0A2I2LDW1;A0A2I2LDV4	41;40;38;2;2;2;2;1	G4SLH0	-0.279581	-0.555173	-0.0039882	30.4012	0.0473572	0.498287	mir-1(gk276) / N2	ttn-1		Titin homolog	W06H8.8	WBGene00006436
	G5EEI4	4	G5EEI4	-0.27605	-0.548349	-0.00375138	27.9114	0.0474809	0.498287	mir-1(gk276) / N2	asp-1		ASpartyl Protease	Y39B6A.20	WBGene00000214
	O76672	3	O76672	-0.5039	-1.00121	-0.00659054	27.0001	0.0475745	0.498287	mir-1(gk276) / N2			Uncharacterized protein	H34I24.2	WBGene00019261
	O17536	12	O17536	0.265525	0.00212498	0.528924	29.3063	0.0485095	0.498287	mir-1(gk276) / N2	hil-4		Histone H1.4	C18G1.5	WBGene00001855
	O61848;H2KZW1	21;10	O61848	0.229909	0.00144938	0.458369	30.1618	0.0488242	0.498287	mir-1(gk276) / N2			Uncharacterized protein	K03E5.2	WBGene00019361
	O44159	2	O44159	-1.08541	-2.16556	-0.00526005	24.4282	0.0490951	0.498287	mir-1(gk276) / N2			Uncharacterized protein	CD4.3	WBGene00016989
	P34455	36	P34455	-0.195722	-0.390659	-0.000784462	31.8178	0.049251	0.498287	mir-1(gk276) / N2	aco-2		Probable aconitate hydratase, mitochondrial	F54H12.1	WBGene00000041
	Q94272	8	Q94272	-0.234971	-0.469025	-0.000918117	28.0893	0.0492698	0.498287	mir-1(gk276) / N2	fah-1		FumarylAcetoacetate Hydrolase	K10C2.4	WBGene00019620
	Q17361	8	Q17361	-0.750566	-1.49835	-0.00277769	24.905	0.0493083	0.498287	mir-1(gk276) / N2	usp-14	tgt-1	Ubiquitin carboxyl-terminal hydrolase 14	C13B4.2	WBGene00006856
	O17780	1	O17780	1.34551	0.00283337	2.68819	26.8311	0.0496059	0.498287	mir-1(gk276) / N2			Uncharacterized protein	F10D11.4	WBGene00008650
	P52652	11	P52652	0.177743	0.000210406	0.355276	27.3736	0.0497783	0.498287	mir-1(gk276) / N2			Putative transcription elongation factor S-II	T24H10.1	WBGene00012000
	G5EFE3	6	G5EFE3	0.41524	0.000468013	0.830013	30.0155	0.0497889	0.498287	mir-1(gk276) / N2			Uncharacterized protein	H03A11.2	WBGene00010357
	Q95PX0;Q95PW9	4;4	Q95PW9	-1.41447	-2.8283	-0.000647151	25.2028	0.0499143	0.498287	mir-1(gk276) / N2	nck-1		NCK (Non-Catalytic region of tyrosine Kinase) adaptor protein family	ZK470.5	WBGene00006410
	G5EEH9	23	G5EEH9	0.165275	-1.41067e-05	0.330564	28.5801	0.050016	0.498287	mir-1(gk276) / N2	npp-10		Nuclear pore complex protein Nup98-Nup96	ZK328.5	WBGene00003796
	Q22412;A0A061ACS6	10;3	Q22412	0.202945	-4.57786e-05	0.405936	27.6425	0.0500423	0.498287	mir-1(gk276) / N2	rbm-22		RNA Binding Motif protein homolog	T11G6.8	WBGene00011722
	O61880	12	O61880	0.241785	-0.000402424	0.483972	31.0024	0.0503125	0.498287	mir-1(gk276) / N2			Uncharacterized protein	F59B1.2	WBGene00019097
	G5EBJ7	5	G5EBJ7	-0.218596	-0.437571	0.000379632	28.3519	0.0503261	0.498287	mir-1(gk276) / N2	fbp-1	fbp	Fructose-1,6-BiPhosphatase	K07A3.1	WBGene00001404
	Q95ZI4	17	Q95ZI4	0.205271	-0.000991125	0.411534	29.3046	0.0509088	0.501143	mir-1(gk276) / N2	lec-3		Galectin	ZK892.1	WBGene00002266
	Q27245	11	Q27245	-0.319899	-0.642147	0.00234862	27.2935	0.0513847	0.502429	mir-1(gk276) / N2	lap-2		Putative aminopeptidase W07G4.4	W07G4.4	WBGene00002250
	Q17935;Q2XMZ9;Q17936	23;22;22	Q17935	0.233041	-0.00201134	0.468093	29.3225	0.0516295	0.502429	mir-1(gk276) / N2	fubl-1	fubp-3.1	FUBp (FUBP) Like	C12D8.1	WBGene00007534
	Q10454	40	Q10454	-0.237452	-0.478128	0.00322307	34.104	0.0525728	0.508702	mir-1(gk276) / N2			Probable arginine kinase F46H5.3	F46H5.3	WBGene00018519
	Q9TYW1	3	Q9TYW1	1.36071	-0.0230731	2.7445	26.2288	0.0532227	0.512081	mir-1(gk276) / N2	vha-19		Vacuolar H ATPase	Y55H10A.1	WBGene00021952
	G5EEQ8	7	G5EEQ8	-1.40038	-2.83298	0.0322215	26.0181	0.0543938	0.514125	mir-1(gk276) / N2	sftb-1		Splicing Factor ThreeB (3b) Subunit homolog	T08A11.2	WBGene00011605
	P41994	8	P41994	0.366046	-0.00848463	0.740577	27.429	0.0544268	0.514125	mir-1(gk276) / N2	rpia-1		Probable-ribose 5-phosphate isomerase	B0280.3	WBGene00015101
	P46769	18	P46769	-0.302367	-0.611752	0.00701799	31.6714	0.0544329	0.514125	mir-1(gk276) / N2	rps-0		40S ribosomal protein SA	B0393.1	WBGene00004469
	Q19162	14	Q19162	-0.249238	-0.50453	0.00605373	30.1594	0.0546428	0.514125	mir-1(gk276) / N2	rpl-11.2		60S ribosomal protein L11-2	F07D10.1	WBGene00004423
	Q9N350	8	Q9N350	0.291212	-0.00921256	0.591636	28.2133	0.0560812	0.523367	mir-1(gk276) / N2			Uncharacterized protein	Y55F3BR.6	WBGene00021943
	P54216	18	P54216	-0.502317	-1.02093	0.016295	30.0368	0.0562397	0.523367	mir-1(gk276) / N2	aldo-1		Fructose-bisphosphate aldolase 1	T05D4.1	WBGene00011474
	Q20330	16	Q20330	0.237313	-0.00877537	0.483402	27.8529	0.0571371	0.528828	mir-1(gk276) / N2	ifo-1	ttm-4	Intermediate Filament Organize	F42C5.10	WBGene00018350
	O18218;O62486	6;6	O18218	0.383593	-0.0164036	0.783589	27.0482	0.0582893	0.530575	mir-1(gk276) / N2	nos-3		NanOS related	Y53C12B.3	WBGene00003785
	Q95X83	4	Q95X83	-1.42464	-2.9114	0.0621235	25.2722	0.0584581	0.530575	mir-1(gk276) / N2	rpoa-49		RNA POlymerase I (A) subunit	F23F1.9	WBGene00017749
	P83351	6	P83351	1.19529	-0.0525523	2.44314	25.8078	0.0585301	0.530575	mir-1(gk276) / N2	snap-29		Soluble NSF attachment protein 29	K02D10.5	WBGene00019305
	Q95PX8;Q95PX7;Q86MP0;Q95PX9;Q23398;Q86MN9	16;16;14;14;9;2	Q95PX7	0.168798	-0.00779586	0.345392	28.4616	0.0589752	0.530575	mir-1(gk276) / N2	tcer-1		TransCription Elongation Regulator homolog	ZK1127.9	WBGene00022855
	Q75MI6	10	Q75MI6	0.251055	-0.0125294	0.51464	30.0007	0.059725	0.530575	mir-1(gk276) / N2			Uncharacterized protein	Y94H6A.10	WBGene00022382
	Q21080	3	Q21080	-1.21107	-2.48594	0.0638113	24.1982	0.0602881	0.530575	mir-1(gk276) / N2			Uncharacterized protein	K01C8.1	WBGene00010456
	P52013	22	P52013	0.251525	-0.0139788	0.51703	32.5596	0.0608742	0.530575	mir-1(gk276) / N2	cyn-5	cyp-5	Peptidyl-prolyl cis-trans isomerase 5	F31C3.1	WBGene00000881
	O76743	12	O76743	0.268622	-0.0156903	0.552934	26.9311	0.0614519	0.530575	mir-1(gk276) / N2	glh-4		ATP-dependent RNA helicase glh-4	T12F5.3	WBGene00001601
	Q8MNX1;A0A0K3AV58	4;3	Q8MNX1	1.05593	-0.0642679	2.17614	24.8083	0.0619537	0.530575	mir-1(gk276) / N2			Uncharacterized protein	T22H9.1	WBGene00020705
	Q9N4D8	4	Q9N4D8	0.333629	-0.0216366	0.688895	26.6584	0.062773	0.530575	mir-1(gk276) / N2	nlp-40		Neuropeptide-like peptides nlp-40	Y74C9A.2	WBGene00022276
	Q9TXR7;H2L085	2;1	Q9TXR7	-0.554757	-1.14571	0.0361971	25.23	0.0628546	0.530575	mir-1(gk276) / N2			Uncharacterized protein	F56B3.11	WBGene00018934
	P12844	145	P12844	0.159377	-0.0104163	0.32917	33.3681	0.0628768	0.530575	mir-1(gk276) / N2	myo-3	mhcA	Myosin-3	K12F2.1	WBGene00003515
	Q20065	6	Q20065	-0.243835	-0.503898	0.0162282	26.3926	0.0631238	0.530575	mir-1(gk276) / N2	phy-2		Prolyl 4-hydroxylase subunit alpha-2	F35G2.4	WBGene00004025
	Q9XWP0	4	Q9XWP0	0.218407	-0.0158649	0.452678	26.9767	0.0643843	0.530575	mir-1(gk276) / N2	mrps-28		Mitochondrial Ribosomal Protein, Small	Y43F8C.8	WBGene00012830
	Q9GZE9	2	Q9GZE9	-1.06312	-2.20365	0.077408	25.182	0.0644203	0.530575	mir-1(gk276) / N2	ldp-1		Lipid droplet localized protein	F22F7.1	WBGene00017719
	Q9GYK2	7	Q9GYK2	-0.805338	-1.6698	0.0591251	25.6711	0.064546	0.530575	mir-1(gk276) / N2			Uncharacterized integrin beta-like protein C05D9.3	C05D9.3	WBGene00015472
	G5EEN1;G5ECI8	3;3	G5ECI8	0.475522	-0.0349558	0.986	23.8326	0.0645655	0.530575	mir-1(gk276) / N2	fars-2	frs-2	Mitochondrial phenylalanyl-tRNA synthetase	Y60A3A.13	WBGene00013361
	Q93233	4	Q93233	0.425934	-0.0319422	0.88381	28.0495	0.0648744	0.530575	mir-1(gk276) / N2	pabp-2		PolyA Binding Protein (Nuclear)	C17E4.5	WBGene00003904
	Q19057	11	Q19057	-0.329374	-0.683676	0.0249274	27.7994	0.0650179	0.530575	mir-1(gk276) / N2	acdh-12		Acyl CoA DeHydrogenase	E04F6.5	WBGene00017125
	Q93930	2	Q93930	-0.653762	-1.35702	0.0494932	24.032	0.0650229	0.530575	mir-1(gk276) / N2	prx-14		PeRoXisome assembly factor	R07H5.1	WBGene00004199
	H2L0I3;H2L0I2;Q45EJ8;H2L0I4	41;41;36;3	H2L0I2	0.324044	-0.0253053	0.673393	29.0787	0.0655218	0.530575	mir-1(gk276) / N2	lfi-1		Lin-5 (Five) Interacting protein	ZC8.4	WBGene00022500
	G5EFC4	11	G5EFC4	0.209687	-0.0165108	0.435885	27.3848	0.0656574	0.530575	mir-1(gk276) / N2	cdc-5l	cdc-5L	Cell Division Cycle related	D1081.8	WBGene00008386
	E3W741;Q18878	3;3	Q18878	0.231964	-0.0183525	0.48228	28.5715	0.0657367	0.530575	mir-1(gk276) / N2	ttr-44		TransThyretin-Related family domain	C56A3.2	WBGene00008341
	Q9TYV5;A0A0M7RDQ9	18;10	Q9TYV5	-0.377254	-0.784531	0.0300221	28.8726	0.0658336	0.530575	mir-1(gk276) / N2	nol-2		NucleOLar protein	W07E6.1	WBGene00021073
	Q21793	19	Q21793	0.289595	-0.0237365	0.602926	29.3304	0.0663341	0.530575	mir-1(gk276) / N2	pqn-53		Prion-like-(Q/N-rich)-domain-bearing protein	R07B7.3	WBGene00004138
	Q9N3X2	34	Q9N3X2	-0.41951	-0.873876	0.0348558	32.2088	0.0665703	0.530575	mir-1(gk276) / N2	rps-4		40S ribosomal protein S4	Y43B11AR.4	WBGene00004473
	O61741	4	O61741	-0.467449	-0.973939	0.0390411	24.7045	0.0666614	0.530575	mir-1(gk276) / N2			Uncharacterized protein	B0205.6	WBGene00015021
	Q1XFY9	18	Q1XFY9	-0.263162	-0.548413	0.0220894	30.3572	0.0667497	0.530575	mir-1(gk276) / N2	rps-24		Ribosomal Protein, Small subunit	T07A9.11	WBGene00004493
	O45430	20	O45430	-0.286392	-0.598146	0.0253627	28.7166	0.0677262	0.530575	mir-1(gk276) / N2	mccc-1		MethylCrotonoyl-Coenzyme A Carboxylase (Alpha)	F32B6.2	WBGene00009319
	Q9GRY9;E0R7K7	13;7	Q9GRY9	0.256188	-0.0231048	0.53548	29.2088	0.0680713	0.530575	mir-1(gk276) / N2	nova-1		NOVA kh (KH) homology domain homolog	Y59A8B.10	WBGene00013347
	Q18803	6	Q18803	-0.264602	-0.553308	0.0241042	28.6353	0.0682644	0.530575	mir-1(gk276) / N2	asg-2		Probable ATP synthase subunit g 2, mitochondrial	C53B7.4	WBGene00000210
	E9RKC7	4	E9RKC7	0.217818	-0.0204092	0.456045	26.6355	0.0688182	0.530575	mir-1(gk276) / N2			Uncharacterized protein	Y95B8A.8	WBGene00022388
	O17836;Q3S1I8;B7WNA0;Q7JL40;O17835	22;20;20;18;18	O17836	-0.210312	-0.440737	0.020112	29.905	0.0692301	0.530575	mir-1(gk276) / N2	pyk-1		Pyruvate kinase	F25H5.3	WBGene00009126
	O44782	14	O44782	-0.196389	-0.411606	0.0188273	29.4189	0.0692809	0.530575	mir-1(gk276) / N2	vpr-1		Major sperm protein	F33D11.11	WBGene00018008
	G5EE67	3	G5EE67	0.91698	-0.088473	1.92243	25.6627	0.0694126	0.530575	mir-1(gk276) / N2	skr-3		SKR-3	F44G3.6	WBGene00004809
	Q95Y93	7	Q95Y93	0.308755	-0.0311226	0.648632	27.4183	0.0703377	0.530575	mir-1(gk276) / N2	ttr-8		TransThyretin-Related family domain	R13A5.6	WBGene00020049
	Q17827	13	Q17827	0.324798	-0.0331406	0.682737	29.4508	0.0706029	0.530575	mir-1(gk276) / N2	pfd-1		Probable prefoldin subunit 1	C08F8.1	WBGene00007443
	Q09543	10	Q09543	-0.233314	-0.490537	0.0239098	28.5759	0.0706986	0.530575	mir-1(gk276) / N2	paa-1		Probable serine/threonine-protein phosphatase PP2A regulatory subunit	F48E8.5	WBGene00003901
	P47991	37	P47991	-0.29065	-0.611155	0.0298543	33.2884	0.0707495	0.530575	mir-1(gk276) / N2	rpl-6		60S ribosomal protein L6	R151.3	WBGene00004417
	O45865;G3MU69;G5EFW8;G5EFU2	23;8;7;7	O45865	-0.415132	-0.875257	0.0449928	31.7606	0.0719728	0.530575	mir-1(gk276) / N2	ant-1.1		Adenine Nucleotide Translocator	T27E9.1	WBGene00006439
	O61742	10	O61742	-0.19894	-0.419577	0.0216973	28.5023	0.0721207	0.530575	mir-1(gk276) / N2	rpn-10		26S proteasome non-ATPase regulatory subunit 4	B0205.3	WBGene00004466
	Q9U2K8	8	Q9U2K8	-0.243087	-0.512801	0.0266263	27.8156	0.0722223	0.530575	mir-1(gk276) / N2	abce-1		ABC transporter, class E	Y39E4B.1	WBGene00012714
	F5GUH1;F5GUG6;F5GUH2;F5GUG8;F5GUG7	2;2;2;1;1	F5GUG6	0.902118	-0.0990722	1.90331	24.5318	0.0722848	0.530575	mir-1(gk276) / N2			Uncharacterized protein	W05B5.1	WBGene00012274
	Q93636;K8FDY0	41;41	Q93636	0.310826	-0.0342141	0.655866	28.4489	0.0723397	0.530575	mir-1(gk276) / N2	hpo-34		Uncharacterized protein	F29G6.3	WBGene00009259
	Q9GZI3;H2L0M0;Q7KQ29	11;10;2	Q9GZI3	-0.215257	-0.454398	0.0238836	26.6517	0.0725305	0.530575	mir-1(gk276) / N2	pod-2		Uncharacterized protein	W09B6.1	WBGene00004076
	Q22285	5	Q22285	0.393746	-0.0465405	0.834032	28.3943	0.0741095	0.530575	mir-1(gk276) / N2	ttr-46		Transthyretin-like protein 46	T07C12.7	WBGene00011571
	P52011	14	P52011	0.160981	-0.0193136	0.341276	30.4151	0.074498	0.530575	mir-1(gk276) / N2	cyn-3	cyp-3	Peptidyl-prolyl cis-trans isomerase 3	Y75B12B.5	WBGene00000879
	G5EGK8	1	G5EGK8	-0.591248	-1.25436	0.0718585	25.7789	0.0748407	0.530575	mir-1(gk276) / N2	let-92		Serine/threonine-protein phosphatase 2A catalytic subunit	F38H4.9	WBGene00002363
	Q17761	10	Q17761	-0.370417	-0.788195	0.0473612	27.6819	0.0762326	0.530575	mir-1(gk276) / N2			6-phosphogluconate dehydrogenase, decarboxylating	T25B9.9	WBGene00012015
	O62246	4	O62246	-0.341166	-0.726937	0.0446042	26.737	0.0768698	0.530575	mir-1(gk276) / N2	cope-1		Coatomer subunit epsilon	F45G2.4	WBGene00009732
	P91127	16	P91127	0.167024	-0.0222232	0.356271	28.8402	0.0773827	0.530575	mir-1(gk276) / N2	tppp-1		Tubulin polymerization-promoting protein homolog	C32E8.3	WBGene00016321
	O17406	11	O17406	0.264117	-0.0351441	0.563379	29.8649	0.0773846	0.530575	mir-1(gk276) / N2	attf-2		AT hook Transcription Factor family	F09G2.9	WBGene00017317
	Q9N393	2	Q9N393	-0.252123	-0.538185	0.033939	25.6733	0.0777289	0.530575	mir-1(gk276) / N2			Uncharacterized protein	Y54H5A.1	WBGene00021899
	H2FLK8;H2FLL1;G5EEF0;H2FLL0;H2FLK3;H2FLK5;G5EFU3;H2FLK4;G5EBW6;F5GUH5	47;46;42;42;28;27;23;23;18;13	H2FLK8	0.195611	-0.0268733	0.418096	30.6861	0.078345	0.530575	mir-1(gk276) / N2	lea-1		Plant Late Embryo Abundant (LEA) related	K08H10.1	WBGene00002263
	Q8MQ91;G5ECP8;G5ECN6	4;4;4	Q8MQ91	-0.353609	-0.756287	0.0490694	26.8326	0.078654	0.530575	mir-1(gk276) / N2	nspc-18		Nematode Specific Peptide family, group C	D1025.7	WBGene00008358
	P27604	44	P27604	-0.287024	-0.614116	0.0400669	34.382	0.0788385	0.530575	mir-1(gk276) / N2	ahcy-1	ahh dpy-14	Adenosylhomocysteinase	K02F2.2	WBGene00019322
	G5EBZ4	5	G5EBZ4	-0.445556	-0.953755	0.0626432	25.8259	0.0790622	0.530575	mir-1(gk276) / N2	let-418	evl-11	Protein let-418	F26F12.7	WBGene00002637
	Q9BI71	10	Q9BI71	0.27897	-0.0392604	0.597201	28.2568	0.079093	0.530575	mir-1(gk276) / N2	epn-1		EPsiN (Endocytic protein) homolog	T04C10.2	WBGene00001329
	Q21986	4	Q21986	0.354211	-0.0519226	0.760345	26.0414	0.0804047	0.530575	mir-1(gk276) / N2	cra-1		N-terminal acetyltransferase B complex subunit NAA25 homolog	R13F6.10	WBGene00020068
	Q9XV52	6	Q9XV52	-0.360033	-0.773126	0.0530596	28.2026	0.0805818	0.530575	mir-1(gk276) / N2	gfm-1		Elongation factor G, mitochondrial	F29C12.4	WBGene00009246
	Q94300;A0A131MBQ6	13;2	Q94300	-0.175599	-0.377351	0.0261528	28.7998	0.0809329	0.530575	mir-1(gk276) / N2	rpl-11.1		60S ribosomal protein L11-1	T22F3.4	WBGene00004422
	Q19246	14	Q19246	-0.182065	-0.391434	0.0273051	30.1092	0.0811672	0.530575	mir-1(gk276) / N2	dhs-25		DeHydrogenases, Short chain	F09E10.3	WBGene00000988
	Q86LS6;Q21962	10;10	Q21962	-0.341767	-0.737397	0.0538627	27.0701	0.0828915	0.530575	mir-1(gk276) / N2	gldc-1		Glycine cleavage system P protein	R12C12.1	WBGene00020022
	Q9BL15;V6CLP2;V6CJ77;V6CLJ9	4;3;1;1	Q9BL15	-0.302044	-0.651764	0.0476754	25.7677	0.0829463	0.530575	mir-1(gk276) / N2			Uncharacterized protein	Y48G8AL.5	WBGene00021686
	Q27485;J7S164;J7SA65;P09588	9;9;9;9	P09588	0.548574	-0.0872771	1.18443	30.8494	0.0832313	0.530575	mir-1(gk276) / N2	his-3; his-7; his-12; his-16; his-19; his-21; his-30; his-33; his-43; his-47; his-51; his-53; his-57; his-61; his-65; his-68		Histone H2A	T10C6.12_F45F2.4_ZK131.6_ZK131.10_K06C4.11_K06C4.3_F35H10.1_F17E9.13_F08G2.2_B0035.7_F07B7.10_F07B7.3_F54E12.5_F55G1.10_H02I12.7_T23D8.6	WBGene00001921_WBGene00001925_WBGene00001927_WBGene00001917_WBGene00001907_WBGene00001904_WBGene00001881_WBGene00001931_WBGene00001935_WBGene00001939_WBGene00001893_WBGene00001895_WBGene00001877_WBGene00001942_WBGene00001890_WBGene00001886
	Q9BL61;O44781;V6CJF0	5;5;2	O44781	-0.215444	-0.465235	0.0343479	27.4043	0.0833064	0.530575	mir-1(gk276) / N2			Uncharacterized protein	F33D11.10	WBGene00018007
	O18154	7	O18154	-0.331075	-0.71511	0.05296	28.202	0.083428	0.530575	mir-1(gk276) / N2	tba-7		Tubulin alpha chain	T28D6.2	WBGene00006533
	P34388	5	P34388	-0.854163	-1.84555	0.137226	24.6284	0.0835852	0.530575	mir-1(gk276) / N2	mrps-9		Probable 40S ribosomal protein S9, mitochondrial	F09G8.3	WBGene00017319
	G5ECE5;P50880;G5EEC0	37;37;31	P50880	-0.28622	-0.618489	0.0460493	33.0515	0.0836382	0.530575	mir-1(gk276) / N2	rpl-3		60S ribosomal protein L3	F13B10.2	WBGene00004414
	O16520	5	O16520	-0.266206	-0.576459	0.0440465	25.9227	0.0846801	0.530575	mir-1(gk276) / N2	erfa-1	etf-1	Eukaryotic peptide chain release factor subunit 1	T05H4.6	WBGene00020269
	Q7JLZ9;Q22719	6;6	Q22719	0.408547	-0.068118	0.885212	30.9997	0.0849708	0.530575	mir-1(gk276) / N2			Uncharacterized protein	T24B8.3	WBGene00011977
	P30651	5	P30651	0.539942	-0.0922165	1.1721	25.48	0.0858996	0.530575	mir-1(gk276) / N2			Uncharacterized protein ZK643.5	ZK643.5	WBGene00014036
	Q4TT88	6	Q4TT88	-0.364024	-0.790598	0.062549	26.3011	0.0861374	0.530575	mir-1(gk276) / N2	pam-1		Puromycin-sensitive aminopeptidase	F49E8.3	WBGene00003914
	H2L0S5;Q3V5J3	6;5	H2L0S5	0.58024	-0.101662	1.26214	25.2212	0.0869141	0.530575	mir-1(gk276) / N2			Uncharacterized protein	Y71H2AM.15	WBGene00022180
	Q9U1W1	10	Q9U1W1	0.239647	-0.0423487	0.521642	29.7798	0.0872609	0.530575	mir-1(gk276) / N2	tfg-1		TFG related	Y63D3A.5	WBGene00006565
	Q8MXJ1;L8E6J9	34;31	Q8MXJ1	0.202504	-0.035792	0.440799	31.4129	0.087269	0.530575	mir-1(gk276) / N2			Uncharacterized protein	T23E7.2	WBGene00020732
	Q9U2V9;H1UBK1;H1UBK2;P90883;P50581	7;7;3;2;2	Q9U2V9	-0.354871	-0.773506	0.0637648	26.7536	0.0879463	0.530575	mir-1(gk276) / N2	map-2		Methionine aminopeptidase 2	Y116A8A.9	WBGene00003130
	Q9XUN9	14	Q9XUN9	0.160657	-0.0295477	0.350861	29.515	0.0889253	0.530575	mir-1(gk276) / N2	tni-3		Troponin I 3	T20B3.2	WBGene00006585
	H2FLF4;P34640	1;1	P34640	0.168468	-0.0310446	0.367982	26.1926	0.0890081	0.530575	mir-1(gk276) / N2			Probable ATP-dependent RNA helicase DDX55 homolog	ZK512.2	WBGene00013983
	G5EEL9	7	G5EEL9	0.183999	-0.0340423	0.40204	29.9627	0.0891792	0.530575	mir-1(gk276) / N2	hmg-11	hmg-I-alpha	HMG	T05A7.4	WBGene00001976
	A0A0K3AT86;A0A0K3AWA2;D0VWL8;A0A0K3AVH8;A0A0K3AYH6;A0A0K3AT74;A0A0K3ASN9;A0A0K3AYI1;A0A0K3ASN4;D0VWL7;A0A0K3AT80;A0A0K3AW96;D0VWL6;A0A0K3AVI4;A0A0K3ASM8;A0A0K3AVH5	22;22;22;22;22;22;21;21;21;21;21;21;21;20;19;18	D0VWL8	0.238587	-0.0442592	0.521433	28.1325	0.0892933	0.530575	mir-1(gk276) / N2	fln-2		FiLamiN (Actin binding protein) homolog	C23F12.1	WBGene00016006
	Q9XVT0	11	Q9XVT0	0.168108	-0.0312875	0.367503	29.5244	0.0894348	0.530575	mir-1(gk276) / N2	rrbs-1		Ribosome biogenesis regulatory protein homolog	C15H11.9	WBGene00007617
	Q86B39;O16720;G5EGR6;G5EES3	5;5;5;5	O16720	-0.557399	-1.21907	0.104267	24.8741	0.089654	0.530575	mir-1(gk276) / N2	alg-2		Protein argonaute	T07D3.7	WBGene00000106
	Q22752	3	Q22752	-1.27868	-2.79686	0.239504	24.5946	0.089711	0.530575	mir-1(gk276) / N2	dyrb-1		Dynein light chain roadblock	T24H10.6	WBGene00012004
	Q8IG31;H2KZL7;A0A0K3AUJ9	16;15;15	Q8IG31	-0.257671	-0.563873	0.0485318	32.2942	0.0899531	0.530575	mir-1(gk276) / N2	prdx-2		PeRoxireDoXin	F09E5.15	WBGene00006434
	O02209	3	O02209	-1.44574	-3.1639	0.272413	24.67	0.0899707	0.530575	mir-1(gk276) / N2	tads-1		Temporal Asymmetry between Division of Sister cells	C01A2.5	WBGene00007217
	P16356	3	P16356	-0.611693	-1.33872	0.115339	24.5201	0.0900017	0.530575	mir-1(gk276) / N2	ama-1	rpb-1	DNA-directed RNA polymerase II subunit RPB1	F36A4.7	WBGene00000123
	Q11189	4	Q11189	-0.714801	-1.56469	0.135086	25.0528	0.090101	0.530575	mir-1(gk276) / N2	mrps-17		28S ribosomal protein S17, mitochondrial	C05D11.10	WBGene00015487
	O62220	5	O62220	0.31663	-0.060729	0.693988	27.469	0.0907558	0.530575	mir-1(gk276) / N2			Acidic leucine-rich nuclear phosphoprotein 32-related protein 1	F33H2.3	WBGene00009367
	Q10020	7	Q10020	0.251921	-0.0486983	0.55254	30.7692	0.0911077	0.530575	mir-1(gk276) / N2			Uncharacterized protein T28D9.1	T28D9.1	WBGene00020894
	Q21032;H9G2T4;H9G2T3	16;15;1	Q21032	-0.409107	-0.897502	0.0792873	29.0663	0.0912238	0.530575	mir-1(gk276) / N2	idh-1		Isocitrate dehydrogenase [NADP]	F59B8.2	WBGene00010317
	Q86NB3;Q23552;H2KZF5	3;3;3	Q23552	-0.293928	-0.645607	0.0577519	25.7409	0.0918491	0.530575	mir-1(gk276) / N2	pmt-1		Phosphoethanolamine MethylTransferase	ZK622.3	WBGene00022781
	Q9N489;H2L0S9	4;1	Q9N489	-0.911162	-2.00687	0.184541	25.297	0.0932662	0.530575	mir-1(gk276) / N2	ncap-1		NeCAP (NECAP) endocytosis associated protein homolog	Y110A2AR.3	WBGene00022453
	Q09289;A0A2K5ATW5	20;17	Q09289	0.188863	-0.0388598	0.416586	30.2735	0.0940234	0.530575	mir-1(gk276) / N2	rpn-13		Proteasomal ubiquitin receptor ADRM1 homolog	C56G2.7	WBGene00016981
	P34460	10	P34460	-0.176103	-0.388499	0.0362925	31.0241	0.0941011	0.530575	mir-1(gk276) / N2	eef-1B.1		Probable elongation factor 1-beta/1-delta 1	F54H12.6	WBGene00018846
	U4PE21;Q01630;U4PLJ8	3;3;1	Q01630	0.182297	-0.0377826	0.402376	25.7411	0.094377	0.530575	mir-1(gk276) / N2	unc-33		Protein unc-33	Y37E11C.1	WBGene00006769
	Q9N4E2	3	Q9N4E2	-0.7707	-1.70247	0.161065	24.3415	0.0947836	0.530575	mir-1(gk276) / N2			Uncharacterized protein	Y73C8B.3	WBGene00022260
	G5EEI8	9	G5EEI8	0.256106	-0.0536657	0.565877	28.759	0.0949157	0.530575	mir-1(gk276) / N2	chp-1	chp	CHORD Protein	Y110A7A.13	WBGene00000502
	Q18577	7	Q18577	0.254106	-0.0533233	0.561535	27.9318	0.0949868	0.530575	mir-1(gk276) / N2			Uncharacterized protein	C42D4.1	WBGene00016594
	A7DT45	9	A7DT45	0.195511	-0.0411371	0.432159	29.1851	0.0951194	0.530575	mir-1(gk276) / N2	oxy-5		Uncharacterized protein	F56H1.7	WBGene00045483
	Q9XVI9	6	Q9XVI9	0.184258	-0.0390386	0.407555	28.5551	0.095464	0.530575	mir-1(gk276) / N2	mlc-5		Myosin-2 essential light chain	T12D8.6	WBGene00011734
	Q21351	28	Q21351	0.149692	-0.0317319	0.331116	31.2369	0.0954906	0.530575	mir-1(gk276) / N2	gtbp-1		Ras-Gtpase-activating protein SH3 (Three) domain-Binding Protein	K08F4.2	WBGene00010677
	P53588	20	P53588	-0.322681	-0.713903	0.0685405	29.2662	0.0955917	0.530575	mir-1(gk276) / N2	suca-1		Succinate--CoA ligase [ADP-forming] subunit beta, mitochondrial	F47B10.1	WBGene00009812
	P34434	7	P34434	-0.43505	-0.963549	0.0934495	25.7862	0.0961574	0.530575	mir-1(gk276) / N2			Uncharacterized protein F44E2.4	F44E2.4	WBGene00018418
	A0A0K3AWR8;O16657	7;7	O16657	0.394155	-0.0847365	0.873046	26.4474	0.0962002	0.530575	mir-1(gk276) / N2			Uncharacterized protein	C03H5.3	WBGene00015405
	Q95XJ0;Q95XI9	13;10	Q95XJ0	-0.420718	-0.932662	0.0912263	28.5551	0.0966387	0.530575	mir-1(gk276) / N2			Uncharacterized protein	Y69A2AR.18	WBGene00022089
	A0A2C9C3L5;P98080;A0A2C9C366;A0A2C9C3F6	16;16;12;12	P98080	-0.306772	-0.680245	0.0667013	29.3684	0.0967796	0.530575	mir-1(gk276) / N2	ucr-1		Cytochrome b-c1 complex subunit 1, mitochondrial	F56D2.1	WBGene00018963
	D5MCQ2;D5MCQ6;D5MCQ9;D5MCQ3;Q21900;D5MCQ5	12;12;10;10;10;10	D5MCQ2	0.256012	-0.0558163	0.567841	29.1786	0.09692	0.530575	mir-1(gk276) / N2	sup-26		SUPpressor	R10E4.2	WBGene00006331
	G5EET8	5	G5EET8	-0.938242	-2.08111	0.204629	25.5343	0.0969381	0.530575	mir-1(gk276) / N2	pud-1.2	pud-1.1	Protein Up-regulated in Daf-2(Gf)	F15E11.13_Y19D10B.7	WBGene00017499_WBGene00021236
	U4PLP4;O44466;H2KZF8	4;4;3	O44466	0.270023	-0.0590116	0.599058	27.9281	0.0970435	0.530575	mir-1(gk276) / N2	test-1		Vertebrate proteoglycan TESTican homolog	C54E4.2	WBGene00016918
	H2KMK6;E8MDV8;Q9NAI9	3;2;1	H2KMK6	1.04503	-0.229692	2.31975	24.6758	0.0973406	0.530575	mir-1(gk276) / N2			Uncharacterized protein	Y38E10A.22	WBGene00012600
	Q95Y89	3	Q95Y89	-0.346611	-0.769505	0.0762831	25.4525	0.0974089	0.530575	mir-1(gk276) / N2	lpd-7		Pescadillo homolog	R13A5.12	WBGene00003063
	O44727	9	O44727	0.183587	-0.0406082	0.407782	28.8262	0.0976727	0.530575	mir-1(gk276) / N2	cpn-4		CalPoNin	F49D11.8	WBGene00000780
	Q09457	18	Q09457	0.172607	-0.0381833	0.383397	29.6402	0.0976779	0.530575	mir-1(gk276) / N2	bli-1		Cuticle collagen bli-1	C09G5.6	WBGene00000251
	O18054	3	O18054	0.219772	-0.0488768	0.488422	27.1025	0.0979588	0.530575	mir-1(gk276) / N2	pfd-3	vbp-1	Probable prefoldin subunit 3	T06G6.9	WBGene00006889
	P91917;E2JL06	15;6	P91917	-0.266357	-0.593323	0.0606085	29.6329	0.0991847	0.530575	mir-1(gk276) / N2	ola-1	tag-210	Obg-like ATPase 1	W08E3.3	WBGene00012344
	Q9UAN9;H2KYE0;Q9N5D3	26;25;1	Q9UAN9	-0.196545	-0.43879	0.0457002	29.0924	0.100372	0.530575	mir-1(gk276) / N2	nra-4		Nicotinic Receptor Associated	C02E11.1	WBGene00015344
	Q21481	20	Q21481	-0.207064	-0.462346	0.048217	29.6209	0.100454	0.530575	mir-1(gk276) / N2	dhs-28		DeHydrogenases, Short chain	M03A8.1	WBGene00000991
	Q23621	45	Q23621	-0.245743	-0.548721	0.0572348	32.1326	0.100465	0.530575	mir-1(gk276) / N2	gdh-1		Glutamate dehydrogenase	ZK829.4	WBGene00014095
	Q9TYP9	5	Q9TYP9	-0.377831	-0.844033	0.0883713	24.7616	0.100701	0.530575	mir-1(gk276) / N2	mca-2		Calcium-transporting ATPase	R05C11.3	WBGene00019875
	Q09365	1	Q09365	0.765778	-0.180595	1.71215	26.5056	0.101165	0.530575	mir-1(gk276) / N2			Uncharacterized protein ZK1320.3	ZK1320.3	WBGene00014253
	Q19058	13	Q19058	-0.251579	-0.562929	0.0597719	27.9228	0.101586	0.530575	mir-1(gk276) / N2	maoc-1		MAO-C-like dehydratase domain	E04F6.3	WBGene00017123
	Q18541;D3YT45;B3GWC9;Q7JLS6;D3YT46;D3YT48	7;6;6;6;5;1	Q18541	0.35082	-0.0837422	0.785382	29.0683	0.101854	0.530575	mir-1(gk276) / N2			Uncharacterized protein	C39E9.8	WBGene00008032
	O01802	36	O01802	-0.198795	-0.445905	0.0483159	33.8184	0.102897	0.530575	mir-1(gk276) / N2	rpl-7		60S ribosomal protein L7	F53G12.10	WBGene00004418
	O16424	6	O16424	-0.198295	-0.444966	0.0483752	29.1029	0.103116	0.530575	mir-1(gk276) / N2	phat-4		PHAryngeal gland Toxin-related	T05B4.3	WBGene00020237
	O16266	10	O16266	0.158855	-0.0387896	0.356499	28.7281	0.103171	0.530575	mir-1(gk276) / N2			Uncharacterized protein	F40A3.6	WBGene00018221
	P90849	11	P90849	0.192159	-0.0474146	0.431732	31.6686	0.103789	0.530575	mir-1(gk276) / N2	cox-5b	cox-5B	Cytochrome OXidase assembly protein	F26E4.9	WBGene00000371
	P49405	32	P49405	-0.232681	-0.522803	0.0574418	32.6352	0.103819	0.530575	mir-1(gk276) / N2	rpl-5		60S ribosomal protein L5	F54C9.5	WBGene00004416
	Q21774	4	Q21774	-0.442756	-0.995067	0.109555	25.7959	0.103956	0.530575	mir-1(gk276) / N2	adsl-1		Adenylosuccinate lyase	R06C7.5	WBGene00011064
	Q9BPN6	5	Q9BPN6	-0.222208	-0.499472	0.0550573	26.3968	0.104037	0.530575	mir-1(gk276) / N2	mrpl-15		Mitochondrial Ribosomal Protein, Large	Y92H12BR.8	WBGene00022373
	H2FLH3;Q23551;H2FLH2;A0A061ACT3;A0A061AE24	109;109;107;107;107	Q23551	-0.139486	-0.313559	0.034587	31.4395	0.104082	0.530575	mir-1(gk276) / N2	unc-22		Twitchin	ZK617.1	WBGene00006759
	O44480	17	O44480	-0.16379	-0.368231	0.0406521	31.582	0.104139	0.530575	mir-1(gk276) / N2	rpl-20		60S ribosomal protein L18a	E04A4.8	WBGene00004432
	G5EBH3;G5EG97;G5EC35;G5EFW3	10;10;10;10	G5EBH3	-0.527031	-1.18626	0.132203	25.4156	0.104778	0.530575	mir-1(gk276) / N2	sma-1		SMAll	R31.1	WBGene00004855
	O45502	16	O45502	0.204232	-0.051447	0.45991	29.4798	0.105034	0.530575	mir-1(gk276) / N2	dnj-12		DNaJ domain (Prokaryotic heat shock protein)	F39B2.10	WBGene00001030
	O61856	7	O61856	-0.802087	-1.8066	0.202427	25.7966	0.105148	0.530575	mir-1(gk276) / N2			Acetolactate synthase-like protein	T26C12.1	WBGene00020831
	G5EGT7	23	G5EGT7	0.219701	-0.0555511	0.494954	29.4521	0.105262	0.530575	mir-1(gk276) / N2	iffb-1		Eukaryotic translation initiation factor eIF5B	Y54F10BM.2	WBGene00021857
	Q19126	9	Q19126	-0.273427	-0.616227	0.0693734	31.2976	0.105473	0.530575	mir-1(gk276) / N2	asb-2		ATP Synthase B homolog	F02E8.1	WBGene00000207
	P46502	9	P46502	-0.18948	-0.427276	0.0483153	28.0867	0.10578	0.530575	mir-1(gk276) / N2	rpt-3		Probable 26S proteasome regulatory subunit 6B	F23F12.6	WBGene00004503
	O01530	6	O01530	-0.232355	-0.524019	0.0593082	28.7195	0.105843	0.530575	mir-1(gk276) / N2	asp-6		Aspartic protease 6	F21F8.7	WBGene00000219
	O45552	37	O45552	-0.164053	-0.37014	0.042033	31.1072	0.106077	0.530575	mir-1(gk276) / N2	acaa-2		ACetyl-CoA Acyltransferase 2 homolog	F53A2.7	WBGene00009952
	P46562	16	P46562	-0.30294	-0.683844	0.0779643	27.882	0.106354	0.530575	mir-1(gk276) / N2	alh-9		Putative aldehyde dehydrogenase family 7 member A1 homolog	F01F1.6	WBGene00000115
	G4SL51	5	G4SL51	0.680701	-0.175657	1.53706	25.8456	0.106523	0.530575	mir-1(gk276) / N2	pqn-52		Prion-like-(Q/N-rich)-domain-bearing protein	M01E11.4	WBGene00019713
	Q2XN04;Q23150;V6CM19;O01799	3;3;1;1	Q23150	-0.811636	-1.83289	0.20962	26.2727	0.106575	0.530575	mir-1(gk276) / N2	col-181		COLlagen	W03G11.1	WBGene00000754
	P51403	35	P51403	-0.203965	-0.460645	0.0527141	34.1381	0.106618	0.530575	mir-1(gk276) / N2	rps-2		40S ribosomal protein S2	C49H3.11	WBGene00004471
	G5ECM6	27	G5ECM6	-0.108458	-0.245009	0.0280937	31.2	0.106759	0.530575	mir-1(gk276) / N2	tufm-1		Elongation factor Tu homologue	Y71H2AM.23	WBGene00007000
	Q95XJ1	4	Q95XJ1	0.913171	-0.237813	2.06415	25.1356	0.107098	0.530575	mir-1(gk276) / N2			Uncharacterized protein	Y69A2AR.21	WBGene00022092
	Q9U3D6	4	Q9U3D6	0.205363	-0.0535974	0.464323	26.5865	0.107235	0.530575	mir-1(gk276) / N2	adr-1		A-to-I RNA editing regulator adr-1	H15N14.1	WBGene00000079
	Q93934	18	Q93934	-0.275359	-0.623303	0.0725855	30.5808	0.10787	0.530575	mir-1(gk276) / N2			Uncharacterized protein	R07H5.8	WBGene00011128
	Q9N537	7	Q9N537	-0.247963	-0.561353	0.0654271	26.7947	0.107932	0.530575	mir-1(gk276) / N2	szy-2		Suppressor of ZYg-1	Y32H12A.4	WBGene00021312
	Q20121	7	Q20121	-0.155911	-0.353012	0.0411908	27.3035	0.108014	0.530575	mir-1(gk276) / N2	acs-4		Fatty Acid CoA Synthetase family	F37C12.7	WBGene00018152
	Q21884	4	Q21884	-0.161476	-0.36569	0.0427377	26.034	0.10813	0.530575	mir-1(gk276) / N2			Uncharacterized protein	R09H10.5	WBGene00011182
	I7J4C6	4	I7J4C6	0.187944	-0.0499908	0.425878	27.4894	0.108451	0.530575	mir-1(gk276) / N2			Uncharacterized protein	K07F5.15	WBGene00010639
	Q27249	39	Q27249	-0.226514	-0.51334	0.0603124	27.3385	0.108518	0.530575	mir-1(gk276) / N2	lev-11	tmy-1	Tropomyosin isoforms c/e	Y105E8B.1	WBGene00002978
	O44451	4	O44451	-0.191865	-0.435033	0.0513025	25.5947	0.108792	0.530575	mir-1(gk276) / N2	pdhb-1		Pyruvate dehydrogenase E1 component subunit beta, mitochondrial	C04C3.3	WBGene00015413
	G5EDS2;K8FE00;K8F7Z0;K8ESK9	6;6;6;6	G5EDS2	0.154832	-0.0414633	0.351127	26.5102	0.108891	0.530575	mir-1(gk276) / N2	pod-1		POD-1	Y76A2B.1	WBGene00004075
	Q09444	7	Q09444	0.283587	-0.0760717	0.643246	26.0472	0.109001	0.530575	mir-1(gk276) / N2	ubh-4		Ubiquitin carboxyl-terminal hydrolase ubh-4	C08B11.7	WBGene00006724
	G5EDA8;G5EGA2;G5EF70	11;10;4	G5EDA8	0.162248	-0.0436551	0.368151	27.739	0.1092	0.530575	mir-1(gk276) / N2			Uncharacterized protein	Y45F10B.13	WBGene00012875
	P54412	16	P54412	-0.196817	-0.446709	0.0530756	31.4776	0.109348	0.530575	mir-1(gk276) / N2	eef-1G		Probable elongation factor 1-gamma	F17C11.9	WBGene00008920
	G5EDZ5;O62305;F5GUA8;F5GUA9	6;6;3;3	O62305	-0.777652	-1.76626	0.210959	25.0793	0.10974	0.530575	mir-1(gk276) / N2	unc-43		Calcium/calmodulin-dependent protein kinase type II	K11E8.1	WBGene00006779
	P34575	20	P34575	-0.249089	-0.565766	0.0675869	29.9218	0.109754	0.530575	mir-1(gk276) / N2	cts-1		Probable citrate synthase, mitochondrial	T20G5.2	WBGene00000833
	O62197;Q3S1M6	5;2	O62197	-0.670658	-1.52338	0.182069	25.3596	0.109789	0.530575	mir-1(gk276) / N2			Uncharacterized protein	F32A11.3	WBGene00009308
	P91374	18	P91374	-0.545313	-1.23877	0.148143	30.6986	0.109835	0.530575	mir-1(gk276) / N2	rpl-15		60S ribosomal protein L15	K11H12.2	WBGene00004427
	A7LPE6;Q7JMU1;P34517;A7LPE5	7;7;7;5	P34517	-0.380038	-0.865057	0.10498	27.3935	0.110951	0.530575	mir-1(gk276) / N2	gpdh-2		Probable glycerol-3-phosphate dehydrogenase 2	K11H3.1	WBGene00010778
	G4SI07	15	G4SI07	0.184749	-0.0511836	0.420682	29.0215	0.111149	0.530575	mir-1(gk276) / N2	gei-15		GEX Interacting protein	M03A8.4	WBGene00001572
	P48154	37	P48154	-0.221752	-0.504985	0.0614816	32.8076	0.1112	0.530575	mir-1(gk276) / N2	rps-1		40S ribosomal protein S3a	F56F3.5	WBGene00004470
	Q7JMS5;G5EBG3	7;1	Q7JMS5	0.423734	-0.117982	0.96545	27.5173	0.111489	0.530575	mir-1(gk276) / N2			Uncharacterized protein	F40F12.7	WBGene00009595
	P90735;G5EFV6	29;1	P90735	-0.270241	-0.616019	0.0755364	30.1987	0.111754	0.530575	mir-1(gk276) / N2	eat-6		Sodium/potassium-transporting ATPase subunit alpha	B0365.3	WBGene00001137
	Q20870	4	Q20870	0.320437	-0.0901492	0.731023	26.1645	0.112199	0.530575	mir-1(gk276) / N2	daz-1		DAZ protein 1	F56D1.7	WBGene00000935
	Q9N4G9	8	Q9N4G9	0.270976	-0.076452	0.618404	29.6885	0.112396	0.530575	mir-1(gk276) / N2	snr-7		Probable small nuclear ribonucleoprotein G	Y71F9B.4	WBGene00004920
	Q20277	11	Q20277	0.153745	-0.0436802	0.351169	32.2602	0.112881	0.530575	mir-1(gk276) / N2	fipr-21		FIP (Fungus-Induced Protein) Related	F41E7.5	WBGene00009621
	Q21966	5	Q21966	-1.08335	-2.47638	0.30968	24.9872	0.113309	0.530575	mir-1(gk276) / N2	asp-4		ASpartyl Protease	R12H7.2	WBGene00000217
	G5ECS4	8	G5ECS4	-0.719939	-1.6459	0.206028	26.2488	0.113388	0.530575	mir-1(gk276) / N2	glf-1	glf	GaLactoFuranose synthesis (UGM, UDP-galactopyranose mutase)	H04M03.4	WBGene00019154
	Q95ZS5;O45574	9;3	Q95ZS5	-0.350533	-0.801518	0.100451	27.4206	0.113484	0.530575	mir-1(gk276) / N2			Uncharacterized protein	F56A8.3	WBGene00010139
	Q9UAY9	14	Q9UAY9	-0.141978	-0.324654	0.0406974	27.898	0.113503	0.530575	mir-1(gk276) / N2	rpac-40		RNA Polymerase I/III (A/C) shared subunit	H43I07.2	WBGene00019275
	Q11190	4	Q11190	-0.155876	-0.356592	0.0448407	27.4051	0.113755	0.530575	mir-1(gk276) / N2	let-721		Electron transfer flavoprotein-ubiquinone oxidoreductase, mitochondrial	C05D11.12	WBGene00002855
	Q21541	11	Q21541	0.255917	-0.0738307	0.585665	28.3952	0.113958	0.530575	mir-1(gk276) / N2			Uncharacterized protein	M142.5	WBGene00010922
	Q8MXR6;Q4W5P0	20;18	Q8MXR6	0.183762	-0.0532132	0.420737	31.7606	0.114224	0.530575	mir-1(gk276) / N2	sqd-1		Homologous to Drosophila SQD (Squid) protein	Y73B6BL.6	WBGene00022235
	G5EFZ5;G5EG22	1;1	G5EFZ5	1.23128	-0.35669	2.81925	25.1152	0.114252	0.530575	mir-1(gk276) / N2	icln-1		ICLN (ICLn) ion channel homolog	C01F6.8	WBGene00002046
	Q22037	21	Q22037	0.130309	-0.0378697	0.298488	30.6409	0.114479	0.530575	mir-1(gk276) / N2	hrp-1	rbp-1	Heterogeneous nuclear ribonucleoprotein A1	F42A6.7	WBGene00001999
	Q9XVR8	10	Q9XVR8	0.233117	-0.0681642	0.534399	31.0626	0.11492	0.530575	mir-1(gk276) / N2	nola-3		Putative H/ACA ribonucleoprotein complex subunit 3	C25A1.6	WBGene00007708
	P46561	23	P46561	-0.254724	-0.584507	0.0750584	33.0646	0.115477	0.530575	mir-1(gk276) / N2	atp-2		ATP synthase subunit beta, mitochondrial	C34E10.6	WBGene00000229
	H2L0K4;Q8WTM0	6;6	Q8WTM0	0.247312	-0.0729938	0.567617	26.5499	0.115597	0.530575	mir-1(gk276) / N2			Uncharacterized protein	Y45G5AL.1	WBGene00021554
	P25807	3	P25807	-1.08151	-2.48279	0.319762	25.5797	0.115723	0.530575	mir-1(gk276) / N2	cpr-1	gcp-1	Gut-specific cysteine proteinase	C52E4.1	WBGene00000781
	G5ED27;G5EG33;G5EDG4	24;24;24	G5ED27	-0.16549	-0.380042	0.0490631	27.6663	0.115923	0.530575	mir-1(gk276) / N2	him-4		High Incidence of Males (Increased X chromosome loss)	F15G9.4	WBGene00001863
	O44444	12	O44444	0.35656	-0.106078	0.819199	29.1075	0.116178	0.530575	mir-1(gk276) / N2			Uncharacterized protein	C02B10.4	WBGene00015329
	Q18782	11	Q18782	0.233308	-0.0696546	0.53627	26.9973	0.116436	0.530575	mir-1(gk276) / N2			Uncharacterized protein	C52E12.1	WBGene00016888
	Q21811	6	Q21811	0.342328	-0.102258	0.786913	28.2472	0.116476	0.530575	mir-1(gk276) / N2			Uncharacterized protein	R07E3.6	WBGene00011107
	Q86NC1;Q9N5U1;A0A131MDC6;A0A131MCL1	5;3;1;1	Q86NC1	-0.701126	-1.61276	0.210509	25.6	0.116854	0.530575	mir-1(gk276) / N2	pygl-1		Alpha-1,4 glucan phosphorylase	T22F3.3	WBGene00020696
	Q20970;D3YT56;D3YT55	24;21;3	Q20970	0.181972	-0.054653	0.418596	30.2316	0.116878	0.530575	mir-1(gk276) / N2	mars-1	mrs-1	Methionine--tRNA ligase, cytoplasmic	F58B3.5	WBGene00003415
	Q20230;A0A0K3ARK6	5;4	Q20230	-0.221579	-0.50979	0.0666326	25.3955	0.116971	0.530575	mir-1(gk276) / N2			UMP-CMP kinase 2	F40F8.1	WBGene00009575
	O44133	7	O44133	-0.655886	-1.50912	0.197348	25.5384	0.117013	0.530575	mir-1(gk276) / N2			Uncharacterized protein	C24D10.6	WBGene00016057
	Q19713	8	Q19713	-1.24014	-2.85409	0.373799	26.0854	0.117144	0.530575	mir-1(gk276) / N2	fars-3	frs-2	Phenylalanine--tRNA ligase beta subunit	F22B5.9	WBGene00001498
	G5EBY3	27	G5EBY3	0.177033	-0.0538871	0.407952	28.3707	0.11788	0.531434	mir-1(gk276) / N2	nmy-2		Non-muscle MYosin	F20G4.3	WBGene00003777
	O17347	6	O17347	0.188649	-0.0574824	0.434779	28.6708	0.117958	0.531434	mir-1(gk276) / N2			Uncharacterized protein	H42K12.3	WBGene00019272
	Q20716	8	Q20716	0.873721	-0.271483	2.01893	26.3364	0.119448	0.536728	mir-1(gk276) / N2	isy-1		ISY splicing factor homolog	F53B7.3	WBGene00009966
	P46975	2	P46975	-1.21797	-2.81707	0.381135	25.239	0.119995	0.536787	mir-1(gk276) / N2	stt-3		Dolichyl-diphosphooligosaccharide--protein glycosyltransferase subunit stt-3	T12A2.2	WBGene00020437
	Q09958	10	Q09958	0.170614	-0.0534558	0.394684	28.3471	0.120092	0.536787	mir-1(gk276) / N2			Probable rRNA-processing protein EBP2 homolog	C18A3.3	WBGene00015941
	C0VXV6	6	C0VXV6	0.260095	-0.0821441	0.602334	27.7852	0.120715	0.538161	mir-1(gk276) / N2	mrpl-46		Mitochondrial Ribosomal Protein, Large	Y55F3BL.1	WBGene00021935
	Q22822	14	Q22822	0.171638	-0.0544796	0.397755	28.5375	0.121109	0.53851	mir-1(gk276) / N2			Uncharacterized protein	T27A10.6	WBGene00020846
	Q93573	24	Q93573	-0.216201	-0.501718	0.0693167	32.5838	0.121906	0.54064	mir-1(gk276) / N2	tct-1		Translationally-controlled tumor protein homolog	F25H2.11	WBGene00009122
	Q23402	2	Q23402	-0.329987	-0.766826	0.106852	24.9488	0.122701	0.54092	mir-1(gk276) / N2			Protein BCCIP homolog	ZK1127.4	WBGene00022851
	O01263;G5EE65	4;2	O01263	0.141599	-0.0458516	0.329049	26.5197	0.122703	0.54092	mir-1(gk276) / N2	hsp-12.1		Heat Shock Protein	T22A3.2	WBGene00011906
	O18089	5	O18089	-0.184368	-0.428737	0.060001	28.0664	0.123109	0.54092	mir-1(gk276) / N2			Uncharacterized protein	T13F3.6	WBGene00011753
	Q17684	4	Q17684	0.263176	-0.0858096	0.612161	27.1906	0.123262	0.54092	mir-1(gk276) / N2	rpb-6		Probable DNA-directed RNA polymerases I, II, and III subunit RPABC2	C06A1.5	WBGene00007355
	P90961	16	P90961	0.156469	-0.0512028	0.364141	29.5419	0.123557	0.54092	mir-1(gk276) / N2	clic-1		Clathrin light chain	T05B11.3	WBGene00020246
	Q95X44	34	Q95X44	0.124167	-0.0408246	0.289159	32.8761	0.123943	0.54121	mir-1(gk276) / N2	vha-8		Vacuolar H ATPase	C17H12.14	WBGene00006917
	P49197	23	P49197	0.208995	-0.0691587	0.487149	34.0703	0.124473	0.54121	mir-1(gk276) / N2	rps-21		40S ribosomal protein S21	F37C12.11	WBGene00004490
	Q9BKP8	2	Q9BKP8	-1.58692	-3.70334	0.529508	25.21	0.125163	0.54121	mir-1(gk276) / N2			Uncharacterized protein	C17F4.7	WBGene00015913
	Q95YC7	7	Q95YC7	0.26736	-0.0892325	0.623952	30.2669	0.125184	0.54121	mir-1(gk276) / N2			Uncharacterized protein	C45B2.2	WBGene00016659
	P41988	11	P41988	-0.217997	-0.508937	0.072942	29.2296	0.125396	0.54121	mir-1(gk276) / N2	cct-1	tcp-1	T-complex protein 1 subunit alpha	T05C12.7	WBGene00000377
	H2KYS8	10	H2KYS8	-0.143826	-0.335891	0.0482394	27.4858	0.125596	0.54121	mir-1(gk276) / N2	cpna-1		Copine family protein 1	F31D5.3	WBGene00006495
	B7WN95	12	B7WN95	-1.18481	-2.76821	0.398583	26.1962	0.125848	0.54121	mir-1(gk276) / N2	rpl-32		Ribosomal Protein, Large subunit	T24B8.1	WBGene00004446
	P29691	56	P29691	-0.143191	-0.334962	0.0485809	33.8883	0.126565	0.541339	mir-1(gk276) / N2	eef-2		Elongation factor 2	F25H5.4	WBGene00001167
	G5EE04	23	G5EE04	0.147198	-0.0499974	0.344394	30.8839	0.126662	0.541339	mir-1(gk276) / N2	hip-1		Hsp-70 Interacting Protein homolog	T12D8.8	WBGene00011735
	Q9N4G8	3	Q9N4G8	-0.210587	-0.492846	0.0716712	27.3365	0.126832	0.541339	mir-1(gk276) / N2	yop-1		Receptor expression-enhancing protein	Y71F9B.3	WBGene00022127
	Q9XUW5	17	Q9XUW5	-0.219106	-0.513323	0.0751111	29.5067	0.12745	0.542534	mir-1(gk276) / N2	ddx-17		DEAD boX helicase homolog	F58E10.3	WBGene00010260
	V6CLE5;P34652	1;1	P34652	0.545541	-0.187666	1.27875	24.6425	0.127749	0.542534	mir-1(gk276) / N2	cnx-1		Calnexin	ZK632.6	WBGene00000567
	Q5WRT8;Q5WRT9	40;40	Q5WRT8	0.159267	-0.0553527	0.373887	29.0889	0.128638	0.542786	mir-1(gk276) / N2	npp-21		Nuclear Pore complex Protein	R07G3.3	WBGene00019940
	Q09390	4	Q09390	1.00239	-0.355023	2.35981	26.0767	0.130304	0.542786	mir-1(gk276) / N2	hmg-1.2		High mobility group protein 1.2	F47D12.4	WBGene00001972
	O01592;O16284;O16282	7;2;1	O01592	-0.414669	-0.977092	0.147754	25.1672	0.130842	0.542786	mir-1(gk276) / N2	cysl-3		Cysteine synthase 3	R08E5.2	WBGene00019962
	Q27389	35	Q27389	-0.375665	-0.885364	0.134034	32.4146	0.130961	0.542786	mir-1(gk276) / N2	rpl-16		60S ribosomal protein L13a	M01F1.2	WBGene00004428
	Q10121	17	Q10121	0.2123	-0.0757732	0.500373	31.3395	0.130993	0.542786	mir-1(gk276) / N2			RutC family protein C23G10.2	C23G10.2	WBGene00016011
	Q9GRZ2	5	Q9GRZ2	-1.49936	-3.5357	0.536992	25.079	0.131303	0.542786	mir-1(gk276) / N2	prp-6		Yeast PRP (Splicing factor) related	Y59A8B.6	WBGene00013343
	Q95XR0	9	Q95XR0	-0.13509	-0.318647	0.0484678	28.2072	0.131462	0.542786	mir-1(gk276) / N2	eif-2gamma		Eukaryotic Initiation Factor	Y39G10AR.8	WBGene00021466
	P91375	10	P91375	0.198325	-0.071414	0.468065	28.0812	0.13179	0.542786	mir-1(gk276) / N2			Putative bolA-like protein K11H12.1	K11H12.1	WBGene00019658
	G5EDE2	4	G5EDE2	0.421722	-0.152021	0.995465	26.4947	0.131889	0.542786	mir-1(gk276) / N2	hpl-2	K01G5.2a	Chromo-domain protein	K01G5.2	WBGene00001996
	P54811	45	P54811	-0.17899	-0.42256	0.0645797	30.6769	0.13197	0.542786	mir-1(gk276) / N2	cdc-48.1		Transitional endoplasmic reticulum ATPase homolog 1	C06A1.1	WBGene00007352
	P52275;CON__ENSEMBL:ENSBTAP00000025008	21;4	P52275	-0.342683	-0.809141	0.123774	30.3401	0.132069	0.542786	mir-1(gk276) / N2	tbb-2		Tubulin beta-2 chain	C36E8.5	WBGene00006537
	Q20173	4	Q20173	-0.423014	-0.999056	0.153027	26.1298	0.132211	0.542786	mir-1(gk276) / N2	twf-2		TWinFilin actin binding protein homolog	F38E9.5	WBGene00018187
	P34690;P91910;Q9XXH2;Q20221;Q19490;P52274	17;4;2;2;1;1	P34690	-0.592893	-1.40065	0.21486	27.9154	0.132371	0.542786	mir-1(gk276) / N2	tba-2		Tubulin alpha-2 chain	C47B2.3	WBGene00006529
	Q9GUF2	6	Q9GUF2	-0.221645	-0.523703	0.080412	26.9569	0.132473	0.542786	mir-1(gk276) / N2	acp-6		ACid Phosphatase family	Y73B6BL.24	WBGene00022245
	O45226;D3YT71	8;3	O45226	0.470429	-0.171261	1.11212	32.0312	0.13279	0.542786	mir-1(gk276) / N2	rpl-29		60S ribosomal protein L29	B0513.3	WBGene00004443
	Q9XW41	11	Q9XW41	0.310206	-0.113345	0.733758	28.8779	0.133126	0.542786	mir-1(gk276) / N2	snx-3		Sorting NeXin	W06D4.5	WBGene00006503
	O18015;Q52GX6	7;6	O18015	0.175601	-0.0642323	0.415435	28.0441	0.133226	0.542786	mir-1(gk276) / N2	grl-7		GRound-Like (Grd related)	T02E9.2	WBGene00001716
	Q10661	4	Q10661	0.243713	-0.0898807	0.577307	28.3436	0.133986	0.543607	mir-1(gk276) / N2	dpy-30		Dosage compensation protein dpy-30	ZK863.6	WBGene00001088
	A0A2C9C332;A0A2C9C2V5;A0A2C9C2S8;O01761;A0A2C9C2V3;A0A2C9C2W9;A0A2C9C330;A0A2C9C2G8;A0A2C9C3B7;A0A2C9C365	49;49;49;49;45;45;44;44;44;39	O01761	0.110838	-0.0410373	0.262714	29.4455	0.134352	0.543607	mir-1(gk276) / N2	unc-89		Muscle M-line assembly protein unc-89	C09D1.1	WBGene00006820
	Q93618	15	Q93618	-0.393725	-0.933277	0.145827	27.3974	0.134385	0.543607	mir-1(gk276) / N2			Zinc finger CCCH domain-containing protein 15 homolog	F27D4.4	WBGene00009189
	P41847	18	P41847	0.199552	-0.0744474	0.473552	29.4935	0.135065	0.545055	mir-1(gk276) / N2			Anamorsin homolog	T20B12.7	WBGene00020604
	Q04833	17	Q04833	-0.151809	-0.360625	0.0570079	27.7789	0.135685	0.545055	mir-1(gk276) / N2	lrp-1		Low-density lipoprotein receptor-related protein	F29D11.1	WBGene00003071
	O45246;G5ECU5	3;3	O45246	-0.71691	-1.70459	0.270772	25.1353	0.136233	0.545055	mir-1(gk276) / N2	hsp-70		Heat Shock Protein	C12C8.1	WBGene00002026
	P91918	6	P91918	-0.222242	-0.528449	0.0839637	27.9974	0.136261	0.545055	mir-1(gk276) / N2	snr-2		Probable small nuclear ribonucleoprotein-associated protein B	W08E3.1	WBGene00004915
	Q20034	4	Q20034	0.211426	-0.0803637	0.503216	27.5793	0.136842	0.545055	mir-1(gk276) / N2			Uncharacterized protein	F35D11.4	WBGene00018045
	P52014	18	P52014	0.2093	-0.0798427	0.498442	29.9984	0.137189	0.545055	mir-1(gk276) / N2	cyn-6	cyp-6	Peptidyl-prolyl cis-trans isomerase 6	F42G9.2	WBGene00000882
	O44995;W6RXW2	5;1	O44995	-0.371678	-0.885268	0.141912	26.4454	0.137275	0.545055	mir-1(gk276) / N2			Uncharacterized protein	K12C11.1	WBGene00019673
	P28548	5	P28548	-0.190285	-0.453246	0.0726752	27.7912	0.137304	0.545055	mir-1(gk276) / N2	kin-10	kin-5	Casein kinase II subunit beta	T01G9.6	WBGene00002196
	Q95QZ7;H2KYU6;O01894;Q95QZ9	4;4;3;3	Q95QZ7	-0.151789	-0.362261	0.0586835	26.659	0.13849	0.548484	mir-1(gk276) / N2	npl-4.1		NPL (Yeast Nuclear Protein Localization) homolog	F59E12.4	WBGene00019120
	O18181	2	O18181	0.17083	-0.0667064	0.408367	26.613	0.139471	0.550462	mir-1(gk276) / N2			Uncharacterized protein	W09D10.1	WBGene00012359
	Q9BIC3;Q9GYT0;Q8T8N8;O17612	28;28;23;1	Q9GYT0	-0.299663	-0.716535	0.117209	28.6677	0.139636	0.550462	mir-1(gk276) / N2	ech-1.2		Enoyl-CoA Hydratase	T08B2.7	WBGene00020347
	Q20202	7	Q20202	0.211496	-0.0837347	0.506726	27.4723	0.140848	0.553628	mir-1(gk276) / N2			Uncharacterized protein	F40E10.5	WBGene00009573
	O16294;A0A168H4W1	9;2	O16294	-0.208136	-0.498875	0.0826022	28.7696	0.141089	0.553628	mir-1(gk276) / N2			GMP reductase	F32D1.5	WBGene00017984
	G5EDV6;G5ECX8;A5Z2T4	6;6;2	G5ECX8	0.140157	-0.0563001	0.336613	26.9683	0.142315	0.556421	mir-1(gk276) / N2	istr-1		Increased Sodium Tolerance Related	K10C8.3	WBGene00010736
	Q7Z1P7;Q21850	2;2	Q21850	0.326319	-0.132725	0.785363	24.6141	0.143594	0.556421	mir-1(gk276) / N2			Uncharacterized protein	R08E3.1	WBGene00019957
	Q9NAI5;Q9U2J6	7;6	Q9NAI5	-0.286792	-0.6903	0.116717	26.843	0.143656	0.556421	mir-1(gk276) / N2			Uncharacterized protein	Y39G8B.1	WBGene00012722
	Q2EEM8	6	Q2EEM8	1.68581	-0.68786	4.05949	26.7358	0.143924	0.556421	mir-1(gk276) / N2	ttr-45		TransThyretin-Related family domain	JC8.14	WBGene00044737
	A0A078BPG0;H2KZI2	3;1	A0A078BPG0	-0.355856	-0.857241	0.145529	23.685	0.144159	0.556421	mir-1(gk276) / N2			Uncharacterized protein	F09E10.7	WBGene00017297
	Q93379	3	Q93379	-1.08059	-2.60355	0.442374	24.8443	0.144268	0.556421	mir-1(gk276) / N2	gsr-1		Glutathione reductase, mitochondrial	C46F11.2	WBGene00008117
	O45149	3	O45149	0.63785	-0.26183	1.53753	25.7747	0.144549	0.556421	mir-1(gk276) / N2	sna-1		Small Nuclear RNA (snRNA) Associated protein	W02F12.6	WBGene00020951
	O17919	15	O17919	-0.238374	-0.574639	0.0978904	29.5592	0.144592	0.556421	mir-1(gk276) / N2			Putative H/ACA ribonucleoprotein complex subunit 4	K01G5.5	WBGene00010478
	Q19102;A0A061AD09	10;1	Q19102	-0.397796	-0.959406	0.163815	28.4854	0.144884	0.556421	mir-1(gk276) / N2	ard-1		Alcohol/Ribitol Dehydrogenase family	F01G4.2	WBGene00000181
	Q18036	5	Q18036	-0.956963	-2.30917	0.395247	26.7958	0.145194	0.556421	mir-1(gk276) / N2			Uncharacterized protein	C16A3.5	WBGene00015810
	Q22866;A0A0K3AQS9;A0A0K3AUC0	68;41;32	Q22866	0.152305	-0.0630259	0.367636	35.1645	0.145395	0.556421	mir-1(gk276) / N2	lev-11	tmy-1	Tropomyosin isoforms a/b/d/f	Y105E8B.1	WBGene00002978
	Q19973	7	Q19973	0.498691	-0.208277	1.20566	28.859	0.14637	0.55865	mir-1(gk276) / N2	cec-5		C.Elegans Chromodomain protein	F32E10.6	WBGene00017993
	Q5CCJ3;Q5CCJ2;Q9N5N9	6;6;6	Q9N5N9	0.135131	-0.0565769	0.32684	27.716	0.146633	0.55865	mir-1(gk276) / N2			Putative rRNA methyltransferase	H06I04.3	WBGene00019168
	Q21276	13	Q21276	-0.401602	-0.972975	0.169771	27.786	0.147666	0.559194	mir-1(gk276) / N2	nol-56		Nucleolar protein 56	K07C5.4	WBGene00010627
	Q22993	18	Q22993	-0.277574	-0.672567	0.117419	29.6009	0.147738	0.559194	mir-1(gk276) / N2	pmt-2		Phosphoethanolamine MethylTransferase	F54D11.1	WBGene00018811
	Q9N4A7	6	Q9N4A7	-0.611569	-1.4819	0.258761	25.3723	0.147761	0.559194	mir-1(gk276) / N2	npp-20		Protein SEC13 homolog	Y77E11A.13	WBGene00003806
	Q9GRZ1;Q9GRZ0	8;7	Q9GRZ1	0.174435	-0.0740953	0.422966	28.704	0.148185	0.559554	mir-1(gk276) / N2	ebp-1		Microtubule End Binding Protein	Y59A8B.7	WBGene00013344
	Q8WSN3	4	Q8WSN3	-0.275024	-0.667354	0.117307	28.3579	0.148634	0.560007	mir-1(gk276) / N2	spp-17		SaPosin-like Protein family	C54G6.5	WBGene00005002
	P50305	14	P50305	1.55815	-0.66824	3.78453	24.7418	0.149228	0.560634	mir-1(gk276) / N2	sams-3		Probable S-adenosylmethionine synthase 3	C06E7.1	WBGene00015538
	M1ZJY1;Q03563	2;2	Q03563	-0.662304	-1.61026	0.285654	25.141	0.149849	0.560634	mir-1(gk276) / N2	spk-1	rsk-1 srk-1	Serine/threonine-protein kinase spk-1	B0464.5	WBGene00004980
	P34670	3	P34670	-0.713529	-1.73616	0.309103	24.5755	0.150334	0.560634	mir-1(gk276) / N2	snu-23		Putative zinc finger matrin-type protein snu-23	ZK686.4	WBGene00022794
	Q19087;A0A2K5ATU7	6;4	Q19087	-0.153761	-0.374237	0.0667153	27.5639	0.150509	0.560634	mir-1(gk276) / N2	dnpp-1		Aspartyl aminopeptidase	F01F1.9	WBGene00017163
	Q95008	9	Q95008	-0.253823	-0.617892	0.110246	29.1097	0.150623	0.560634	mir-1(gk276) / N2	pas-5		Proteasome subunit alpha type-5	F25H2.9	WBGene00003926
	Q21930	27	Q21930	0.258734	-0.112885	0.630354	34.9146	0.151122	0.560634	mir-1(gk276) / N2	rpl-28		60S ribosomal protein L28	R11D1.8	WBGene00004442
	Q2V4T0;O76836	5;5	O76836	0.192413	-0.0839551	0.468781	24.9408	0.151131	0.560634	mir-1(gk276) / N2			Uncharacterized protein	T19D12.4	WBGene00020579
	Q20224;Q20223	5;3	Q20224	-0.473691	-1.15466	0.207276	26.9853	0.151449	0.560634	mir-1(gk276) / N2	lbp-2		Fatty acid-binding protein homolog 2	F40F4.2	WBGene00002254
	O16486	4	O16486	0.237912	-0.104398	0.580222	26.8578	0.151763	0.560634	mir-1(gk276) / N2	natc-2		N-alpha-AcetylTransferase C complex subunit	B0238.10	WBGene00015074
	Q18446	3	Q18446	-0.370899	-0.90666	0.164863	24.7377	0.153214	0.561332	mir-1(gk276) / N2	mutd-1		Biogenesis of lysosome-related organelles complex 1 subunit 5	C34D4.13	WBGene00016404
	Q27874	8	Q27874	-0.884626	-2.16339	0.394135	25.3969	0.153481	0.561332	mir-1(gk276) / N2	pat-3		Integrin beta pat-3	ZK1058.2	WBGene00003930
	Q9GZH3;V6CIZ1;V6CLC6	7;6;6	Q9GZH3	-0.230251	-0.563225	0.102723	27.8802	0.153633	0.561332	mir-1(gk276) / N2			Inosine-5'-monophosphate dehydrogenase	T22D1.3	WBGene00020682
	Q10576	9	Q10576	-0.272584	-0.667064	0.121895	27.5411	0.153901	0.561332	mir-1(gk276) / N2	dpy-18	phy-1	Prolyl 4-hydroxylase subunit alpha-1	Y47D3B.10	WBGene00001077
	Q9GR61	3	Q9GR61	0.215204	-0.0963467	0.526755	26.33	0.154032	0.561332	mir-1(gk276) / N2	rpb-10		DNA-directed RNA polymerases I, II, and III subunit RPABC5	Y37E3.3	WBGene00021347
	Q93235	9	Q93235	-0.283456	-0.694049	0.127138	27.7856	0.154244	0.561332	mir-1(gk276) / N2	nkb-1		Sodium/potassium-transporting ATPase subunit beta-1	C17E4.9	WBGene00007646
	O02056	46	O02056	-0.441735	-1.08218	0.198707	32.9209	0.154578	0.561332	mir-1(gk276) / N2	rpl-4		60S ribosomal protein L4	B0041.4	WBGene00004415
	Q8WT52;L8E817;Q20005	3;3;3	Q20005	-0.485085	-1.18877	0.218597	24.4028	0.154783	0.561332	mir-1(gk276) / N2			Uncharacterized protein	F35A5.8	WBGene00001335
	Q19641	2	Q19641	0.344653	-0.155496	0.844802	25.9948	0.154918	0.561332	mir-1(gk276) / N2	exc-9		Uncharacterized protein	F20D12.5	WBGene00017644
	Q9BL03	18	Q9BL03	0.113363	-0.0517109	0.278437	30.9657	0.156192	0.56389	mir-1(gk276) / N2			NADH dehydrogenase [ubiquinone] 1 alpha subcomplex subunit 8	Y54F10AM.5	WBGene00021849
	Q07750	16	Q07750	-0.217789	-0.535176	0.0995977	29.4318	0.156488	0.56389	mir-1(gk276) / N2	unc-60		Actin-depolymerizing factor 1, isoforms a/b	C38C3.5	WBGene00006794
	G5EDG6	5	G5EDG6	-0.312899	-0.76905	0.143252	26.6175	0.156618	0.56389	mir-1(gk276) / N2	col-117	col-3	COLlagen	4J588_4J589_T28C6.4_T28C6.6	WBGene00000691_WBGene00000594
	Q09584	5	Q09584	0.450099	-0.208092	1.10829	26.8002	0.157769	0.566836	mir-1(gk276) / N2	rnp-7		RNP (RRM RNA binding domain) containing	K04G7.10	WBGene00004390
	P34685	15	P34685	0.163255	-0.0757017	0.402212	28.6837	0.158121	0.566905	mir-1(gk276) / N2	cap-1		F-actin-capping protein subunit alpha	D2024.6	WBGene00000292
	Q22288	4	Q22288	0.388145	-0.182886	0.959177	29.3592	0.160033	0.567958	mir-1(gk276) / N2	ttr-15		Transthyretin-like protein 15	T07C4.5	WBGene00011561
	Q965W4;Q8WTM3	2;2	Q965W4	0.618865	-0.291682	1.52941	25.2386	0.160068	0.567958	mir-1(gk276) / N2	comt-4		Catechol-O-MethylTransferase family	Y40B10A.6	WBGene00021491
	Q9GYF1	28	Q9GYF1	0.164071	-0.0774542	0.405596	33.3093	0.160262	0.567958	mir-1(gk276) / N2	unc-27	tni-2	Troponin I 2	ZK721.2	WBGene00006764
	P52015	21	P52015	-0.149549	-0.36977	0.0706706	32.9481	0.160385	0.567958	mir-1(gk276) / N2	cyn-7	cyp-7	Peptidyl-prolyl cis-trans isomerase 7	Y75B12B.2	WBGene00000883
	Q95QA6	31	Q95QA6	0.167971	-0.079637	0.415579	30.3242	0.160783	0.567958	mir-1(gk276) / N2	pat-12		Protein pat-12	T17H7.4	WBGene00003936
	P49029	3	P49029	-0.986824	-2.44368	0.470034	24.539	0.161345	0.567958	mir-1(gk276) / N2	mag-1		Protein mago nashi homolog	R09B3.5	WBGene00003123
	P91017	7	P91017	0.272233	-0.130543	0.675009	28.7525	0.162167	0.567958	mir-1(gk276) / N2	hpo-32		Uncharacterized protein	C01G8.6	WBGene00015313
	Q95NM6	2	Q95NM6	-0.329815	-0.817943	0.158313	24.7987	0.16229	0.567958	mir-1(gk276) / N2	cps-6		Endonuclease G, mitochondrial	C41D11.8	WBGene00000787
	P34500	10	P34500	0.207705	-0.100061	0.51547	30.0004	0.162735	0.567958	mir-1(gk276) / N2	ttr-2		Transthyretin-like protein 2	K03H1.4	WBGene00010539
	O16785	4	O16785	-0.22397	-0.555869	0.107929	24.8453	0.162773	0.567958	mir-1(gk276) / N2	pat-6		Paralyzed arrest at two-fold protein 6	T21D12.4	WBGene00003932
	P49181	23	P49181	0.157362	-0.0760423	0.390767	34.4398	0.163115	0.567958	mir-1(gk276) / N2	rpl-36		60S ribosomal protein L36	F37C12.4	WBGene00004450
	O02327	4	O02327	1.2703	-0.615365	3.15596	25.301	0.163421	0.567958	mir-1(gk276) / N2			Protein LTV1 homolog	T23D8.3	WBGene00011944
	O45815	25	O45815	-0.253015	-0.629017	0.122986	29.6449	0.163844	0.567958	mir-1(gk276) / N2	act-5		ACTin	T25C8.2	WBGene00000067
	Q10129	6	Q10129	0.565278	-0.274869	1.40542	25.0925	0.163888	0.567958	mir-1(gk276) / N2	mrps-16		Probable 28S ribosomal protein S16, mitochondrial	F56D1.3	WBGene00018961
	Q17401;Q17400;Q9NF70;Q9NF69;Q4R172	2;2;1;1;1	Q17400	-1.21268	-3.01821	0.59286	26.1576	0.164561	0.567958	mir-1(gk276) / N2	abu-1		Activated in Blocked Unfolded protein response	AC3.3	WBGene00000024
	O44411	21	O44411	-0.156435	-0.389527	0.0766573	29.2174	0.164854	0.567958	mir-1(gk276) / N2	nog-1		Nucleolar GTP-binding protein 1	T07A9.9	WBGene00020297
	P34462	7	P34462	0.16259	-0.0798211	0.405	28.8146	0.165086	0.567958	mir-1(gk276) / N2	vha-14		V-type proton ATPase subunit D	F55H2.2	WBGene00010130
	A0A2R8F5A8	5	A0A2R8F5A8	-0.874363	-2.17854	0.429813	26.9306	0.165249	0.567958	mir-1(gk276) / N2			Uncharacterized protein	F53G2.12	WBGene00302998
	Q688Z3	5	Q688Z3	0.815175	-0.401077	2.03143	24.4247	0.165362	0.567958	mir-1(gk276) / N2			Uncharacterized protein	Y94H6A.5	WBGene00022378
	H2KZA5;Q8ITY8	7;7	Q8ITY8	0.170193	-0.0838165	0.424201	26.5096	0.165481	0.567958	mir-1(gk276) / N2			Uncharacterized protein	R148.3	WBGene00020102
	P34666	5	P34666	0.815566	-0.402031	2.03316	24.849	0.165601	0.567958	mir-1(gk276) / N2	coq-5		2-methoxy-6-polyprenyl-1,4-benzoquinol methylase, mitochondrial	ZK652.9	WBGene00000765
	O18307	8	O18307	0.174092	-0.0862282	0.434411	28.9232	0.166204	0.567958	mir-1(gk276) / N2			Uncharacterized protein	ZK909.3	WBGene00014148
	O01806	39	O01806	0.133331	-0.0660978	0.33276	32.0692	0.166315	0.567958	mir-1(gk276) / N2	ssb-1		Sjogren Syndrome antigen B homolog	C44E4.4	WBGene00016653
	P43508	3	P43508	1.08665	-0.543722	2.71703	24.8505	0.167498	0.567958	mir-1(gk276) / N2	cpr-4		Cathepsin B-like cysteine proteinase 4	F44C4.3	WBGene00000784
	Q7Z2A9	7	Q7Z2A9	0.208028	-0.104189	0.520245	28.8378	0.167621	0.567958	mir-1(gk276) / N2	grd-13		GRounDhog (Hedgehog-like family)	W05E7.3	WBGene00001702
	G5EBS0	2	G5EBS0	0.779071	-0.390316	1.94846	23.1938	0.167662	0.567958	mir-1(gk276) / N2			Uncharacterized protein	C32H11.11_C32H11.8	WBGene00007874_WBGene00007871
	P91285	1	P91285	-0.200418	-0.501369	0.100533	25.9039	0.167819	0.567958	mir-1(gk276) / N2	dpy-5		Cuticle collagen dpy-5	F27C1.8	WBGene00001067
	P34255	15	P34255	-0.2191	-0.548527	0.110326	28.6298	0.168312	0.567958	mir-1(gk276) / N2			Uncharacterized protein B0303.3	B0303.3	WBGene00015125
	G5EDE4	7	G5EDE4	0.716285	-0.360838	1.79341	26.7036	0.168368	0.567958	mir-1(gk276) / N2			Uncharacterized protein	W08E3.2	WBGene00012343
	Q17974	4	Q17974	-0.72456	-1.81427	0.365153	24.4	0.16842	0.567958	mir-1(gk276) / N2	mma-1		Uncharacterized protein	C14C10.4	WBGene00007587
	Q9N4I4	18	Q9N4I4	-0.279727	-0.702198	0.142745	32.4658	0.170041	0.570575	mir-1(gk276) / N2	rpl-1	rpl-10a	60S ribosomal protein L10a	Y71F9AL.13	WBGene00004412
	Q9XUE5	18	Q9XUE5	-0.129824	-0.326251	0.0666025	27.9838	0.170736	0.570575	mir-1(gk276) / N2	noah-2		NOmpA Homolog (Drosophila nompA: no mechanoreceptor potential A)	F52B11.3	WBGene00009926
	D7SFI3;O45352;P34345	9;1;1	D7SFI3	0.187142	-0.0961188	0.470403	28.8601	0.170888	0.570575	mir-1(gk276) / N2			Uncharacterized protein	C02D5.4	WBGene00043097
	Q20754	3	Q20754	-0.807934	-2.03209	0.416218	26.019	0.171284	0.570575	mir-1(gk276) / N2	col-38		COLlagen	F54C9.4	WBGene00000615
	Q19615	2	Q19615	-0.76243	-1.92087	0.396013	25.4203	0.17237	0.570575	mir-1(gk276) / N2			Uncharacterized protein	F20A1.1	WBGene00017613
	Q86CZ7;A0A061AE99;A0A061AD47;H2L2L1;O18221	23;23;23;21;12	Q86CZ7	0.13582	-0.0707024	0.342342	29.0918	0.172665	0.570575	mir-1(gk276) / N2	tag-273		Uncharacterized protein	Y57G11A.1	WBGene00013289
	P61866	30	P61866	0.238313	-0.124391	0.601017	34.3298	0.173025	0.570575	mir-1(gk276) / N2	rpl-12		60S ribosomal protein L12	JC8.3	WBGene00004424
	Q20122	4	Q20122	-0.236513	-0.596802	0.123776	27.4155	0.173375	0.570575	mir-1(gk276) / N2			Acyl carrier protein	F37C12.3	WBGene00018151
	Q9U2P5;O17686	2;2	O17686	-0.966467	-2.44031	0.507378	25.092	0.173796	0.570575	mir-1(gk276) / N2	col-161		COLlagen	C50B6.4	WBGene00000734
	Q19830	6	Q19830	0.225853	-0.118655	0.570362	27.2457	0.173893	0.570575	mir-1(gk276) / N2			Uncharacterized protein	F26G1.5	WBGene00017841
	Q9U2T9;A0A0K3AS36;E6N0W0;E6N0W1;A0A0K3AUH0;A0A0K3ARL5	6;5;4;3;3;2	Q9U2T9	1.37846	-0.727248	3.48416	26.6401	0.174461	0.570575	mir-1(gk276) / N2	itsn-1		ITSN (Intersectin) family	Y116A8C.36	WBGene00006405
	Q9NA83	2	Q9NA83	0.287825	-0.151936	0.727585	26.8062	0.174536	0.570575	mir-1(gk276) / N2	rol-1		ROLler: helically twisted, animals roll when moving	Y57A10A.11	WBGene00004394
	O45181	27	O45181	0.223307	-0.117912	0.564525	31.8275	0.174574	0.570575	mir-1(gk276) / N2			Uncharacterized protein	K07H8.10	WBGene00019510
	G5EES9	4	G5EES9	-0.360072	-0.911019	0.190874	25.8607	0.175105	0.570575	mir-1(gk276) / N2	txl-1	txl	ThioredoXin-Like	Y54E10A.3	WBGene00021826
	Q21392	4	Q21392	-0.377651	-0.955508	0.200205	26.9687	0.175113	0.570575	mir-1(gk276) / N2			Uncharacterized protein	K09E2.3	WBGene00019572
	Q9U2S7;E8MDW0	4;4	Q9U2S7	0.184657	-0.0980187	0.467333	27.0835	0.175287	0.570575	mir-1(gk276) / N2			Uncharacterized protein	Y116A8C.30	WBGene00013807
	Q9NAB3;Q9BPM4;Q9NAA9	4;1;1	Q9NAB3	-0.777279	-1.96817	0.41361	26.4199	0.175623	0.570575	mir-1(gk276) / N2	gst-27		Glutathione S-Transferase	Y53F4B.30	WBGene00001775
	Q9XU56	5	Q9XU56	0.199606	-0.106287	0.505498	28.7321	0.175714	0.570575	mir-1(gk276) / N2	ensa-1		ENdoSulfine Alpha	K10C3.2	WBGene00010730
	G5EFH0	9	G5EFH0	-0.227499	-0.576259	0.12126	27.339	0.17585	0.570575	mir-1(gk276) / N2			Uncharacterized protein	W09C5.1	WBGene00012351
	O18650	28	O18650	0.237236	-0.127046	0.601518	35.2064	0.176492	0.570575	mir-1(gk276) / N2	rps-19		40S ribosomal protein S19	T05F1.3	WBGene00004488
	Q19064	5	Q19064	0.138518	-0.0742089	0.351244	27.5071	0.176546	0.570575	mir-1(gk276) / N2			Uncharacterized protein	E04F6.9	WBGene00017128
	A8WI97;Q9U1T6;L8E6L7;Q8I4B8;L8EC36;L8E811;Q8I4B9;Q9U1T5	10;9;8;7;7;5;2;2	A8WI97	0.147222	-0.0788842	0.373328	27.1098	0.176567	0.570575	mir-1(gk276) / N2			Uncharacterized protein	Y69H2.3	WBGene00013481
	Q9NAH4	6	Q9NAH4	0.193866	-0.104314	0.492047	28.3277	0.177143	0.571353	mir-1(gk276) / N2			Density-regulated protein homolog	Y47D3A.21	WBGene00012932
	Q23092	4	Q23092	-0.157268	-0.399651	0.0851151	26.6176	0.177945	0.572854	mir-1(gk276) / N2	lbp-4		Fatty acid-binding protein homolog 4	ZK742.5	WBGene00002256
	Q9U329	3	Q9U329	-1.16612	-2.96624	0.633988	26.9719	0.178573	0.572875	mir-1(gk276) / N2	cox-4		Cytochrome OXidase assembly protein	W09C5.8	WBGene00012354
	B5BM47;Q9XTY7	6;5	B5BM47	0.843019	-0.458855	2.14489	26.2802	0.178734	0.572875	mir-1(gk276) / N2			Uncharacterized protein	T03D8.6	WBGene00011393
	Q20711	7	Q20711	0.240349	-0.131458	0.612156	29.2384	0.17941	0.572875	mir-1(gk276) / N2			Uncharacterized protein	F53B3.6	WBGene00018744
	Q17475;Q17474	8;8	Q17474	-0.143761	-0.366214	0.0786921	26.5666	0.179521	0.572875	mir-1(gk276) / N2			Uncharacterized protein	B0334.3	WBGene00007143
	Q9N3Y1	2	Q9N3Y1	0.718324	-0.393512	1.83016	25.6475	0.179633	0.572875	mir-1(gk276) / N2			Uncharacterized protein	Y42H9AR.1	WBGene00021536
	Q27511	5	Q27511	0.139726	-0.076765	0.356217	29.6552	0.180036	0.573086	mir-1(gk276) / N2	htz-1		Histone H2A.V	R08C7.3	WBGene00019947
	Q27488	8	Q27488	-0.231131	-0.590116	0.127854	27.2056	0.180999	0.575076	mir-1(gk276) / N2	pas-2		Proteasome subunit alpha type-2	D1054.2	WBGene00003923
	G5EEG4	10	G5EEG4	0.176949	-0.0986512	0.45255	28.6003	0.182108	0.577523	mir-1(gk276) / N2	mce-1		Methylmalonyl-CoA Epimerase	D2030.5	WBGene00008415
	Q95QQ4;Q95QQ5;Q7JNV5	4;2;2	Q95QQ4	-0.430987	-1.10309	0.24112	25.9018	0.182606	0.577754	mir-1(gk276) / N2	atic-1		5-Aminoimidazole-4-carboxamide ribonucleotide formylTransferase/IMP Cyclohydrolase homolog	C55F2.1	WBGene00016957
	Q9N5B3	19	Q9N5B3	-0.274828	-0.703685	0.154029	30.5822	0.182859	0.577754	mir-1(gk276) / N2			Uncharacterized protein	W08E12.7	WBGene00021088
	G5EC87	12	G5EC87	0.146206	-0.0824484	0.374861	29.6061	0.183743	0.579471	mir-1(gk276) / N2			Uncharacterized protein	ZK1307.8	WBGene00014249
	Q21624	4	Q21624	0.640671	-0.362779	1.64412	26.3188	0.184337	0.580083	mir-1(gk276) / N2	cor-1		Coronin-like protein cor-1	R01H10.3	WBGene00000768
	Q9XWV2	2	Q9XWV2	-0.179327	-0.46059	0.101937	24.7547	0.184897	0.580083	mir-1(gk276) / N2			Putative phospholipase B-like 1	Y37D8A.2	WBGene00012544
	O16293;A0A164D3G3	5;5	O16293	0.800719	-0.456237	2.05768	25.9677	0.185239	0.580083	mir-1(gk276) / N2	fipp-1		Factor Interacting with Poly(A) Polymerase	F32D1.9	WBGene00017988
	G4RYA5	12	G4RYA5	-0.168606	-0.43332	0.0961087	25.73	0.1853	0.580083	mir-1(gk276) / N2			Uncharacterized protein	F38A1.8	WBGene00009521
	Q18231	5	Q18231	0.280103	-0.16008	0.720285	33.167	0.185678	0.580201	mir-1(gk276) / N2	rps-30		40S ribosomal protein S30	C26F1.4	WBGene00004499
	Q19191;H9G2S0;B6VQ74;H9G2R1;H9G2R0;H9G2R9;H9G2R5;H9G2R8;H9G2R2	10;8;6;5;5;4;3;3;3	Q19191	0.148595	-0.0853711	0.38256	30.0163	0.186448	0.580499	mir-1(gk276) / N2			Uncharacterized protein F08B12.4	F08B12.4	WBGene00008572
	O76367;Q9BHL9	8;1	O76367	0.136581	-0.0784731	0.351635	29.498	0.186455	0.580499	mir-1(gk276) / N2	cox-6c	cox-6C	Cytochrome OXidase assembly protein	F29C4.2	WBGene00017926
	K8FDX2;K8ESC3	61;34	K8FDX2	0.506626	-0.293597	1.30685	25.4998	0.187719	0.581823	mir-1(gk276) / N2	lev-11		Uncharacterized protein	Y105E8B.1	WBGene00002978
	Q21763	8	Q21763	-0.154332	-0.398203	0.0895379	28.6879	0.187884	0.581823	mir-1(gk276) / N2			Uncharacterized protein	R05H5.3	WBGene00011038
	O18000	15	O18000	-0.336456	-0.868333	0.19542	28.0638	0.188052	0.581823	mir-1(gk276) / N2	pes-9		Patterned Expression Site	R11H6.1	WBGene00003982
	Q5WRQ0;Q22515	15;15	Q22515	-0.171653	-0.443339	0.100032	27.8673	0.188545	0.581823	mir-1(gk276) / N2			Uncharacterized protein	T14G8.3	WBGene00011771
	Q9XXR4;H2KMI9	14;6	Q9XXR4	-0.150843	-0.389807	0.0881215	29.3786	0.188911	0.581823	mir-1(gk276) / N2	ttr-24		TransThyretin-Related family domain	Y51A2D.9	WBGene00013077
	Q95ZW2	5	Q95ZW2	0.303424	-0.178168	0.785017	26.8776	0.189674	0.581823	mir-1(gk276) / N2			Ribulose-phosphate 3-epimerase	F08F8.7	WBGene00017272
	Q9N4U5	4	Q9N4U5	0.235567	-0.138697	0.609831	25.2206	0.190078	0.581823	mir-1(gk276) / N2	smu-2		Smu-2 suppressor of mec-8 and unc-52 protein	Y49F6B.4	WBGene00004896
	O17606	2	O17606	-0.344587	-0.892211	0.203038	25.8014	0.190191	0.581823	mir-1(gk276) / N2			UPF0160 protein C27H6.8	C27H6.8_K08H10.8	WBGene00007787
	Q21284	6	Q21284	0.793566	-0.46822	2.05535	25.1752	0.190394	0.581823	mir-1(gk276) / N2			Uncharacterized protein	K07E3.4	WBGene00019492
	Q94045	3	Q94045	0.117601	-0.0694666	0.304669	27.1979	0.190567	0.581823	mir-1(gk276) / N2			Putative RNA polymerase II transcriptional coactivator	T13F2.2	WBGene00011743
	Q8I711;Q10039	13;12	Q8I711	-0.285678	-0.740187	0.16883	27.4571	0.190638	0.581823	mir-1(gk276) / N2	gars-1		Glycyl Amino-acyl tRNA Synthetase	T10F2.1	WBGene00001744
	O17586	16	O17586	-0.148353	-0.385901	0.0891957	28.6207	0.193247	0.585995	mir-1(gk276) / N2	pas-1		Proteasome subunit alpha type-6	C15H11.7	WBGene00003922
	G5EBY6	6	G5EBY6	0.176049	-0.106316	0.458415	28.18	0.193923	0.585995	mir-1(gk276) / N2	phf-5		PHF-5	Y54F10BM.14	WBGene00004016
	D0PV95	17	D0PV95	-0.236593	-0.616313	0.143128	29.1985	0.19419	0.585995	mir-1(gk276) / N2	laf-1		ATP-dependent RNA helicase laf-1	Y71H2AM.19	WBGene00002244
	Q9U2H9	18	Q9U2H9	-0.204721	-0.533317	0.123875	31.9015	0.194225	0.585995	mir-1(gk276) / N2	eef-1B.2		Probable elongation factor 1-beta/1-delta 2	Y41E3.10	WBGene00012768
	Q94312	4	Q94312	-0.754992	-1.96788	0.457897	24.0361	0.194582	0.585995	mir-1(gk276) / N2			Uncharacterized protein	ZK154.1	WBGene00022665
	Q9U229;K8ESD4	11;5	Q9U229	-0.169451	-0.442159	0.103257	27.7815	0.195311	0.585995	mir-1(gk276) / N2	wah-1		Worm AIF (Apoptosis inducing factor) Homolog	Y56A3A.32	WBGene00006937
	Q9XWG2	16	Q9XWG2	0.223419	-0.136271	0.583109	31.0536	0.195456	0.585995	mir-1(gk276) / N2			Uncharacterized protein	Y63D3A.7	WBGene00013406
	G5EC67	2	G5EC67	-0.693192	-1.81082	0.424435	24.6961	0.196053	0.585995	mir-1(gk276) / N2	2O16		2O16	Y54G9A.7	WBGene00013210
	P62784	11	P62784	-0.324948	-0.849008	0.199111	29.9864	0.196169	0.585995	mir-1(gk276) / N2	his-1; his-5; his-10; his-14; his-18; his-26; his-28; his-31; his-37; his-38; his-46; his-50; his-56; his-60; his-64; his-67		Histone H4	T10C6.14_F45F2.3_ZK131.4_ZK131.8_K06C4.10_ZK131.1_K06C4.2_F17E9.12_C50F4.7_K03A1.6_B0035.9_F07B7.9_F54E12.3_F55G1.11_F22B3.1_T23D8.5	WBGene00001920_WBGene00001911_WBGene00001924_WBGene00001905_WBGene00001938_WBGene00001879_WBGene00001930_WBGene00001934_WBGene00001912_WBGene00001892_WBGene00001902_WBGene00001875_WBGene00001941_WBGene00001900_WBGene00001884_WBGene00001888
	Q95Y11	5	Q95Y11	1.22296	-0.752501	3.19842	25.5326	0.196819	0.585995	mir-1(gk276) / N2			Uncharacterized protein	Y41D4B.11	WBGene00021514
	Q9GPA0;G5EF14	3;1	Q9GPA0	-0.808012	-2.11398	0.497956	25.1668	0.197063	0.585995	mir-1(gk276) / N2	uggt-1		UDP-Glucose Glycoprotein glucosylTransferase	F48E3.3	WBGene00018604
	Q9XW92	11	Q9XW92	-0.28237	-0.738839	0.1741	28.5027	0.197138	0.585995	mir-1(gk276) / N2	vha-13		V-type proton ATPase catalytic subunit A	Y49A3A.2	WBGene00013025
	Q9XXJ1	6	Q9XXJ1	0.333958	-0.206864	0.874779	25.5291	0.197864	0.585995	mir-1(gk276) / N2			Uncharacterized protein	Y17G7B.3	WBGene00012459
	P53585	8	P53585	-0.360556	-0.94461	0.223498	26.985	0.197975	0.585995	mir-1(gk276) / N2	acly-1		Probable ATP-citrate synthase	D1005.1	WBGene00016995
	Q9XWC2	4	Q9XWC2	0.154373	-0.0959075	0.404654	27.0155	0.19833	0.585995	mir-1(gk276) / N2			DOMON domain-containing protein Y73F4A.1	Y73F4A.1	WBGene00013514
	A0A1I6CM87;A0A1I6CM95;F3Y5Q3;F3Y5Q7;A0A1I6CM84;Q9XXC7;A0A1I6CM86;F3Y5Q4;F3Y5Q5	13;13;12;12;12;10;10;8;2	A0A1I6CM87	0.163814	-0.102145	0.429773	27.7277	0.198905	0.585995	mir-1(gk276) / N2	spat-2		Suppressor of PAr-Two defect	Y48A6B.13	WBGene00012973
	Q9N4B7;U4PMG8	3;1	Q9N4B7	0.509994	-0.318018	1.33801	24.3459	0.198913	0.585995	mir-1(gk276) / N2	rpc-11		DNA-directed RNA polymerase subunit	Y77E11A.6	WBGene00022309
	Q93637	27	Q93637	0.35766	-0.223142	0.938461	28.7067	0.198995	0.585995	mir-1(gk276) / N2	hpo-34		Uncharacterized protein	F29G6.3	WBGene00009259
	O17268	2	O17268	1.1419	-0.713736	2.99754	25.5996	0.199286	0.585995	mir-1(gk276) / N2	lmtr-5		Late endosomal/lysosomal adaptor, Mapk (MAPK) and mToR (MTOR) activator homolog	R148.2	WBGene00020101
	Q18040	8	Q18040	-0.143914	-0.378168	0.0903397	27.0574	0.199967	0.585995	mir-1(gk276) / N2	oatr-1		Probable ornithine aminotransferase, mitochondrial	C16A3.10	WBGene00015814
	O76577;P41883	8;2	O76577	-0.279084	-0.734179	0.176011	27.494	0.200712	0.585995	mir-1(gk276) / N2	rpn-11		26S proteasome non-ATPase regulatory subunit 14	K07D4.3	WBGene00004467
	P91349	7	P91349	0.181497	-0.114563	0.477557	26.3294	0.200847	0.585995	mir-1(gk276) / N2	spd-5		Spindle-defective protein 5	F56A3.4	WBGene00004955
	D5MCN2	39	D5MCN2	0.100361	-0.0635337	0.264256	30.7152	0.201313	0.585995	mir-1(gk276) / N2	larp-1		La-related protein 1	R144.7	WBGene00020097
	Q5FC36;Q9XV50	8;8	Q9XV50	-0.14724	-0.387771	0.0932907	28.0766	0.201451	0.585995	mir-1(gk276) / N2	pqn-32		Prion-like-(Q/N-rich)-domain-bearing protein	F29C12.1	WBGene00004120
	Q95XR1	8	Q95XR1	0.143698	-0.0910774	0.378472	28.4139	0.201506	0.585995	mir-1(gk276) / N2	tbca-1		Tubulin-specific chaperone A	Y39G10AR.20	WBGene00021475
	P90916	3	P90916	-0.194904	-0.513706	0.123898	26.7075	0.20198	0.585995	mir-1(gk276) / N2	lin-53	rba-2	Probable histone-binding protein lin-53	K07A1.12	WBGene00003036
	Q8I7H9	2	Q8I7H9	0.299035	-0.190736	0.788806	26.5135	0.202524	0.585995	mir-1(gk276) / N2	ttr-33		TransThyretin-Related family domain	C37C3.13	WBGene00016505
	P52717	12	P52717	-0.307489	-0.811522	0.196545	27.9097	0.202866	0.585995	mir-1(gk276) / N2			Uncharacterized serine carboxypeptidase F41C3.5	F41C3.5	WBGene00018271
	O76371	15	O76371	0.131754	-0.0845202	0.348028	29.7746	0.203449	0.585995	mir-1(gk276) / N2	rpt-5		26S protease regulatory subunit 6A	F56H1.4	WBGene00004505
	C1P636;Q27481;Q3S1J5	10;10;8	Q27481	-0.216976	-0.573537	0.139586	26.9993	0.20391	0.585995	mir-1(gk276) / N2	uba-1		UBA (Human ubiquitin) related	C47E12.5	WBGene00006699
	O45525;Q21817	4;1	O45525	-0.155099	-0.410041	0.0998424	27.2385	0.204012	0.585995	mir-1(gk276) / N2			Uncharacterized protein	F45H10.2	WBGene00009739
	Q27504	5	Q27504	0.183348	-0.118111	0.484808	28.0582	0.204128	0.585995	mir-1(gk276) / N2	cah-3		Putative carbonic anhydrase 3	K05G3.3	WBGene00000281
	Q20340	5	Q20340	-0.385506	-1.01955	0.248535	25.4737	0.204256	0.585995	mir-1(gk276) / N2			1,2-dihydroxy-3-keto-5-methylthiopentene dioxygenase	F42F12.4	WBGene00009636
	A0A1N7SYP6;Q95QW0;A0A1N7SYP7;A0A1N7SYR1	6;6;5;5	Q95QW0	-0.24434	-0.646237	0.157558	27.3507	0.204289	0.585995	mir-1(gk276) / N2	eif-3.L		Eukaryotic translation initiation factor 3 subunit L	C17G10.9	WBGene00015920
	Q9TYK1	4	Q9TYK1	0.171604	-0.110682	0.45389	28.9156	0.204328	0.585995	mir-1(gk276) / N2			Probable H/ACA ribonucleoprotein complex subunit 1-like protein	Y66H1A.4	WBGene00022046
	O62327;U4PB05;O02621	11;9;1	O62327	0.179234	-0.115649	0.474118	29.549	0.204393	0.585995	mir-1(gk276) / N2	gpx-2		Glutathione peroxidase 2	R05H10.5	WBGene00011045
	Q95ZQ3;Q22099;Q2XN16	15;15;11	Q22099	-0.323274	-0.856803	0.210255	27.6865	0.205693	0.587558	mir-1(gk276) / N2	kars-1	krs-1	Lysine--tRNA ligase	T02G5.9	WBGene00002238
	G5EFG4	6	G5EFG4	-0.702004	-1.86071	0.4567	27.1106	0.205737	0.587558	mir-1(gk276) / N2	abcf-2		ABC transporter, class F	T27E9.7	WBGene00012097
	Q20780;Q8IG19;Q9TXM0	24;18;3	Q20780	-0.151981	-0.403152	0.0991898	30.3384	0.206261	0.587558	mir-1(gk276) / N2	alh-1		ALdehyde deHydrogenase	F54D8.3	WBGene00000107
	G5EF05;K8F7V7	4;4	G5EF05	-0.398111	-1.05668	0.260455	25.852	0.20666	0.587558	mir-1(gk276) / N2			Uncharacterized protein	W07E11.1	WBGene00012326
	Q9N3I1	5	Q9N3I1	-0.351855	-0.933907	0.230197	27.192	0.206663	0.587558	mir-1(gk276) / N2			Uncharacterized protein	Y51H7C.13	WBGene00021791
	Q9U2G0	6	Q9U2G0	-0.236422	-0.628687	0.155844	25.9039	0.207907	0.590109	mir-1(gk276) / N2	snrp-200		Putative U5 small nuclear ribonucleoprotein 200 kDa helicase	Y46G5A.4	WBGene00012896
	P91454	4	P91454	0.20122	-0.133243	0.535683	27.8532	0.208661	0.590421	mir-1(gk276) / N2	dnj-21	tim-14	Mitochondrial import inner membrane translocase subunit TIM14	T19B4.4	WBGene00001039
	O45622;E9P8A2	5;1	O45622	-0.193694	-0.515685	0.128297	26.5506	0.20871	0.590421	mir-1(gk276) / N2	erfa-3		Eukaryotic Release FActor homolog	H19N07.1	WBGene00010405
	Q9N5E4	10	Q9N5E4	0.223397	-0.14883	0.595625	31.6309	0.209677	0.592173	mir-1(gk276) / N2			Uncharacterized protein	T02H6.11	WBGene00020181
	Q20206	31	Q20206	-0.185766	-0.496083	0.12455	33.6957	0.210747	0.592305	mir-1(gk276) / N2	rps-11		Ribosomal Protein, Small subunit	F40F11.1	WBGene00004480
	Q9N361	7	Q9N361	-0.159602	-0.426501	0.107297	27.3361	0.211202	0.592305	mir-1(gk276) / N2	mrps-25		Probable 28S ribosomal protein S25, mitochondrial	Y55F3AM.1	WBGene00021920
	Q9XVU5	3	Q9XVU5	0.179359	-0.121433	0.480151	26.9361	0.212397	0.592305	mir-1(gk276) / N2			Uncharacterized protein	F15B9.8	WBGene00008851
	Q2L6Y6;H2L001	5;4	Q2L6Y6	-0.163433	-0.437556	0.110689	26.3357	0.212456	0.592305	mir-1(gk276) / N2	hsp-75		Heat Shock Protein	R151.7	WBGene00020110
	A0A168H9W7;Q86S28;Q76NP4;O61907	8;8;8;8	O61907	0.14158	-0.0959468	0.379107	26.3624	0.212559	0.592305	mir-1(gk276) / N2	lin-40		Uncharacterized protein	T27C4.4	WBGene00003025
	Q20496	7	Q20496	0.125538	-0.0850891	0.336166	26.5206	0.212586	0.592305	mir-1(gk276) / N2	rhi-1		Probable rho GDP-dissociation inhibitor	F46H6.1	WBGene00004356
	Q9XW83	3	Q9XW83	-0.610244	-1.63463	0.414143	25.2902	0.212801	0.592305	mir-1(gk276) / N2	grl-15		GRound-Like (Grd related)	Y75B8A.20	WBGene00001724
	Q20932	3	Q20932	0.421754	-0.28645	1.12996	25.6526	0.212936	0.592305	mir-1(gk276) / N2	byn-1		Cell adhesion protein byn-1	F57B9.5	WBGene00000276
	P41880	2	P41880	0.289652	-0.19686	0.776163	29.2253	0.21305	0.592305	mir-1(gk276) / N2			Uncharacterized protein F37A4.2	F37A4.2	WBGene00018132
	Q6A582;K8ERX1;Q21605;K8FE02	13;13;13;13	Q21605	0.185814	-0.1264	0.498029	27.7724	0.213202	0.592305	mir-1(gk276) / N2	imph-1	zbp-1	IMP Homolog	M88.5	WBGene00010908
	O01504	11	O01504	0.157804	-0.108331	0.423938	33.578	0.214767	0.59568	mir-1(gk276) / N2			60S acidic ribosomal protein P2	C37A2.7	WBGene00016493
	Q18494	13	Q18494	-0.184028	-0.494927	0.12687	26.7688	0.215496	0.596302	mir-1(gk276) / N2	maph-1.3		Microtubule-Associated Protein Homolog	C36A4.5	WBGene00007966
	P54688	9	P54688	-0.275904	-0.742234	0.190425	26.7537	0.215691	0.596302	mir-1(gk276) / N2	bcat-1	eca-39 eca39	Branched-chain-amino-acid aminotransferase, cytosolic	K02A4.1	WBGene00001149
	Q9N336	5	Q9N336	0.152008	-0.105959	0.409974	26.8098	0.217411	0.598524	mir-1(gk276) / N2			Uncharacterized protein	Y57E12AL.6	WBGene00021959
	Q9N4J8	16	Q9N4J8	-0.15296	-0.412554	0.106633	29.4368	0.217428	0.598524	mir-1(gk276) / N2	cct-3		T-complex protein 1 subunit gamma	F54A3.3	WBGene00018782
	Q17754	2	Q17754	0.275054	-0.192496	0.742604	27.6869	0.218107	0.598524	mir-1(gk276) / N2	tin-9.1	tim9a tin-9	Mitochondrial import inner membrane translocase subunit Tim9	C06G3.11	WBGene00006572
	P91027	12	P91027	0.163558	-0.114497	0.441613	30.2109	0.218155	0.598524	mir-1(gk276) / N2	chdp-1		Calponin Homology Domain containing Protein	C10G11.7	WBGene00015687
	Q09261	4	Q09261	-0.468562	-1.26762	0.330499	25.793	0.219479	0.598524	mir-1(gk276) / N2	mrps-31		28S ribosomal protein S31, mitochondrial	C32A3.2	WBGene00007859
	Q4JFH6;Q18276	10;10	Q18276	-0.127148	-0.344112	0.0898163	28.4353	0.21974	0.598524	mir-1(gk276) / N2	spp-10		SaPosin-like Protein family	C28C12.7	WBGene00004995
	O17694	7	O17694	-0.218353	-0.590999	0.154294	28.7351	0.219798	0.598524	mir-1(gk276) / N2	ril-1		RNAi-Induced Longevity	C53A5.1	WBGene00008262
	O16214	3	O16214	0.203642	-0.144531	0.551816	26.5079	0.220572	0.598524	mir-1(gk276) / N2			Uncharacterized protein	F17A9.4	WBGene00017536
	O45110;U4PFC3	3;2	O45110	-0.150937	-0.409238	0.107363	25.8919	0.220965	0.598524	mir-1(gk276) / N2	mrpl-2		Mitochondrial Ribosomal Protein, Large	F56B3.8	WBGene00018932
	A0A0K3AYJ1;Q19698;O76358	17;17;1	Q19698	0.128871	-0.0917717	0.349513	32.5083	0.221167	0.598524	mir-1(gk276) / N2	ilys-5		Invertebrate LYSozyme	F22A3.6	WBGene00017691
	Q94230;Q93537	19;3	Q94230	-0.170745	-0.463112	0.121623	30.0695	0.221213	0.598524	mir-1(gk276) / N2	plp-1		Pur alpha Like Protein	F45E4.2	WBGene00004046
	O02495	7	O02495	0.177971	-0.126847	0.482789	28.0552	0.221321	0.598524	mir-1(gk276) / N2	snb-1		Synaptobrevin-1	T10H9.4	WBGene00004897
	Q19869	33	Q19869	0.302969	-0.217189	0.823128	35.043	0.222349	0.598524	mir-1(gk276) / N2	rpl-26		60S ribosomal protein L26	F28C6.7	WBGene00004440
	G5ED95	10	G5ED95	0.127787	-0.0917168	0.347291	27.3987	0.222563	0.598524	mir-1(gk276) / N2	yars-1	yrs-2	Tyrosine--tRNA ligase	Y105E8A.19	WBGene00013677
	P90983	18	P90983	0.232202	-0.166793	0.631196	34.5981	0.222707	0.598524	mir-1(gk276) / N2	rps-29		Ribosomal Protein, Small subunit	B0412.4	WBGene00004498
	Q20815	2	Q20815	-0.489058	-1.33054	0.352424	24.3607	0.223281	0.598524	mir-1(gk276) / N2	ssp-35		Sperm Specific family, class P	F55C5.1	WBGene00010091
	O45713	7	O45713	0.206711	-0.149113	0.562535	34.6405	0.223466	0.598524	mir-1(gk276) / N2	rbm-3.2		RNA Binding Motif protein homolog	R09B3.3	WBGene00011156
	O45781	3	O45781	0.672901	-0.485792	1.83159	26.7964	0.223609	0.598524	mir-1(gk276) / N2	drr-2		Dietary Restriction Response (WT but not eat-2 lifespan increased)	T12D8.2	WBGene00011730
	O45734;H9G333	15;12	O45734	-0.140447	-0.3828	0.101906	30.2172	0.224514	0.598524	mir-1(gk276) / N2	cpl-1		CathePsin L family	T03E6.7	WBGene00000776
	Q19706	8	Q19706	0.113201	-0.0822319	0.308633	28.9123	0.224723	0.598524	mir-1(gk276) / N2	eif-3.G		Eukaryotic translation initiation factor 3 subunit G	F22B5.2	WBGene00001230
	P91340	3	P91340	-0.968548	-2.64079	0.703689	25.2734	0.224752	0.598524	mir-1(gk276) / N2			Uncharacterized protein	F55F8.2	WBGene00018890
	Q21568	12	Q21568	0.135436	-0.0986175	0.369489	31.4818	0.225151	0.598524	mir-1(gk276) / N2			NHP2-like protein 1 homolog	M28.5	WBGene00010896
	Q965S8	3	Q965S8	-0.572283	-1.56392	0.419357	26.5265	0.226299	0.598524	mir-1(gk276) / N2	eif-3.I		Eukaryotic translation initiation factor 3 subunit I	Y74C10AR.1	WBGene00001232
	Q20363	7	Q20363	-0.331702	-0.906884	0.24348	29.3321	0.22661	0.598524	mir-1(gk276) / N2	sip-1		Stress-induced protein 1	F43D9.4	WBGene00004798
	Q20049	5	Q20049	-0.112607	-0.307949	0.0827348	28.159	0.22678	0.598524	mir-1(gk276) / N2	idhg-1		Isocitrate dehydrogenase [NAD] subunit, mitochondrial	F35G12.2	WBGene00009440
	Q18012	10	Q18012	0.122195	-0.0899045	0.334295	30.2036	0.227033	0.598524	mir-1(gk276) / N2			Uncharacterized protein	C15C7.5	WBGene00015791
	G4S035;G5ED15	4;2	G4S035	-1.22943	-3.36392	0.905067	25.8468	0.227139	0.598524	mir-1(gk276) / N2			Uncharacterized protein	K10B3.1	WBGene00019609
	Q18680	19	Q18680	-0.151674	-0.415182	0.111835	29.8893	0.227428	0.598524	mir-1(gk276) / N2	pyp-1		Inorganic pyrophosphatase 1	C47E12.4	WBGene00008149
	P34540;E9P841	16;6	P34540	0.0951198	-0.0703259	0.260565	28.6283	0.227924	0.598524	mir-1(gk276) / N2	unc-116	khc-1	Kinesin heavy chain	R05D3.7	WBGene00006840
	Q21824	15	Q21824	-0.130842	-0.358436	0.0967517	30.1935	0.227952	0.598524	mir-1(gk276) / N2	prdx-3		Probable peroxiredoxin prdx-3	R07E5.2	WBGene00011110
	Q20276	3	Q20276	0.203255	-0.150339	0.556849	28.9712	0.228002	0.598524	mir-1(gk276) / N2	fip-5		Fungus-Induced Protein	F41E7.4	WBGene00009620
	Q9BMU4;U4PLG5;Q688Z6;U4PQS6	6;4;4;2	Q9BMU4	-0.881016	-2.41389	0.651856	25.1789	0.22806	0.598524	mir-1(gk276) / N2	atln-1	4D561	ATLastiN (Endoplasmic reticulum GTPase) related	Y54G2A.2	WBGene00021868
	Q21826	5	Q21826	0.224241	-0.165944	0.614426	26.4816	0.228093	0.598524	mir-1(gk276) / N2	pdcd-2		PDCD (Mammalian ProgrammeD Cell Death protein) homolog	R07E5.10	WBGene00011116
	Q23120	16	Q23120	0.233644	-0.173571	0.640859	29.9871	0.2288	0.599185	mir-1(gk276) / N2	rsp-2	srp-4	Probable splicing factor, arginine/serine-rich 2	W02B12.2	WBGene00004699
	Q09165;Q8MQ08	23;22	Q09165	0.164883	-0.122655	0.45242	28.5054	0.229048	0.599185	mir-1(gk276) / N2	dig-1		Mesocentin	K07E12.1	WBGene00000998
	A5HU98;P91425	6;6	P91425	0.221015	-0.165072	0.607102	27.1587	0.229787	0.600196	mir-1(gk276) / N2	guk-1		GUanylate Kinase	T03F1.8	WBGene00020190
	O01833;O16277	14;2	O01833	0.310875	-0.233044	0.854795	30.1291	0.230468	0.601052	mir-1(gk276) / N2	hil-5		Histone H1.5	B0414.3	WBGene00001856
	Q9UA63	4	Q9UA63	0.806398	-0.607147	2.21994	24.9726	0.231275	0.602065	mir-1(gk276) / N2	mrpl-30		Mitochondrial Ribosomal Protein, Large	W04B5.4	WBGene00021021
	O45712	3	O45712	0.226891	-0.171094	0.624875	29.525	0.231564	0.602065	mir-1(gk276) / N2	rbm-3.1		RNA Binding Motif protein homolog	R09B3.2	WBGene00011155
	Q20053	6	Q20053	-0.293188	-0.808842	0.222466	26.1802	0.232721	0.603943	mir-1(gk276) / N2	asb-1		ATP Synthase B homolog	F35G12.10	WBGene00000206
	Q9BL46	6	Q9BL46	-0.280764	-0.775675	0.214146	25.9308	0.233691	0.603943	mir-1(gk276) / N2			Uncharacterized protein	Y71H2AM.11	WBGene00022176
	O17759	38	O17759	-0.0985545	-0.272662	0.0755528	32.7472	0.234646	0.603943	mir-1(gk276) / N2	tkt-1		TransKeTolase homolog	F01G10.1	WBGene00008506
	G5EFV4	10	G5EFV4	0.105504	-0.0813266	0.292335	31.6865	0.235684	0.603943	mir-1(gk276) / N2	hmg-1.1		HMG	Y48B6A.14	WBGene00001971
	Q17512	7	Q17512	-0.984997	-2.72943	0.759433	26.1427	0.235724	0.603943	mir-1(gk276) / N2			Uncharacterized protein	B0491.5	WBGene00007192
	A5JYU1	3	A5JYU1	-0.972338	-2.69436	0.749681	24.4984	0.235726	0.603943	mir-1(gk276) / N2	coa-6		Cytochrome Oxidase Assembly subunits	ZC434.7	WBGene00013893
	H2KYL8;H2KYL7;B9WRS6;H2KYL9	8;6;6;4	H2KYL8	-1.1857	-3.28779	0.916396	25.2359	0.236184	0.603943	mir-1(gk276) / N2	tnt-3		TropoNin T	C14F5.3	WBGene00006588
	Q09508	19	Q09508	-0.152185	-0.42256	0.118191	28.8783	0.237103	0.603943	mir-1(gk276) / N2	sdha-1		Succinate dehydrogenase [ubiquinone] flavoprotein subunit, mitochondrial	C03G5.1/D2021.3	WBGene00015391
	Q95XS2	4	Q95XS2	-0.13382	-0.37161	0.103971	30.8883	0.237182	0.603943	mir-1(gk276) / N2			Protein transport protein Sec61 subunit beta	Y38F2AR.9	WBGene00021427
	Q9TXY8	3	Q9TXY8	0.127114	-0.0987827	0.35301	28.0984	0.237224	0.603943	mir-1(gk276) / N2	trx-4		Thioredoxin	Y44E3A.3	WBGene00021548
	P91134	8	P91134	-0.144825	-0.402409	0.112758	27.4793	0.237581	0.603943	mir-1(gk276) / N2	adss-1		Adenylosuccinate synthetase	C37H5.6	WBGene00016509
	P34329	20	P34329	-0.15094	-0.41942	0.117539	29.7088	0.237614	0.603943	mir-1(gk276) / N2			Probable protein disulfide-isomerase A4	C14B9.2	WBGene00015752
	G5ECC9	3	G5ECC9	-0.517015	-1.43758	0.403552	24.3766	0.238062	0.603943	mir-1(gk276) / N2			Uncharacterized protein	K11B4.1	WBGene00010766
	Q18212	16	Q18212	-0.253353	-0.704622	0.197917	30.3577	0.23822	0.603943	mir-1(gk276) / N2	hel-1		Spliceosome RNA helicase DDX39B homolog	C26D10.2	WBGene00001840
	G5EF87;H8ESF3;H8ESF4	10;10;9	G5EF87	0.118437	-0.0928898	0.329763	27.7376	0.23898	0.603943	mir-1(gk276) / N2	swsn-1	psa-1	SWI/SNF nucleosome remodeling complex component	Y113G7B.23	WBGene00004203
	Q17490	58	Q17490	-0.111365	-0.310345	0.0876153	30.0326	0.239577	0.603943	mir-1(gk276) / N2	unc-44		Uncharacterized protein	B0350.2	WBGene00006780
	Q18074	13	Q18074	0.138418	-0.10919	0.386026	29.74	0.240089	0.603943	mir-1(gk276) / N2			Uncharacterized protein	C18B2.3	WBGene00015954
	O18178	4	O18178	-0.438579	-1.22405	0.346888	23.9412	0.240601	0.603943	mir-1(gk276) / N2	pptr-1		Serine/threonine-protein phosphatase 2A regulatory subunit pptr-1	W08G11.4	WBGene00012348
	Q95PZ1	7	Q95PZ1	0.115924	-0.0918903	0.323739	28.2431	0.241025	0.603943	mir-1(gk276) / N2	kdp-1		KASH (Klarsicht/ANC-1/Syne Homology) Domain Protein	Y67H2A.5	WBGene00013463
	P09446	65	P09446	-0.185872	-0.519276	0.147533	34.3977	0.241284	0.603943	mir-1(gk276) / N2	hsp-1	hsp70a	Heat shock 70 kDa protein A	F26D10.3	WBGene00002005
	Q93714	15	Q93714	-0.229199	-0.640536	0.182138	28.7892	0.241513	0.603943	mir-1(gk276) / N2	idha-1		Probable isocitrate dehydrogenase [NAD] subunit alpha, mitochondrial	F43G9.1	WBGene00009664
	Q9U2X0	4	Q9U2X0	-0.117051	-0.32712	0.093018	27.106	0.241514	0.603943	mir-1(gk276) / N2	prmt-1	epg-11	Protein arginine N-methyltransferase 1	Y113G7B.17	WBGene00013766
	O01615	11	O01615	0.132921	-0.105661	0.371503	28.3056	0.241572	0.603943	mir-1(gk276) / N2			Acidic leucine-rich nuclear phosphoprotein 32-related protein 2	T19H12.2	WBGene00020588
	P34661	4	P34661	-0.241039	-0.674247	0.192168	27.0689	0.24214	0.603943	mir-1(gk276) / N2	ufm-1	tag-277	Ubiquitin-fold modifier 1	ZK652.3	WBGene00044324
	P30625	11	P30625	-0.12968	-0.362816	0.103456	28.9861	0.24227	0.603943	mir-1(gk276) / N2	kin-2	kin-a	cAMP-dependent protein kinase regulatory subunit	R07E4.6	WBGene00002190
	D9PTN8;B7FAR9;Q8I4D3	30;30;15	B7FAR9	-0.101494	-0.284012	0.0810245	30.2825	0.242401	0.603943	mir-1(gk276) / N2			Uncharacterized protein	Y43F8B.1	WBGene00012812
	Q23205	7	Q23205	0.219401	-0.175164	0.613967	26.3933	0.242414	0.603943	mir-1(gk276) / N2	tag-267		Uncharacterized protein	W06E11.2	WBGene00044318
	O16226;O16225	3;2	O16226	0.239277	-0.191445	0.669998	27.57	0.242834	0.603943	mir-1(gk276) / N2			Uncharacterized protein	C49G7.3	WBGene00016781
	A0A2K5ATU5;Q09285;A0A2K5ATV3;A0A2K5ATU1	9;9;8;7	Q09285	0.11254	-0.090349	0.315428	27.5467	0.243496	0.603943	mir-1(gk276) / N2	akap-1		KH domain-containing protein akap-1	C56G2.1	WBGene00016977
	Q9BL19	27	Q9BL19	-0.141991	-0.398262	0.11428	34.0989	0.243986	0.603943	mir-1(gk276) / N2	rpl-17		60S ribosomal protein L17	Y48G8AL.8	WBGene00004429
	Q9GUP2;U4PRN6;U4PBX5;U4PBK1;U4PBJ5;U4PMD1;U4PES6;U4PBY0	13;13;13;13;12;12;12;12	Q9GUP2	0.15927	-0.128329	0.446869	28.1761	0.244203	0.603943	mir-1(gk276) / N2	eel-1		Enhancer of EfL-1 mutant phenotype	Y67D8C.5	WBGene00022069
	G8JY31;Q21268	3;3	Q21268	-0.154804	-0.434339	0.12473	24.7699	0.244203	0.603943	mir-1(gk276) / N2			UPF0046 protein K07C11.7	K07C11.7	WBGene00019479
	P48162	16	P48162	-0.225398	-0.632443	0.181648	31.6969	0.244244	0.603943	mir-1(gk276) / N2	rpl-25.1		60S ribosomal protein L23a 1	F55D10.2	WBGene00004438
	Q9XVH6	2	Q9XVH6	0.381691	-0.308168	1.07155	25.4411	0.244602	0.603943	mir-1(gk276) / N2	rpb-11		Probable DNA-directed RNA polymerase II subunit RPB11	W01G7.3	WBGene00012187
	P30642	15	P30642	-0.495599	-1.39313	0.401929	27.4377	0.245481	0.603943	mir-1(gk276) / N2	eif-3.D		Eukaryotic translation initiation factor 3 subunit D	R08D7.3	WBGene00001227
	G5ED33;A0A061ACP8;O18250;A0A061ADW6;Q7YTG2;A0A061AJ42;Q7YTG1;A0A061ACM2;G5EFE0;A0A061AKT4	23;23;22;22;21;21;21;21;14;7	G5ED33	0.138088	-0.11212	0.388296	28.9681	0.245712	0.603943	mir-1(gk276) / N2	eps-8		EPS (Human endocytosis) related	Y57G11C.24	WBGene00001330
	O02482	3	O02482	0.681535	-0.553568	1.91664	24.5714	0.245782	0.603943	mir-1(gk276) / N2	unc-37	esg	Transcription factor unc-37	W02D3.9	WBGene00006773
	P91180;Q95Q60	21;21	P91180	-0.143408	-0.403306	0.11649	31.225	0.245796	0.603943	mir-1(gk276) / N2	fkb-5		Peptidylprolyl isomerase	C50F2.6	WBGene00001430
	P17139	4	P17139	-0.151853	-0.427757	0.12405	27.6084	0.246914	0.603943	mir-1(gk276) / N2	emb-9	clb-2	Collagen alpha-1(IV) chain	K04H4.1	WBGene00001263
	G5EF32;Q86S16	110;30	G5EF32	0.0894378	-0.0730977	0.251973	33.6467	0.247009	0.603943	mir-1(gk276) / N2	npa-1		Nematode Polyprotein Allergen related	5H561_VC5.3	WBGene00003786
	Q9XVS2	4	Q9XVS2	-0.874599	-2.46411	0.714914	25.0385	0.247037	0.603943	mir-1(gk276) / N2	sup-46		SUPpressor	C25A1.4	WBGene00045383
	P90904	7	P90904	0.121465	-0.0993846	0.342315	27.3065	0.24723	0.603943	mir-1(gk276) / N2			Uncharacterized protein	K02B12.7	WBGene00010500
	Q95XG6	5	Q95XG6	-0.275326	-0.776276	0.225623	28.3298	0.247535	0.603943	mir-1(gk276) / N2			Uncharacterized protein	Y69A2AR.3	WBGene00022075
	Q9XXU9	7	Q9XXU9	-0.289696	-0.817284	0.237892	26.5433	0.247947	0.604084	mir-1(gk276) / N2	vha-11		V-type proton ATPase subunit C	Y38F2AL.3	WBGene00006920
	Q9U207;A5PEX6;K8ESL3;G2HK02;G2HK03	14;14;14;13;13	Q9U207	0.101692	-0.0837947	0.287179	27.4882	0.248629	0.604879	mir-1(gk276) / N2	pqn-87		Prion-like-(Q/N-rich)-domain-bearing protein	Y57A10A.18	WBGene00004167
	G5ECL3	8	G5ECL3	0.169096	-0.139862	0.478055	27.3408	0.249381	0.605714	mir-1(gk276) / N2	prp-21	Ceprp21	Pre-RNA processing 21	W07E6.4	WBGene00004188
	O02153	6	O02153	0.162907	-0.134948	0.460762	29.3869	0.249684	0.605714	mir-1(gk276) / N2	grd-14		GRounDhog (Hedgehog-like family)	T01B10.2	WBGene00001703
	Q967F1	7	Q967F1	0.16724	-0.138801	0.473282	29.5508	0.250065	0.605776	mir-1(gk276) / N2	eif-1		Eukaryotic Initiation Factor	T27F7.3	WBGene00020868
	Q21210	4	Q21210	-0.64799	-1.83612	0.540143	26.1489	0.250937	0.60619	mir-1(gk276) / N2			Uncharacterized protein	K04C2.2	WBGene00019380
	Q22494	9	Q22494	0.118528	-0.0989486	0.336005	28.4819	0.251236	0.60619	mir-1(gk276) / N2	vha-15		Probable V-type proton ATPase subunit H 2	T14F9.1	WBGene00020507
	O02640	34	O02640	0.127183	-0.106209	0.360576	33.7962	0.251304	0.60619	mir-1(gk276) / N2	mdh-2		Probable malate dehydrogenase, mitochondrial	F20H11.3	WBGene00003162
	Q09629	5	Q09629	0.241784	-0.202428	0.685996	27.4175	0.251817	0.606569	mir-1(gk276) / N2			Probable adenylate kinase isoenzyme ZK673.2	ZK673.2	WBGene00014058
	Q19133	4	Q19133	0.297135	-0.249748	0.844019	26.7469	0.252609	0.607617	mir-1(gk276) / N2			Ribokinase	F07A11.5	WBGene00008548
	Q19989	5	Q19989	0.38799	-0.329332	1.10531	25.0574	0.254601	0.610619	mir-1(gk276) / N2	golg-2		GOLGi associated coiled-coil protein homolog	F33G12.5	WBGene00018017
	C1P659;B9WRT9;C1P658;H9G336;C1P660;H9G334;H9G335;O45881	99;99;98;94;76;75;75;72	B9WRT9	0.178832	-0.151811	0.509475	31.8483	0.254622	0.610619	mir-1(gk276) / N2	mlt-11		Uncharacterized protein	W01F3.3	WBGene00012186
	P47208	20	P47208	-0.18757	-0.534903	0.159763	30.0087	0.255305	0.610619	mir-1(gk276) / N2	cct-4		T-complex protein 1 subunit delta	K01C8.10	WBGene00000379
	Q19842	36	Q19842	-0.0948667	-0.270744	0.081011	30.6963	0.255829	0.610619	mir-1(gk276) / N2	pcca-1		Propionyl-CoA carboxylase alpha chain, mitochondrial	F27D9.5	WBGene00017864
	Q966C7;Q8T876	12;9	Q966C7	0.343429	-0.293399	0.980258	28.5283	0.25592	0.610619	mir-1(gk276) / N2	tald-1		Transaldolase	Y24D9A.8	WBGene00021286
	O61749	5	O61749	0.141181	-0.120667	0.403029	28.7016	0.256008	0.610619	mir-1(gk276) / N2			Probable signal recognition particle 19 kDa protein	F37F2.2	WBGene00018159
	Q23543	4	Q23543	-1.07472	-3.07184	0.922404	26.3942	0.256865	0.610798	mir-1(gk276) / N2	lsm-7		LSM Sm-like protein	ZK593.7	WBGene00003081
	C6KRG1;H2KZY6	3;3	C6KRG1	-0.500627	-1.43105	0.429801	24.7793	0.256924	0.610798	mir-1(gk276) / N2	marg-1		Pharyngeal MARGginal cell marker	F47B7.7	WBGene00018538
	Q27535;P91251	12;1	Q27535	-0.204965	-0.586381	0.176452	28.8186	0.257489	0.610798	mir-1(gk276) / N2			Probable arginine kinase ZC434.8	ZC434.8	WBGene00013894
	Q8WSN6;G5EDE7	4;4	Q8WSN6	0.405418	-0.349332	1.16017	25.3677	0.257673	0.610798	mir-1(gk276) / N2	tpxl-1		TPX2 (Targeting Protein for Xenopus Klp2)-Like	1C866_Y39G10AR.12	WBGene00021470
	Q27274	6	Q27274	-0.54621	-1.56449	0.472075	25.9809	0.258297	0.610798	mir-1(gk276) / N2	rop-1		60 kDa SS-A/Ro ribonucleoprotein homolog	C12D8.11	WBGene00004405
	Q19230	2	Q19230	-0.518907	-1.48648	0.448664	24.8941	0.258382	0.610798	mir-1(gk276) / N2	clec-56		C-type LECtin	F08H9.7	WBGene00008595
	Q95QC2	5	Q95QC2	0.133161	-0.115253	0.381574	26.9648	0.258594	0.610798	mir-1(gk276) / N2			Uncharacterized protein	R02F2.9	WBGene00019838
	Q18164	28	Q18164	-0.0967553	-0.277663	0.0841527	30.5093	0.259601	0.611685	mir-1(gk276) / N2	dpyd-1		Dihydropyrimidine dehydrogenase [NADP(+)]	C25F6.3	WBGene00016103
	P34264	5	P34264	0.317489	-0.276251	0.911228	26.6414	0.259688	0.611685	mir-1(gk276) / N2	mrpl-11		Probable 39S ribosomal protein L11, mitochondrial	B0303.15	WBGene00015133
	Q9N456	11	Q9N456	0.106308	-0.0933062	0.305923	29.6799	0.26149	0.614803	mir-1(gk276) / N2	glrx-10		GLutaRedoXin	Y34D9A.6	WBGene00021331
	Q9U2F6	4	Q9U2F6	0.199421	-0.175235	0.574076	26.5713	0.261734	0.614803	mir-1(gk276) / N2	vps-2		Related to yeast Vacuolar Protein Sorting factor	Y46G5A.12	WBGene00012903
	Q95ZN7;P46548	3;3	P46548	-0.434201	-1.25095	0.382552	25.7418	0.262286	0.615253	mir-1(gk276) / N2	nmt-1		Probable glycylpeptide N-tetradecanoyltransferase	T17E9.2	WBGene00020549
	Q93459	9	Q93459	0.136523	-0.120628	0.393674	27.5261	0.262884	0.615807	mir-1(gk276) / N2	nubp-1		Cytosolic Fe-S cluster assembly factor NUBP1 homolog	F10G8.6	WBGene00008664
	Q22067	4	Q22067	-0.44776	-1.29199	0.396472	26.7457	0.263331	0.616006	mir-1(gk276) / N2	got-1.2		Probable aspartate aminotransferase, cytoplasmic	T01C8.5	WBGene00020146
	H2KZJ5;Q6EZG4	7;6	H2KZJ5	0.142699	-0.126729	0.412126	26.3165	0.263954	0.616617	mir-1(gk276) / N2	glrx-3		GLutaRedoXin	D2063.3	WBGene00017062
	Q9N5K2	6	Q9N5K2	-0.157593	-0.456175	0.140988	28.1224	0.265501	0.61938	mir-1(gk276) / N2	rpb-5		DNA-directed RNA polymerases I, II, and III subunit RPABC1	H27M09.2	WBGene00019246
	Q86MP4;Q21024	3;3	Q21024	0.595239	-0.537917	1.7284	25.6921	0.267637	0.622716	mir-1(gk276) / N2	rnh-1.0		RNase H	F59A6.6	WBGene00004382
	Q9NES9;A5HWB2	2;2	Q9NES9	0.102141	-0.0923156	0.296598	25.7862	0.267662	0.622716	mir-1(gk276) / N2			Uncharacterized protein	Y39B6A.3	WBGene00012666
	Q8I4C1;D3NQB2	3;1	Q8I4C1	0.185547	-0.169321	0.540415	26.1989	0.269718	0.625344	mir-1(gk276) / N2			Uncharacterized protein	Y60A3A.21	WBGene00013366
	Q05036	28	Q05036	-0.154258	-0.449388	0.140871	30.9316	0.269873	0.625344	mir-1(gk276) / N2	hsp-110		Heat shock protein 110	C30C11.4	WBGene00016250
	P50432	33	P50432	-0.169949	-0.495188	0.15529	31.9667	0.269998	0.625344	mir-1(gk276) / N2	mel-32	gly-1	Serine hydroxymethyltransferase	C05D11.11	WBGene00003214
	P49196	22	P49196	0.116596	-0.106771	0.339963	34.5809	0.270464	0.625344	mir-1(gk276) / N2	rps-12		40S ribosomal protein S12	F54E7.2	WBGene00004481
	Q86S35	3	Q86S35	-0.537729	-1.56913	0.493672	26.3471	0.271011	0.625344	mir-1(gk276) / N2	col-107		COLlagen	C34H4.4	WBGene00000681
	Q22347;Q21243	5;1	Q22347	-0.777814	-2.27029	0.714666	26.4047	0.271185	0.625344	mir-1(gk276) / N2	acdh-10		Probable medium-chain specific acyl-CoA dehydrogenase 10, mitochondrial	T08G2.3	WBGene00020366
	Q56VZ2;Q9XXN4;Q9U365	6;6;5	Q9XXN4	-0.808431	-2.36027	0.743408	26.8166	0.271362	0.625344	mir-1(gk276) / N2	ngp-1		Nucleolar GTP-binding protein 2	T19A6.2	WBGene00003596
	O61219	1	O61219	-0.528266	-1.55136	0.494828	26.3242	0.275359	0.633697	mir-1(gk276) / N2	daf-31		N-alpha-acetyltransferase daf-31	K07H8.3	WBGene00000923
	Q19328	70	Q19328	-0.0878262	-0.258387	0.0827351	32.3683	0.276597	0.634836	mir-1(gk276) / N2	tsn-1		Tudor Staphylococcal Nuclease homolog	F10G7.2	WBGene00006626
	O16999	11	O16999	0.0997993	-0.0940149	0.293613	27.2767	0.276599	0.634836	mir-1(gk276) / N2			Zinc finger protein ZPR1 homolog	W03F9.1	WBGene00020999
	Q9BL27	10	Q9BL27	0.115155	-0.108691	0.339001	27.4217	0.277023	0.634953	mir-1(gk276) / N2			Uncharacterized protein	Y71H2AR.1	WBGene00022188
	Q94234	3	Q94234	-0.687932	-2.02811	0.652249	24.7762	0.278011	0.635026	mir-1(gk276) / N2	hmg-5		HMG	F45E4.9	WBGene00001975
	Q95Q18	4	Q95Q18	0.545066	-0.516983	1.60712	24.1255	0.278092	0.635026	mir-1(gk276) / N2			Beta-lactamase-like protein 2 homolog	Y53F4B.39	WBGene00013176
	Q93896	3	Q93896	0.421511	-0.400234	1.24326	24.766	0.278334	0.635026	mir-1(gk276) / N2	mct-3		MonoCarboxylate Transporter family	M03B6.2	WBGene00010834
	P48053	3	P48053	-0.535501	-1.58051	0.509506	24.6795	0.278781	0.635026	mir-1(gk276) / N2			Uncharacterized protein C05D11.1	C05D11.1	WBGene00015481
	P17330	24	P17330	-0.215672	-0.636674	0.205331	31.3812	0.278919	0.635026	mir-1(gk276) / N2	gpd-3		Glyceraldehyde-3-phosphate dehydrogenase 3	K10B3.7	WBGene00001685
	O16368	12	O16368	-0.110078	-0.32574	0.105584	28.3779	0.280563	0.637915	mir-1(gk276) / N2	rpt-2		Probable 26S proteasome regulatory subunit 4	F29G9.5	WBGene00004502
	Q20310	21	Q20310	0.0887138	-0.0855198	0.262947	30.9482	0.281675	0.639591	mir-1(gk276) / N2			Uncharacterized protein	F42A10.5	WBGene00018341
	Q22505	29	Q22505	-0.123656	-0.36674	0.119429	29.5652	0.282094	0.639688	mir-1(gk276) / N2	immt-1		MICOS complex subunit MIC60-1	T14G11.3	WBGene00020511
	Q22620;Q65ZK5	26;10	Q22620	-0.119413	-0.354354	0.115528	29.985	0.282473	0.639696	mir-1(gk276) / N2	pars-1		Prolyl Amino-acyl tRNA Synthetase	T20H4.3	WBGene00004189
	O44572	12	O44572	-0.714083	-2.12067	0.692503	26.4108	0.283005	0.640051	mir-1(gk276) / N2	tni-4		Troponin I 4	W03F8.1	WBGene00006586
	G5ED08;Q21190;Q7YZV6;Q9XWC6;Q7YZV7;H2KZ92;G8JY63;H2L024;Q8MQ74;Q22165;Q19200;Q19958;Q27433	2;2;1;1;1;1;1;1;1;1;1;1;1	Q21190	0.642517	-0.626255	1.91129	25.0258	0.284133	0.640242	mir-1(gk276) / N2	unc-1		Protein unc-1	K03E6.5	WBGene00006741
	P48152	30	P48152	-0.166937	-0.497725	0.163851	31.8795	0.285695	0.640242	mir-1(gk276) / N2	rps-3		40S ribosomal protein S3	C23G10.3	WBGene00004472
	G5EFX8;Q0PDJ7	10;2	G5EFX8	0.28688	-0.282306	0.856067	26.1188	0.286276	0.640242	mir-1(gk276) / N2	ntl-3		NOT-Like (Yeast CCR4/NOT complex component)	Y56A3A.1	WBGene00003826
	Q9XXK1;O45827	46;1	Q9XXK1	-0.0858038	-0.256137	0.0845295	34.1899	0.286526	0.640242	mir-1(gk276) / N2	atp-1		ATP synthase subunit alpha, mitochondrial	H28O16.1	WBGene00010419
	Q17473	13	Q17473	0.115322	-0.113772	0.344415	29.6844	0.286849	0.640242	mir-1(gk276) / N2	ttr-18		TransThyretin-Related family domain	B0334.1	WBGene00007142
	Q9TXI3	9	Q9TXI3	0.1128	-0.111284	0.336885	28.6003	0.286849	0.640242	mir-1(gk276) / N2	did-2		Doa4-Independent Degradation, homologous to yeast Did2	F23C8.6	WBGene00017735
	Q22716	13	Q22716	-0.131493	-0.392808	0.129822	33.1187	0.287016	0.640242	mir-1(gk276) / N2	rpl-32		Ribosomal Protein, Large subunit	T24B8.1	WBGene00004446
	O01542	18	O01542	0.104953	-0.10371	0.313615	32.4402	0.287213	0.640242	mir-1(gk276) / N2	cpn-3		CalPoNin	F28H1.2	WBGene00000779
	Q21338	7	Q21338	0.112598	-0.111316	0.336513	26.5263	0.287317	0.640242	mir-1(gk276) / N2	spt-5		Transcription elongation factor SPT5	K08E4.1	WBGene00005015
	G5ED29;D4PH96	17;17	G5ED29	0.091803	-0.0907881	0.274394	28.8888	0.287393	0.640242	mir-1(gk276) / N2	atx-2		Ataxin-2 homolog	D2045.1	WBGene00000231
	Q22352	11	Q22352	-0.517401	-1.54673	0.511929	26.6398	0.287502	0.640242	mir-1(gk276) / N2			Uncharacterized protein	T08H10.1	WBGene00020369
	Q18688	36	Q18688	-0.216976	-0.648804	0.214853	31.9275	0.287682	0.640242	mir-1(gk276) / N2	daf-21		Heat shock protein 90	C47E8.5	WBGene00000915
	Q19766	10	Q19766	0.127982	-0.127129	0.383093	30.0475	0.288392	0.640242	mir-1(gk276) / N2	tomm-20		Mitochondrial import receptor subunit TOM20 homolog	F23H12.2	WBGene00009092
	Q9NA39	18	Q9NA39	0.0927473	-0.0924606	0.277955	30.0586	0.289207	0.640242	mir-1(gk276) / N2	ccg-1		Conserved Cysteine/Glycine domain protein	Y73F8A.6	WBGene00000370
	Q22850	4	Q22850	1.10963	-1.10792	3.32719	26.3854	0.289558	0.640242	mir-1(gk276) / N2			Uncharacterized protein	T28F4.5	WBGene00012140
	O44145	2	O44145	-0.789796	-2.36822	0.788633	25.1458	0.289575	0.640242	mir-1(gk276) / N2	perm-2		PERMeable eggshell	C44B12.1	WBGene00016636
	Q9U376;Q22290	2;2	Q22290	-0.330029	-0.989659	0.329601	24.8324	0.289614	0.640242	mir-1(gk276) / N2			Uncharacterized protein	T07C4.3	WBGene00011560
	O17725	10	O17725	0.122777	-0.122749	0.368304	28.6594	0.289857	0.640242	mir-1(gk276) / N2			Uncharacterized protein	D1086.3	WBGene00008390
	P55956	2	P55956	-0.617849	-1.85463	0.618928	26.9328	0.290305	0.640401	mir-1(gk276) / N2	asp-3		Aspartic protease 3	H22K11.1	WBGene00000216
	P91240	12	P91240	-0.0873512	-0.262538	0.0878352	27.5623	0.291166	0.641469	mir-1(gk276) / N2	srpa-72		Signal recognition particle subunit SRP72	F08D12.1	WBGene00017245
	Q9N3V3	6	Q9N3V3	0.173062	-0.174845	0.520968	28.5822	0.292245	0.643014	mir-1(gk276) / N2	grl-5		GRound-Like (Grd related)	Y47D7A.5	WBGene00001714
	O45017	3	O45017	0.233963	-0.237699	0.705626	26.8353	0.293524	0.644994	mir-1(gk276) / N2			Uncharacterized protein	W01B11.6	WBGene00020917
	G5ECU1	3	G5ECU1	-0.217443	-0.659013	0.224128	25.6514	0.296849	0.64998	mir-1(gk276) / N2	skr-1		Skp1-related protein	F46A9.5	WBGene00004807
	Q9BKU3	9	Q9BKU3	-0.131021	-0.39735	0.135308	28.4135	0.297291	0.64998	mir-1(gk276) / N2	eif-2alpha		Eukaryotic Initiation Factor	Y37E3.10	WBGene00021351
	Q7Z145;Q23487	23;22	Q7Z145	0.0929152	-0.0960351	0.281865	29.9302	0.297485	0.64998	mir-1(gk276) / N2	fubl-2	fubp-3.2	FUBp (FUBP) Like	ZK418.9	WBGene00022738
	G4S034;Q21408	97;95	G4S034	0.0712828	-0.0737081	0.216274	31.5163	0.297585	0.64998	mir-1(gk276) / N2	spc-1		SPeCtrin	K10B3.10	WBGene00004951
	I7J4C9;I7LHV9;Q23587;I7LFE6;I7K4J2;I7LHV8;I7KSC8;I7J4C8;I6Z0I7;I7K4J6	13;13;13;13;13;13;13;13;13;8	Q23587	0.142936	-0.147873	0.433746	27.1312	0.297701	0.64998	mir-1(gk276) / N2	fbn-1		FiBrilliN homolog	ZK783.1	WBGene00022816
	Q86LS4	9	Q86LS4	0.135503	-0.141222	0.412229	30.3332	0.299416	0.652888	mir-1(gk276) / N2	dao-2		Dauer or Aging adult Overexpression	M03A1.7	WBGene00000928
	O62388;P49622	20;14	O62388	0.18315	-0.192018	0.558318	33.75	0.300802	0.655071	mir-1(gk276) / N2			Ribosomal protein L37	W01D2.1	WBGene00012179
	P91353	8	P91353	0.112262	-0.118257	0.342781	27.7193	0.301909	0.655701	mir-1(gk276) / N2	mrpl-24		Probable 39S ribosomal protein L24, mitochondrial	F59A3.3	WBGene00019076
	G5EFM7	4	G5EFM7	0.209594	-0.22107	0.640258	25.4117	0.302211	0.655701	mir-1(gk276) / N2			Uncharacterized protein	F18C12.3	WBGene00008934
	Q11067;Q9XTU8	25;2	Q11067	0.0905212	-0.0955905	0.276633	31.5174	0.302488	0.655701	mir-1(gk276) / N2	pdi-6	tag-320	Protein disulfide-isomerase A6 homolog	B0403.4	WBGene00015168
	Q9NA78	6	Q9NA78	-0.231384	-0.707259	0.244491	28.72	0.302631	0.655701	mir-1(gk276) / N2	txdc-12.1		ThioredoXin Domain Containing protein homolog	Y57A10A.23	WBGene00013263
	P34383	7	P34383	-0.279759	-0.857287	0.297768	28.0209	0.304344	0.658496	mir-1(gk276) / N2	far-2		Fatty-acid and retinol-binding protein 2	F02A9.3	WBGene00001386
	Q9GRZ9	36	Q9GRZ9	0.0815671	-0.0869468	0.250081	30.8661	0.304695	0.658496	mir-1(gk276) / N2	tcc-1		Transmembrane and Coiled-Coil protein	Y59A8A.3	WBGene00013340
	G5EDP2	20	G5EDP2	-0.0998753	-0.306516	0.106765	30.0947	0.305365	0.659107	mir-1(gk276) / N2	daf-22		Non-specific lipid-transfer protein-like 2	Y57A10C.6	WBGene00013284
	Q23121	11	Q23121	0.105605	-0.113459	0.324669	30.0114	0.306552	0.660192	mir-1(gk276) / N2	rsp-1	srp-5	Probable splicing factor, arginine/serine-rich 1	W02B12.3	WBGene00004698
	Q95YF3	6	Q95YF3	-0.173051	-0.532144	0.186041	27.053	0.306705	0.660192	mir-1(gk276) / N2	cgh-1		ATP-dependent RNA helicase cgh-1	C07H6.5	WBGene00000479
	Q9N384	7	Q9N384	-0.249698	-0.768522	0.269126	28.4552	0.30731	0.660192	mir-1(gk276) / N2	lec-6		Galectin	Y55B1AR.1	WBGene00002269
	Q20684	21	Q20684	-0.109924	-0.338379	0.118531	29.8277	0.307418	0.660192	mir-1(gk276) / N2	lec-2		GaLECtin	F52H3.7	WBGene00002265
	M1Z854;Q19286	29;29	Q19286	-0.134274	-0.413629	0.145081	30.6027	0.307899	0.660393	mir-1(gk276) / N2	ifb-2		Intermediate filament protein ifb-2	F10C1.7	WBGene00002054
	Q69Z12	3	Q69Z12	-0.543389	-1.67597	0.589196	25.2083	0.308738	0.660635	mir-1(gk276) / N2	mlc-7		Myosin Light Chain	K08E3.10	WBGene00023451
	Q9BL43	6	Q9BL43	-0.542016	-1.67186	0.587831	26.3097	0.308788	0.660635	mir-1(gk276) / N2			Uncharacterized protein	Y71H2AM.13	WBGene00022178
	Q9U1Q2;Q7K707	4;3	Q9U1Q2	-0.28823	-0.890586	0.314126	24.8147	0.309954	0.661906	mir-1(gk276) / N2	gpi-1		Glucose-6-phosphate isomerase	Y87G2A.8	WBGene00013597
	Q22508	5	Q22508	-0.0801379	-0.247689	0.0874131	28.912	0.310159	0.661906	mir-1(gk276) / N2	tag-18		Uncharacterized protein	T14G12.3	WBGene00006408
	G5EEE5	2	G5EEE5	-0.674354	-2.0867	0.737989	26.8701	0.310943	0.66215	mir-1(gk276) / N2	elo-1	ceelo1	Elongation of very long chain fatty acids protein	F56H11.4	WBGene00001239
	Q9U3I0	4	Q9U3I0	-0.120886	-0.374214	0.132442	27.561	0.311211	0.66215	mir-1(gk276) / N2	rpb-12		RNA Polymerase II (B) subunit	F23B2.13	WBGene00009078
	H2L056	6	H2L056	0.531282	-0.583596	1.64616	25.5478	0.311839	0.66215	mir-1(gk276) / N2	ubxn-3		UBX domain-containing protein 3	F48A11.5	WBGene00018586
	O62198;O45901	5;3	O62198	-0.709518	-2.19893	0.779896	27.2559	0.311997	0.66215	mir-1(gk276) / N2			Uncharacterized protein	F32A11.1	WBGene00009307
	Q9XTU6	2	Q9XTU6	0.172645	-0.189944	0.535234	27.9574	0.312217	0.66215	mir-1(gk276) / N2	snr-6		Probable small nuclear ribonucleoprotein E	Y49E10.15	WBGene00004919
	Q9N4K0	6	Q9N4K0	0.150314	-0.165702	0.466331	28.0292	0.312691	0.662329	mir-1(gk276) / N2			MICOS complex subunit Mic10	F54A3.5	WBGene00018784
	Q21549	2	Q21549	-0.660192	-2.05182	0.731432	24.3576	0.313896	0.664055	mir-1(gk276) / N2	gss-1		Glutathione synthetase	M176.2	WBGene00010941
	O45418	18	O45418	0.087414	-0.097373	0.272201	29.5735	0.315203	0.665317	mir-1(gk276) / N2	fkb-6		Peptidylprolyl isomerase	F31D4.3	WBGene00001431
	Q18211	9	Q18211	0.0833346	-0.0930007	0.25967	28.8345	0.31565	0.665317	mir-1(gk276) / N2	ran-3		Regulator of chromosome condensation	C26D10.1	WBGene00004304
	O44904	2	O44904	-0.677821	-2.11213	0.756485	25.3495	0.315664	0.665317	mir-1(gk276) / N2	col-88		COLlagen	W05G11.3	WBGene00000663
	Q21551	16	Q21551	0.0916011	-0.102478	0.28568	30.5028	0.316245	0.665717	mir-1(gk276) / N2	chch-3		MICOS complex subunit MIC19	M176.3	WBGene00010942
	Q7Z072;Q7Z071	36;29	Q7Z072	0.100689	-0.11305	0.314428	32.4905	0.317116	0.666726	mir-1(gk276) / N2	tnt-2		TropoNin T	F53A9.10	WBGene00006587
	P55954	13	P55954	-0.109884	-0.344138	0.124371	31.0178	0.319072	0.66809	mir-1(gk276) / N2	cox-5A	cco-2	Cytochrome c oxidase subunit 5A, mitochondrial	Y37D8A.14	WBGene00012553
	Q95PZ7	13	Q95PZ7	-0.220176	-0.689777	0.249426	28.1737	0.31929	0.66809	mir-1(gk276) / N2			Uncharacterized protein	Y66D12A.9	WBGene00013435
	P34476	3	P34476	0.16384	-0.185799	0.513479	26.1347	0.319544	0.66809	mir-1(gk276) / N2	rpac-19		Probable DNA-directed RNA polymerases I and III subunit RPAC2	F58A4.9	WBGene00010230
	G5EF90;Q7YTL2;Q56VY2;Q9U3L6;O62468	3;1;1;1;1	G5EF90	0.630316	-0.716486	1.97712	25.2701	0.320119	0.66809	mir-1(gk276) / N2			Uncharacterized protein	K01D12.15_K01D12.7	WBGene00010474_WBGene00010466
	O45946	32	O45946	-0.105014	-0.329574	0.119546	33.9608	0.32048	0.66809	mir-1(gk276) / N2	rpl-18		60S ribosomal protein L18	Y45F10D.12	WBGene00004430
	Q17335	4	Q17335	-0.227743	-0.714812	0.259327	25.792	0.320543	0.66809	mir-1(gk276) / N2			Alcohol dehydrogenase class-3	H24K24.3	WBGene00019240
	P46563;G8JY45	33;24	P46563	-0.15851	-0.498189	0.18117	32.507	0.32146	0.66809	mir-1(gk276) / N2	aldo-2		Fructose-bisphosphate aldolase 2	F01F1.12	WBGene00017166
	Q22705	5	Q22705	-0.298706	-0.938865	0.341454	25.7894	0.321493	0.66809	mir-1(gk276) / N2			Uncharacterized protein	T23G7.3	WBGene00011966
	P91427	26	P91427	-0.132736	-0.417332	0.15186	31.0419	0.321699	0.66809	mir-1(gk276) / N2	pgk-1		Probable phosphoglycerate kinase	T03F1.3	WBGene00020185
	P27639;Q20935	19;2	P27639	-0.122295	-0.384541	0.139951	31.2859	0.321765	0.66809	mir-1(gk276) / N2	inf-1		Eukaryotic initiation factor 4A	F57B9.6	WBGene00002083
	Q20507	7	Q20507	-0.410648	-1.292	0.470703	27.6471	0.322163	0.66809	mir-1(gk276) / N2	acbp-3		Acyl-CoA-binding protein homolog 3	F47B10.7	WBGene00009818
	A0A1N7SYQ6;Q18265	6;6	Q18265	0.16573	-0.190509	0.521968	28.2602	0.322863	0.66809	mir-1(gk276) / N2	fust-1		FUS/TLS RNA binding protein homolog	C27H5.3	WBGene00016173
	P91457	18	P91457	0.102312	-0.117661	0.322286	28.2114	0.322971	0.66809	mir-1(gk276) / N2	npp-7		Nuclear Pore complex Protein	T19B4.2	WBGene00003793
	O17071	13	O17071	-0.168583	-0.531265	0.194099	27.3741	0.323257	0.66809	mir-1(gk276) / N2	rpt-4		Probable 26S proteasome regulatory subunit 10B	F23F1.8	WBGene00004504
	Q23163	9	Q23163	0.16076	-0.185533	0.507053	27.3291	0.32384	0.668485	mir-1(gk276) / N2	lpr-5		LiPocalin-Related protein	W04G3.2	WBGene00012256
	G5EEL2;G5ECP2	5;4	G5EEL2	-0.183963	-0.580608	0.212683	26.0684	0.324271	0.668564	mir-1(gk276) / N2	plrg-1		PLeiotropic ReGulator (Vertebrate) homolog	D1054.15	WBGene00006481
	P34346	26	P34346	0.0927582	-0.107868	0.293385	32.0755	0.325713	0.670724	mir-1(gk276) / N2	let-754		Adenylate kinase	C29E4.8	WBGene00002879
	Q07749	15	Q07749	-0.114285	-0.362338	0.133768	29.1371	0.327321	0.673222	mir-1(gk276) / N2	unc-60		Actin-depolymerizing factor 2, isoform c	C38C3.5	WBGene00006794
	Q22619	6	Q22619	0.138784	-0.163104	0.440672	29.158	0.328326	0.674474	mir-1(gk276) / N2			Probable NADH dehydrogenase [ubiquinone] iron-sulfur protein 8, mitochondrial	T20H4.5	WBGene00020636
	P52554	17	P52554	0.0693841	-0.0818616	0.22063	29.2163	0.329296	0.675653	mir-1(gk276) / N2	pfd-6		Probable prefoldin subunit 6	F21C3.5	WBGene00009004
	O17570	11	O17570	-0.132094	-0.420667	0.15648	31.9778	0.330303	0.676902	mir-1(gk276) / N2	rpl-38		60S ribosomal protein L38	C06B8.8	WBGene00004452
	Q9XTZ3	2	Q9XTZ3	0.315317	-0.374856	1.00549	24.3692	0.331188	0.6779	mir-1(gk276) / N2			Uncharacterized protein	C18D11.3	WBGene00007681
	A0A1N7SYN7;A0A1N7SYP3;A0A1N7SYR7;A0A1N7SYN9;G5EFM4;G5EDD3;G5ECG5;G5EFD1;A0A1N7SYN2;A0A1N7SYQ0	28;28;27;27;27;27;26;15;13;13	A0A1N7SYN7	0.153068	-0.183321	0.489456	27.1863	0.333038	0.680868	mir-1(gk276) / N2	vab-10		Uncharacterized protein	ZK1151.1	WBGene00006876
	Q9XVG3;Q9U349;Q9U348;Q9XUE9	3;3;3;2	Q9XVG3	-0.219385	-0.702144	0.263374	26.8995	0.333637	0.681275	mir-1(gk276) / N2	col-92		COLlagen	W05B2.6	WBGene00000667
	G5EFI4	10	G5EFI4	-0.242513	-0.777946	0.292919	28.7675	0.335167	0.683466	mir-1(gk276) / N2	lec-5		Galectin	ZK1248.16	WBGene00002268
	Q9N3F7	11	Q9N3F7	0.187286	-0.226524	0.601095	28.8806	0.335513	0.683466	mir-1(gk276) / N2			Uncharacterized protein	Y53G8AR.9	WBGene00021816
	P54889	19	P54889	-0.146171	-0.470472	0.17813	28.4529	0.337409	0.685276	mir-1(gk276) / N2	alh-13		Probable delta-1-pyrroline-5-carboxylate synthase	T22H6.2	WBGene00011938
	Q18685	8	Q18685	0.110472	-0.134738	0.355683	27.2801	0.337619	0.685276	mir-1(gk276) / N2	unc-112		Protein unc-112	C47E8.7	WBGene00006836
	Q18037	4	Q18037	-0.104922	-0.338072	0.128227	26.5457	0.338128	0.685276	mir-1(gk276) / N2			Uncharacterized protein	C16A3.4	WBGene00015809
	O62431;D3YT95	12;2	O62431	-0.226027	-0.7286	0.276547	27.3587	0.338418	0.685276	mir-1(gk276) / N2	qars-1	ers-1 qrs-5	Probable glutamine--tRNA ligase	Y41E3.4	WBGene00001336
	Q18035	3	Q18035	0.171999	-0.210958	0.554956	25.5176	0.339037	0.685276	mir-1(gk276) / N2			Protein MAK16 homolog	C16A3.6	WBGene00015811
	Q18020;E0AHB8	2;1	Q18020	0.145053	-0.178017	0.468123	26.2988	0.33919	0.685276	mir-1(gk276) / N2	hrg-7		Heme Responsive protein	C15C8.3	WBGene00007605
	Q18599	20	Q18599	-0.0787337	-0.254149	0.096682	29.9494	0.339337	0.685276	mir-1(gk276) / N2	acer-1		ACEtyl-CoA Regulator	C44B7.10	WBGene00016630
	G5EG85;S6FN00;Q9U9J8;E0AHA7	34;34;34;34	Q9U9J8	-0.128143	-0.413816	0.15753	29.4184	0.33962	0.685276	mir-1(gk276) / N2	unc-70	bgs-1	Spectrin beta chain	K11C4.3	WBGene00006803
	Q21294	2	Q21294	0.77503	-0.957979	2.50804	25.1673	0.341004	0.687254	mir-1(gk276) / N2	ssq-1		Sperm-Specific family, class Q	K07F5.11	WBGene00006050
	Q966I7;Q8MXU9	28;3	Q966I7	0.237166	-0.293996	0.768329	33.3338	0.341736	0.687292	mir-1(gk276) / N2			Uncharacterized protein	K08D12.3	WBGene00019537
	Q8WQA8	25	Q8WQA8	0.0865069	-0.107275	0.280289	34.9315	0.34183	0.687292	mir-1(gk276) / N2	rps-20		Ribosomal Protein, Small subunit	Y105E8A.16	WBGene00004489
	Q9BIB7;H2KZN0	8;6	Q9BIB7	0.159057	-0.1982	0.516313	26.8817	0.343065	0.688035	mir-1(gk276) / N2	hrpf-1		HnRNP F homolog	W02D3.11	WBGene00020936
	Q9XXF2;Q21293;O44902;Q9N472;Q19799;G5EG23;G5EES8	2;2;2;2;2;2;2	Q19799	0.595697	-0.742534	1.93393	25.8301	0.343146	0.688035	mir-1(gk276) / N2	nspd-9		Nematode Specific Peptide family, group D	F26A1.10	WBGene00017808
	O44566	5	O44566	-0.543663	-1.76576	0.678432	25.9954	0.343432	0.688035	mir-1(gk276) / N2			Uncharacterized protein	W03F8.4	WBGene00020994
	Q9GUM1;Q2AAB8	7;4	Q9GUM1	-0.66521	-2.16281	0.832394	27.7154	0.344134	0.688035	mir-1(gk276) / N2			Uncharacterized protein	Y73E7A.1	WBGene00022268
	Q95ZY7;A0A1C3NSL9;H2KYC5	16;16;11	A0A1C3NSL9	0.100136	-0.125344	0.325616	27.9045	0.344219	0.688035	mir-1(gk276) / N2	ajm-1		Apical junction molecule	C25A11.4	WBGene00000100
	Q9N2W7	10	Q9N2W7	0.107325	-0.134649	0.349298	29.2604	0.344802	0.68839	mir-1(gk276) / N2			Probable NADH dehydrogenase [ubiquinone] 1 alpha subcomplex subunit 12	Y94H6A.8	WBGene00022380
	G5EFF7	11	G5EFF7	0.123022	-0.155023	0.401067	28.8086	0.345927	0.689696	mir-1(gk276) / N2	ubql-1		Ubiquilin	F15C11.2	WBGene00008852
	Q9N358;U4PBK9	31;25	Q9N358	-0.090118	-0.293945	0.113709	30.3295	0.346265	0.689696	mir-1(gk276) / N2	cct-8		T-complex protein 1 subunit theta	Y55F3AR.3	WBGene00021934
	G5EE42	7	G5EE42	0.202924	-0.257539	0.663387	26.832	0.347759	0.691862	mir-1(gk276) / N2			Uncharacterized protein	ZK1098.11	WBGene00014226
	Q9XTV4	15	Q9XTV4	0.0947548	-0.120748	0.310257	30.4809	0.348806	0.69266	mir-1(gk276) / N2	mbf-1		MBF (Multiprotein bridging factor) transcriptional coactivator	H21P03.1	WBGene00003148
	Q9XW16	8	Q9XW16	-0.0928046	-0.303949	0.118339	28.5935	0.348974	0.69266	mir-1(gk276) / N2	pfn-1		Profilin-1	Y18D10A.20	WBGene00003989
	Q20950	9	Q20950	-0.155365	-0.510175	0.199446	27.0509	0.350705	0.694633	mir-1(gk276) / N2			Uncharacterized protein	F57F5.1	WBGene00010204
	Q93716	2	Q93716	-0.41701	-1.37117	0.537154	24.6022	0.351585	0.694633	mir-1(gk276) / N2	cfim-1		Cleavage Factor IM (CFIm) homolog	F43G9.5	WBGene00009668
	P91283;Q7JNG1	25;25	P91283	0.0974848	-0.125612	0.320582	32.5424	0.35167	0.694633	mir-1(gk276) / N2	atp-3		ATP synthase subunit	F27C1.7	WBGene00000230
	Q18115	5	Q18115	0.076688	-0.098854	0.25223	28.0399	0.351773	0.694633	mir-1(gk276) / N2	rpn-2		26S proteasome non-ATPase regulatory subunit 1	C23G10.4	WBGene00004459
	P91914	20	P91914	-0.132964	-0.437479	0.171551	33.0072	0.352007	0.694633	mir-1(gk276) / N2	rpl-27		60S ribosomal protein L27	C53H9.1	WBGene00004441
	O44189;W6RRY4;H2KYK9	14;14;10	O44189	-0.130692	-0.430821	0.169437	29.0588	0.353259	0.696297	mir-1(gk276) / N2			Uncharacterized protein	F33D4.6	WBGene00017998
	Q9U3Q0	5	Q9U3Q0	-0.249097	-0.821958	0.323763	25.3293	0.353917	0.696787	mir-1(gk276) / N2	mrps-22		Mitochondrial Ribosomal Protein, Small	C14A4.14	WBGene00007564
	Q18158	2	Q18158	0.136395	-0.178031	0.450821	26.0394	0.355019	0.697768	mir-1(gk276) / N2	swm-1		Sperm activation Without Mating	C25E10.9	WBGene00023417
	Q5WRM0;Q9XUT9	5;5	Q9XUT9	-0.710669	-2.3498	0.928466	26.6645	0.355259	0.697768	mir-1(gk276) / N2			Uncharacterized protein	K06G5.1	WBGene00010605
	Q8MPX7	2	Q8MPX7	-0.479379	-1.58693	0.628176	24.6498	0.35604	0.697768	mir-1(gk276) / N2	spp-2		SaPosin-like Protein family	T08A9.12	WBGene00004987
	Q23571	16	Q23571	0.0723358	-0.0949283	0.2396	29.4941	0.356424	0.697768	mir-1(gk276) / N2	dbt-1		Lipoamide acyltransferase component of branched-chain alpha-keto acid dehydrogenase complex, mitochondrial	ZK669.4	WBGene00014054
	Q21265	5	Q21265	0.0888668	-0.117058	0.294791	27.6781	0.357397	0.697768	mir-1(gk276) / N2	tag-225		Putative metalloproteinase inhibitor tag-225	K07C11.5	WBGene00019478
	O01868	26	O01868	0.098785	-0.130374	0.327944	34.1118	0.357901	0.697768	mir-1(gk276) / N2	rpl-24.1		60S ribosomal protein L24	D1007.12	WBGene00004436
	Q20168	7	Q20168	-0.0829952	-0.275718	0.109728	28.134	0.358362	0.697768	mir-1(gk276) / N2	copb-2		Probable coatomer subunit beta'	F38E11.5	WBGene00009542
	Q19969	5	Q19969	-0.0955591	-0.317773	0.126655	28.1327	0.359016	0.697768	mir-1(gk276) / N2	ima-3		Importin subunit alpha-3	F32E10.4	WBGene00002074
	Q17574	16	Q17574	-0.12926	-0.429918	0.171397	28.2464	0.35913	0.697768	mir-1(gk276) / N2	mtrr-1	tag-165	Methionine synthase reductase	C01G6.6	WBGene00006510
	G5ECY0	16	G5ECY0	0.082032	-0.108914	0.272978	28.4572	0.359469	0.697768	mir-1(gk276) / N2	dlg-1		Disks large homolog 1	C25F6.2	WBGene00001006
	Q9NEU5	17	Q9NEU5	0.120521	-0.160173	0.401215	29.334	0.359727	0.697768	mir-1(gk276) / N2			Ribosome biogenesis protein NOP53	Y39B6A.33	WBGene00012692
	Q9XWN4	3	Q9XWN4	-0.432674	-1.4404	0.57505	26.5185	0.359737	0.697768	mir-1(gk276) / N2	nlp-26		Neuropeptide-Like Protein	Y43F8C.2	WBGene00003764
	Q9XVP0	15	Q9XVP0	-0.102111	-0.339935	0.135714	33.0897	0.359742	0.697768	mir-1(gk276) / N2	rps-15		40S ribosomal protein S15	F36A2.6	WBGene00004484
	Q09486	7	Q09486	-0.116197	-0.38737	0.154975	27.4897	0.360655	0.698021	mir-1(gk276) / N2			Uncharacterized protein	C30G12.2	WBGene00016274
	Q94129	2	Q94129	0.268819	-0.358582	0.896221	24.9693	0.360692	0.698021	mir-1(gk276) / N2	wrt-4		Warthog protein 4	ZK678.5	WBGene00006950
	A3QM98;O17642;O17641;P91249	6;1;1;1	A3QM98	-0.113999	-0.380422	0.152424	29.4504	0.361314	0.698272	mir-1(gk276) / N2	col-138		COLlagen	C52D10.13	WBGene00000711
	Q95Q11	8	Q95Q11	0.170134	-0.227766	0.568034	27.8215	0.361642	0.698272	mir-1(gk276) / N2	mrps-7		28S ribosomal protein S7, mitochondrial	Y57G11C.34	WBGene00013324
	Q9XXQ6;F3Y5P3	6;5	Q9XXQ6	-0.724446	-2.42103	0.972136	26.5856	0.362261	0.698676	mir-1(gk276) / N2	ttr-25		TransThyretin-Related family domain	Y51A2D.10	WBGene00013078
	Q18885	13	Q18885	-0.126854	-0.425097	0.171389	32.5817	0.364056	0.700673	mir-1(gk276) / N2	icd-1		Transcription factor BTF3 homolog	C56C10.8	WBGene00002045
	O62053	3	O62053	-0.770121	-2.58099	1.04074	27.6809	0.36412	0.700673	mir-1(gk276) / N2	ule-4		UPF0375 protein ule-4	C08F11.11	WBGene00007458
	Q9GZH5	8	Q9GZH5	-0.126228	-0.423819	0.171362	28.7335	0.365319	0.701563	mir-1(gk276) / N2	rpn-1		26S proteasome non-ATPase regulatory subunit 2	T22D1.9	WBGene00004458
	O02220	3	O02220	-0.247825	-0.832198	0.336548	25.9973	0.365406	0.701563	mir-1(gk276) / N2	mrpl-34		Mitochondrial Ribosomal Protein, Large	C25A1.13	WBGene00007712
	P91318	3	P91318	0.169065	-0.230688	0.568819	25.7824	0.366665	0.701785	mir-1(gk276) / N2			RRP15-like protein	F53E10.6	WBGene00018762
	Q9XWZ2	3	Q9XWZ2	-0.810904	-2.72843	1.10662	27.4228	0.366703	0.701785	mir-1(gk276) / N2	acdh-11		Acyl-CoA dehydrogenase family member 11	Y45F3A.3	WBGene00012860
	P49041	19	P49041	-0.0877074	-0.295132	0.119718	33.0909	0.366758	0.701785	mir-1(gk276) / N2	rps-5		40S ribosomal protein S5	T05E11.1	WBGene00004474
	P10771	11	P10771	0.104947	-0.143528	0.353423	30.1286	0.367274	0.701983	mir-1(gk276) / N2	his-24		Histone H1.1	M163.3	WBGene00001898
	C6KRN1	3	C6KRN1	0.1403	-0.192923	0.473523	27.7951	0.368713	0.703173	mir-1(gk276) / N2	sao-1		Suppressor of aph-1	R10D12.14	WBGene00011195
	P48166	18	P48166	0.161848	-0.222559	0.546255	34.275	0.368722	0.703173	mir-1(gk276) / N2	rpl-36.A	rpl-41	Ribosomal protein rpl-36.A	C09H10.2	WBGene00004454
	Q19724	8	Q19724	0.0902019	-0.124635	0.305039	29.5921	0.369998	0.704214	mir-1(gk276) / N2	nduf-6		Probable NADH dehydrogenase [ubiquinone] iron-sulfur protein 6, mitochondrial	F22D6.4	WBGene00009051
	Q93576	17	Q93576	-0.133061	-0.450045	0.183922	32.3795	0.370095	0.704214	mir-1(gk276) / N2	ndk-1		Nucleoside diphosphate kinase	F25H2.5	WBGene00009119
	P51404	28	P51404	-0.171452	-0.580679	0.237775	33.5854	0.370979	0.705108	mir-1(gk276) / N2	rps-13		40S ribosomal protein S13	C16A3.9	WBGene00004482
	Q19663	18	Q19663	-0.0783113	-0.265436	0.108813	27.5935	0.371489	0.705291	mir-1(gk276) / N2			Uncharacterized protein	F21C10.7	WBGene00017657
	P91128	42	P91128	0.0730729	-0.101847	0.247993	35.129	0.372309	0.705434	mir-1(gk276) / N2	rpl-13		60S ribosomal protein L13	C32E8.2	WBGene00004425
	P90897	5	P90897	-0.46927	-1.59281	0.654265	25.7423	0.372393	0.705434	mir-1(gk276) / N2	rde-12		DEAD-box ATP-dependent RNA helicase rde-12	F58G11.2	WBGene00010280
	Q23164	4	Q23164	-0.395284	-1.34363	0.553061	26.3298	0.373335	0.70614	mir-1(gk276) / N2	lpr-4		LiPocalin-Related protein	W04G3.3	WBGene00012257
	G5ECU3;P40614	5;5	P40614	-0.777257	-2.64699	1.09248	27.4108	0.374557	0.70614	mir-1(gk276) / N2			Phosphate carrier protein, mitochondrial	F01G4.6	WBGene00008505
	Q22369	2	Q22369	-0.460865	-1.5698	0.648073	26.0546	0.374681	0.70614	mir-1(gk276) / N2	col-41		COLlagen	T10B10.1	WBGene00000618
	P37165	14	P37165	0.0964901	-0.135712	0.328693	33.2009	0.374735	0.70614	mir-1(gk276) / N2	ubl-1		Ubiquitin-like protein 1-40S ribosomal protein S27a	H06I04.4	WBGene00006725
	P55853	9	P55853	0.106057	-0.149226	0.361339	29.3814	0.374839	0.70614	mir-1(gk276) / N2	smo-1	smt3 sumo	Small ubiquitin-related modifier	K12C11.2	WBGene00004888
	A0A1T5HUZ1;Q06561;G5EEI5;H9G349;H9G351;H9G350;H9G354;H9G353;U4PS79	108;105;104;103;101;101;97;94;7	A0A1T5HUZ1	0.072823	-0.102784	0.248429	33.1221	0.375671	0.706925	mir-1(gk276) / N2	unc-52		Uncharacterized protein	ZC101.2	WBGene00006787
	Q9XU67;A0A061AJ27	8;3	Q9XU67	0.121077	-0.171162	0.413317	26.6697	0.376096	0.706944	mir-1(gk276) / N2	rbd-1		RBD (RNA binding domain) protein	T23F6.4	WBGene00004315
	P34697;Q27538	14;2	P34697	0.0741205	-0.105226	0.253467	31.2946	0.377233	0.707643	mir-1(gk276) / N2	sod-1		Superoxide dismutase [Cu-Zn]	C15F1.7	WBGene00004930
	A0A0K3AUC2	63	A0A0K3AUC2	-0.0995885	-0.340706	0.141529	28.4209	0.377511	0.707643	mir-1(gk276) / N2	lev-11		Uncharacterized protein	Y105E8B.1	WBGene00002978
	O16465	1	O16465	0.203499	-0.290249	0.697246	24.1348	0.378484	0.707643	mir-1(gk276) / N2			Uncharacterized protein	F41E6.12	WBGene00018293
	O01692	24	O01692	0.138377	-0.197407	0.474162	33.9443	0.378539	0.707643	mir-1(gk276) / N2	rps-17		40S ribosomal protein S17	T08B2.10	WBGene00004486
	Q9TYS3	11	Q9TYS3	-0.106978	-0.366643	0.152688	29.2835	0.378672	0.707643	mir-1(gk276) / N2	ftn-2		Ferritin	D1037.3	WBGene00001501
	O01541	22	O01541	-0.0983483	-0.337219	0.140522	29.0108	0.378961	0.707643	mir-1(gk276) / N2	aars-2	ars-2	Alanine--tRNA ligase, cytoplasmic	F28H1.3	WBGene00000197
	G8JYE5;Q23525	6;6	Q23525	-0.508922	-1.74674	0.728894	26.1452	0.379602	0.707662	mir-1(gk276) / N2			Uncharacterized protein ZK546.14	ZK546.14	WBGene00022765
	Q95Y67	4	Q95Y67	0.154865	-0.221968	0.531698	25.2757	0.379802	0.707662	mir-1(gk276) / N2	pes-4		Patterned Expression Site	Y119D3B.17	WBGene00003978
	P17140	10	P17140	-0.101468	-0.348871	0.145934	29.7461	0.380727	0.70771	mir-1(gk276) / N2	let-2	clb-1	Collagen alpha-2(IV) chain	F01G12.5	WBGene00002280
	Q21465	11	Q21465	-0.147323	-0.506793	0.212148	30.301	0.381064	0.70771	mir-1(gk276) / N2	zig-12		2 (Zwei) IG domain protein	M02D8.1	WBGene00019727
	G5EGL2;G2HK05	5;1	G5EGL2	-0.103383	-0.355845	0.14908	26.7554	0.381438	0.70771	mir-1(gk276) / N2			Uncharacterized protein	T28D6.6	WBGene00012126
	G5EE41	7	G5EE41	-0.19067	-0.656713	0.275374	29.3462	0.381854	0.70771	mir-1(gk276) / N2	cuc-1	CUC-1	CU (Copper) Chaperonin	ZK652.11	WBGene00000835
	Q20898	11	Q20898	0.151092	-0.218719	0.520903	28.2677	0.382478	0.70771	mir-1(gk276) / N2	ifet-1	spn-2	Translational repressor ifet-1	F56F3.1	WBGene00004132
	Q5FC40;B1Q273	8;8	Q5FC40	-0.209229	-0.721865	0.303408	28.6458	0.382951	0.70771	mir-1(gk276) / N2			Uncharacterized protein	D1086.10	WBGene00044080
	Q65ZK0;Q19825;A5HU89	10;10;4	Q19825	-0.288444	-0.995224	0.418336	27.3646	0.382988	0.70771	mir-1(gk276) / N2	rars-1	rrt-1	Probable arginine--tRNA ligase, cytoplasmic	F26F4.10	WBGene00004679
	Q09603	11	Q09603	0.0869601	-0.126719	0.300639	27.651	0.38427	0.70771	mir-1(gk276) / N2	ech-4		Enoyl-CoA Hydratase	R06F6.9	WBGene00001153
	Q19240;Q95QM5	8;8	Q19240	0.0881746	-0.12883	0.305179	27.55	0.384988	0.70771	mir-1(gk276) / N2	unc-115		Uncharacterized protein	F09B9.2	WBGene00006839
	Q17633	2	Q17633	-0.690541	-2.39029	1.00921	25.5747	0.385061	0.70771	mir-1(gk276) / N2			Uncharacterized protein	C04G2.9	WBGene00007308
	Q17770;G8JY07;A3RMS2	63;52;45	Q17770	-0.122057	-0.422674	0.178561	34.1255	0.385332	0.70771	mir-1(gk276) / N2	pdi-2		Protein disulfide-isomerase 2	C07A12.4	WBGene00003963
	Q18709	8	Q18709	0.156804	-0.229471	0.543079	29.3591	0.385423	0.70771	mir-1(gk276) / N2			Uncharacterized protein	C49F8.3	WBGene00008215
	Q8MXH7	11	Q8MXH7	0.0715192	-0.104672	0.24771	28.1524	0.385445	0.70771	mir-1(gk276) / N2			Uncharacterized protein	C11D2.7	WBGene00015703
	Q9XTT4	5	Q9XTT4	0.167698	-0.245615	0.581011	25.555	0.385646	0.70771	mir-1(gk276) / N2	ani-1		Anillin-like protein 1	Y49E10.19	WBGene00013038
	O18180	10	O18180	0.123562	-0.181805	0.428929	28.9269	0.386891	0.709231	mir-1(gk276) / N2	mrpl-12		Mitochondrial Ribosomal Protein, Large	W09D10.3	WBGene00012361
	O17892	4	O17892	0.145646	-0.215251	0.506543	26.453	0.388096	0.709711	mir-1(gk276) / N2	xdh-1	xhd-1	Xanthine DeHydrogenase homolog	F55B11.1	WBGene00010083
	Q9UAV8;Q5TKA3;Q5TKA4	4;3;3	Q9UAV8	0.478381	-0.707079	1.66384	25.3323	0.388125	0.709711	mir-1(gk276) / N2	acs-1		Fatty Acid CoA Synthetase family	F46E10.1	WBGene00018488
	Q69ZI6	4	Q69ZI6	-0.20883	-0.726641	0.30898	27.1001	0.388403	0.709711	mir-1(gk276) / N2			Uncharacterized protein	T12D8.10	WBGene00023450
	Q9XW38	3	Q9XW38	-0.477091	-1.6651	0.710919	24.1071	0.390335	0.71226	mir-1(gk276) / N2			Uncharacterized protein	Y69E1A.2	WBGene00013474
	Q19257	2	Q19257	0.317228	-0.473583	1.10804	23.8941	0.390841	0.71226	mir-1(gk276) / N2			Uncharacterized protein	F09E5.7	WBGene00017285
	Q18550	3	Q18550	-0.237038	-0.829514	0.355438	25.6057	0.392048	0.71226	mir-1(gk276) / N2			Uncharacterized protein	C39H7.4	WBGene00016542
	Q18905;A0A0K3AW00;A0A0K3ASE6	6;2;2	Q18905	0.380706	-0.572125	1.33354	23.5382	0.392649	0.71226	mir-1(gk276) / N2	cgp-1		GTP-binding protein cgp-1	Y38C9A.2	WBGene00000480
	P19626;P19625	14;14	P19625	-0.199384	-0.69845	0.299681	32.147	0.392691	0.71226	mir-1(gk276) / N2	mlc-1		Myosin regulatory light chain 1	C36E6.3	WBGene00003369
	Q20819	15	Q20819	-0.132717	-0.465002	0.199568	28.5237	0.392815	0.71226	mir-1(gk276) / N2	tsfm-1		Elongation factor Ts, mitochondrial	F55C5.5	WBGene00010094
	Q21544	12	Q21544	-0.166227	-0.582517	0.250063	27.448	0.39293	0.71226	mir-1(gk276) / N2			Uncharacterized protein	M153.1	WBGene00010924
	Q93805	4	Q93805	0.0880304	-0.132532	0.308593	27.0754	0.393144	0.71226	mir-1(gk276) / N2	ttr-31		TransThyretin-Related family domain	F58A3.5	WBGene00010225
	Q9BKQ9	9	Q9BKQ9	0.0781713	-0.118977	0.27532	29.0036	0.396125	0.715931	mir-1(gk276) / N2	cisd-3.2		CDGSH Iron Sulfur Domain protein homolog	Y67D2.3	WBGene00022053
	Q8I4L0;Q10033	6;6	Q10033	-0.448517	-1.57991	0.682874	26.3774	0.396217	0.715931	mir-1(gk276) / N2			Uncharacterized protein F15G9.1	F15G9.1	WBGene00008865
	Q9XWK3	2	Q9XWK3	0.346002	-0.527207	1.21921	24.3366	0.396432	0.715931	mir-1(gk276) / N2	npp-4		Nuclear Pore complex Protein	Y54E5A.4	WBGene00003790
	Q9N363	3	Q9N363	0.267563	-0.409249	0.944374	24.8771	0.397481	0.717066	mir-1(gk276) / N2	dcap-1		mRNA DeCAPping enzyme	Y55F3AM.12	WBGene00021929
	V6CIS4;V6CIS8;V6CL74;V6CL75;V6CJX7;V6CLC0;V6CLA2;V6CLA7	10;10;10;10;10;10;10;10	V6CLA2	-0.673132	-2.37871	1.03244	28.1902	0.398242	0.717668	mir-1(gk276) / N2	hecd-1		E3 ubiquitin-protein ligase hecd-1	C34D4.14	WBGene00016405
	P90993	9	P90993	-0.668143	-2.36263	1.02634	26.3229	0.398658	0.717668	mir-1(gk276) / N2	mrpl-41		39S ribosomal protein L41, mitochondrial	B0432.3	WBGene00015185
	O16517	20	O16517	-0.0971805	-0.343911	0.14955	31.8292	0.399155	0.717805	mir-1(gk276) / N2	atp-4		ATP synthase subunit	T05H4.12	WBGene00020275
	Q21752	26	Q21752	-0.069165	-0.244961	0.106631	32.8493	0.399656	0.717948	mir-1(gk276) / N2	vdac-1		Probable voltage-dependent anion-selective channel	R05G6.7	WBGene00019900
	Q95017	5	Q95017	-0.0870256	-0.309947	0.135895	27.3144	0.403185	0.721197	mir-1(gk276) / N2	ubc-9		SUMO-conjugating enzyme UBC9	F29B9.6	WBGene00006706
	O76630	2	O76630	-0.313646	-1.11773	0.490441	24.2499	0.403559	0.721197	mir-1(gk276) / N2	emc-2		EMC Endoplasmic Membrane protein Complex (Yeast EMC) homolog	Y57G7A.10	WBGene00021973
	Q18032	8	Q18032	-0.0765865	-0.27307	0.119897	29.5132	0.403883	0.721197	mir-1(gk276) / N2			Uncharacterized protein	C15H9.9	WBGene00015803
	Q86GU1;Q17849;Q5H9M9	11;11;7	Q17849	0.101142	-0.15834	0.360624	30.4344	0.403885	0.721197	mir-1(gk276) / N2	hsp-25		Heat Shock Protein	C09B8.6	WBGene00002023
	P54812	41	P54812	-0.186303	-0.664369	0.291763	27.0994	0.403983	0.721197	mir-1(gk276) / N2	cdc-48.2		Transitional endoplasmic reticulum ATPase homolog 2	C41C4.8	WBGene00008053
	O62250	5	O62250	0.125176	-0.196199	0.446552	27.8093	0.404212	0.721197	mir-1(gk276) / N2			Mitochondrial import inner membrane translocase subunit tim-16	F45G2.8	WBGene00009734
	Q09541	5	Q09541	-0.435593	-1.55446	0.683274	26.0842	0.404429	0.721197	mir-1(gk276) / N2	tpp-2		Tripeptidyl-peptidase 2	F21H12.6	WBGene00017686
	A0A0K3ASH2;O16264	9;9	O16264	-0.146705	-0.525116	0.231706	28.351	0.406326	0.723014	mir-1(gk276) / N2			Phosphatidylethanolamine-binding protein homolog F40A3.3	F40A3.3	WBGene00018218
	Q19537	5	Q19537	-0.831196	-2.97524	1.31285	24.5089	0.406339	0.723014	mir-1(gk276) / N2	rpa-1		Probable replication factor A 73 kDa subunit	F18A1.5	WBGene00017546
	Q22101	13	Q22101	-0.084903	-0.304093	0.134287	28.7277	0.406722	0.723014	mir-1(gk276) / N2			Uncharacterized protein	T02G5.7	WBGene00020166
	Q5FC71;A7LPG5	7;6	Q5FC71	-0.188485	-0.677324	0.300355	28.8132	0.408794	0.724598	mir-1(gk276) / N2	cisd-1		CDGSH Iron Sulfur Domain protein homolog	W02B12.15	WBGene00044026
	O45864	7	O45864	0.0962826	-0.153789	0.346354	31.6084	0.409446	0.724598	mir-1(gk276) / N2			Cytochrome b-c1 complex subunit 6	T27E9.2	WBGene00012094
	Q09601	6	Q09601	-0.346357	-1.24643	0.553712	25.5882	0.40969	0.724598	mir-1(gk276) / N2	npp-19		Nucleoporin NUP35	R06F6.5	WBGene00003805
	Q09583	7	Q09583	-0.135904	-0.490197	0.218389	27.578	0.411123	0.724598	mir-1(gk276) / N2	pas-7		Proteasome subunit alpha type-3	ZK945.2	WBGene00003928
	Q9N5R9	2	Q9N5R9	-0.445231	-1.60645	0.715987	25.985	0.411329	0.724598	mir-1(gk276) / N2	spt-16		FACT complex subunit spt-16	F55A3.3	WBGene00018849
	P34496	10	P34496	0.0866123	-0.139337	0.312562	30.047	0.411436	0.724598	mir-1(gk276) / N2	mtss-1		Single-stranded DNA-binding protein, mitochondrial	PAR2.1	WBGene00019800
	Q20774	8	Q20774	0.0983288	-0.158246	0.354903	27.7086	0.411541	0.724598	mir-1(gk276) / N2	dnj-13		DNaJ domain (Prokaryotic heat shock protein)	F54D5.8	WBGene00001031
	Q21746	18	Q21746	0.076611	-0.124016	0.277238	30.9174	0.413165	0.724598	mir-1(gk276) / N2	sgt-1		Small Glutamine-rich Tetratrico repeat protein	R05F9.10	WBGene00019893
	Q17880	6	Q17880	-0.598437	-2.167	0.970122	25.1274	0.413564	0.724598	mir-1(gk276) / N2	nuo-1		NADH dehydrogenase [ubiquinone] flavoprotein 1, mitochondrial	C09H10.3	WBGene00003831
	P91859	25	P91859	0.0566446	-0.0919751	0.205264	30.1148	0.414016	0.724598	mir-1(gk276) / N2	maph-1.1		Microtubule-associated protein homolog maph-1.1	F32A7.5	WBGene00009306
	W6RRU8;W6SBC7;Q9GYQ9;W6RTE4	8;8;8;8	Q9GYQ9	-0.409541	-1.4841	0.665013	25.7954	0.414029	0.724598	mir-1(gk276) / N2	ntl-4		NOT-Like (Yeast CCR4/NOT complex component)	C49H3.5	WBGene00003827
	G5EDD4	12	G5EDD4	-0.332368	-1.2048	0.540069	24.0342	0.41422	0.724598	mir-1(gk276) / N2	tba-4		Tubulin alpha chain	F44F4.11	WBGene00006530
	G5EDA6;X5M911	4;2	G5EDA6	-0.0807544	-0.292948	0.131439	29.4122	0.414688	0.724598	mir-1(gk276) / N2			Nx	C01F6.9	WBGene00007223
	Q09227	5	Q09227	0.885473	-1.44165	3.2126	25.3678	0.41477	0.724598	mir-1(gk276) / N2			Uncharacterized protein C08B11.9	C08B11.9	WBGene00007436
	Q95ZJ1	3	Q95ZJ1	-0.68	-2.46741	1.10741	25.0757	0.414842	0.724598	mir-1(gk276) / N2	gly-5		Polypeptide N-acetylgalactosaminyltransferase 5	Y39E4B.12	WBGene00001630
	Q17967	36	Q17967	-0.0819903	-0.29759	0.133609	31.6739	0.415019	0.724598	mir-1(gk276) / N2	pdi-1		Protein disulfide-isomerase 1	C14B1.1	WBGene00003962
	Q22551	3	Q22551	-0.501004	-1.81989	0.817883	24.9711	0.415517	0.724598	mir-1(gk276) / N2	grd-6		GRounDhog (Hedgehog-like family)	T18H9.1	WBGene00001695
	Q9XUV0	6	Q9XUV0	-0.118721	-0.431416	0.193974	28.0694	0.415754	0.724598	mir-1(gk276) / N2	pbs-5		Proteasome subunit pbs-5	K05C4.1	WBGene00003951
	Q9N362	16	Q9N362	-0.0986616	-0.359028	0.161705	28.7927	0.416626	0.724598	mir-1(gk276) / N2			Uncharacterized protein	Y55F3AM.13	WBGene00021930
	Q94128	6	Q94128	0.0800946	-0.131637	0.291826	27.2335	0.417399	0.724598	mir-1(gk276) / N2	wrt-1		Warthog protein 1	ZK1290.12	WBGene00006947
	Q17413	3	Q17413	-0.282788	-1.0305	0.464921	24.6554	0.417491	0.724598	mir-1(gk276) / N2			Probable uridine-cytidine kinase	B0001.4	WBGene00007089
	O17214;Q8ITZ0	22;8	O17214	-0.145469	-0.53067	0.239731	29.95	0.418157	0.724598	mir-1(gk276) / N2	fum-1		Probable fumarate hydratase, mitochondrial	H14A12.2	WBGene00001503
	O16927	7	O16927	0.0699996	-0.115403	0.255402	28.5025	0.418264	0.724598	mir-1(gk276) / N2			Signal recognition particle 14 kDa protein	F25G6.8	WBGene00017799
	A0A0S4XR43;A0A0S4XRD3;G5EBS4;H2KMJ3	12;8;4;4	A0A0S4XR43	-0.111349	-0.406729	0.184031	27.7709	0.418964	0.724598	mir-1(gk276) / N2	ccar-1		CCAR1 homolog	Y37A1B.1	WBGene00003085
	G5EDY2	6	G5EDY2	-0.486106	-1.77564	0.803429	26.0704	0.41897	0.724598	mir-1(gk276) / N2	wars-1	wrs-1	Tryptophanyl(W) Amino-acyl tRNA Synthetase	Y80D3A.1	WBGene00006945
	Q27522	13	Q27522	0.371625	-0.615679	1.35893	24.9246	0.419636	0.724598	mir-1(gk276) / N2	sams-5	tag-32	Probable S-adenosylmethionine synthase 5	T13A10.11	WBGene00006416
	Q23378	3	Q23378	0.141948	-0.235458	0.519353	25.9595	0.419981	0.724598	mir-1(gk276) / N2	ttr-48		TransThyretin-Related family domain	ZC64.2	WBGene00022515
	C6KRJ5	6	C6KRJ5	0.129429	-0.214698	0.473556	28.4793	0.419988	0.724598	mir-1(gk276) / N2			Uncharacterized protein	T20D3.14	WBGene00303026
	Q21018	6	Q21018	0.15282	-0.253827	0.559468	27.6292	0.42035	0.724598	mir-1(gk276) / N2	cri-3		Conserved regulator of innate immunity protein 3	F59A2.3	WBGene00010303
	Q21086	17	Q21086	-0.148181	-0.542812	0.246449	27.7211	0.420722	0.724598	mir-1(gk276) / N2	nst-1		Guanine nucleotide-binding protein-like 3 homolog	K01C8.9	WBGene00003821
	Q9XUE6	4	Q9XUE6	-0.207345	-0.759635	0.344946	24.9167	0.420803	0.724598	mir-1(gk276) / N2			Probable phosphomannomutase	F52B11.2	WBGene00009925
	Q8MQ25	3	Q8MQ25	-0.687046	-2.52076	1.14667	27.6097	0.421703	0.725322	mir-1(gk276) / N2			Uncharacterized protein	F54D8.6	WBGene00018802
	G5EFB5	12	G5EFB5	0.121809	-0.203567	0.447184	28.2836	0.422075	0.725322	mir-1(gk276) / N2	cpn-1		CPN-1	F43G9.9	WBGene00000777
	Q09236	13	Q09236	0.0783479	-0.131919	0.288614	28.3614	0.424175	0.727808	mir-1(gk276) / N2	copd-1		Probable coatomer subunit delta	C13B9.3	WBGene00015734
	G8JY40;Q8MQC6;P43510	9;9;9	P43510	-0.145488	-0.536119	0.245142	28.6076	0.424377	0.727808	mir-1(gk276) / N2	cpr-6		Cathepsin B-like cysteine proteinase 6	C25B8.3	WBGene00000786
	Q21166	3	Q21166	0.314694	-0.531837	1.16123	25.2939	0.425216	0.728515	mir-1(gk276) / N2	sur-5		Acetoacetyl-CoA synthetase	K03A1.5	WBGene00006351
	Q19970	8	Q19970	0.108124	-0.18338	0.399629	27.6887	0.426213	0.729488	mir-1(gk276) / N2	clec-180		C-type lectin domain-containing protein 180	F32E10.3	WBGene00017991
	Q8MXD9;Q4W4Y5	13;13	Q8MXD9	0.116951	-0.198747	0.432649	28.3855	0.426775	0.729717	mir-1(gk276) / N2			Uncharacterized protein	E02D9.1	WBGene00017098
	O45012	28	O45012	-0.0618034	-0.229461	0.105855	30.9774	0.42898	0.732005	mir-1(gk276) / N2	nol-58		NucleOLar protein	W01B11.3	WBGene00020915
	G5ED41	5	G5ED41	-0.301946	-1.12131	0.517414	24.197	0.429117	0.732005	mir-1(gk276) / N2	cand-1		Cullin-associated NEDD8-dissociated protein 1	Y102A5A.1	WBGene00013606
	H2L0E5;Q2L6X7;H2L0E6	2;2;2	Q2L6X7	0.682254	-1.17029	2.5348	26.0931	0.429403	0.732005	mir-1(gk276) / N2	mct-4		MonoCarboxylate Transporter family	K05B2.5	WBGene00003986
	G5EEN4	4	G5EEN4	-0.272167	-1.01392	0.469582	25.4178	0.431044	0.732816	mir-1(gk276) / N2	gck-3		Germinal center kinase 3	Y59A8B.23	WBGene00013355
	Q18066	31	Q18066	0.0655624	-0.113147	0.244272	32.5587	0.431116	0.732816	mir-1(gk276) / N2	dim-1		Disorganized muscle protein 1	C18A11.7/C18A11.8	WBGene00001000
	Q17417	2	Q17417	-0.142445	-0.530868	0.245977	27.0184	0.431285	0.732816	mir-1(gk276) / N2	col-149		COLlagen	B0024.1	WBGene00000722
	Q9N492	12	Q9N492	0.0654633	-0.113169	0.244096	28.4759	0.4316	0.732816	mir-1(gk276) / N2	pinn-1		Peptidyl-prolyl cis-trans isomerase	Y110A2AL.13	WBGene00022448
	Q9NEI6;D4YWC8	8;2	Q9NEI6	0.15061	-0.262052	0.563273	27.4313	0.433421	0.73452	mir-1(gk276) / N2	mrps-35		Mitochondrial Ribosomal Protein, Small	Y39B6A.39	WBGene00012697
	Q9XTI0	4	Q9XTI0	-0.114179	-0.427054	0.198695	27.0654	0.433466	0.73452	mir-1(gk276) / N2			Probable 3-hydroxyisobutyrate dehydrogenase, mitochondrial	B0250.5	WBGene00007122
	H2KZQ9;Q95ZV3;H2KZQ8	4;4;4	Q95ZV3	-0.296965	-1.11746	0.523528	26.4329	0.437135	0.73812	mir-1(gk276) / N2			Protein transport protein sec16	F13B9.1	WBGene00017419
	P91398	17	P91398	0.165004	-0.291256	0.621265	28.2698	0.43749	0.73812	mir-1(gk276) / N2	cey-3		C. Elegans Y-box	M01E11.5	WBGene00000474
	P91177	3	P91177	-0.481265	-1.8122	0.849668	25.9182	0.437546	0.73812	mir-1(gk276) / N2			Uncharacterized protein	C50F2.4	WBGene00016838
	Q9N2W5;U4PBA6	8;6	Q9N2W5	0.0805719	-0.142307	0.30345	28.4942	0.437661	0.73812	mir-1(gk276) / N2	ubxn-2		UBX domain-containing protein 2	Y94H6A.9	WBGene00022381
	Q9TZ68	11	Q9TZ68	0.14228	-0.251382	0.535943	28.7717	0.437758	0.73812	mir-1(gk276) / N2	cox-17		Cytochrome OXidase assembly protein	F40G9.2	WBGene00018240
	A5HU97;O45160	9;5	A5HU97	0.151813	-0.268995	0.572621	28.3794	0.438571	0.738759	mir-1(gk276) / N2			Uncharacterized protein	T28A11.2	WBGene00020869
	Q9BL34	11	Q9BL34	-0.0942283	-0.356006	0.167549	30.5282	0.439566	0.739705	mir-1(gk276) / N2	cox-6b	cox-6B	Cytochrome OXidase assembly protein	Y71H2AM.5	WBGene00022170
	P53019;P53017;Q95XU7;Q21244;Q94053;Q19832;Q18461;P53020	22;22;20;19;19;19;19;17	P53017	0.233102	-0.41785	0.884053	32.9201	0.441861	0.742426	mir-1(gk276) / N2	msp-19; msp-31; msp-40; msp-45; msp-50; msp-51; msp-53; msp-59; msp-64; msp-65; msp-81; msp-113; msp-142		Major sperm protein 19/31/40/45/50/51/53/59/61/65/81/113/142	F36H12.7_R05F9.13_C33F10.9_F58A6.8_C34F11.4_ZK354.5_R13H9.4_ZK354.11_ZK1248.6_ZK354.1_K07F5.1_ZK354.4_K05F1.2	WBGene00003435_WBGene00003443_WBGene00003426_WBGene00003438_WBGene00003469_WBGene00003467_WBGene00003429_WBGene00003446_WBGene00003457_WBGene00003458_WBGene00003452_WBGene00003468_WBGene00003444
	B5U8N2;Q7JLB1;G5ECZ2;G5EDI2;Q7JLB0;Q23188;Q23187	7;6;6;6;2;2;2	B5U8N2	0.0989823	-0.177554	0.375518	28.3863	0.442055	0.742426	mir-1(gk276) / N2	ret-1		Reticulon-like protein	W06A7.3	WBGene00004336
	Q09464	6	Q09464	-0.153105	-0.581974	0.275764	26.668	0.443218	0.743645	mir-1(gk276) / N2			Uncharacterized protein C16C10.8	C16C10.8	WBGene00007628
	Q9XWS4;I2HAJ2	19;13	Q9XWS4	0.126356	-0.228369	0.48108	33.2248	0.444194	0.744549	mir-1(gk276) / N2	rpl-30		Ribosomal Protein, Large subunit	Y106G6H.3	WBGene00004444
	Q9U222;A7DTF5	9;8	Q9U222	-0.44738	-1.70564	0.810877	26.6745	0.445003	0.745153	mir-1(gk276) / N2			Uncharacterized protein	Y56A3A.7	WBGene00013228
	Q9U1X9	6	Q9U1X9	-0.550398	-2.09989	0.999094	25.8462	0.445429	0.745153	mir-1(gk276) / N2	rla-2		Ribosomal protein, Large subunit, Acidic (P1)	Y62E10A.1	WBGene00004410
	O44471	4	O44471	-0.584862	-2.23511	1.06538	24.9719	0.446426	0.746088	mir-1(gk276) / N2	grd-10		GRounDhog (Hedgehog-like family)	F09D12.1	WBGene00001699
	Q23597	6	Q23597	-0.125326	-0.479306	0.228654	27.7816	0.446877	0.746109	mir-1(gk276) / N2			Uncharacterized protein	ZK809.3	WBGene00014086
	Q21230	7	Q21230	0.169399	-0.309696	0.648494	27.8651	0.447456	0.746344	mir-1(gk276) / N2			Eukaryotic translation initiation factor 2 subunit 2	K04G2.1	WBGene00010560
	Q09544	12	Q09544	0.12816	-0.235811	0.492131	31.7133	0.449284	0.748582	mir-1(gk276) / N2			ATP synthase subunit delta, mitochondrial	F58F12.1	WBGene00019061
	Q93761;Q22230	8;1	Q93761	0.1492	-0.274902	0.573302	27.5152	0.449677	0.748582	mir-1(gk276) / N2			Uncharacterized oxidoreductase F53C11.3	F53C11.3	WBGene00009973
	Q95XT5	9	Q95XT5	-0.221504	-0.852759	0.40975	28.3907	0.45081	0.749736	mir-1(gk276) / N2	trap-1		TRanslocon-Associated Protein	Y71F9AM.6	WBGene00022122
	Q19749	18	Q19749	0.0712084	-0.132639	0.275056	31.268	0.452781	0.752279	mir-1(gk276) / N2	dlat-1		Dihydrolipoyllysine-residue acetyltransferase component of pyruvate dehydrogenase complex, mitochondrial	F23B12.5	WBGene00009082
	Q21915	6	Q21915	-0.350784	-1.35811	0.656539	25.9921	0.454148	0.753431	mir-1(gk276) / N2	lpd-8		LiPid Depleted	R10H10.1	WBGene00003064
	Q19371	14	Q19371	-0.078564	-0.304314	0.147186	27.5907	0.454426	0.753431	mir-1(gk276) / N2	sec-24.1		Yeast SEC homolog	F12F6.6	WBGene00004755
	Q23447	1	Q23447	-0.217186	-0.841794	0.407423	26.8629	0.454802	0.753431	mir-1(gk276) / N2			Uncharacterized protein	ZK180.6	WBGene00022680
	P91223	11	P91223	0.109875	-0.206719	0.426469	27.8571	0.455635	0.754078	mir-1(gk276) / N2			Uncharacterized protein	F07E5.5	WBGene00017210
	Q20062	4	Q20062	0.188864	-0.35697	0.734698	24.2229	0.45695	0.755521	mir-1(gk276) / N2	marb-1		Mitochondrial Associated RiBonuclease homolog	F35G2.2	WBGene00009436
	O17607	8	O17607	0.0932821	-0.176911	0.363476	28.3689	0.457921	0.755655	mir-1(gk276) / N2	ruvb-1		RuvB-like 1	C27H6.2	WBGene00007784
	Q09501	14	Q09501	-0.0975557	-0.380685	0.185573	27.7162	0.45878	0.755655	mir-1(gk276) / N2	ifp-1		Intermediate filament protein ifp-1	C43C3.1	WBGene00002067
	P34621	6	P34621	0.129887	-0.247735	0.507508	27.8704	0.459544	0.755655	mir-1(gk276) / N2			Uncharacterized protein ZK1236.5	ZK1236.5	WBGene00022864
	P90747	3	P90747	-0.693861	-2.71386	1.32614	28.1256	0.460132	0.755655	mir-1(gk276) / N2	catp-8		Probable manganese-transporting ATPase catp-8	C10C6.6	WBGene00007514
	Q9N3D3	2	Q9N3D3	0.0988435	-0.188998	0.386685	25.5626	0.460259	0.755655	mir-1(gk276) / N2			Uncharacterized protein	Y54E10BR.4	WBGene00021843
	G5EEA2	14	G5EEA2	-0.180929	-0.708148	0.34629	29.2732	0.460538	0.755655	mir-1(gk276) / N2	lpr-3		LiPocalin-Related protein	W04G3.8	WBGene00012261
	P53013;G8JY74;Q86NF3;Q86NF4	48;41;10;6	P53013	-0.0644298	-0.252288	0.123429	36.0047	0.460799	0.755655	mir-1(gk276) / N2	eft-3; eft-4		Elongation factor 1-alpha	F31E3.5_R03G5.1	WBGene00001168_WBGene00001169
	Q22054	28	Q22054	-0.171689	-0.672818	0.32944	32.4864	0.461264	0.755655	mir-1(gk276) / N2	rps-16		40S ribosomal protein S16	T01C3.6	WBGene00004485
	Q6A573	9	Q6A573	-0.35898	-1.40694	0.688974	26.5117	0.461328	0.755655	mir-1(gk276) / N2	cdap-2		CD2AP homolog	Y44E3A.4	WBGene00021549
	Q9N5V3	13	Q9N5V3	-0.357054	-1.40024	0.686129	26.7622	0.461683	0.755655	mir-1(gk276) / N2	imb-3		IMportin Beta family	C53D5.6	WBGene00002077
	Q9XTT9;Q9TZ65;Q8MXF1;O16299	19;3;3;1	Q9XTT9	0.0747965	-0.143847	0.29344	28.8154	0.461913	0.755655	mir-1(gk276) / N2	rpt-6		Proteasome Regulatory Particle, ATPase-like	Y49E10.1	WBGene00004506
	Q09527	2	Q09527	-0.0841333	-0.331122	0.162855	26.593	0.463768	0.757095	mir-1(gk276) / N2			Adenylate kinase isoenzyme 6 homolog	E02H1.6	WBGene00008458
	P34419	3	P34419	-0.318262	-1.25499	0.618469	24.6284	0.464888	0.757095	mir-1(gk276) / N2			Putative esterase F42H10.6	F42H10.6	WBGene00018370
	P53014;G8JY79	16;6	P53014	-0.148396	-0.58532	0.288529	33.7045	0.465043	0.757095	mir-1(gk276) / N2	mlc-3		Myosin, essential light chain	F09F7.2	WBGene00003371
	O18286;H2L2C4;Q9N527;G5ED38;P08124	4;1;1;1;1	O18286	0.136155	-0.265223	0.537532	27.6581	0.465577	0.757095	mir-1(gk276) / N2	col-97		COLlagen	ZK1010.7	WBGene00000672
	Q20384;Q8MQ51	5;5	Q20384	-0.118988	-0.46983	0.231855	27.7055	0.465666	0.757095	mir-1(gk276) / N2	nucb-1		NUCleoBindin homolog	F44A6.1	WBGene00009674
	G5EDY8;Q8WQC9	5;5	Q8WQC9	-0.230457	-0.910054	0.44914	23.7754	0.465719	0.757095	mir-1(gk276) / N2	drp-1		Dynamin-Related Protein	T12E12.4	WBGene00001093
	Q18359	18	Q18359	0.0725857	-0.141555	0.286727	31.0132	0.465905	0.757095	mir-1(gk276) / N2			Probable NADH dehydrogenase [ubiquinone] 1 alpha subcomplex subunit 5	C33A12.1	WBGene00007880
	A8WFJ8;H2KYH9	10;5	A8WFJ8	0.128604	-0.251716	0.508923	27.5223	0.466949	0.758068	mir-1(gk276) / N2			Uncharacterized protein	C28G1.5	WBGene00016190
	Q9TZH6	3	Q9TZH6	-0.222413	-0.880977	0.436151	26.9372	0.467489	0.758223	mir-1(gk276) / N2	pcbd-1		Putative pterin-4-alpha-carbinolamine dehydratase	T10B11.1	WBGene00020397
	Q9BKU8	9	Q9BKU8	0.105062	-0.206685	0.416808	29.8551	0.468405	0.758986	mir-1(gk276) / N2	moag-4		MOdifier of protein AGgregation	Y37E3.4	WBGene00021348
	Q9TXP0	13	Q9TXP0	0.152811	-0.301258	0.60688	33.4649	0.469012	0.759196	mir-1(gk276) / N2	rps-27		40S ribosomal protein S27	F56E10.4	WBGene00004496
	Q18076;H2KYV3	14;14	Q18076	0.0623878	-0.123172	0.247947	29.9221	0.469427	0.759196	mir-1(gk276) / N2			Uncharacterized protein	C18B2.5	WBGene00015956
	Q8WQD8;Q21614	8;8	Q21614	0.130563	-0.25896	0.520087	27.4159	0.470747	0.76061	mir-1(gk276) / N2	cah-4		Carbonic AnHydrase	R01E6.3	WBGene00000282
	Q9XXR2	3	Q9XXR2	0.724189	-1.4437	2.89208	24.5487	0.47221	0.761594	mir-1(gk276) / N2			Uncharacterized protein	Y51A2D.14	WBGene00013081
	Q22918	9	Q22918	0.109891	-0.219379	0.43916	28.6719	0.472611	0.761594	mir-1(gk276) / N2			Eukaryotic translation initiation factor 5	C37C3.2	WBGene00016496
	Q86D21;P52709	8;8	P52709	-0.145976	-0.584103	0.292152	25.9751	0.473334	0.761594	mir-1(gk276) / N2	tars-1	trs-1	Threonine--tRNA ligase, cytoplasmic	C47D12.6	WBGene00006617
	Q11117	2	Q11117	-0.466636	-1.86926	0.935984	24.8549	0.47397	0.761594	mir-1(gk276) / N2	lmp-1		LAMP family protein lmp-1	C03B1.12	WBGene00003053
	Q8TA83	7	Q8TA83	0.0783661	-0.157258	0.31399	26.8913	0.474098	0.761594	mir-1(gk276) / N2	dnj-10		DnaJ homolog dnj-10	F22B7.5	WBGene00001028
	Q1NZ17;A5Z2T8;Q1NZ18;Q22015	4;2;2;2	Q1NZ17	0.0879358	-0.177122	0.352994	27.7724	0.475172	0.761594	mir-1(gk276) / N2			Uncharacterized protein	R31.2	WBGene00011270
	Q94261	3	Q94261	-0.139213	-0.558895	0.280469	26.3331	0.475235	0.761594	mir-1(gk276) / N2	cif-1	csn-7 eif-3.M	COP9/Signalosome and eIF3 complex-shared subunit 1	K08F11.3	WBGene00019543
	Q8T3D2;Q94010	5;5	Q94010	-0.290779	-1.16744	0.58588	24.3275	0.475263	0.761594	mir-1(gk276) / N2			Uncharacterized protein	T08G11.1	WBGene00011629
	Q09979	8	Q09979	-0.125491	-0.504574	0.253592	26.0631	0.476106	0.761594	mir-1(gk276) / N2	dhs-6		DeHydrogenases, Short chain	C17G10.8	WBGene00000970
	Q23050;H2L0M6	61;36	Q23050	0.0564181	-0.114058	0.226894	34.1576	0.476229	0.761594	mir-1(gk276) / N2	clik-1		CaLponIn-liKe proteins	T25F10.6	WBGene00020808
	Q20936	10	Q20936	0.0746757	-0.151118	0.300469	27.7499	0.476513	0.761594	mir-1(gk276) / N2	abu-13		Activated in Blocked Unfolded protein response	F57B9.9	WBGene00004133
	P36573	26	P36573	-0.0892964	-0.359431	0.180838	31.9186	0.476723	0.761594	mir-1(gk276) / N2	lec-1		32 kDa beta-galactoside-binding lectin	W09H1.6	WBGene00002264
	L8E951;P34416	5;5	P34416	0.624727	-1.26908	2.51854	24.3463	0.477612	0.762103	mir-1(gk276) / N2			LIM and SH3 domain protein F42H10.3	F42H10.3	WBGene00018367
	Q8WQG6;Q4TTA4;G5EDF2	6;6;6	Q8WQG6	-0.0682888	-0.275458	0.13888	28.8951	0.477937	0.762103	mir-1(gk276) / N2	nspc-7		Nematode Specific Peptide family, group C	C03G5.2	WBGene00015392
	G5EBP5	17	G5EBP5	0.0690933	-0.141492	0.279679	30.4516	0.479925	0.764558	mir-1(gk276) / N2			Uncharacterized protein	ZC247.1	WBGene00013859
	Q19853	4	Q19853	-0.269724	-1.09374	0.554291	24.9115	0.480931	0.765444	mir-1(gk276) / N2			Uncharacterized protein	F28B4.3	WBGene00017892
	Q9TZE4	8	Q9TZE4	0.104776	-0.216078	0.42563	28.875	0.481945	0.765803	mir-1(gk276) / N2			Uncharacterized protein	W04C9.4	WBGene00021026
	Q10657	6	Q10657	-0.115338	-0.469287	0.238611	27.5057	0.482848	0.765803	mir-1(gk276) / N2	tpi-1		Triosephosphate isomerase	Y17G7B.7	WBGene00006601
	G5ECT6	10	G5ECT6	0.0952718	-0.19727	0.387813	29.4643	0.4831	0.765803	mir-1(gk276) / N2	gpc-2		G Protein, Gamma subunit	F08B6.2	WBGene00001682
	O01532	5	O01532	-0.1581	-0.644388	0.328188	25.5684	0.483823	0.765803	mir-1(gk276) / N2	asp-5		ASpartyl Protease	F21F8.3	WBGene00000218
	Q20779	7	Q20779	-0.108052	-0.440807	0.224702	28.9709	0.484341	0.765803	mir-1(gk276) / N2	cox-6A	tag-174	Cytochrome c oxidase subunit 6A, mitochondrial	F54D8.2	WBGene00006519
	Q19093	6	Q19093	-0.0820696	-0.334897	0.170758	26.6011	0.484491	0.765803	mir-1(gk276) / N2			COX assembly mitochondrial protein	F01F1.2	WBGene00017159
	Q22308;B7WN80;O18056;O62372	13;2;2;1	Q22308	-0.0834652	-0.340625	0.173694	26.8806	0.484545	0.765803	mir-1(gk276) / N2	ddx-19		DEAD boX helicase homolog	T07D4.4	WBGene00011580
	Q17693	8	Q17693	-0.179085	-0.731405	0.373234	28.0879	0.484969	0.765803	mir-1(gk276) / N2	mthf-1		Probable methylenetetrahydrofolate reductase	C06A8.1	WBGene00015512
	Q86NJ8;Q8IG64;A0A0U1RML6;A0A0U1RML5;B3KLZ7	4;2;2;2;1	Q86NJ8	0.573347	-1.19633	2.34303	25.5076	0.485308	0.765803	mir-1(gk276) / N2	ppw-1		Piwi-like protein	C18E3.7	WBGene00004093
	Q9XXE2	7	Q9XXE2	-0.271634	-1.11073	0.567465	24.9027	0.485653	0.765803	mir-1(gk276) / N2			Uncharacterized protein	Y44A6D.2	WBGene00012853
	O61217	2	O61217	0.412925	-0.865567	1.69142	25.2323	0.486629	0.765893	mir-1(gk276) / N2			Purine nucleoside phosphorylase	K02D7.1	WBGene00019298
	Q8MNV8	2	Q8MNV8	0.301813	-0.632795	1.23642	24.6799	0.486692	0.765893	mir-1(gk276) / N2			Uncharacterized protein	C14B9.10	WBGene00015755
	Q18038	10	Q18038	-0.0829518	-0.340646	0.174742	27.4139	0.488047	0.765893	mir-1(gk276) / N2	let-716		Uncharacterized protein	C16A3.3	WBGene00002850
	Q6BES8	3	Q6BES8	-0.322612	-1.3252	0.679978	26.4011	0.488208	0.765893	mir-1(gk276) / N2			Uncharacterized protein	F53F4.16	WBGene00023419
	G5EE12	4	G5EE12	0.0565436	-0.119335	0.232423	26.9247	0.488585	0.765893	mir-1(gk276) / N2	cash-1		CKA And Striatin Homolog	K07C5.8	WBGene00010631
	G5EBF3	15	G5EBF3	-0.167318	-0.688377	0.353741	28.8663	0.489086	0.765893	mir-1(gk276) / N2	pud-2.1	pud-2.2	Protein Up-regulated in Daf-2(Gf)	F15E11.1_F15E11.14	WBGene00017490_WBGene00017500
	H1ZUX7	7	H1ZUX7	0.0989749	-0.209536	0.407486	27.962	0.489478	0.765893	mir-1(gk276) / N2			Uncharacterized protein	Y65B4BM.3	WBGene00302974
	Q9XX57	16	Q9XX57	-0.151864	-0.625309	0.321581	32.5284	0.489545	0.765893	mir-1(gk276) / N2	dct-16		DAF-16/FOXO Controlled, germline Tumor affecting	Y38H6C.1	WBGene00012615
	Q93408	7	Q93408	0.0856965	-0.181639	0.353032	27.5174	0.489817	0.765893	mir-1(gk276) / N2			Uncharacterized protein D2005.3	D2005.3	WBGene00008398
	Q20641	54	Q20641	0.0805921	-0.171052	0.332236	30.2504	0.490207	0.765893	mir-1(gk276) / N2	nmy-1		Non-muscle MYosin	F52B10.1	WBGene00003776
	Q7JLH5	3	Q7JLH5	0.0963676	-0.204963	0.397698	27.3858	0.490808	0.766129	mir-1(gk276) / N2	pqn-70		Prion-like-(Q/N-rich)-domain-bearing protein	T19B10.4	WBGene00004152
	Q23680	6	Q23680	-0.173052	-0.718344	0.37224	28.9804	0.494053	0.770488	mir-1(gk276) / N2	vha-9		Probable V-type proton ATPase subunit F	ZK970.4	WBGene00006918
	Q22100	17	Q22100	-0.0788144	-0.32751	0.169881	31.1815	0.494645	0.770705	mir-1(gk276) / N2	kat-1		Acetyl-CoA acetyltransferase homolog, mitochondrial	T02G5.8	WBGene00002183
	Q20751	18	Q20751	0.0952783	-0.206338	0.396894	33.9676	0.495999	0.772108	mir-1(gk276) / N2	iff-2		Eukaryotic translation initiation factor 5A-2	F54C9.1	WBGene00002065
	G5EFH8;H9G2P9	4;3	G5EFH8	0.833349	-1.80901	3.47571	26.8149	0.49668	0.772332	mir-1(gk276) / N2	cbs-1		Cystathionine Beta-Synthase	ZC373.1	WBGene00013866
	Q9XTZ2;G3MU77	6;3	Q9XTZ2	0.0685241	-0.149047	0.286095	27.4267	0.497252	0.772332	mir-1(gk276) / N2	rsp-8		SR Protein (Splicing factor)	C18D11.4	WBGene00004705
	P91430	6	P91430	0.0721326	-0.157033	0.301298	27.5897	0.497503	0.772332	mir-1(gk276) / N2	uba-5		Ubiquitin-like modifier-activating enzyme 5	T03F1.1	WBGene00020184
	Q19694	3	Q19694	-0.679789	-2.84693	1.48736	25.9764	0.498948	0.773757	mir-1(gk276) / N2	ttr-35		TransThyretin-Related family domain	F22A3.2	WBGene00017688
	Q9NHZ6	3	Q9NHZ6	0.0956909	-0.209647	0.401029	24.3252	0.49933	0.773757	mir-1(gk276) / N2	oaz-1		Ornithine decarboxylase antizyme	ZK484.1	WBGene00022748
	G5EDV3	18	G5EDV3	0.0777457	-0.170867	0.326358	30.5874	0.500232	0.774449	mir-1(gk276) / N2	cey-4		C. Elegans Y-box	Y39A1C.3	WBGene00000475
	B6VQ96;O45569	9;9	O45569	-0.0595629	-0.250827	0.131701	27.1972	0.501974	0.776247	mir-1(gk276) / N2	nep-17		NEPrilysin metallopeptidase family	F54F11.2	WBGene00010070
	P53596	29	P53596	0.0785443	-0.174656	0.331744	31.9755	0.503598	0.776247	mir-1(gk276) / N2	sucl-1		Succinate--CoA ligase [ADP/GDP-forming] subunit alpha, mitochondrial	C05G5.4	WBGene00007350
	O17839	2	O17839	-0.524986	-2.21823	1.16826	24.4008	0.503811	0.776247	mir-1(gk276) / N2	mrpl-54		Mitochondrial Ribosomal Protein, Large	F25H5.6	WBGene00009128
	Q18421	12	Q18421	-0.0563779	-0.238374	0.125618	30.6646	0.504177	0.776247	mir-1(gk276) / N2			GrpE protein homolog, mitochondrial	C34C12.8	WBGene00007927
	G5EGK1;A0A0K3ATT6;G4S9F5;W6SBK6	49;48;41;26	G5EGK1	-0.0529035	-0.223697	0.11789	29.7195	0.504208	0.776247	mir-1(gk276) / N2	tln-1		Talin	Y71G12B.11	WBGene00006771
	Q23451	5	Q23451	-0.354521	-1.49994	0.790899	26.2663	0.504531	0.776247	mir-1(gk276) / N2	rad-23		Uncharacterized protein	ZK20.3	WBGene00013924
	Q18409	5	Q18409	-0.590861	-2.50164	1.31992	27.4046	0.504916	0.776247	mir-1(gk276) / N2	rsp-6	srp-1	Probable splicing factor, arginine/serine-rich 6	C33H5.12	WBGene00004703
	Q09635	9	Q09635	0.136501	-0.305539	0.57854	29.5558	0.505492	0.776247	mir-1(gk276) / N2	wrt-10		WaRThog (Hedgehog-like family)	ZK1290.8	WBGene00006956
	Q9BL07	4	Q9BL07	-0.0767915	-0.326051	0.172468	27.7999	0.506459	0.776247	mir-1(gk276) / N2			Putative phospholipase B-like 3	Y54F10AM.8	WBGene00021852
	G5EED5	1	G5EED5	-0.481364	-2.04569	1.08297	25.2898	0.506953	0.776247	mir-1(gk276) / N2	scm-1	SC	Secretory carrier-associated membrane protein	M01D7.2	WBGene00004743
	P34492	4	P34492	-0.0766594	-0.326435	0.173116	26.3129	0.508031	0.776247	mir-1(gk276) / N2			Putative NipSnap protein K02D10.1	K02D10.1	WBGene00019301
	P90921	5	P90921	0.43194	-0.976259	1.84014	26.4484	0.508276	0.776247	mir-1(gk276) / N2	asg-1		Probable ATP synthase subunit g 1, mitochondrial	K07A12.3	WBGene00000209
	P34642	5	P34642	0.080723	-0.182473	0.343919	27.491	0.508316	0.776247	mir-1(gk276) / N2			Signal recognition particle 9 kDa protein	ZK512.4	WBGene00013984
	Q9XWV3	2	Q9XWV3	0.361805	-0.818233	1.54184	24.9209	0.508448	0.776247	mir-1(gk276) / N2	arx-5		Probable actin-related protein 2/3 complex subunit 3	Y37D8A.1	WBGene00000203
	B2D6P1;P90762;Q8MQB5	15;15;15	P90762	-0.0619902	-0.264273	0.140292	30.4413	0.508652	0.776247	mir-1(gk276) / N2	rmd-2		Regulator of Microtubule Dynamics	C27H6.4	WBGene00007786
	Q09996	5	Q09996	-0.106126	-0.452457	0.240205	26.145	0.508686	0.776247	mir-1(gk276) / N2	lars-1	lrs-1	Leucine--tRNA ligase	R74.1	WBGene00003073
	Q9N306	5	Q9N306	-0.104099	-0.444579	0.236381	26.6132	0.509614	0.776968	mir-1(gk276) / N2			Uncharacterized protein	Y61A9LA.10	WBGene00022021
	Q9U213	2	Q9U213	0.135464	-0.309014	0.579942	25.202	0.510929	0.778004	mir-1(gk276) / N2	rsr-2		SR protein related	Y57A10A.19	WBGene00013260
	P52819	18	P52819	-0.206031	-0.882507	0.470445	32.1223	0.511208	0.778004	mir-1(gk276) / N2	rpl-22		60S ribosomal protein L22	C27A2.2	WBGene00004434
	Q95Y15;M1Z882	3;2	Q95Y15	-0.466516	-2.0013	1.06826	23.0096	0.512024	0.778551	mir-1(gk276) / N2	npp-8		Nuclear Pore complex Protein	Y41D4B.19	WBGene00003794
	Q9XU97	7	Q9XU97	0.0753482	-0.173092	0.323788	31.0704	0.512944	0.779202	mir-1(gk276) / N2			Uncharacterized protein	F44E5.1	WBGene00009688
	P91455	3	P91455	0.720481	-1.65755	3.09852	25.451	0.513367	0.779202	mir-1(gk276) / N2			Adenine phosphoribosyltransferase	T19B4.3	WBGene00020557
	Q22666	17	Q22666	0.0557079	-0.129089	0.240504	28.8287	0.515432	0.78164	mir-1(gk276) / N2			Uncharacterized protein	T22C1.6	WBGene00011917
	A0A078BPL2;G5EGP8	3;3	G5EGP8	-0.0598376	-0.258781	0.139105	27.4331	0.516355	0.782174	mir-1(gk276) / N2	cpz-1		CathePsin Z	F32B5.8	WBGene00000788
	Q21270	2	Q21270	-0.327461	-1.4171	0.762177	25.1768	0.516703	0.782174	mir-1(gk276) / N2	cogc-6		Conserved oligomeric Golgi complex subunit 6	K07C11.9	WBGene00019481
	O17915	11	O17915	-0.0536049	-0.232194	0.124984	29.01	0.517201	0.782204	mir-1(gk276) / N2	ran-1		GTP-binding nuclear protein ran-1	K01G5.4	WBGene00004302
	Q9XVS4;Q564W7	21;20	Q9XVS4	0.116895	-0.272969	0.506759	30.8805	0.517642	0.782204	mir-1(gk276) / N2	dao-5		Dauer or Aging adult Overexpression	C25A1.10	WBGene00000931
	Q04908	7	Q04908	0.0648099	-0.151852	0.281471	26.904	0.518605	0.782453	mir-1(gk276) / N2	rpn-3		26S proteasome non-ATPase regulatory subunit 3	C30C11.2	WBGene00004460
	Q45EK1	2	Q45EK1	-0.261123	-1.13532	0.613071	25.6489	0.519191	0.782453	mir-1(gk276) / N2	ttr-36		TransThyretin-Related family domain	F22A3.7	WBGene00044605
	Q19952	3	Q19952	-0.158058	-0.688011	0.371895	25.1782	0.519809	0.782453	mir-1(gk276) / N2	lsm-4		Probable U6 snRNA-associated Sm-like protein LSm4	F32A5.7	WBGene00003078
	Q9XXD4	4	Q9XXD4	0.0564728	-0.133075	0.246021	28.3932	0.520241	0.782453	mir-1(gk276) / N2			Putative H/ACA ribonucleoprotein complex subunit 2-like protein	Y48A6B.3	WBGene00012964
	Q21000	43	Q21000	0.0486684	-0.115008	0.212345	31.7999	0.521049	0.782453	mir-1(gk276) / N2	myo-5		MYOsin heavy chain structural genes	F58G4.1	WBGene00019064
	Q21633	4	Q21633	-0.24207	-1.05622	0.572081	25.4863	0.52107	0.782453	mir-1(gk276) / N2	ubc-18		UBiquitin Conjugating enzyme	R01H2.6	WBGene00006713
	O01812;REV__O62173	25;1	O01812	-0.0787924	-0.344036	0.186451	32.8286	0.521443	0.782453	mir-1(gk276) / N2	lbp-6		Fatty acid-binding protein homolog 6	W02D3.5	WBGene00002258
	Q22537	21	Q22537	-0.0934965	-0.40863	0.221637	27.4382	0.521949	0.782453	mir-1(gk276) / N2			Uncharacterized protein	T17H7.1	WBGene00020550
	Q19782	5	Q19782	0.104521	-0.248231	0.457272	26.5636	0.522481	0.782453	mir-1(gk276) / N2	ifd-2		Intermediate filament protein ifd-2	F25E2.4	WBGene00002058
	Q20628	3	Q20628	0.101346	-0.240729	0.443422	26.2049	0.522524	0.782453	mir-1(gk276) / N2	cdd-2		Cytidine deaminase	F49E8.4	WBGene00000392
	H2KZ18;A0A2C9C377;H2KZ19;D7SFL2	10;10;9;8	H2KZ18	0.0570856	-0.135756	0.249927	28.2688	0.522861	0.782453	mir-1(gk276) / N2	ampd-1		AMP deaminase	C34F11.3	WBGene00016415
	P10299	5	P10299	0.0546354	-0.130328	0.239598	27.5195	0.523738	0.783077	mir-1(gk276) / N2	gst-1		Glutathione S-transferase P	R107.7	WBGene00001749
	Q9XUU9	2	Q9XUU9	-0.284007	-1.25134	0.683325	25.6854	0.526199	0.785431	mir-1(gk276) / N2			Protein jagunal homolog	K05C4.2	WBGene00010579
	Q09EF7	3	Q09EF7	-0.177645	-0.783088	0.427798	29.1999	0.526454	0.785431	mir-1(gk276) / N2	che-10	dyf-14	Rootletin	F35D11.11	WBGene00018051
	Q21432	2	Q21432	-0.298893	-1.31931	0.721525	24.5963	0.527145	0.785431	mir-1(gk276) / N2	nas-11		Zinc metalloproteinase nas-11	K11G12.1	WBGene00003530
	Q18100;Q53U86;Q4PIU9;Q53U87;W6RTH3;W6RRX6	8;8;8;8;2;2	Q18100	0.0582503	-0.140621	0.257122	26.8971	0.527156	0.785431	mir-1(gk276) / N2	sax-7		Sensory AXon guidance	C18F3.2	WBGene00004732
	Q22758	8	Q22758	-0.160239	-0.710148	0.38967	26.4033	0.529246	0.786804	mir-1(gk276) / N2			Uncharacterized protein	T24H7.2	WBGene00020781
	P91277;Q8I7G8;Q8I7G9;Q8T3B5;Q8I7G7	18;17;6;3;3	P91277	0.0761571	-0.18532	0.337634	29.7946	0.529433	0.786804	mir-1(gk276) / N2	hrpk-1		Heterogeneous nuclear RibonucleoProtein (HnRNP) K homolog	F26B1.2	WBGene00017816
	Q9TZ90	5	Q9TZ90	-0.503718	-2.23374	1.2263	25.2818	0.529562	0.786804	mir-1(gk276) / N2	mrpl-40		Mitochondrial Ribosomal Protein, Large	F54C4.1	WBGene00018793
	H2L0N9;Q6AW03	8;8	Q6AW03	-0.0645423	-0.286459	0.157375	27.2616	0.530011	0.786804	mir-1(gk276) / N2			Uncharacterized protein	Y37E3.17	WBGene00021355
	Q9N4C6	2	Q9N4C6	0.325578	-0.796085	1.44724	24.9129	0.530808	0.786804	mir-1(gk276) / N2			Uncharacterized protein	Y76B12C.3	WBGene00022297
	G5ECY6	2	G5ECY6	0.300034	-0.733735	1.3338	24.6214	0.53085	0.786804	mir-1(gk276) / N2	chn-1	1G758	C-term of Hsp70-iNteracting protein (CHIP family)	T09B4.10	WBGene00000500
	Q22235	30	Q22235	0.0526733	-0.129802	0.235148	31.2552	0.533033	0.787425	mir-1(gk276) / N2	enpl-1		Endoplasmin homolog	T05E11.3	WBGene00011480
	Q04907	5	Q04907	-0.0960327	-0.429174	0.237109	26.031	0.533584	0.787425	mir-1(gk276) / N2	mrpl-32		Probable 39S ribosomal protein L32, mitochondrial	C30C11.1	WBGene00016249
	Q7YX52	3	Q7YX52	0.154068	-0.381824	0.689961	25.9931	0.534649	0.787425	mir-1(gk276) / N2	mrpl-53		Mitochondrial Ribosomal Protein, Large	E02H1.8	WBGene00008459
	H2KYR1;Q8MNX8	29;2	H2KYR1	0.0648648	-0.161319	0.291049	33.7295	0.535651	0.787425	mir-1(gk276) / N2	vig-1		VIG (Drosophila Vasa Intronic Gene) ortholog	F56D12.5	WBGene00006924
	O18236	7	O18236	0.0758671	-0.188755	0.340489	29.0205	0.535761	0.787425	mir-1(gk276) / N2	nuo-3		NADH Ubiquinone Oxidoreductase	Y57G11C.12	WBGene00013308
	O02089	14	O02089	-0.142752	-0.640842	0.355339	29.1146	0.535903	0.787425	mir-1(gk276) / N2	msra-1		Methionine Sulfoxide Reductase A	F43E2.5	WBGene00018393
	O45757	5	O45757	0.0590918	-0.147205	0.265389	26.7801	0.536123	0.787425	mir-1(gk276) / N2			Uncharacterized protein	T06E6.1	WBGene00011538
	P90889	13	P90889	0.0827432	-0.206199	0.371685	28.6907	0.536226	0.787425	mir-1(gk276) / N2			Uncharacterized protein	F55H12.4	WBGene00010135
	Q93725	2	Q93725	0.136914	-0.342206	0.616033	27.4856	0.53707	0.787425	mir-1(gk276) / N2	ned-8		NEDD8	F45H11.2	WBGene00003587
	P17343	2	P17343	-0.370037	-1.66817	0.928095	24.8386	0.538059	0.787425	mir-1(gk276) / N2	gpb-1		Guanine nucleotide-binding protein subunit beta-1	F13D12.7	WBGene00001679
	Q20720	23	Q20720	0.0511896	-0.128464	0.230843	29.6695	0.538224	0.787425	mir-1(gk276) / N2			Uncharacterized protein	F53F4.11	WBGene00009993
	Q09476	5	Q09476	0.0760811	-0.191347	0.34351	26.555	0.538844	0.787425	mir-1(gk276) / N2	pxl-1	tag-327	Paxillin homolog 1	C28H8.6	WBGene00016197
	Q86FL8	18	Q86FL8	-0.0914137	-0.41309	0.230263	30.2972	0.539281	0.787425	mir-1(gk276) / N2	spp-5		SaPosin-like Protein family	T08A9.9	WBGene00004990
	Q65XX9;Q65XX8	10;7	Q65XX9	-0.331782	-1.50003	0.836471	24.7108	0.539534	0.787425	mir-1(gk276) / N2	mvk-1		MeValonate Kinase	Y42G9A.4	WBGene00021534
	P91020	13	P91020	-0.0885579	-0.400481	0.223366	29.1302	0.539659	0.787425	mir-1(gk276) / N2			Uncharacterized protein	C07D8.6	WBGene00015565
	O16259	34	O16259	0.081972	-0.206891	0.370835	30.4326	0.539847	0.787425	mir-1(gk276) / N2	sti-1		Stress-induced-phosphoprotein 1	R09E12.3	WBGene00019983
	Q19790;Q95ZV0;H9G2T6;H9G2U2;H9G2T7;H9G2U6;H9G2U5;H9G2T8;D3YT34;D3YT33;A0A061ACN9;Q7JLY3;H9G2U3;H9G2U1;H9G2T9;H9G2U0;H9G2U7	15;12;10;10;7;7;4;4;4;4;4;4;3;3;3;1;1	Q19790	-0.0692219	-0.313267	0.174823	28.3053	0.54003	0.787425	mir-1(gk276) / N2	dur-1		Dauer Up-Regulated	F25H8.5	WBGene00001113
	P27420;V6CJ24	52;24	P27420	-0.0644244	-0.291576	0.162727	33.2486	0.540064	0.787425	mir-1(gk276) / N2	hsp-3	hsp70c	Heat shock 70 kDa protein C	C15H9.6	WBGene00002007
	Q8MNS3;P49595	8;8	P49595	0.0690805	-0.175157	0.313318	27.7849	0.541154	0.787425	mir-1(gk276) / N2			Probable protein phosphatase 2C F42G9.1	F42G9.1	WBGene00018362
	P34477	2	P34477	-0.555304	-2.52046	1.40986	25.4704	0.541528	0.787425	mir-1(gk276) / N2	ubc-7		Probable ubiquitin-conjugating enzyme E2 7	F58A4.10	WBGene00006704
	Q23315	23	Q23315	-0.0513027	-0.233131	0.130526	28.7359	0.542125	0.787425	mir-1(gk276) / N2	ears-1		Glutamyl(E) Amino-acyl tRNA Synthetase	ZC434.5	WBGene00001337
	O62213	12	O62213	0.0812912	-0.207025	0.369607	30.1099	0.542402	0.787425	mir-1(gk276) / N2	cey-1		C. Elegans Y-box	F33A8.3	WBGene00000472
	C6KRK8;Q21890;C6KRK9	7;7;3	Q21890	-0.129923	-0.591143	0.331297	26.2886	0.542762	0.787425	mir-1(gk276) / N2			Uncharacterized protein R102.4	R102.4	WBGene00011291
	Q9BIF4	2	Q9BIF4	0.106278	-0.271042	0.483598	25.3705	0.542803	0.787425	mir-1(gk276) / N2	ehs-1		EHS-1	ZK1248.3	WBGene00001224
	V6CLV0;V6CKH6;V6CLQ8;V6CKI4;H2KZA3;V6CJC7;V6CJD2;V6CLV2;V6CLW0;V6CLT8;Q9TY23	39;38;38;37;37;36;36;36;35;18;17	V6CLV0	0.0541093	-0.138008	0.246226	30.7785	0.542829	0.787425	mir-1(gk276) / N2	pqn-22		Prion-like-(Q/N-rich)-domain-bearing protein	C46G7.4	WBGene00004112
	Q93545;Q93544	4;1	Q93545	-0.392004	-1.78746	1.00345	24.1355	0.543857	0.787758	mir-1(gk276) / N2			Uncharacterized protein	F20G2.2	WBGene00008986
	P34689;Q966L9;O01836	28;9;2	P34689	-0.0580314	-0.264677	0.148614	30.6424	0.543983	0.787758	mir-1(gk276) / N2	glh-1		ATP-dependent RNA helicase glh-1	T21G5.3	WBGene00001598
	V6CLW5;Q9XUY5	7;7	Q9XUY5	-0.0809683	-0.371118	0.209181	27.0051	0.546473	0.789429	mir-1(gk276) / N2	nkb-3		Probable sodium/potassium-transporting ATPase subunit beta-3	F55F3.3	WBGene00010117
	Q21021;Q86G90	22;22	Q21021	0.0499068	-0.129136	0.228949	29.845	0.546916	0.789429	mir-1(gk276) / N2	npp-9		Nuclear Pore complex Protein	F59A2.1	WBGene00003795
	Q18480	5	Q18480	-0.185076	-0.849323	0.479171	27.9107	0.547082	0.789429	mir-1(gk276) / N2	col-175		COLlagen	C35B8.1	WBGene00000748
	K8F801	5	K8F801	-0.165957	-0.761943	0.430029	24.7346	0.547317	0.789429	mir-1(gk276) / N2	cdh-12		CaDHerin family	Y71D11A.1	WBGene00022103
	O16487	4	O16487	-0.303508	-1.39475	0.787732	26.2957	0.54778	0.789429	mir-1(gk276) / N2			Uncharacterized protein	B0238.11	WBGene00015075
	Q09657	6	Q09657	-0.440214	-2.02353	1.1431	24.9873	0.547918	0.789429	mir-1(gk276) / N2			Uncharacterized protein	ZK1320.9	WBGene00014258
	Q3LFN1;Q965W1	6;5	Q3LFN1	0.492714	-1.28204	2.26747	26.1526	0.548496	0.789593	mir-1(gk276) / N2	lbp-9		Lipid Binding Protein	Y40B10A.1	WBGene00021486
	Q9XW18	2	Q9XW18	-0.455443	-2.10334	1.19245	26.5413	0.550256	0.791458	mir-1(gk276) / N2	coa-5		Cytochrome Oxidase Assembly subunits	Y18D10A.16	WBGene00012483
	Q9NA98	2	Q9NA98	-0.170373	-0.787738	0.446992	26.999	0.550837	0.791625	mir-1(gk276) / N2	arp-1		Actin-Related Proteins	Y53F4B.22	WBGene00013168
	Q19264	8	Q19264	-0.0807844	-0.374752	0.213184	27.2293	0.552484	0.793322	mir-1(gk276) / N2			Putative deoxyribose-phosphate aldolase	F09E5.3	WBGene00017283
	Q94399	5	Q94399	-0.138301	-0.643597	0.366995	27.6621	0.55405	0.794901	mir-1(gk276) / N2	col-63		COLlagen	ZK265.2	WBGene00000639
	Q94402	5	Q94402	-0.143203	-0.667391	0.380985	25.6996	0.554778	0.795275	mir-1(gk276) / N2	nol-16		Nucleolar protein 16	ZK265.6	WBGene00013958
	Q966I8	3	Q966I8	-0.677991	-3.16387	1.80789	25.6734	0.555424	0.795531	mir-1(gk276) / N2	pbs-1		Proteasome subunit beta type	K08D12.1	WBGene00003947
	O02485	4	O02485	0.0561253	-0.150139	0.26239	26.0429	0.556326	0.795838	mir-1(gk276) / N2			Uncharacterized protein ZK1073.1	ZK1073.1	WBGene00014213
	Q10051	5	Q10051	-0.0850021	-0.397655	0.227651	26.8903	0.556653	0.795838	mir-1(gk276) / N2	prp-19		Pre-mRNA-processing factor 19	T10F2.4	WBGene00020423
	Q9UAV5;Q8IA49;Q8IA50	25;21;18	Q9UAV5	-0.0829262	-0.388249	0.222396	31.8438	0.55704	0.795838	mir-1(gk276) / N2	mdh-1		Malate dehydrogenase	F46E10.10	WBGene00018491
	Q93425	8	Q93425	-0.142665	-0.669377	0.384046	26.8558	0.558097	0.796602	mir-1(gk276) / N2	mrps-5		Putative 28S ribosomal protein S5, mitochondrial	E02A10.1	WBGene00008452
	Q09556	4	Q09556	0.193469	-0.523074	0.910011	25.229	0.559321	0.796602	mir-1(gk276) / N2			Uncharacterized protein F33H1.3	F33H1.3	WBGene00009364
	O45060	8	O45060	-0.123978	-0.583182	0.335225	31.0375	0.559345	0.796602	mir-1(gk276) / N2			Uncharacterized protein	C35B1.5	WBGene00016435
	Q2XN18	6	Q2XN18	-0.167576	-0.788421	0.453269	26.0818	0.559446	0.796602	mir-1(gk276) / N2	spp-14		SaPosin-like Protein family	K09F5.3	WBGene00004999
	Q9XUY0	2	Q9XUY0	0.422176	-1.149	1.99336	27.1743	0.561184	0.798232	mir-1(gk276) / N2			Uncharacterized protein	F56G4.6	WBGene00010161
	Q21154	4	Q21154	-0.440724	-2.08336	1.20192	25.2706	0.561754	0.798232	mir-1(gk276) / N2	moma-1		MICOS complex subunit MIC27	K02F3.10	WBGene00019333
	C1P641;C1P640;A0A061AD21;G5EEV6;A0A061AJI9;Q21313	70;70;70;70;70;70	Q21313	0.0395658	-0.108361	0.187493	30.5965	0.562948	0.798232	mir-1(gk276) / N2	epi-1		Laminin-like protein epi-1	K08C7.3	WBGene00001328
	G5ECG0	6	G5ECG0	0.0845444	-0.232328	0.401417	27.3897	0.563894	0.798232	mir-1(gk276) / N2	tac-1	2P40	Transforming acid coiled-coil-containing protein 1	Y54E2A.3	WBGene00006381
	Q9U1W8;A0A061AIX6	2;1	Q9U1W8	0.102096	-0.280643	0.484836	25.147	0.563977	0.798232	mir-1(gk276) / N2	lsm-3		LSM Sm-like protein	Y62E10A.12	WBGene00003077
	Q17698;Q23683	15;1	Q17698	-0.105151	-0.499348	0.289046	31.0985	0.563984	0.798232	mir-1(gk276) / N2	nlp-77		Neuropeptide-Like Protein	C06A8.3	WBGene00015514
	Q9NF11	9	Q9NF11	-0.197922	-0.940864	0.545021	26.5618	0.564478	0.798232	mir-1(gk276) / N2	hprt-1		Hypoxanthine phosphoribosyltransferase	Y105E8B.5	WBGene00013690
	P91207	2	P91207	-0.377864	-1.79651	1.04078	25.5614	0.564545	0.798232	mir-1(gk276) / N2	grsp-4		Glycine Rich Secreted Protein	F07C4.7	WBGene00017201
	Q19554	10	Q19554	-0.0510384	-0.242821	0.140744	27.5448	0.564873	0.798232	mir-1(gk276) / N2	abcf-1		ABC transporter, class F	F18E2.2	WBGene00006512
	Q9XWW1	2	Q9XWW1	-0.265274	-1.26422	0.733669	24.7796	0.565695	0.798232	mir-1(gk276) / N2	hpo-21		Probable signal peptidase complex subunit 2	Y37D8A.10	WBGene00012550
	G5EFK5;G5EES6	3;3	G5EES6	0.311681	-0.86271	1.48607	24.9943	0.565921	0.798232	mir-1(gk276) / N2	ufd-3		Ubiquitin Fusion Degradation (Yeast UFD homolog)	C05C10.6	WBGene00007333
	Q21926	6	Q21926	0.370664	-1.02853	1.76986	26.3744	0.566619	0.798232	mir-1(gk276) / N2	iars-1	irs-1	Isoleucine--tRNA ligase, cytoplasmic	R11A8.6	WBGene00002152
	Q8MXT1	6	Q8MXT1	-0.0821395	-0.392864	0.228585	27.5181	0.567432	0.798232	mir-1(gk276) / N2	prdx-6		PeRoxireDoXin	Y38C1AA.11	WBGene00021401
	C7FZU4;C7FZU3;Q93791	11;11;11	Q93791	-0.108033	-0.516735	0.300668	28.1586	0.567453	0.798232	mir-1(gk276) / N2	nid-1		NIDogen (Basement membrane protein)	F54F3.1	WBGene00003738
	O17387	5	O17387	0.0846111	-0.235623	0.404845	26.5312	0.567621	0.798232	mir-1(gk276) / N2	spp-13		SaPosin-like Protein family	F08F1.6	WBGene00004998
	Q9N5S7	13	Q9N5S7	0.0524012	-0.146655	0.251458	30.1391	0.569017	0.799535	mir-1(gk276) / N2	txdc-12.2		ThioredoXin Domain Containing protein homolog	F49H12.5	WBGene00018656
	Q9N357	2	Q9N357	-0.473303	-2.28025	1.33365	25.4292	0.570913	0.801538	mir-1(gk276) / N2			Uncharacterized protein	Y55F3AR.2	WBGene00021933
	Q9UB28;Q9UB29;H2L0C1;Q9BKP3	81;66;10;8	Q9UB28	0.0501114	-0.142672	0.242895	31.0571	0.573804	0.804561	mir-1(gk276) / N2	let-805		Myotactin form B	H19M22.2	WBGene00002915
	Q17339	11	Q17339	-0.0942002	-0.456797	0.268396	26.9361	0.574011	0.804561	mir-1(gk276) / N2	gld-1		Female germline-specific tumor suppressor gld-1	T23G11.3	WBGene00001595
	O44622	5	O44622	-0.0869456	-0.422809	0.248918	26.1613	0.575347	0.805424	mir-1(gk276) / N2			Uncharacterized protein	K11D12.7	WBGene00019647
	G5EFP2;G5EDL9	8;7	G5EFP2	0.0451424	-0.129405	0.21969	28.894	0.575705	0.805424	mir-1(gk276) / N2			Uncharacterized protein	ZK1321.4	WBGene00014262
	V6CJ04	11	V6CJ04	-0.0745076	-0.362922	0.213907	26.3391	0.576127	0.805424	mir-1(gk276) / N2	bicd-1		Protein bicaudal D homolog	C43G2.2	WBGene00016611
	Q5DX36	3	Q5DX36	-0.0843651	-0.411685	0.242955	25.962	0.576985	0.805424	mir-1(gk276) / N2			Uncharacterized protein	C33F10.14	WBGene00050941
	Q21285	8	Q21285	-0.122448	-0.597534	0.352637	26.3133	0.576992	0.805424	mir-1(gk276) / N2	dao-3		Dauer or Aging adult Overexpression	K07E3.3	WBGene00000929
	Q20626;Q565D2;Q565D1;O45541;Q6BEV6;O45544;Q20625;D0VWM5;O45542;O45543;Q8I4I3	55;53;53;50;48;47;47;38;29;29;26	Q20626	-0.0659156	-0.32225	0.190419	31.0836	0.577854	0.805514	mir-1(gk276) / N2			Uncharacterized protein	F49E2.5	WBGene00009888
	Q93619	8	Q93619	-0.0789625	-0.386156	0.228231	26.9791	0.578003	0.805514	mir-1(gk276) / N2	bckd-1b	bckd-1B tag-173	Branched Chain Keto acid Dehydrogenase e1 (E1) subunit	F27D4.5	WBGene00006518
	Q8MQG6	2	Q8MQG6	-0.315179	-1.54933	0.91897	24.9182	0.580424	0.807848	mir-1(gk276) / N2			Uncharacterized protein	W02D3.12	WBGene00020937
	O62146	15	O62146	-0.0519165	-0.255316	0.151483	29.2119	0.580626	0.807848	mir-1(gk276) / N2			Putative phospholipase B-like 2	F09B12.3	WBGene00008607
	Q18200	8	Q18200	-0.0765352	-0.376795	0.223724	27.9918	0.581131	0.807891	mir-1(gk276) / N2			Uncharacterized protein	C26B9.3	WBGene00016133
	Q17561	8	Q17561	0.129129	-0.379712	0.63797	27.3439	0.582776	0.808174	mir-1(gk276) / N2	aly-1		Ref/ALY RNA export adaptor family	C01F6.5	WBGene00000120
	Q95XM9	9	Q95XM9	0.0920469	-0.270867	0.45496	27.4141	0.582977	0.808174	mir-1(gk276) / N2	ddx-27		DEAD boX helicase homolog	Y71G12B.8	WBGene00022148
	Q9N4Y8	26	Q9N4Y8	-0.0495555	-0.245446	0.146335	29.5148	0.583939	0.808174	mir-1(gk276) / N2	nuo-5		NADH Ubiquinone Oxidoreductase	Y45G12B.1	WBGene00021562
	O01805	11	O01805	-0.0549355	-0.272183	0.162312	31.9191	0.584092	0.808174	mir-1(gk276) / N2	acbp-1		Acyl-CoA-binding protein homolog 1	C44E4.6	WBGene00016655
	G5ECC1;B2D6L9;G5ECM7	4;3;3	G5ECC1	0.0811455	-0.240413	0.402704	27.3477	0.584853	0.808174	mir-1(gk276) / N2			Uncharacterized protein	F13G3.10	WBGene00008768
	Q8MXR2;V6CLR1	7;4	Q8MXR2	-0.351941	-1.74736	1.04348	26.3643	0.585056	0.808174	mir-1(gk276) / N2	hrpf-2		HnRNP F homolog	Y73B6BL.33	WBGene00022253
	O62432	3	O62432	0.300852	-0.893189	1.49489	25.7697	0.585424	0.808174	mir-1(gk276) / N2	dpy-4		DumPY: shorter than wild-type	Y41E3.2	WBGene00001066
	Q9XWK2	6	Q9XWK2	0.0629677	-0.187175	0.31311	28.2151	0.585766	0.808174	mir-1(gk276) / N2			Uncharacterized protein	Y54E5A.5	WBGene00013200
	G5EDF5	6	G5EDF5	-0.0680555	-0.338981	0.20287	26.8086	0.586544	0.808174	mir-1(gk276) / N2	tufm-2		Mitochondrial elongation factor Tu homologue	C43E11.4	WBGene00007001
	O44441	16	O44441	-0.0774827	-0.386224	0.231259	32.4714	0.586887	0.808174	mir-1(gk276) / N2	mai-2		ATPase inhibitor mai-2, mitochondrial	B0546.1	WBGene00015248
	Q93572	40	Q93572	-0.058822	-0.293222	0.175578	33.1335	0.586911	0.808174	mir-1(gk276) / N2	rla-0	rpa-0	60S acidic ribosomal protein P0	F25H2.10	WBGene00004408
	A0A061ACL3;Q965I6;O76618	15;14;14	A0A061ACL3	-0.10739	-0.535468	0.320688	28.2965	0.587029	0.808174	mir-1(gk276) / N2	cars-1		Cysteinyl Amino-acyl tRNA Synthetase	Y23H5A.7	WBGene00000800
	P49596	7	P49596	0.0690825	-0.208252	0.346417	28.0423	0.58963	0.810779	mir-1(gk276) / N2	ppm-2		Probable protein phosphatase 2C T23F11.1	T23F11.1	WBGene00011953
	P52874;Q2EEP3	2;1	P52874	0.178642	-0.539001	0.896286	23.775	0.589874	0.810779	mir-1(gk276) / N2	clpf-1		Protein clpf-1	F59A2.4	WBGene00010304
	Q9N3D9	12	Q9N3D9	-0.0728856	-0.366353	0.220582	29.3468	0.590712	0.811276	mir-1(gk276) / N2	nduf-5		NADH Ubiquinone oxidoreductase Fe-S protein	Y54E10BL.5	WBGene00021839
	Q9N4J7;A4F325	4;1	Q9N4J7	0.236536	-0.721834	1.19491	24.0791	0.592995	0.813755	mir-1(gk276) / N2			Uncharacterized protein	F54A3.2	WBGene00018781
	O76258	6	O76258	0.0988038	-0.302446	0.500054	26.5742	0.593836	0.813767	mir-1(gk276) / N2	tsg-101		Tumor Susceptibility Gene homolog	C09G12.9	WBGene00015658
	Q9TXZ7	7	Q9TXZ7	-0.0885052	-0.448134	0.271124	28.3722	0.594041	0.813767	mir-1(gk276) / N2			Uncharacterized protein	H23N18.5	WBGene00019236
	V6CLC9;Q9N303	2;2	Q9N303	-0.223012	-1.13072	0.684698	25.7015	0.594653	0.813767	mir-1(gk276) / N2	deps-1		Uncharacterized protein	Y65B4BL.2	WBGene00022034
	Q20964;O61518	7;1	Q20964	-0.0843965	-0.428157	0.259364	28.5112	0.594915	0.813767	mir-1(gk276) / N2	lys-4		LYSozyme	F58B3.1	WBGene00003093
	P91250	5	P91250	-0.0741036	-0.377787	0.22958	30.6639	0.597124	0.814982	mir-1(gk276) / N2	col-73		COLlagen	F11G11.12	WBGene00000649
	Q9TYL9	8	Q9TYL9	-0.222986	-1.13703	0.691056	26.0088	0.597212	0.814982	mir-1(gk276) / N2	copb-1		Coatomer subunit beta	Y25C1A.5	WBGene00021292
	O62122	2	O62122	-0.421213	-2.14793	1.30551	25.5616	0.597239	0.814982	mir-1(gk276) / N2	gcsh-1		Glycine cleavage system H protein	D1025.2	WBGene00008354
	P50140;G8JYF5;V6CLG8	68;46;24	P50140	-0.0389719	-0.199167	0.121223	34.7175	0.598218	0.815664	mir-1(gk276) / N2	hsp-60	hsp60	Chaperonin homolog Hsp-60, mitochondrial	Y22D7AL.5	WBGene00002025
	Q9BL48	3	Q9BL48	0.122204	-0.380803	0.625211	24.3654	0.598708	0.81568	mir-1(gk276) / N2	set-27		SET (Trithorax/polycomb) domain containing	Y71H2AM.8	WBGene00022173
	O45346	6	O45346	-0.0747213	-0.383269	0.233826	27.8182	0.599859	0.816313	mir-1(gk276) / N2	osm-11		Uncharacterized protein	F11C7.5	WBGene00003891
	Q9BL33	6	Q9BL33	0.381261	-1.19428	1.9568	25.2124	0.600131	0.816313	mir-1(gk276) / N2			Uncharacterized protein	Y71H2AM.4	WBGene00022169
	G5EF37	3	G5EF37	-0.12318	-0.633855	0.387495	27.6552	0.601286	0.816579	mir-1(gk276) / N2	pat-10	tnc-1	Paralysed Arrest at Two-fold	F54C1.7	WBGene00003934
	O45319	12	O45319	-0.0470848	-0.242458	0.148288	28.9934	0.601598	0.816579	mir-1(gk276) / N2	tin-13	tim-13	Mitochondrial import inner membrane translocase subunit tim-13	DY3.1	WBGene00006574
	Q9N2Z3;H2L083;V6CM29	3;3;2	Q9N2Z3	-0.098345	-0.506607	0.309917	27.6649	0.601766	0.816579	mir-1(gk276) / N2	grl-16		GRound-Like (Grd related)	Y65B4BR.6	WBGene00001725
	Q304E5;Q9TZQ3	8;8	Q9TZQ3	-0.10514	-0.542231	0.331952	28.1928	0.602276	0.816621	mir-1(gk276) / N2	pgl-1		Guanyl-specific ribonuclease pgl-1	ZK381.4	WBGene00003992
	Q20117	7	Q20117	-0.546788	-2.82914	1.73556	25.9843	0.603722	0.81719	mir-1(gk276) / N2	gcs-1		Glutamate--cysteine ligase	F37B12.2	WBGene00001527
	O61955	3	O61955	-0.0918342	-0.475272	0.291603	26.984	0.603825	0.81719	mir-1(gk276) / N2	ife-3		Eukaryotic translation initiation factor 4E-3	B0348.6	WBGene00002061
	Q9N5B7;A0A2C9C3S7;G5ECC3;Q86S80;G5EEU7;Q8WSP1;A0A2C9C3Z4;A0A2C9C352;G5EFP1	15;14;14;13;13;13;13;12;12	Q9N5B7	-0.0582642	-0.301747	0.185219	27.8945	0.604135	0.81719	mir-1(gk276) / N2	rme-1		Receptor Mediated Endocytosis	W06H8.1	WBGene00004373
	Q9TXU7	10	Q9TXU7	0.0670953	-0.214486	0.348677	29.8992	0.605647	0.818585	mir-1(gk276) / N2	eif-1.a	eif-1.A	Eukaryotic Initiation Factor	H06H21.3	WBGene00019162
	Q19324	6	Q19324	-0.323585	-1.68368	1.03651	24.6966	0.606194	0.818674	mir-1(gk276) / N2	rpn-5		Proteasome Regulatory Particle, Non-ATPase-like	F10G7.8	WBGene00004461
	Q9XWP7	16	Q9XWP7	0.0436681	-0.140897	0.228233	30.3081	0.608156	0.820451	mir-1(gk276) / N2	eif-3.j	eif-3.J	Eukaryotic Initiation Factor	Y40B1B.5	WBGene00012738
	Q8MNU7	2	Q8MNU7	0.23323	-0.754511	1.22097	24.6402	0.608866	0.820451	mir-1(gk276) / N2			COX assembly mitochondrial protein 2 homolog	C35D10.17	WBGene00016452
	O02267	10	O02267	0.0634946	-0.205476	0.332465	29.9002	0.608955	0.820451	mir-1(gk276) / N2			Uncharacterized protein	F45H10.3	WBGene00009740
	Q9BKU5;Q9BKU6	25;21	Q9BKU5	0.085224	-0.277627	0.448075	34.3406	0.610739	0.821948	mir-1(gk276) / N2			Uncharacterized protein	Y37E3.8	WBGene00021350
	Q18453	4	Q18453	0.249021	-0.812095	1.31014	25.1168	0.611031	0.821948	mir-1(gk276) / N2	rsd-3		Uncharacterized protein	C34E11.1	WBGene00004682
	O62183	4	O62183	-0.139546	-0.739319	0.460227	24.8562	0.614052	0.82497	mir-1(gk276) / N2	aly-2		Ref/ALY RNA export adaptor family	F23B2.6	WBGene00000121
	Q9U315;Q9XU17	4;2	Q9U315	-0.188587	-1.00017	0.622994	26.1691	0.614495	0.82497	mir-1(gk276) / N2			Uncharacterized protein	Y105C5B.5	WBGene00013647
	Q19626	20	Q19626	-0.0522152	-0.277074	0.172644	31.5051	0.614731	0.82497	mir-1(gk276) / N2	vha-12		Probable V-type proton ATPase subunit B	F20B6.2	WBGene00006921
	O61791	4	O61791	0.0819495	-0.271827	0.435726	26.5803	0.61559	0.825282	mir-1(gk276) / N2	mrps-6		Mitochondrial Ribosomal Protein, Small	R12E2.12	WBGene00020037
	O61708	14	O61708	-0.0497972	-0.265056	0.165461	29.7625	0.616048	0.825282	mir-1(gk276) / N2	pqn-59		Prion-like-(Q/N-rich)-domain-bearing protein	R119.4	WBGene00004143
	P34662	18	P34662	0.113099	-0.376311	0.602509	34.0325	0.616417	0.825282	mir-1(gk276) / N2	rpl-35		60S ribosomal protein L35	ZK652.4	WBGene00004449
	P47209;Q8WQG4	28;18	P47209	-0.0579017	-0.309742	0.193939	30.3068	0.618191	0.826964	mir-1(gk276) / N2	cct-5		T-complex protein 1 subunit epsilon	C07G2.3	WBGene00000380
	G5EEM5	7	G5EEM5	0.0353155	-0.118489	0.18912	26.8919	0.618645	0.826964	mir-1(gk276) / N2	zyg-9		Zygote defective protein 9	F22B5.7	WBGene00006994
	Q93565	3	Q93565	-0.180315	-0.967709	0.607079	25.5453	0.619566	0.827546	mir-1(gk276) / N2	tli-1		ToLlIp homolog	F25H2.1	WBGene00006578
	Q23450	4	Q23450	0.0558429	-0.188558	0.300244	25.6398	0.620341	0.8278	mir-1(gk276) / N2	coa-7		Cytochrome c oxidase assembly factor 7 homolog	ZK20.4	WBGene00013925
	Q9NAG4	4	Q9NAG4	0.0756799	-0.255912	0.407271	26.0091	0.620728	0.8278	mir-1(gk276) / N2	mac-1		Protein mac-1	Y48C3A.7	WBGene00003119
	O76449	13	O76449	0.0444859	-0.15102	0.239992	28.4581	0.621771	0.828042	mir-1(gk276) / N2			Uncharacterized protein	ZK1055.7	WBGene00022848
	Q23202	6	Q23202	0.06132	-0.208442	0.331082	27.3315	0.622121	0.828042	mir-1(gk276) / N2	sbds-1		Ribosome maturation protein SBDS	W06E11.4	WBGene00021063
	P02566	279	P02566	0.0445368	-0.151572	0.240645	36.7147	0.622435	0.828042	mir-1(gk276) / N2	unc-54	myo-4	Myosin-4	F11C3.3	WBGene00006789
	Q17949	9	Q17949	0.0709802	-0.241948	0.383908	26.8945	0.622855	0.828042	mir-1(gk276) / N2	dohh-1	tag-242	Deoxyhypusine hydroxylase	C14A4.1	WBGene00007555
	G5ED07	48	G5ED07	0.0523975	-0.179515	0.28431	33.2899	0.6242	0.82854	mir-1(gk276) / N2	pdi-3		Protein disulfide-isomerase	H06O01.1	WBGene00003964
	P45971	3	P45971	-0.491234	-2.66801	1.68555	25.6262	0.624604	0.82854	mir-1(gk276) / N2	ostb-1		Dolichyl-diphosphooligosaccharide--protein glycosyltransferase 48 kDa subunit	T09A5.11	WBGene00011638
	Q20877	14	Q20877	0.0593775	-0.203804	0.322559	28.8392	0.624689	0.82854	mir-1(gk276) / N2			Uncharacterized protein	F56D3.1	WBGene00018969
	O44503;U4PFH6	12;12	O44503	-0.0708105	-0.385503	0.243882	27.6268	0.625598	0.828636	mir-1(gk276) / N2	aass-1		AminoAdipate-Semialdehyde Synthase homolog	R02D3.1	WBGene00019819
	V6CLC8;Q8MQF7;H2KYC9	3;3;3	Q8MQF7	-0.105349	-0.574187	0.36349	25.128	0.626073	0.828636	mir-1(gk276) / N2			Uncharacterized protein	C01B10.6	WBGene00015280
	O61793	11	O61793	0.0493618	-0.170497	0.269221	29.5352	0.626355	0.828636	mir-1(gk276) / N2			Uncharacterized protein	R12E2.13	WBGene00020038
	C9IY22;C9IY21	6;6	C9IY21	0.0539046	-0.186909	0.294718	27.208	0.627376	0.828636	mir-1(gk276) / N2			Uncharacterized protein	ZK1058.9	WBGene00014207
	Q9N3T5	5	Q9N3T5	0.180305	-0.62585	0.986459	25.2905	0.627654	0.828636	mir-1(gk276) / N2	spg-7		AFG3-like protein spg-7	Y47G6A.10	WBGene00004978
	O45148	13	O45148	-0.0371385	-0.2032	0.128924	30.75	0.627681	0.828636	mir-1(gk276) / N2	dlst-1		DihydroLipoamide S-SuccinylTransferase	W02F12.5	WBGene00020950
	P34504	10	P34504	-0.0653347	-0.358319	0.227649	28.5178	0.628661	0.829287	mir-1(gk276) / N2			Uncharacterized protein K04H4.2	K04H4.2	WBGene00010573
	Q965K5	5	Q965K5	-0.138191	-0.760985	0.484602	25.5766	0.630346	0.829566	mir-1(gk276) / N2	dnc-3		DyNactin Complex component	W10G11.20	WBGene00021149
	O17833;G5EEA4;G5EDJ5;G5EF39;A0A0K3ATK8;A0A0K3AQM0;A0A0K3AQP4;Q3S1I9;G5ECN3	3;3;3;3;3;3;2;2;1	O17833	-0.116004	-0.638838	0.406831	24.7605	0.630369	0.829566	mir-1(gk276) / N2	lim-9		LIM domain family	F25H5.1	WBGene00006407
	Q9N4P9	4	Q9N4P9	-0.20794	-1.14554	0.729658	26.0184	0.630513	0.829566	mir-1(gk276) / N2	exos-4.2		EXOSome (Multiexonuclease complex) component	Y6D11A.1	WBGene00000202
	P91913	5	P91913	-0.0713126	-0.393153	0.250528	32.9098	0.630821	0.829566	mir-1(gk276) / N2	rla-1	rpa-1	60S acidic ribosomal protein P1	Y37E3.7	WBGene00004409
	P91856	3	P91856	-0.138911	-0.7694	0.491578	25.7401	0.632734	0.831029	mir-1(gk276) / N2			Probable phosphoserine aminotransferase	F26H9.5	WBGene00009177
	Q9N3B0	13	Q9N3B0	-0.0602959	-0.334172	0.213581	29.7547	0.632985	0.831029	mir-1(gk276) / N2	manf-1		Mesencephalic astrocyte-derived neurotrophic factor homolog	Y54G2A.23	WBGene00021888
	A8WHP8	5	A8WHP8	-0.0410794	-0.228688	0.146529	27.4704	0.634808	0.831029	mir-1(gk276) / N2	plin-1	mdt-28	Perilipin-1 homolog	W01A8.1	WBGene00007024
	Q9N3F0	9	Q9N3F0	0.0476391	-0.170213	0.265491	27.4711	0.635245	0.831029	mir-1(gk276) / N2			Ribosome production factor 2 homolog	Y54E10A.10	WBGene00021830
	Q21888	13	Q21888	-0.0569338	-0.317474	0.203606	29.2319	0.635482	0.831029	mir-1(gk276) / N2			Uncharacterized protein	R102.2	WBGene00011289
	Q95QL3	4	Q95QL3	0.106426	-0.380703	0.593555	25.0883	0.635552	0.831029	mir-1(gk276) / N2	rbm-34		RNA Binding Motif protein homolog	F11A10.7	WBGene00008688
	O45011;O01854	27;21	O45011	0.0567541	-0.203072	0.316581	30.6308	0.635621	0.831029	mir-1(gk276) / N2			Uncharacterized protein	W10C8.5	WBGene00021128
	Q9XVJ3	4	Q9XVJ3	-0.0852138	-0.475585	0.305157	26.8186	0.635837	0.831029	mir-1(gk276) / N2	qdpr-1		Quinoid DihydroPteridine Reductase	T03F6.1	WBGene00011398
	Q9XVE9	28	Q9XVE9	-0.0588429	-0.328955	0.211269	32.4826	0.636515	0.831277	mir-1(gk276) / N2	rpl-14		Ribosomal Protein, Large subunit	C04F12.4	WBGene00004426
	Q8MNU8	6	Q8MNU8	-0.0527475	-0.296225	0.19073	27.0901	0.638358	0.833045	mir-1(gk276) / N2			Protein FMC1 homolog	C29E4.12	WBGene00016209
	O61792	8	O61792	0.0539377	-0.195793	0.303669	29.1071	0.639367	0.833078	mir-1(gk276) / N2	rpn-8		Proteasome Regulatory Particle, Non-ATPase-like	R12E2.3	WBGene00004464
	Q21531;B5BM23;Q7JMF0;B5BM24	31;29;29;22	Q21531	0.044686	-0.162484	0.251856	30.4056	0.639807	0.833078	mir-1(gk276) / N2	ifg-1		Initiation Factor 4G (eIF4G) family	M110.4	WBGene00002066
	O01513	3	O01513	0.424188	-1.54267	2.39105	24.503	0.639851	0.833078	mir-1(gk276) / N2			Putative 40S ribosomal protein S4-like	C48B6.2	WBGene00016740
	O44951	4	O44951	0.496734	-1.81102	2.80448	24.9912	0.640498	0.833233	mir-1(gk276) / N2	ttc-1		TeTratriCopeptide repeat domain protein related	C34B2.5	WBGene00016390
	Q9U3F8;Q20239	3;3	Q20239	0.174943	-0.640654	0.99054	24.3621	0.641647	0.833233	mir-1(gk276) / N2	aagr-3		Acid Alpha Glucosidase Relate	F40F9.6	WBGene00009583
	H2KZ22;Q8WT46	4;4	Q8WT46	-0.259658	-1.47093	0.951619	23.6109	0.641847	0.833233	mir-1(gk276) / N2	wip-1		Wiskott-Aldrich syndrome protein (WASP)-Interacting Protein and gene assignment	R144.4	WBGene00020094
	Q9BKS1	4	Q9BKS1	0.0445836	-0.163445	0.252612	26.0969	0.641927	0.833233	mir-1(gk276) / N2	elc-1		ELongin C	Y82E9BR.15	WBGene00001236
	Q9NAE2	2	Q9NAE2	-0.41602	-2.36785	1.53581	25.3626	0.643727	0.833336	mir-1(gk276) / N2			Probable urocanate hydratase	Y51H4A.7	WBGene00013103
	G5ECR7	7	G5ECR7	0.077085	-0.284838	0.439008	27.0947	0.643967	0.833336	mir-1(gk276) / N2	elb-1	3L686	ELongin B	Y41C4A.10	WBGene00001235
	P90915	5	P90915	-0.0711538	-0.406762	0.264455	27.2025	0.645465	0.833336	mir-1(gk276) / N2			Uncharacterized protein	K07A1.10	WBGene00010616
	Q93615	29	Q93615	-0.0446307	-0.255334	0.166073	32.1849	0.645768	0.833336	mir-1(gk276) / N2			Probable electron transfer flavoprotein subunit alpha, mitochondrial	F27D4.1	WBGene00009187
	Q22631	9	Q22631	0.0754663	-0.281334	0.432266	28.5216	0.646243	0.833336	mir-1(gk276) / N2			Uncharacterized protein	T21B6.3	WBGene00011880
	Q9GZH2	7	Q9GZH2	-0.0976871	-0.559629	0.364255	25.7146	0.646303	0.833336	mir-1(gk276) / N2	ruvb-2		RuvB-like 2	T22D1.10	WBGene00020687
	Q95Y04	19	Q95Y04	0.0472101	-0.176176	0.270596	33.665	0.646506	0.833336	mir-1(gk276) / N2	rps-28		40S ribosomal protein S28	Y41D4B.5	WBGene00004497
	Q23635	3	Q23635	-0.122549	-0.704511	0.459412	28.3562	0.647676	0.833336	mir-1(gk276) / N2			Uncharacterized protein	ZK84.1	WBGene00022649
	Q9TXI4;A0A061AJJ5	26;3	Q9TXI4	0.055476	-0.20825	0.319202	32.0032	0.648022	0.833336	mir-1(gk276) / N2			Uncharacterized protein	F23C8.5	WBGene00017734
	H2L023;Q95YA9	10;9	H2L023	-0.0781336	-0.450414	0.294146	28.4495	0.648758	0.833336	mir-1(gk276) / N2	cas-1		Adenylyl cyclase-associated protein	F41G4.2	WBGene00000294
	Q9TW45;A0A2C9C376	8;6	Q9TW45	-0.185504	-1.07047	0.699463	26.6506	0.649161	0.833336	mir-1(gk276) / N2	par-1		Serine/threonine-protein kinase par-1	H39E23.1	WBGene00003916
	Q19104;I2HAE5	4;4	Q19104	-0.337602	-1.94892	1.27371	24.8727	0.649312	0.833336	mir-1(gk276) / N2			Uncharacterized protein	F01G4.4	WBGene00008503
	O01314	4	O01314	-0.084818	-0.489775	0.320139	25.2387	0.64942	0.833336	mir-1(gk276) / N2			Uncharacterized protein	F02E9.1	WBGene00008528
	O17680	37	O17680	-0.0570107	-0.329263	0.215241	33.4879	0.64949	0.833336	mir-1(gk276) / N2	sams-1		Probable S-adenosylmethionine synthase 1	C49F5.1	WBGene00008205
	Q09545	15	Q09545	-0.0350785	-0.202905	0.132748	29.8271	0.65009	0.833336	mir-1(gk276) / N2	sdhb-1	tag-55	Succinate dehydrogenase [ubiquinone] iron-sulfur subunit, mitochondrial	F42A8.2	WBGene00006433
	Q9N4U1	5	Q9N4U1	-0.124014	-0.717685	0.469656	25.6451	0.650278	0.833336	mir-1(gk276) / N2			Uncharacterized protein	Y49F6B.2	WBGene00021715
	Q09511	8	Q09511	0.0522577	-0.197942	0.302458	28.1823	0.650325	0.833336	mir-1(gk276) / N2	rsp-4	srp-2	Probable splicing factor, arginine/serine-rich 4	EEED8.7	WBGene00004701
	Q6A8K1;P10986;P10984;P0DM42;P0DM41;Q95ZL1	35;35;35;35;35;29	P10984	-0.0470299	-0.273231	0.179172	35.6363	0.651797	0.834358	mir-1(gk276) / N2	act-2		Actin-2	T04C12.5	WBGene00000064
	O62325	6	O62325	0.0511374	-0.195067	0.297341	25.8425	0.652119	0.834358	mir-1(gk276) / N2	rbm-28		RNA Binding Motif protein homolog	R05H10.2	WBGene00011043
	Q9XUT0	8	Q9XUT0	0.0493674	-0.189243	0.287978	27.0794	0.65337	0.834358	mir-1(gk276) / N2	dbn-1		DreBriN 1/DreBriN-like (Where Drebrin is from Developmentally REgulated BRaIN protein) family homolog	K08E3.4	WBGene00010664
	O62277	9	O62277	-0.051515	-0.30052	0.19749	29.7009	0.653388	0.834358	mir-1(gk276) / N2	dct-18		DAF-16/FOXO Controlled, germline Tumor affecting	F58G1.4	WBGene00010266
	Q20813;Q8IG15;Q95ZS6;Q8IG14	2;2;2;1	Q20813	0.288756	-1.11073	1.68824	24.609	0.654246	0.834358	mir-1(gk276) / N2	rfip-1		Rab-11 Family Interacting-Protein	F55C12.1	WBGene00018869
	P12845	149	P12845	-0.0371679	-0.217334	0.142998	33.122	0.654295	0.834358	mir-1(gk276) / N2	myo-2		Myosin-2	T18D3.4	WBGene00003514
	Q03565	3	Q03565	0.361981	-1.39571	2.11967	26.1487	0.654849	0.834358	mir-1(gk276) / N2	baf-1		Barrier-to-autointegration factor 1	B0464.7	WBGene00000235
	Q9U302;Q7K798;Q7K797	42;41;37	Q9U302	-0.0295909	-0.173481	0.114299	33.3007	0.655302	0.834358	mir-1(gk276) / N2	pab-1		Polyadenylate-binding protein	Y106G6H.2	WBGene00003902
	Q18823	30	Q18823	0.0521587	-0.201655	0.305972	29.7115	0.655532	0.834358	mir-1(gk276) / N2	lam-2		Laminin-like protein lam-2	C54D1.5	WBGene00016913
	P34382	17	P34382	-0.0729976	-0.428926	0.28293	31.1367	0.656168	0.834543	mir-1(gk276) / N2	far-1		Fatty-acid and retinol-binding protein 1	F02A9.2	WBGene00001385
	Q17624	4	Q17624	-0.282887	-1.67272	1.10694	25.9987	0.658575	0.835961	mir-1(gk276) / N2	arrd-25		ARRestin Domain protein	C04C11.2	WBGene00007296
	G5EDZ9	4	G5EDZ9	0.0838583	-0.328869	0.496586	27.2296	0.659135	0.835961	mir-1(gk276) / N2	cpi-1		Cystatin	K08B4.6	WBGene00000535
	P41938	8	P41938	0.0407671	-0.159989	0.241523	27.9878	0.65931	0.835961	mir-1(gk276) / N2			Probable 3-hydroxyacyl-CoA dehydrogenase B0272.3	B0272.3	WBGene00007129
	O17352	7	O17352	-0.0496598	-0.294212	0.194893	27.7007	0.659317	0.835961	mir-1(gk276) / N2	aagr-4		Acid Alpha Glucosidase Relate	F52D1.1	WBGene00018682
	G3MU66;O02266	5;5	O02266	0.291263	-1.14499	1.72752	24.3949	0.659737	0.835961	mir-1(gk276) / N2	alh-7		ALdehyde deHydrogenase	F45H10.1	WBGene00000113
	O01576	4	O01576	0.0587283	-0.232245	0.349701	26.2107	0.661231	0.836879	mir-1(gk276) / N2	npp-11		Nuclear Pore complex Protein	F53F10.5	WBGene00003797
	Q27876;Q27484	13;13	Q27484	0.103923	-0.411319	0.619164	33.0219	0.661444	0.836879	mir-1(gk276) / N2	his-41		Probable histone H2B 3	C50F4.5	WBGene00001915
	Q9U228	3	Q9U228	-0.296274	-1.77164	1.17909	23.4845	0.662821	0.837998	mir-1(gk276) / N2	mif-1		MIF (Macrophage migration Inhibitory Factor) related	Y56A3A.3	WBGene00003234
	P34574	6	P34574	0.274383	-1.09484	1.64361	25.3694	0.663477	0.838044	mir-1(gk276) / N2	chc-1		Probable clathrin heavy chain 1	T20G5.1	WBGene00011867
	G5ED31;G5EDD1	11;11	G5ED31	-0.104855	-0.628714	0.419003	28.533	0.663841	0.838044	mir-1(gk276) / N2	ucr-2.1		Ubiquinol-Cytochrome c oxidoReductase complex	VW06B3R.1	WBGene00012158
	Q95XP6;Q8MXS0;B7CED8	11;9;9	Q95XP6	-0.161896	-0.975877	0.652085	24.7531	0.665817	0.839494	mir-1(gk276) / N2	mca-3		Calcium-transporting ATPase	Y67D8C.10	WBGene00003153
	Q20011	8	Q20011	-0.0865866	-0.52239	0.349217	29.1442	0.666147	0.839494	mir-1(gk276) / N2	nlp-24		Neuropeptide-Like Protein	F35B12.7	WBGene00003762
	O44156	4	O44156	0.0300873	-0.121724	0.181899	27.3755	0.666919	0.839494	mir-1(gk276) / N2	pas-6		Proteasome subunit alpha type-1	CD4.6	WBGene00003927
	A3QMC5	25	A3QMC5	-0.0956307	-0.57822	0.386958	33.2292	0.666962	0.839494	mir-1(gk276) / N2	rpl-34		Ribosomal Protein, Large subunit	C42C1.14	WBGene00004448
	Q22038	9	Q22038	-0.0332489	-0.201512	0.135015	29.6978	0.66784	0.839953	mir-1(gk276) / N2	rho-1	rhoa	Ras-like GTP-binding protein rhoA	Y51H4A.3	WBGene00004357
	G5EF97	4	G5EF97	-0.203403	-1.23434	0.827538	26.0051	0.668313	0.839953	mir-1(gk276) / N2	sfa-1	sf1	SF1 protein	Y116A8C.32	WBGene00013808
	P52018	3	P52018	0.0709067	-0.2899	0.431714	26.723	0.669527	0.840859	mir-1(gk276) / N2	cyn-11	cyp-11	Peptidyl-prolyl cis-trans isomerase 11	T01B7.4	WBGene00000887
	Q22623	8	Q22623	0.0498596	-0.204401	0.30412	27.1949	0.670195	0.841077	mir-1(gk276) / N2	mrpl-50		Mitochondrial Ribosomal Protein, Large	T21B10.1	WBGene00011883
	Q23338	5	Q23338	0.0689239	-0.2836	0.421448	26.1113	0.671106	0.8416	mir-1(gk276) / N2	fkb-4		Peptidylprolyl isomerase	ZC455.10	WBGene00001429
	Q20683	7	Q20683	0.0555493	-0.230727	0.341826	26.2889	0.67342	0.843017	mir-1(gk276) / N2	ttc-36		Tetratricopeptide repeat protein 36	F52H3.5	WBGene00009947
	Q5F4U0	4	Q5F4U0	-0.220112	-1.35455	0.914328	25.5379	0.673442	0.843017	mir-1(gk276) / N2	cdh-10		CaDHerin family	C45G7.5	WBGene00000402
	Q86NH9	3	Q86NH9	0.320583	-1.33319	1.97435	26.5696	0.673721	0.843017	mir-1(gk276) / N2	ttr-41		TransThyretin-Related family domain	F10G7.11	WBGene00017374
	E1B6R3;P34445;E1B6R4;D1MN62;E1B6R5	5;5;4;4;3	P34445	-0.11358	-0.703573	0.476412	25.0795	0.675824	0.845028	mir-1(gk276) / N2			Uncharacterized protein F54C8.7	F54C8.7	WBGene00010040
	O61862;H2KZB7;H2KZB6	6;6;5	O61862	-0.199689	-1.23902	0.839638	26.2942	0.676419	0.845152	mir-1(gk276) / N2			Uncharacterized protein	M01B12.4	WBGene00019697
	Q8MXS2;P90978;Q9BKR8	12;12;2	P90978	0.0426256	-0.180169	0.265421	28.2998	0.677696	0.846126	mir-1(gk276) / N2	uaf-1		Splicing factor U2AF 65 kDa subunit	Y92C3B.2	WBGene00006697
	Q9NA32	2	Q9NA32	-0.291259	-1.81845	1.23593	25.4683	0.678652	0.846699	mir-1(gk276) / N2			Uncharacterized protein	Y73F8A.27	WBGene00013532
	Q95XX0	3	Q95XX0	-0.0411473	-0.258201	0.175906	25.6831	0.680454	0.848326	mir-1(gk276) / N2	ubc-13		Ubiquitin-conjugating enzyme E2 13	Y54G2A.31	WBGene00006708
	G5EGH7	2	G5EGH7	0.0472658	-0.202561	0.297093	26.9682	0.681051	0.84844	mir-1(gk276) / N2	lon-8		Protein lon-8	Y59A8B.20	WBGene00013352
	Q21152	2	Q21152	-0.160434	-1.00982	0.688949	24.3849	0.681542	0.84844	mir-1(gk276) / N2	far-8		Fatty Acid/Retinol binding protein	K02F3.3	WBGene00001392
	P30629	9	P30629	0.0425233	-0.184231	0.269277	28.1606	0.683679	0.849948	mir-1(gk276) / N2			Uncharacterized protein ZK637.2	ZK637.2	WBGene00014022
	Q9N4L8	12	Q9N4L8	0.0285492	-0.123847	0.180946	30.0102	0.683989	0.849948	mir-1(gk276) / N2	lpd-5		LiPid Depleted	ZK973.10	WBGene00003061
	Q9N408	9	Q9N408	-0.0335705	-0.212929	0.145788	29.9775	0.68425	0.849948	mir-1(gk276) / N2	ddp-1	tim-8	Mitochondrial import inner membrane translocase subunit Tim8	Y39A3CR.4	WBGene00000941
	O02642	25	O02642	0.0575829	-0.25147	0.366636	30.3803	0.685594	0.850996	mir-1(gk276) / N2	sucl-2		Succinate--CoA ligase [ADP/GDP-forming] subunit alpha, mitochondrial	F23H11.3	WBGene00017759
	O16962;J7SF88;Q18391;Q9XU11;O62496;Q966B8;Q18394;Q18393;Q18395;G5EEH2;Q18392;O62031;O62034;H2L0L6;Q95QB3;Q2V068;Q21700;G5EEL3;O16663;O16398;O16960;H2L0M9;O45910;Q7YXC6;O17131;Q20097;Q18155;O16676;O16968;H2L098;G5EFN9;A0A0K3AVA9;O44593;Q9NEV6;H2L019;H2L018;A0A131MCX9;Q966H9;Q966A2;L8E924;G5EDC3;G5ED47;Q9XVJ1;O45905;A0A0K3AV12;O45756;Q8MXK0;Q20389;O62412;O45315;O61203;O44635;O16753;Q9U1R0;O44577;Q8…	2;1;1;1;1;1;1;1;1;1;1;1;1;1;1;1;1;1;1;1;1;1;1;1;1;1;1;1;1;1;1;1;1;1;1;1;1;1;1;1;1;1;1;1;1;1;1;1;1;1;1;1;1;1;1;1;1;1;1;1;1;1;1;1;1;1;1;1;1;1;1;1;1;1;1;1;1;1;1;1;1;1;1;1;1;1;1	O16962	0.483573	-2.16002	3.12717	27.971	0.690983	0.857061	mir-1(gk276) / N2	nhr-55		Nuclear hormone receptor family member nhr-55	T01G6.7	WBGene00003645
	Q18493	2	Q18493	-0.138061	-0.895467	0.619345	24.8078	0.692001	0.857699	mir-1(gk276) / N2			Probable UDP-N-acetylglucosamine pyrophosphorylase	C36A4.4	WBGene00007965
	Q09567	14	Q09567	0.0272691	-0.122799	0.177337	27.8783	0.692907	0.858197	mir-1(gk276) / N2			Uncharacterized protein	F48E8.3	WBGene00018610
	Q22253	3	Q22253	0.0405877	-0.1849	0.266075	27.2887	0.695632	0.858953	mir-1(gk276) / N2	rpn-9		Proteasome Regulatory Particle, Non-ATPase-like	T06D8.8	WBGene00004465
	Q20199	12	Q20199	0.0676556	-0.308556	0.443867	27.3105	0.695896	0.858953	mir-1(gk276) / N2			Uncharacterized protein	F39H12.3	WBGene00018214
	A0A0K3ARI2;U4PBX8;Q9XUF9	5;5;5	Q9XUF9	0.209067	-0.953842	1.37198	24.644	0.695984	0.858953	mir-1(gk276) / N2			Uncharacterized protein	C49C3.4	WBGene00008194
	G5EG14	4	G5EG14	-0.119895	-0.786843	0.547054	24.9421	0.696005	0.858953	mir-1(gk276) / N2	cacn-1		Cactin	W03H9.4	WBGene00012230
	O16997	3	O16997	0.256345	-1.16982	1.68251	25.5808	0.696039	0.858953	mir-1(gk276) / N2	sftb-2		Splicing Factor ThreeB (3b) Subunit homolog	W03F9.10	WBGene00021004
	Q95QN1	7	Q95QN1	0.0410455	-0.188339	0.27043	27.7297	0.697325	0.859032	mir-1(gk276) / N2			Uncharacterized protein	F01F1.15	WBGene00017169
	O18240	28	O18240	0.0805522	-0.369706	0.53081	33.4934	0.697382	0.859032	mir-1(gk276) / N2	rps-18		Ribosomal Protein, Small subunit	Y57G11C.16	WBGene00004487
	Q3Y400	3	Q3Y400	-0.130277	-0.862514	0.60196	25.7071	0.698956	0.859032	mir-1(gk276) / N2	glrx-22		GLutaRedoXin	C07G1.8	WBGene00044608
	O44509	4	O44509	0.0800532	-0.370266	0.530372	24.8297	0.699189	0.859032	mir-1(gk276) / N2			Uncharacterized protein	F42G8.10	WBGene00018361
	Q8MPX3	7	Q8MPX3	-0.0838069	-0.555409	0.387795	26.769	0.699289	0.859032	mir-1(gk276) / N2	dnj-20		DnaJ homolog dnj-20	T15H9.7	WBGene00001038
	Q09217;G8JXY3	5;1	Q09217	0.304254	-1.4089	2.0174	25.2542	0.699462	0.859032	mir-1(gk276) / N2			Uncharacterized protein B0495.8	B0495.8	WBGene00015207
	G5EFF1;D4YW53	6;6	G5EFF1	-0.0382466	-0.253731	0.177238	26.1144	0.699634	0.859032	mir-1(gk276) / N2	asd-2	let-529 star-2 tag-44	RNA-binding protein asd-2	T21G5.5	WBGene00006423
	P34340	3	P34340	0.0489923	-0.227885	0.32587	27.9917	0.700506	0.859482	mir-1(gk276) / N2	col-90		Putative cuticle collagen 90	C29E4.1	WBGene00000665
	Q336L8;O02108	12;12	O02108	0.0290108	-0.135398	0.19342	28.2013	0.70129	0.859824	mir-1(gk276) / N2	cdc-37		Probable Hsp90 co-chaperone cdc37	W08F4.8	WBGene00021097
	Q86NI2;H2KYI5	8;8	Q86NI2	-0.0571224	-0.381475	0.26723	27.2604	0.701838	0.859878	mir-1(gk276) / N2			Uncharacterized protein	C06G3.5	WBGene00015551
	Q19339	4	Q19339	0.0439011	-0.207817	0.295619	27.2438	0.704568	0.8623	mir-1(gk276) / N2	acs-14		Fatty Acid CoA Synthetase family	F11A3.1	WBGene00008669
	O45679	12	O45679	-0.0892682	-0.601585	0.423049	26.4704	0.704828	0.8623	mir-1(gk276) / N2	cysl-2		Bifunctional L-3-cyanoalanine synthase/cysteine synthase	K10H10.2	WBGene00010759
	Q9U3I6;Q19584	3;3	Q19584	-0.115301	-0.778417	0.547816	26.3162	0.705416	0.8624	mir-1(gk276) / N2	ufd-1		Ubiquitin fusion degradation protein 1 homolog	F19B6.2	WBGene00006733
	O44729;A5A8P6	4;1	O44729	0.122162	-0.583742	0.828066	25.7939	0.70673	0.863386	mir-1(gk276) / N2	prp-17		Yeast PRP (Splicing factor) related	F49D11.1	WBGene00018625
	Q20025	8	Q20025	0.0658689	-0.315464	0.447202	29.4891	0.70725	0.863403	mir-1(gk276) / N2	pfn-2		Profilin-2	F35C8.6	WBGene00003990
	H9G2X4;Q564Z7;Q564Z6;H9G2X7;Q18951;H9G2X5;H9G2X6;Q9XVV1	5;5;5;5;5;4;4;4	Q18951	0.0548396	-0.265129	0.374809	26.6647	0.709406	0.864055	mir-1(gk276) / N2			Uncharacterized protein	D1054.9	WBGene00008376
	G5EGM4	2	G5EGM4	0.114069	-0.551604	0.779742	23.4011	0.709455	0.864055	mir-1(gk276) / N2			Uncharacterized protein	M03B6.3	WBGene00010835
	Q564Q1	5	Q564Q1	-0.304721	-2.08356	1.47412	25.0511	0.709546	0.864055	mir-1(gk276) / N2	gale-1		UDP-glucose 4-epimerase	C47B2.6	WBGene00008132
	Q9BLB6	11	Q9BLB6	0.0378219	-0.183182	0.258826	27.9609	0.709813	0.864055	mir-1(gk276) / N2	mog-2	sap-1	Probable U2 small nuclear ribonucleoprotein A'	H20J04.8	WBGene00003390
	Q19722	12	Q19722	-0.0405582	-0.280172	0.199056	28.111	0.712824	0.8671	mir-1(gk276) / N2	nars-1	nrs-1	Asparagine--tRNA ligase, cytoplasmic	F22D6.3	WBGene00003815
	P34714;U4PF73	8;7	P34714	-0.0444871	-0.308473	0.219499	29.6231	0.714022	0.867936	mir-1(gk276) / N2	ost-1	sparc	SPARC	C44B12.2	WBGene00003893
	Q22483	5	Q22483	0.0467187	-0.231506	0.324943	27.899	0.714994	0.868498	mir-1(gk276) / N2			Uncharacterized protein	T14B4.2	WBGene00020499
	Q8MNV5;H2KYV8;A0A2C9C3J8;A0A2C9C3R1;A0A2C9C3A0	5;5;5;5;5	Q8MNV5	0.127658	-0.635226	0.890542	24.9664	0.71593	0.869016	mir-1(gk276) / N2			Uncharacterized protein	C18C4.7	WBGene00015968
	Q9NEQ0	3	Q9NEQ0	-0.0645513	-0.451807	0.322704	26.9557	0.716974	0.869663	mir-1(gk276) / N2	fat-1		Omega-3 fatty acid desaturase fat-1	Y67H2A.8	WBGene00001393
	H2L048;Q8MQ42	15;15	Q8MQ42	0.0302903	-0.153463	0.214044	28.3271	0.719957	0.87266	mir-1(gk276) / N2			Uncharacterized protein	F46H5.7	WBGene00018522
	Q18244	4	Q18244	-0.237754	-1.70492	1.22941	25.5247	0.724475	0.877511	mir-1(gk276) / N2			Uncharacterized protein	C27B7.5	WBGene00007762
	U4PEQ9;O76360;U4PRL6	19;19;5	O76360	0.028852	-0.150235	0.207939	28.5978	0.726004	0.878511	mir-1(gk276) / N2	egl-4	cgk-1 odr-9	cGMP-dependent protein kinase egl-4	F55A8.2	WBGene00001173
	Q93831	17	Q93831	0.0430043	-0.224263	0.310272	29.8367	0.726332	0.878511	mir-1(gk276) / N2			Uncharacterized protein	F59C6.5	WBGene00010326
	Q9XW17	20	Q9XW17	-0.055078	-0.398632	0.288476	29.7724	0.727282	0.879036	mir-1(gk276) / N2	car-1		Cytokinesis, Apoptosis, RNA-associated	Y18D10A.17	WBGene00012484
	Q27527	27	Q27527	-0.0238834	-0.173793	0.126026	31.6917	0.728905	0.880373	mir-1(gk276) / N2	enol-1		Enolase	T21B10.2	WBGene00011884
	Q9BLA0	4	Q9BLA0	-0.116768	-0.851883	0.618347	23.6016	0.729676	0.880391	mir-1(gk276) / N2	fubl-3	fubp-3.3	FUBp (FUBP) Like	C36E6.1	WBGene00016489
	O45444	9	O45444	-0.0586944	-0.428603	0.311215	28.4491	0.729954	0.880391	mir-1(gk276) / N2	clec-63		C-type LECtin	F35C5.6	WBGene00009394
	O17626	23	O17626	-0.0430623	-0.316438	0.230313	30.0898	0.731827	0.882025	mir-1(gk276) / N2			Uncharacterized protein	C31C9.2	WBGene00007836
	P91405	5	P91405	0.160863	-0.869194	1.19092	25.1862	0.734026	0.884027	mir-1(gk276) / N2			Uncharacterized protein	R57.2	WBGene00020083
	P91306	19	P91306	0.0719064	-0.389439	0.533252	29.9788	0.734526	0.884027	mir-1(gk276) / N2	cey-2		C. Elegans Y-box	F46F11.2	WBGene00000473
	O76566;H2KZR3	6;6	O76566	0.30248	-1.64237	2.24733	24.7268	0.73507	0.884057	mir-1(gk276) / N2	unc-96		Uncharacterized protein	F13C5.6	WBGene00006825
	P48150	21	P48150	-0.0429497	-0.321167	0.235267	34.0168	0.73695	0.884978	mir-1(gk276) / N2	rps-14		40S ribosomal protein S14	F37C12.9	WBGene00004483
	Q22053	22	Q22053	-0.0628248	-0.47074	0.34509	31.9475	0.737538	0.884978	mir-1(gk276) / N2	fib-1		rRNA 2'-O-methyltransferase fibrillarin	T01C3.7	WBGene00001423
	O44565;V6CIX7	52;6	O44565	0.0250202	-0.138133	0.188173	30.6671	0.738616	0.884978	mir-1(gk276) / N2	lam-1		LAMinin related. See also lmb	W03F8.5	WBGene00002247
	Q8WTJ4	4	Q8WTJ4	-0.156361	-1.17749	0.864765	24.9247	0.738988	0.884978	mir-1(gk276) / N2	ubxn-6		UBX domain-containing protein 6	H06H21.6	WBGene00019163
	O44989	5	O44989	0.152119	-0.841419	1.14566	25.636	0.739017	0.884978	mir-1(gk276) / N2	col-49		COLlagen	K09H9.3	WBGene00000626
	A0A061AL89;A0A061AJK8;Q21920	6;6;6	Q21920	0.100151	-0.554448	0.754751	29.916	0.7392	0.884978	mir-1(gk276) / N2	mask-1		Ankyrin repeat and KH domain-containing protein mask-1	R11A8.7	WBGene00011240
	Q9XVM0;Q9XVL7	6;5	Q9XVM0	-0.0895858	-0.675771	0.496599	23.7994	0.739474	0.884978	mir-1(gk276) / N2	letm-1		LETM1 (Leucine zipper, EF-hand, TransMembrane mitochondrial protein) homolog	F58G11.1	WBGene00010279
	Q20647	19	Q20647	0.0850023	-0.47366	0.643665	33.1066	0.740577	0.885676	mir-1(gk276) / N2	rpl-25.2		60S ribosomal protein L23a 2	F52B5.6	WBGene00004439
	P20163;V6CL98	36;15	P20163	0.0425438	-0.239881	0.324968	29.0632	0.743055	0.887814	mir-1(gk276) / N2	hsp-4	hsp70d	Heat shock 70 kDa protein D	F43E2.8	WBGene00002008
	Q94269	21	Q94269	-0.0239476	-0.184275	0.13638	29.106	0.745135	0.887814	mir-1(gk276) / N2			Carboxypeptidase	K10C2.1	WBGene00019617
	G8JY94;Q21067	8;8	Q21067	0.041791	-0.238143	0.321725	27.4291	0.745262	0.887814	mir-1(gk276) / N2	ifc-2		Intermediate filament protein ifc-2	M6.1	WBGene00002056
	Q17558	4	Q17558	-0.176474	-1.35998	1.00703	26.1336	0.745553	0.887814	mir-1(gk276) / N2			Uncharacterized protein	C01F1.1	WBGene00015296
	G5EC91	3	G5EC91	-0.195244	-1.50616	1.11567	24.0526	0.745838	0.887814	mir-1(gk276) / N2	dpy-11		DumPY: shorter than wild-type	F46E10.9	WBGene00001073
	O02155	5	O02155	0.0568055	-0.324607	0.438218	28.0776	0.745842	0.887814	mir-1(gk276) / N2			Uncharacterized protein	T09B4.5	WBGene00020379
	P53589	13	P53589	0.0758036	-0.435468	0.587076	28.1582	0.74694	0.887814	mir-1(gk276) / N2	sucg-1		Succinate--CoA ligase [GDP-forming] subunit beta, mitochondrial	C50F7.4	WBGene00016844
	Q20107;F1LIM6	14;9	Q20107	0.0427505	-0.245766	0.331267	29.6831	0.74709	0.887814	mir-1(gk276) / N2	fkb-1		Peptidylprolyl isomerase	F36H1.1	WBGene00001426
	O44549	8	O44549	0.0810359	-0.467098	0.629169	26.7192	0.747637	0.887814	mir-1(gk276) / N2	acdh-3		Acyl CoA DeHydrogenase	K06A5.6	WBGene00019433
	O01497	3	O01497	-0.178119	-1.38401	1.02777	26.2039	0.747854	0.887814	mir-1(gk276) / N2	tyr-4		TYRosinase	C34G6.2	WBGene00016419
	P34328	12	P34328	0.0391905	-0.226436	0.304817	31.1641	0.748129	0.887814	mir-1(gk276) / N2	hsp-12.2	hsp12-2	Heat shock protein Hsp-12.2	C14B9.1	WBGene00002011
	Q09622	14	Q09622	-0.0396666	-0.309068	0.229734	29.1578	0.748621	0.887814	mir-1(gk276) / N2	puf-12		Pumilio domain-containing protein 12	ZK945.3	WBGene00014165
	Q9XXA2	3	Q9XXA2	-0.0419821	-0.328308	0.244344	25.3461	0.749632	0.888395	mir-1(gk276) / N2	ebp-2		Microtubule End Binding Protein	VW02B12L.3	WBGene00012156
	P45968	7	P45968	-0.0510068	-0.401259	0.299245	26.015	0.751265	0.88907	mir-1(gk276) / N2	cec-3	eap-1	Chromo domain-containing protein cec-3	T09A5.8	WBGene00011636
	Q20822	5	Q20822	-0.379415	-2.98745	2.22862	25.7656	0.751511	0.88907	mir-1(gk276) / N2	srpa-68		Probable signal recognition particle subunit SRP68	F55C5.8	WBGene00010097
	Q86DC6	7	Q86DC6	-0.261747	-2.06288	1.53939	25.5366	0.751768	0.88907	mir-1(gk276) / N2	ifd-1		Intermediate filament protein ifd-1	R04E5.10	WBGene00002057
	Q17832;B3GWB2;O62360	133;97;1	Q17832	-0.0260636	-0.207651	0.155524	34.4947	0.754712	0.891933	mir-1(gk276) / N2	vgln-1		ViGiLN homolog	C08H9.2	WBGene00007463
	D3YT36;Q23539;D3YT37	10;9;6	D3YT36	-0.044336	-0.354345	0.265673	26.8559	0.755563	0.892319	mir-1(gk276) / N2	pyk-2		Pyruvate kinase	ZK593.1	WBGene00014001
	Q9TXH9	10	Q9TXH9	0.0210139	-0.126259	0.168287	28.9588	0.756104	0.892339	mir-1(gk276) / N2	ubxn-1		UBX domain-containing protein 1	F23C8.4	WBGene00017733
	P52009	15	P52009	0.0236042	-0.142638	0.189847	30.9282	0.757256	0.892786	mir-1(gk276) / N2	cyn-1	cyp-1	Peptidyl-prolyl cis-trans isomerase 1	Y49A3A.5	WBGene00000877
	P34339	36	P34339	-0.0288487	-0.232267	0.174569	31.1345	0.757532	0.892786	mir-1(gk276) / N2	egl-45	eif-3.A	Eukaryotic translation initiation factor 3 subunit A	C27D11.1	WBGene00001209
	Q22968	24	Q22968	-0.0348522	-0.281586	0.211882	29.9344	0.758463	0.892824	mir-1(gk276) / N2	gcst-1		Aminomethyltransferase	F25B4.1	WBGene00017765
	P90901	38	P90901	0.0205263	-0.125392	0.166445	30.5412	0.759428	0.892824	mir-1(gk276) / N2	ifa-1		Intermediate filament protein ifa-1	F38B2.1	WBGene00002050
	A7LPI7;Q9XVD4	3;1	A7LPI7	-0.0914619	-0.743239	0.560315	24.7292	0.759992	0.892824	mir-1(gk276) / N2			Uncharacterized protein	C24H11.5	WBGene00007702
	Q22046;Q58AA7	2;1	Q22046	-0.29853	-2.42691	1.82985	22.92	0.7601	0.892824	mir-1(gk276) / N2			Uncharacterized protein	T01B7.5	WBGene00011311
	P34552	20	P34552	0.0352599	-0.216219	0.286739	28.1269	0.760185	0.892824	mir-1(gk276) / N2	alx-1	pqn-58	Apoptosis-linked gene 2-interacting protein X 1	R10E12.1	WBGene00007010
	G5ECG8;G5EFW2;G5ECP9;G5EEC4;G5EFK7	101;101;101;101;100	G5ECG8	0.0222294	-0.138814	0.183273	31.2709	0.763779	0.895737	mir-1(gk276) / N2	vab-10		Uncharacterized protein	ZK1151.1	WBGene00006876
	P52715	4	P52715	-0.0397586	-0.327992	0.248475	26.4319	0.763936	0.895737	mir-1(gk276) / N2			Uncharacterized serine carboxypeptidase F13S12.6	F13D12.6	WBGene00008741
	O17345;Q03575	9;2	O17345	0.0564047	-0.353059	0.465869	28.629	0.764243	0.895737	mir-1(gk276) / N2	ttr-6		TransThyretin-Related family domain	T28B4.3	WBGene00020886
	Q21281	26	Q21281	-0.0360751	-0.300855	0.228705	28.3115	0.766735	0.897862	mir-1(gk276) / N2	mup-4		Transmembrane matrix receptor MUP-4	K07D8.1	WBGene00003497
	O45495	8	O45495	0.0462072	-0.293505	0.38592	29.0177	0.767111	0.897862	mir-1(gk276) / N2	uev-1		Ubiquitin-conjugating enzyme E2 variant 1	F39B2.2	WBGene00006730
	O62137	3	O62137	-0.0424877	-0.357212	0.272236	26.3102	0.768797	0.899218	mir-1(gk276) / N2	acox-1.2	acox-2	Acyl-coenzyme A oxidase	F08A8.2	WBGene00008565
	Q17439	6	Q17439	0.0503466	-0.324939	0.425632	26.7399	0.770196	0.899983	mir-1(gk276) / N2			Uncharacterized protein B0035.15	B0035.15	WBGene00007113
	Q9XZI6	3	Q9XZI6	0.242157	-1.56856	2.05288	25.5034	0.770892	0.899983	mir-1(gk276) / N2	unc-11		Phosphatidylinositol-binding clathrin assembly protein unc-11	C32E8.10	WBGene00006751
	Q9U2Z5	7	Q9U2Z5	0.0537513	-0.348707	0.45621	26.4667	0.771187	0.899983	mir-1(gk276) / N2			Uncharacterized protein	Y106G6H.14	WBGene00013724
	G4S428;Q19429	10;10	Q19429	0.0529947	-0.344552	0.450541	29.1202	0.771607	0.899983	mir-1(gk276) / N2			Uncharacterized protein	F13H8.5	WBGene00017438
	Q20448	5	Q20448	-0.0277912	-0.23673	0.181148	27.4206	0.772093	0.899983	mir-1(gk276) / N2	ztf-7		Zinc finger putative Transcription Factor family	F46B6.7	WBGene00009772
	P31161;P41977	4;1	P31161	-0.0454282	-0.388122	0.297266	26.1269	0.772838	0.900235	mir-1(gk276) / N2	sod-2	sdm-1	Superoxide dismutase [Mn] 1, mitochondrial	F10D11.1	WBGene00004931
	Q21732	3	Q21732	-0.309585	-2.661	2.04183	25.9091	0.774337	0.901364	mir-1(gk276) / N2			Uncharacterized protein	R04F11.2	WBGene00011015
	P90868	6	P90868	-0.0630457	-0.543276	0.417185	26.6053	0.774962	0.901476	mir-1(gk276) / N2	pbs-7		Proteasome subunit beta	F39H11.5	WBGene00003953
	O17921	19	O17921	0.143393	-0.963512	1.2503	24.3046	0.777851	0.903747	mir-1(gk276) / N2	tbb-1		Tubulin beta chain	K01G5.7	WBGene00006536
	O45499	17	O45499	0.056337	-0.379576	0.49225	33.6956	0.778358	0.903747	mir-1(gk276) / N2	rps-26		40S ribosomal protein S26	F39B2.6	WBGene00004495
	S6FWN4;S6F510;N1NVB5;S6FCX2;N1NV09	4;3;2;2;2	S6FWN4	-0.0459252	-0.401523	0.309672	26.046	0.778507	0.903747	mir-1(gk276) / N2	kcc-1		K+/Cl-Cotransporter	R13A1.2	WBGene00006504
	Q9XW37	6	Q9XW37	-0.0389964	-0.344682	0.26669	28.4857	0.781135	0.90618	mir-1(gk276) / N2			Uncharacterized protein	Y69E1A.5	WBGene00013477
	Q965Y1;U4PER3;U4PBI7	10;4;1	Q965Y1	-0.040418	-0.35984	0.279004	28.1928	0.782859	0.906804	mir-1(gk276) / N2	map-1		Methionine aminopeptidase	Y37E11AL.7	WBGene00003129
	O44400	23	O44400	-0.0463948	-0.413322	0.320532	29.8904	0.783015	0.906804	mir-1(gk276) / N2			Protein F37C4.5	F37C4.5	WBGene00018145
	P48158	20	P48158	-0.052988	-0.47358	0.367604	32.4195	0.783777	0.906804	mir-1(gk276) / N2	rpl-23		60S ribosomal protein L23	B0336.10	WBGene00004435
	G3MU38;Q18785;D6R8W7	12;12;9	Q18785	0.0252994	-0.176161	0.22676	29.8707	0.78445	0.906804	mir-1(gk276) / N2	mif-2		MIF-like protein mif-2	C52E4.2	WBGene00003235
	Q09983	12	Q09983	0.0349822	-0.243831	0.313795	28.0809	0.784637	0.906804	mir-1(gk276) / N2			Uncharacterized protein	F30H5.3	WBGene00017937
	Q9XUB6;A0A061AKS9	5;4	Q9XUB6	-0.0440459	-0.395486	0.307394	27.8914	0.784868	0.906804	mir-1(gk276) / N2	pqn-74		Prion-like-(Q/N-rich)-domain-bearing protein	W02A2.3	WBGene00004156
	Q9Y0V6	10	Q9Y0V6	0.0208985	-0.146807	0.188604	29.9167	0.78606	0.907439	mir-1(gk276) / N2	tin-10	tim-10	Mitochondrial import inner membrane translocase subunit Tim10	Y66D12A.22	WBGene00006573
	P91499	4	P91499	-0.168685	-1.53411	1.19675	24.7688	0.787855	0.907439	mir-1(gk276) / N2	ssp-16		Sperm-specific class P protein 16	T27A3.3	WBGene00006044
	K7ZUH9;P08898;Q10453;H2L2I6;Q9U281	9;9;8;6;4	P08898	-0.064996	-0.591664	0.461672	30.5766	0.788072	0.907439	mir-1(gk276) / N2	his-2; his-6; his-9; his-13; his-17; his-25; his-27; his-32; his-42; his-45; his-49; his-55; his-59; his-63		Histone H3	T10C6.13_F45F2.13_ZK131.3_ZK131.7_K06C4.5_ZK131.2_K06C4.13_F17E9.10_F08G2.3_B0035.10_F07B7.5_F54E12.1_F55G1.2_F22B3.2	WBGene00001919_WBGene00001923_WBGene00001916_WBGene00001906_WBGene00001937_WBGene00001880_WBGene00001929_WBGene00001933_WBGene00001901_WBGene00001891_WBGene00001876_WBGene00001899_WBGene00001883_WBGene00001887
	P91372	4	P91372	0.0280973	-0.200546	0.256741	27.4535	0.788945	0.907439	mir-1(gk276) / N2			Uncharacterized protein	K11H12.7	WBGene00019663
	O45279	4	O45279	-0.0640202	-0.585209	0.457169	25.5715	0.789032	0.907439	mir-1(gk276) / N2	dlat-2		DihydroLipoyllysine-residue AcetylTransferase	C30H6.7	WBGene00007824
	Q21693	9	Q21693	0.0233859	-0.167742	0.214514	28.5833	0.78983	0.907439	mir-1(gk276) / N2	ife-2		Eukaryotic translation initiation factor 4E-2	R04A9.4	WBGene00002060
	O17861	10	O17861	0.026756	-0.192201	0.245713	28.9248	0.790097	0.907439	mir-1(gk276) / N2			GILT-like protein F37H8.5	F37H8.5	WBGene00009514
	P41932;N1NV25	29;7	P41932	-0.0240216	-0.220705	0.172662	31.6723	0.790204	0.907439	mir-1(gk276) / N2	par-5	ftt-1	14-3-3-like protein 1	M117.2	WBGene00003920
	O44625	2	O44625	0.153233	-1.10146	1.40792	25.4355	0.790212	0.907439	mir-1(gk276) / N2	pqn-51		Prion-like-(Q/N-rich)-domain-bearing protein	K11D12.2	WBGene00004136
	O44739	10	O44739	-0.0363779	-0.335994	0.263239	27.575	0.791405	0.908196	mir-1(gk276) / N2	bag-1		BAG family molecular chaperone regulator 1	F57B10.11	WBGene00000236
	Q19218	3	Q19218	0.244534	-1.78897	2.27804	25.0358	0.793349	0.909814	mir-1(gk276) / N2	col-130		COLlagen	F08G5.4	WBGene00000704
	Q19877	20	Q19877	0.0648378	-0.47761	0.607286	33.1357	0.794561	0.910591	mir-1(gk276) / N2	rps-23		40S ribosomal protein S23	F28D1.7	WBGene00004492
	G1K0V8;P34563;G1K0V9	17;17;1	P34563	-0.0412706	-0.390627	0.308085	31.5671	0.796897	0.912654	mir-1(gk276) / N2	iff-1		Eukaryotic translation initiation factor 5A-1	T05G5.10	WBGene00002064
	Q19052	7	Q19052	-0.0283247	-0.272891	0.216241	27.5974	0.800783	0.916488	mir-1(gk276) / N2	eif-2A		Eukaryotic translation initiation factor 2A	E04D5.1	WBGene00008480
	Q23280	7	Q23280	0.0277804	-0.213821	0.269381	29.9941	0.802179	0.917469	mir-1(gk276) / N2	daf-41	p23	Co-chaperone protein daf-41	ZC395.10	WBGene00022599
	Q20634	7	Q20634	-0.0371965	-0.36191	0.287517	28.0774	0.802906	0.917563	mir-1(gk276) / N2	gcsh-2		Glycine cleavage system H protein	F52A8.5	WBGene00009918
	G5ECR0	9	G5ECR0	-0.0341726	-0.333161	0.264816	27.1729	0.803339	0.917563	mir-1(gk276) / N2			Uncharacterized protein	T25C12.3	WBGene00012018
	Q17763	35	Q17763	-0.0164631	-0.162013	0.129087	33.4589	0.805328	0.917857	mir-1(gk276) / N2	atp-5		ATP synthase subunit	C06H2.1	WBGene00007385
	Q95005	14	Q95005	-0.0268545	-0.264843	0.211134	28.8339	0.805783	0.917857	mir-1(gk276) / N2	pas-4		Proteasome subunit alpha type-7	C36B1.4	WBGene00003925
	V6CLR8;V6CJD7;V6CLV8;Q9TW65;V6CJE3;V6CKJ6;V6CL65;V6CLW7	4;4;4;4;3;3;1;1	Q9TW65	-0.043932	-0.43625	0.348386	24.3686	0.807227	0.917857	mir-1(gk276) / N2	dys-1		Dystrophin-1	F15D3.1	WBGene00001131
	Q03598	3	Q03598	-0.0334391	-0.332845	0.265967	25.9055	0.807725	0.917857	mir-1(gk276) / N2	ufc-1		Ubiquitin-fold modifier-conjugating enzyme 1	C40H1.6	WBGene00008041
	G5EEP7;G5EDT4	2;2	G5EDT4	-0.0813168	-0.810797	0.648164	25.0267	0.808083	0.917857	mir-1(gk276) / N2			Uncharacterized protein	T01D3.6	WBGene00011330
	Q02335	3	Q02335	-0.152067	-1.52045	1.21632	24.5993	0.808661	0.917857	mir-1(gk276) / N2	tomm-70		Mitochondrial import receptor subunit tomm-70	ZK370.8	WBGene00022722
	Q9XW58	6	Q9XW58	-0.0469548	-0.469935	0.376026	26.0018	0.808862	0.917857	mir-1(gk276) / N2			U3 small nucleolar ribonucleoprotein protein MPP10	Y75B8A.7	WBGene00013544
	A9UJN7	12	A9UJN7	0.121148	-0.97079	1.21309	23.3863	0.808965	0.917857	mir-1(gk276) / N2	maph-1.2		Microtubule-Associated Protein Homolog	F25D7.4	WBGene00009113
	O17622	8	O17622	0.0251287	-0.202192	0.25245	28.1797	0.809647	0.917857	mir-1(gk276) / N2			UMP-CMP kinase 1	C29F7.3	WBGene00007812
	P92005	4	P92005	0.0259173	-0.208622	0.260457	27.6821	0.809715	0.917857	mir-1(gk276) / N2	cpz-2		CathePsin Z	M04G12.2	WBGene00000789
	Q23155	5	Q23155	0.0566508	-0.458136	0.571438	27.4959	0.810482	0.917857	mir-1(gk276) / N2	mrps-11		Mitochondrial Ribosomal Protein, Small	W04D2.5	WBGene00012244
	Q09936	26	Q09936	-0.0263756	-0.266463	0.213712	30.5432	0.810799	0.917857	mir-1(gk276) / N2			Uncharacterized protein C53C9.2	C53C9.2	WBGene00016898
	Q8IA89;Q8MXK1;O16249;Q6A598;G5ED87	12;11;11;9;1	Q8IA89	-0.0390832	-0.395904	0.317738	27.7502	0.81135	0.917857	mir-1(gk276) / N2			Uncharacterized protein	F44E7.4	WBGene00018426
	Q20760	4	Q20760	0.0639138	-0.520549	0.648377	25.1939	0.811648	0.917857	mir-1(gk276) / N2			Uncharacterized protein	F54C9.9	WBGene00010044
	Q94185	2	Q94185	-0.106522	-1.08254	0.869496	25.0085	0.812011	0.917857	mir-1(gk276) / N2	dpy-6		DumPY: shorter than wild-type	F16F9.2	WBGene00001068
	G5EE74	8	G5EE74	0.0192919	-0.157673	0.196257	28.2455	0.81222	0.917857	mir-1(gk276) / N2	nud-1		Aspergillus NUclear Division related	F53A2.4	WBGene00003829
	Q18886	10	Q18886	-0.031841	-0.326855	0.263173	28.4871	0.814049	0.918718	mir-1(gk276) / N2	vps-32.1		Related to yeast Vacuolar Protein Sorting factor	C56C10.3	WBGene00016961
	G5EBI0	5	G5EBI0	-0.134363	-1.37996	1.11123	25.5511	0.814149	0.918718	mir-1(gk276) / N2	4D656		4D656	Y54G2A.18	WBGene00021883
	G5ECV9	3	G5ECV9	-0.0761601	-0.785553	0.633233	25.4878	0.815012	0.918718	mir-1(gk276) / N2	alh-3		10-formyltetrahydrofolate dehydrogenase	F36H1.6	WBGene00000109
	P34415	2	P34415	0.199657	-1.66495	2.06426	26.158	0.815487	0.918718	mir-1(gk276) / N2			Uncharacterized protein F42H10.2	F42H10.2	WBGene00018366
	O61815	4	O61815	0.0391734	-0.327057	0.405403	27.5451	0.815679	0.918718	mir-1(gk276) / N2			RNA helicase	B0511.6	WBGene00015232
	G5EC21	9	G5EC21	0.0258102	-0.217612	0.269232	27.8553	0.817255	0.919884	mir-1(gk276) / N2	qua-1		Protein qua-1	T05C12.10	WBGene00004264
	Q22192	5	Q22192	-0.124303	-1.30453	1.05592	25.7889	0.818452	0.919892	mir-1(gk276) / N2	ttr-14		TransThyretin-Related family domain	T05A10.3	WBGene00011460
	Q21601	2	Q21601	-0.181478	-1.91221	1.54925	25.4184	0.819237	0.919892	mir-1(gk276) / N2	mrps-34		Mitochondrial Ribosomal Protein, Small	M88.2	WBGene00010905
	Q9N4H7	10	Q9N4H7	-0.0219009	-0.231312	0.18751	28.2369	0.819699	0.919892	mir-1(gk276) / N2	copa-1		Coatomer subunit alpha	Y71F9AL.17	WBGene00022119
	Q9TXK1	2	Q9TXK1	0.13225	-1.13327	1.39777	25.5456	0.819835	0.919892	mir-1(gk276) / N2			Uncharacterized protein	F54E2.1	WBGene00018823
	G5EEK2	10	G5EEK2	0.116905	-1.0041	1.23791	25.2915	0.820201	0.919892	mir-1(gk276) / N2	golg-4		GOLGi associated coiled-coil protein homolog	F59A2.6	WBGene00010306
	P02567	148	P02567	-0.0178285	-0.18908	0.153423	33.0869	0.820503	0.919892	mir-1(gk276) / N2	myo-1		Myosin-1	R06C7.10	WBGene00002348
	A0A2C9C305;A0A2C9C3E9;A0A2C9C3A1	31;31;2	A0A2C9C305	-0.0190771	-0.205343	0.167188	29.5932	0.823358	0.921644	mir-1(gk276) / N2			Uncharacterized protein	C18H9.3	WBGene00016002
	Q20531	2	Q20531	0.338702	-2.98097	3.65838	27.9418	0.824018	0.921644	mir-1(gk276) / N2	clec-78		C-type LECtin	F47C12.2	WBGene00018547
	O02141	6	O02141	-0.0286021	-0.309219	0.252014	27.4917	0.824192	0.921644	mir-1(gk276) / N2			Uncharacterized protein	C46G7.2	WBGene00016722
	Q9XU45	6	Q9XU45	0.155939	-1.37432	1.6862	24.9815	0.82423	0.921644	mir-1(gk276) / N2			Uncharacterized protein	B0379.1	WBGene00007155
	P91989	2	P91989	-0.172013	-1.86658	1.52255	25.0598	0.824899	0.921786	mir-1(gk276) / N2			Uncharacterized protein	F25H9.7	WBGene00009139
	P19974;CON__P62894	13;1	P19974	0.0235326	-0.209523	0.256588	31.4319	0.825803	0.922076	mir-1(gk276) / N2	cyc-2.1		Cytochrome c 2.1	E04A4.7	WBGene00017121
	Q93243	4	Q93243	-0.195061	-2.13182	1.74169	25.7038	0.826241	0.922076	mir-1(gk276) / N2	nas-37		Zinc metalloproteinase nas-37	C17G1.6	WBGene00003553
	O16309	13	O16309	0.0201311	-0.181563	0.221825	30.2548	0.827774	0.923143	mir-1(gk276) / N2	fkb-3		Peptidylprolyl isomerase	C05C8.3	WBGene00001428
	Q20719	12	Q20719	0.0241139	-0.219674	0.267902	29.3205	0.829294	0.923143	mir-1(gk276) / N2			Probable NADH dehydrogenase [ubiquinone] flavoprotein 2, mitochondrial	F53F4.10	WBGene00009992
	O17157;A0A0K3AUI3;A0A0K3AQY8;Q95X81	4;3;3;3	O17157	0.0517727	-0.471876	0.575422	24.5648	0.829369	0.923143	mir-1(gk276) / N2			Uncharacterized protein	C24H12.4	WBGene00016073
	Q9N3H3	7	Q9N3H3	-0.0362107	-0.403732	0.33131	27.6528	0.829949	0.923143	mir-1(gk276) / N2			Uncharacterized protein	Y53G8AL.2	WBGene00021800
	H2KYP5;Q8I7I6	5;3	H2KYP5	0.208587	-1.91431	2.33149	25.4763	0.830409	0.923143	mir-1(gk276) / N2			Uncharacterized protein	C10G8.8	WBGene00015684
	G5EG13	8	G5EG13	-0.016493	-0.185262	0.152276	26.0347	0.831308	0.923143	mir-1(gk276) / N2	dhs-12		DeHydrogenases, Short chain	K08F4.9	WBGene00000975
	P34334	30	P34334	0.0339911	-0.319436	0.387418	34.1288	0.833938	0.923143	mir-1(gk276) / N2	rpl-21		60S ribosomal protein L21	C14B9.7	WBGene00004433
	Q9NEQ8	3	Q9NEQ8	-0.24115	-2.74885	2.26655	26.5063	0.833958	0.923143	mir-1(gk276) / N2			Uncharacterized protein	Y59A8B.8	WBGene00013345
	Q21323;U4PBX2	4;3	Q21323	-0.0261387	-0.29816	0.245882	27.159	0.834082	0.923143	mir-1(gk276) / N2	rnp-3		RNP (RRM RNA binding domain) containing	K08D10.3	WBGene00004386
	Q03577	8	Q03577	0.0240249	-0.227119	0.275168	27.0877	0.83481	0.923143	mir-1(gk276) / N2	dars-1	drs-1	Aspartate--tRNA ligase, cytoplasmic	B0464.1	WBGene00001094
	Q27532;Q27489	5;1	Q27532	0.0540983	-0.51332	0.621516	29.2088	0.835355	0.923143	mir-1(gk276) / N2	his-74		Histone H3.3-like type 2	W05B10.1	WBGene00012276
	O16303	14	O16303	-0.0233422	-0.268539	0.221855	29.1797	0.835598	0.923143	mir-1(gk276) / N2	dnj-19		DNaJ domain (Prokaryotic heat shock protein)	T05C3.5	WBGene00001037
	O77081	2	O77081	0.235103	-2.23505	2.70525	27.7028	0.835632	0.923143	mir-1(gk276) / N2	tpst-1		Protein-tyrosine sulfotransferase A	Y111B2A.15	WBGene00013737
	O02161	9	O02161	-0.022516	-0.259297	0.214265	27.8382	0.835778	0.923143	mir-1(gk276) / N2	tin-44		Probable mitochondrial import inner membrane translocase subunit tin-44	T09B4.9	WBGene00020383
	Q10021	3	Q10021	0.151267	-1.44428	1.74682	26.2097	0.836264	0.923143	mir-1(gk276) / N2	rsp-5	srp-3	Probable splicing factor, arginine/serine-rich 5	T28D9.2	WBGene00004702
	A0A1C3NSL5;Q23307	6;6	Q23307	-0.0261868	-0.302583	0.25021	27.125	0.83637	0.923143	mir-1(gk276) / N2			Uncharacterized protein ZC412.3	ZC412.3	WBGene00013884
	C2BR91	2	C2BR91	0.0559466	-0.536521	0.648414	24.0184	0.836902	0.923143	mir-1(gk276) / N2			Cystatin	C39B5.5	WBGene00016523
	Q95ZT1;Q20655;W6EKY2	20;20;18	Q20655	0.0280327	-0.270434	0.3265	32.0583	0.837765	0.923143	mir-1(gk276) / N2	ftt-2		14-3-3-like protein 2	F52D10.3	WBGene00001502
	Q18787	18	Q18787	-0.0299659	-0.349267	0.289335	28.168	0.83789	0.923143	mir-1(gk276) / N2	rpt-1		26S proteasome regulatory subunit 7	C52E4.4	WBGene00004501
	Q9NAP9	5	Q9NAP9	-0.0194927	-0.227515	0.18853	25.81	0.838135	0.923143	mir-1(gk276) / N2	mrps-15		28S ribosomal protein S15, mitochondrial	K07A12.7	WBGene00010624
	G5EEJ7	6	G5EEJ7	0.0546121	-0.530085	0.639309	29.0986	0.838649	0.923143	mir-1(gk276) / N2	msd-2	msd-1 msd-3 msd-4	Major Sperm protein Domain containing	C35D10.11_F44D12.3_F44D12.5_F44D12.7	WBGene00016447_WBGene00009680_WBGene00009682_WBGene00009684
	P90789	6	P90789	0.0319602	-0.311468	0.375388	29.0705	0.839227	0.923143	mir-1(gk276) / N2			NADH dehydrogenase [ubiquinone] 1 beta subcomplex subunit 7	D2030.4	WBGene00008414
	Q10008	3	Q10008	0.0346455	-0.339152	0.408443	26.3993	0.839868	0.923143	mir-1(gk276) / N2			Uncharacterized protein T19C3.2	T19C3.2	WBGene00020560
	Q9U2U0;A0A0K3AXF6	8;4	Q9U2U0	0.0298304	-0.2936	0.35326	27.7287	0.84064	0.923143	mir-1(gk276) / N2	uaf-2		U2AF splicing factor	Y116A8C.35	WBGene00006698
	O45293	4	O45293	-0.0309547	-0.369216	0.307306	26.2462	0.841865	0.923143	mir-1(gk276) / N2	gly-8		Probable N-acetylgalactosaminyltransferase 8	Y66A7A.6	WBGene00001633
	O16376;A9D4S6	3;3	O16376	-0.299859	-3.58401	2.98429	26.7759	0.842216	0.923143	mir-1(gk276) / N2			Uncharacterized protein	M03F8.3	WBGene00019762
	Q9GZH4	17	Q9GZH4	0.0277147	-0.275858	0.331287	28.3637	0.842233	0.923143	mir-1(gk276) / N2	ribo-1		Dolichyl-diphosphooligosaccharide--protein glycosyltransferase subunit 1	T22D1.4	WBGene00020683
	Q7JLJ0;Q8I4K2;Q7JLI9	5;5;4	Q8I4K2	0.151508	-1.50955	1.81256	25.0164	0.842375	0.923143	mir-1(gk276) / N2			Uncharacterized protein	F32D8.12	WBGene00009334
	O62185	3	O62185	-0.117705	-1.42578	1.19037	24.9693	0.844466	0.923878	mir-1(gk276) / N2	rsr-1		SR protein related	F28D9.1	WBGene00004706
	H2KZ73;H8W3Y1;Q8T3B7	42;42;41	H2KZ73	0.01525	-0.154434	0.184934	30.8726	0.844654	0.923878	mir-1(gk276) / N2	noah-1		NOmpA Homolog (Drosophila nompA: no mechanoreceptor potential A)	C34G6.6	WBGene00016422
	Q21735	6	Q21735	0.033316	-0.337661	0.404293	27.0361	0.844767	0.923878	mir-1(gk276) / N2	ran-4		Probable nuclear transport factor 2	R05D11.3	WBGene00004305
	Q21993	8	Q21993	0.0146809	-0.149956	0.179318	27.4796	0.845848	0.923878	mir-1(gk276) / N2	pfd-5		Probable prefoldin subunit 5	R151.9	WBGene00020112
	O02365	44	O02365	-0.0137501	-0.16798	0.140479	31.7835	0.845879	0.923878	mir-1(gk276) / N2	mua-6	ifa-2	Intermediate filament protein ifa-2	W10G6.3	WBGene00003485
	Q9N4Z7;Q65XY0	10;9	Q9N4Z7	-0.0186308	-0.228186	0.190924	27.515	0.8463	0.923878	mir-1(gk276) / N2	mvk-1		MeValonate Kinase	Y42G9A.4	WBGene00021534
	P49404	5	P49404	-0.171157	-2.10789	1.76557	25.2431	0.847207	0.924275	mir-1(gk276) / N2	mrps-18C		Putative 39S ribosomal protein L3, mitochondrial	C26E6.6	WBGene00016142
	Q18786	9	Q18786	0.024179	-0.250647	0.299005	28.9537	0.84788	0.924417	mir-1(gk276) / N2	snr-4		Probable small nuclear ribonucleoprotein Sm D2	C52E4.3	WBGene00004917
	Q9NEY7	3	Q9NEY7	0.020133	-0.215424	0.25569	27.1828	0.85216	0.928252	mir-1(gk276) / N2			Uncharacterized protein	Y105E8A.11	WBGene00013671
	Q965Q1	19	Q965Q1	-0.0200766	-0.258136	0.217982	32.2683	0.854098	0.928252	mir-1(gk276) / N2			Uncharacterized protein	Y22D7AL.10	WBGene00021248
	Q17348	10	Q17348	0.0200462	-0.218623	0.258716	28.9878	0.854684	0.928252	mir-1(gk276) / N2	snr-1		Small nuclear ribonucleoprotein Sm D3	Y116A8C.42	WBGene00004914
	O44556;K8ERV5	13;13	O44556	-0.0259517	-0.335542	0.283639	28.3184	0.854967	0.928252	mir-1(gk276) / N2	tnt-4		TropoNin T	T08B1.2	WBGene00006589
	P34629	3	P34629	0.0790085	-0.86563	1.02365	23.8015	0.855286	0.928252	mir-1(gk276) / N2	lap-1		Leucine aminopeptidase 1	ZK353.6	WBGene00002249
	O17389	7	O17389	0.026363	-0.289321	0.342047	27.3518	0.855505	0.928252	mir-1(gk276) / N2	tth-1		Thymosin beta	F08F1.8	WBGene00006649
	Q20430	6	Q20430	0.0244623	-0.268916	0.31784	26.9201	0.855726	0.928252	mir-1(gk276) / N2	mrpl-14		Mitochondrial Ribosomal Protein, Large	F45E12.5	WBGene00018475
	Q17405;H9G2W1	12;10	Q17405	-0.0346939	-0.450874	0.381486	27.5489	0.855758	0.928252	mir-1(gk276) / N2			Aminopeptidase-like protein AC3.5	AC3.5	WBGene00007071
	Q966L5	16	Q966L5	0.024226	-0.269648	0.3181	28.2915	0.85734	0.929377	mir-1(gk276) / N2			Serrate RNA effector molecule homolog	E01A2.2	WBGene00017085
	O76840	73	O76840	-0.0120922	-0.159771	0.135586	33.0237	0.858288	0.929812	mir-1(gk276) / N2	mig-6	ppn-1	Papilin	C37C3.6	WBGene00003242
	H2KYH5;Q95QX5;Q86GT7	8;8;1	Q95QX5	0.0369588	-0.430502	0.504419	26.208	0.86311	0.934442	mir-1(gk276) / N2			Uncharacterized protein	C07A12.7	WBGene00015561
	O17587	3	O17587	0.12022	-1.41647	1.65691	25.371	0.864531	0.93494	mir-1(gk276) / N2	rpoa-12		DNA-directed RNA polymerase subunit	C15H11.8	WBGene00007616
	Q9XVF7	45	Q9XVF7	0.0197104	-0.232493	0.271913	35.1083	0.864668	0.93494	mir-1(gk276) / N2	rpl-2	rpl-8	60S ribosomal protein L8	B0250.1	WBGene00004413
	O17953	38	O17953	0.0167029	-0.20019	0.233596	32.3821	0.866626	0.936281	mir-1(gk276) / N2	dld-1		Dihydrolipoyl dehydrogenase, mitochondrial	LLC1.3	WBGene00010794
	P90900	5	P90900	-0.112202	-1.57343	1.34903	24.8261	0.867009	0.936281	mir-1(gk276) / N2	ifa-4		Intermediate filament protein ifa-4	K05B2.3	WBGene00002052
	Q27487	10	Q27487	0.0158981	-0.196674	0.22847	28.4418	0.870432	0.938669	mir-1(gk276) / N2	ctl-2	cat cat-1	Peroxisomal catalase 1	Y54G11A.5	WBGene00000831
	P10567	91	P10567	0.0156713	-0.194365	0.225707	34.4314	0.870735	0.938669	mir-1(gk276) / N2	unc-15		Paramyosin	F07A5.7	WBGene00006754
	O02328	17	O02328	-0.0243519	-0.351083	0.302379	28.6636	0.870873	0.938669	mir-1(gk276) / N2	eif-3.C		Eukaryotic translation initiation factor 3 subunit C	T23D8.4	WBGene00001226
	Q9XWD1	5	Q9XWD1	-0.0923755	-1.34407	1.15932	24.5895	0.872128	0.939349	mir-1(gk276) / N2	acs-5		Fatty Acid CoA Synthetase family	Y76A2B.3	WBGene00013575
	Q27464	3	Q27464	0.0738251	-0.930318	1.07797	24.4975	0.872607	0.939349	mir-1(gk276) / N2	gspd-1		Glucose-6-phosphate 1-dehydrogenase	B0035.5	WBGene00007108
	Q20748	23	Q20748	-0.0131524	-0.197942	0.171638	29.6529	0.876634	0.942537	mir-1(gk276) / N2	atad-3		ATPase family AAA domain-containing protein 3	F54B3.3	WBGene00010015
	P53703	6	P53703	-0.0155049	-0.234004	0.202994	28.1733	0.877001	0.942537	mir-1(gk276) / N2	cchl-1		Probable cytochrome c-type heme lyase	T06D8.6	WBGene00011527
	Q19289	81	Q19289	-0.00969682	-0.147103	0.127709	32.9922	0.877671	0.942537	mir-1(gk276) / N2	ifb-1		Intermediate filament protein ifb-1	F10C1.2	WBGene00002053
	Q4A1S8;O45924;O45930	11;11;1	O45924	-0.0182493	-0.277646	0.241147	28.5264	0.878045	0.942537	mir-1(gk276) / N2	bckd-1A		2-oxoisovalerate dehydrogenase subunit alpha, mitochondrial	Y39E4A.3	WBGene00012713
	P91495	5	P91495	0.0177009	-0.234608	0.27001	26.2293	0.878384	0.942537	mir-1(gk276) / N2	npp-12		Nuclear Pore complex Protein	T23H2.1	WBGene00003798
	O02639	41	O02639	0.0135777	-0.181095	0.208251	34.4853	0.879088	0.942537	mir-1(gk276) / N2	rpl-19		60S ribosomal protein L19	C09D4.5	WBGene00004431
	Q86S66;V6CM32	16;1	Q86S66	0.0160636	-0.214937	0.247065	33.2999	0.879443	0.942537	mir-1(gk276) / N2	icd-2		Nascent polypeptide-associated complex subunit alpha	Y65B4BR.5	WBGene00022042
	O01869	18	O01869	-0.0179763	-0.278607	0.242655	33.3707	0.880417	0.942603	mir-1(gk276) / N2	rps-10		Ribosomal Protein, Small subunit	D1007.6	WBGene00004479
	P49632;G8JY83;P0CG71	20;9;9	P49632	-0.0139416	-0.216405	0.188522	32.5675	0.880611	0.942603	mir-1(gk276) / N2	ubq-2	ubib	Ubiquitin-60S ribosomal protein L40	ZK1010.1	WBGene00006728
	Q22469	5	Q22469	-0.0172293	-0.268694	0.234236	25.6171	0.881202	0.942643	mir-1(gk276) / N2			Uncharacterized protein	T13H5.4	WBGene00011758
	Q93315	6	Q93315	0.0189061	-0.259217	0.29703	27.6817	0.882127	0.94304	mir-1(gk276) / N2	cytb-5.1		YTochrome B	C31E10.7	WBGene00007848
	A5Z2X2	2	A5Z2X2	0.019893	-0.275566	0.315352	25.1298	0.883242	0.943639	mir-1(gk276) / N2			Uncharacterized protein	Y57G11C.1147	WBGene00303007
	P47207	35	P47207	0.0115484	-0.161323	0.18442	31.1498	0.884147	0.944014	mir-1(gk276) / N2	cct-2	cctb	T-complex protein 1 subunit beta	T21B10.7	WBGene00000378
	Q9Y0V2;J7SF95	3;2	Q9Y0V2	0.136375	-1.93027	2.20302	25.0247	0.885549	0.944171	mir-1(gk276) / N2	tin-9.2	tim-9b	Mitochondrial import inner membrane translocase subunit Tim10B	B0564.1	WBGene00044083
	P91477	3	P91477	-0.0590355	-0.954282	0.836211	24.4646	0.885626	0.944171	mir-1(gk276) / N2	pbs-4		Proteasome subunit beta type-2	T20F5.2	WBGene00003950
	L8E938;L8EC32;Q23542;E2JKZ0;E2JKY8	7;7;7;7;4	Q23542	0.0132047	-0.188357	0.214767	26.7176	0.886369	0.944171	mir-1(gk276) / N2	dnc-1		DyNactin Complex component	ZK593.5	WBGene00001017
	Q9U2M8	4	Q9U2M8	0.118819	-1.70516	1.9428	25.0852	0.887004	0.944171	mir-1(gk276) / N2			Coiled-coil and C2 domain-containing protein 1-like	Y37H9A.3	WBGene00012578
	Q9U2Z1	5	Q9U2Z1	-0.0227173	-0.371644	0.32621	25.7685	0.887066	0.944171	mir-1(gk276) / N2	sec-23		Yeast SEC homolog	Y113G7A.3	WBGene00004754
	O62055	11	O62055	0.0199708	-0.292334	0.332276	26.7628	0.889063	0.945121	mir-1(gk276) / N2			Uncharacterized protein	C09F9.2	WBGene00007479
	Q65ZI6;Q4TTA5	4;4	Q65ZI6	0.0402127	-0.588671	0.669097	28.1201	0.889069	0.945121	mir-1(gk276) / N2	nspc-1		Nematode Specific Peptide family, group C	C03G5.8	WBGene00023477
	O02115	3	O02115	-0.123225	-2.08325	1.8368	25.2627	0.890918	0.945383	mir-1(gk276) / N2	pcn-1		Proliferating cell nuclear antigen	W03D2.4	WBGene00003955
	O01974	10	O01974	0.0190105	-0.284339	0.32236	28.8225	0.891264	0.945383	mir-1(gk276) / N2	eif-3.H		Eukaryotic translation initiation factor 3 subunit H	C41D11.2	WBGene00001231
	A0A0K3AQT4	60	A0A0K3AQT4	-0.0814789	-1.39162	1.22866	25.4427	0.892086	0.945383	mir-1(gk276) / N2	lev-11		Uncharacterized protein	Y105E8B.1	WBGene00002978
	Q22438	2	Q22438	-0.0848834	-1.45134	1.28157	25.7029	0.89221	0.945383	mir-1(gk276) / N2	mrpl-51		39S ribosomal protein L51, mitochondrial	T12G3.5	WBGene00011740
	Q22562	32	Q22562	-0.0134944	-0.230772	0.203783	31.5168	0.892231	0.945383	mir-1(gk276) / N2			Uncharacterized protein	T19B10.2	WBGene00011831
	Q95QV8;Q8IG50;Q95QV7;Q8IG49;Q95QV6	12;11;10;9;1	Q95QV8	0.0137388	-0.208334	0.235811	28.8665	0.892646	0.945383	mir-1(gk276) / N2	tiar-1		TIA-1/TIAL RNA binding protein homolog	C18A3.5	WBGene00015943
	O45551;D1MN85	7;6	O45551	0.020033	-0.305815	0.345881	28.0349	0.893312	0.945501	mir-1(gk276) / N2	ife-1		Eukaryotic translation initiation factor 4E-1	F53A2.6	WBGene00002059
	G5EES2;G5EBK3	21;21	G5EBK3	-0.0153782	-0.266934	0.236177	29.9792	0.893911	0.945546	mir-1(gk276) / N2	erm-1		ERM-1B	C01G8.5	WBGene00001333
	Q09248	11	Q09248	-0.0238959	-0.421741	0.373949	27.617	0.895753	0.946907	mir-1(gk276) / N2	dnc-2		Probable dynactin subunit 2	C28H8.12	WBGene00001018
	Q9GYJ9	4	Q9GYJ9	-0.0489301	-0.873687	0.775827	24.746	0.897024	0.947473	mir-1(gk276) / N2	snx-1		Sorting NeXin	C05D9.1	WBGene00004927
	Q9U332	13	Q9U332	0.029016	-0.461882	0.519914	32.8275	0.897401	0.947473	mir-1(gk276) / N2	rpl-31		60S ribosomal protein L31	W09C5.6	WBGene00004445
	Q9U1P7	2	Q9U1P7	0.0957461	-1.53849	1.72998	25.2453	0.898298	0.947833	mir-1(gk276) / N2			Uncharacterized protein	Y95D11A.1	WBGene00013605
	Q9XXN2	5	Q9XXN2	-0.0402304	-0.747102	0.666641	25.3866	0.901187	0.950292	mir-1(gk276) / N2	immt-2		MICOS complex subunit MIC60-2	W06H3.1	WBGene00012315
	Q9U2Q8;Q8I4E5	15;2	Q9U2Q8	0.0137404	-0.235274	0.262755	32.1043	0.904181	0.952859	mir-1(gk276) / N2	fkb-2		Peptidylprolyl isomerase	Y18D10A.19	WBGene00001427
	Q65XX4	24	Q65XX4	-0.0164198	-0.319989	0.28715	31.6584	0.906064	0.954252	mir-1(gk276) / N2			Uncharacterized protein	Y47G6A.15	WBGene00021641
	Q19007	9	Q19007	0.00959819	-0.169832	0.189028	30.4704	0.907094	0.954747	mir-1(gk276) / N2	nap-1		Nucleosome Assembly Protein	D2096.8	WBGene00017075
	O17730	5	O17730	-0.0149767	-0.301323	0.27137	26.4349	0.90915	0.95632	mir-1(gk276) / N2	mpst-1		Putative thiosulfate sulfurtransferase mpst-1	D2023.5	WBGene00008409
	Q19618	2	Q19618	0.0751046	-1.3977	1.54791	24.8247	0.911412	0.958108	mir-1(gk276) / N2			Uncharacterized protein	F20B10.3	WBGene00008967
	P91154	4	P91154	-0.0676938	-1.41077	1.27538	24.6385	0.912435	0.958592	mir-1(gk276) / N2			60S ribosome subunit biogenesis protein NIP7 homolog	C43E11.9	WBGene00016607
	Q95XP5;U4PMD6	11;6	Q95XP5	0.0136406	-0.260422	0.287703	27.8735	0.913525	0.959145	mir-1(gk276) / N2	mca-3		Calcium-transporting ATPase	Y67D8C.10	WBGene00003153
	D0IMZ6	75	D0IMZ6	-0.0494182	-1.0582	0.959368	23.6705	0.914882	0.959966	mir-1(gk276) / N2	fln-1		FiLamiN (Actin binding protein) homolog	Y66H1B.2	WBGene00022048
	G5EBV6	4	G5EBV6	0.0217718	-0.426685	0.470228	25.6725	0.915642	0.959966	mir-1(gk276) / N2	pgl-3		Guanyl-specific ribonuclease pgl-3	C18G1.4	WBGene00003994
	Q966C6;Q95XE4;Q8MXR8	43;22;21	Q966C6	-0.00993682	-0.215488	0.195614	34.5054	0.915998	0.959966	mir-1(gk276) / N2	rpl-7A		60S ribosomal protein L7a	Y24D9A.4	WBGene00004419
	Q9U2D6	6	Q9U2D6	-0.0282367	-0.62733	0.570856	27.4398	0.918092	0.96115	mir-1(gk276) / N2	cnp-2		Calcineurin-interacting protein 2	Y46G5A.10	WBGene00012901
	Q9U3L5	4	Q9U3L5	0.0151504	-0.306944	0.337244	25.2426	0.918257	0.96115	mir-1(gk276) / N2			Uncharacterized protein	C47B2.2	WBGene00008131
	O17687	3	O17687	-0.00770354	-0.177252	0.161845	28.9934	0.921029	0.963245	mir-1(gk276) / N2	nasp-2		NASP (Human Nuclear Autoantigenic Sperm Protein) homolog	C50B6.2	WBGene00008218
	Q21418	10	Q21418	-0.0132554	-0.306336	0.279825	26.9384	0.921389	0.963245	mir-1(gk276) / N2			Uncharacterized protein	K10D3.4	WBGene00010738
	Q09475	7	Q09475	0.0114879	-0.251643	0.274618	26.2545	0.924107	0.965494	mir-1(gk276) / N2			Uncharacterized helicase C28H8.3	C28H8.3	WBGene00016194
	P15796	8	P15796	0.0179287	-0.40268	0.438537	27.732	0.925896	0.96677	mir-1(gk276) / N2	hil-2		Histone H1.2	Y73B6BL.9	WBGene00001853
	Q17606	5	Q17606	0.0150503	-0.347615	0.377716	26.7435	0.927849	0.968215	mir-1(gk276) / N2	rpl-24.2		Probable ribosome biogenesis protein RLP24	C03D6.8	WBGene00004437
	Q93185	4	Q93185	-0.0155954	-0.396922	0.365731	25.0244	0.928891	0.968449	mir-1(gk276) / N2			Uncharacterized protein	C02F4.4	WBGene00007264
	Q9U1Q4	20	Q9U1Q4	0.0118584	-0.279409	0.303126	30.1217	0.929211	0.968449	mir-1(gk276) / N2	glp-4	vars-2 vrs-2	Valine--tRNA ligase	Y87G2A.5	WBGene00006936
	Q9BPN9	5	Q9BPN9	0.0202134	-0.501555	0.541982	27.0105	0.932631	0.97142	mir-1(gk276) / N2			Uncharacterized protein	Y92H12BR.2	WBGene00022368
	G5EFP4	6	G5EFP4	0.0209259	-0.534275	0.576127	27.9939	0.934452	0.971546	mir-1(gk276) / N2	sym-1		SYM-1 protein	C44H4.3	WBGene00006366
	G5EEN7	3	G5EEN7	-0.036768	-1.01974	0.946205	24.9944	0.934948	0.971546	mir-1(gk276) / N2			Uncharacterized protein	Y39A1A.3	WBGene00012643
	Q20060	5	Q20060	0.0287446	-0.740833	0.798323	25.0815	0.935041	0.971546	mir-1(gk276) / N2	smc-4		Structural maintenance of chromosomes protein 4	F35G12.8	WBGene00004874
	Q95YE4	1	Q95YE4	-0.0891651	-2.48228	2.30395	27.6302	0.935201	0.971546	mir-1(gk276) / N2	srxa-5		Serpentine Receptor, class XA	C09E7.1	WBGene00015637
	Q22135	10	Q22135	0.00880191	-0.22937	0.246973	29.4525	0.935726	0.971546	mir-1(gk276) / N2	nifk-1		NIFK homolog	T04A8.6	WBGene00011408
	O45106	3	O45106	-0.0148768	-0.420854	0.3911	26.5537	0.936267	0.971546	mir-1(gk276) / N2	ech-5		Enoyl-CoA Hydratase	F56B3.5	WBGene00001154
	G5ED01	3	G5ED01	-0.0491317	-1.40008	1.30182	25.7586	0.936746	0.971546	mir-1(gk276) / N2	inos-1		INOsitol-3-phosphate Synthase	VF13D12L.1	WBGene00012148
	Q9N3F3	3	Q9N3F3	0.00821906	-0.225067	0.241505	26.128	0.938718	0.972654	mir-1(gk276) / N2	mrpl-17		Mitochondrial Ribosomal Protein, Large	Y54E10A.7	WBGene00021829
	H2L005;Q3Y409;H2L003	3;3;3	Q3Y409	-0.0268075	-0.790677	0.737062	24.7355	0.938957	0.972654	mir-1(gk276) / N2	lmd-3		LysM Domain (Peptidoglycan binding) protein	F52E1.13	WBGene00018700
	Q20728	7	Q20728	-0.00883148	-0.264619	0.246956	27.6624	0.939942	0.972775	mir-1(gk276) / N2	tbcb-1		Tubulin-specific chaperone B	F53F4.3	WBGene00009987
	Q22370	11	Q22370	0.00686764	-0.192954	0.206689	28.4236	0.940216	0.972775	mir-1(gk276) / N2	ucr-2.2		Ubiquinol-Cytochrome c oxidoReductase complex	T10B10.2	WBGene00011679
	Q18625	5	Q18625	0.00788318	-0.22926	0.245026	27.4879	0.942171	0.974206	mir-1(gk276) / N2	lec-4		Galectin	C44F1.3	WBGene00002267
	Q19579;Q19581	21;20	Q19579	0.00629994	-0.19066	0.20326	29.8012	0.944353	0.975869	mir-1(gk276) / N2	pab-2		Polyadenylate-binding protein	F18H3.3	WBGene00003903
	P34446	18	P34446	0.00694515	-0.213145	0.227035	28.7248	0.945099	0.976049	mir-1(gk276) / N2	pat-2		Integrin alpha pat-2	F54F2.1	WBGene00003929
	Q23642	5	Q23642	-0.00800328	-0.266504	0.250497	27.9366	0.946134	0.976525	mir-1(gk276) / N2			Uncharacterized protein	ZK856.7	WBGene00014108
	Q23058	5	Q23058	0.0176494	-0.612065	0.647364	27.7357	0.951228	0.980809	mir-1(gk276) / N2	ssp-9; ssp-11		Sperm-specific class P protein 9/11	E03H12.10_T28H11.6	WBGene00006038_WBGene00006040
	Q19459	7	Q19459	0.0168992	-0.588632	0.62243	26.2379	0.951436	0.980809	mir-1(gk276) / N2			Golgi apparatus protein 1 homolog	F14E5.2	WBGene00008800
	A0A0K3AVW5;H2L099;A0A0K3ASW2;A0A0K3ASB9;A0A0K3AY55	5;5;4;4;4	H2L099	-0.0180401	-0.673779	0.637699	25.9953	0.952126	0.980926	mir-1(gk276) / N2	gck-1		Germinal center kinase 1	T19A5.2	WBGene00001526
	G5ED75;Q9XU12	4;4	Q9XU12	-0.036108	-1.3949	1.32268	24.9537	0.953755	0.981385	mir-1(gk276) / N2	klp-7		Kinesin-like protein	K11D9.1	WBGene00002219
	G5EFR0	9	G5EFR0	0.0097005	-0.358575	0.377976	27.0161	0.954161	0.981385	mir-1(gk276) / N2	tag-297		Uncharacterized protein	C38C6.6	WBGene00007999
	O01814	7	O01814	-0.00692377	-0.274374	0.260527	28.5191	0.954947	0.981385	mir-1(gk276) / N2	lbp-5		Fatty acid-binding protein homolog 5	W02D3.7	WBGene00002257
	G5EDV0	39	G5EDV0	-0.00908388	-0.366665	0.348498	31.9861	0.955789	0.981385	mir-1(gk276) / N2			Uncharacterized protein	E01G4.6	WBGene00008448
	O44512	20	O44512	0.00496801	-0.192378	0.202314	30.9736	0.956188	0.981385	mir-1(gk276) / N2	isp-1		Cytochrome b-c1 complex subunit Rieske, mitochondrial	F42G8.12	WBGene00002162
	P53795	5	P53795	0.00852144	-0.330593	0.347636	27.9249	0.956267	0.981385	mir-1(gk276) / N2	hint-1		Histidine triad nucleotide-binding protein 1	F21C3.3	WBGene00009002
	Q19420	4	Q19420	0.0141538	-0.557035	0.585343	25.6663	0.956874	0.981385	mir-1(gk276) / N2	ttx-7		Inositol monophosphatase ttx-7	F13G3.5	WBGene00008765
	Q10667	3	Q10667	0.0686001	-2.75443	2.89163	26.6643	0.957707	0.981385	mir-1(gk276) / N2	rnp-1		RNA-binding protein rnp-1	ZK863.7	WBGene00004384
	Q20927	2	Q20927	-0.00858916	-0.362476	0.345298	25.7646	0.957758	0.981385	mir-1(gk276) / N2	col-156		COLlagen	F57B7.3	WBGene00000729
	Q22633	7	Q22633	0.0110518	-0.468417	0.490521	25.7222	0.95988	0.982522	mir-1(gk276) / N2	hpd-1		4-hydroxyphenylpyruvate dioxygenase	T21C12.2	WBGene00001993
	P27798	31	P27798	0.00490214	-0.208522	0.218326	33.4426	0.960021	0.982522	mir-1(gk276) / N2	crt-1		Calreticulin	Y38A10A.5	WBGene00000802
	Q09489;Q65ZJ7	6;4	Q09489	-0.00894576	-0.420027	0.402135	27.8956	0.962121	0.98408	mir-1(gk276) / N2			Uncharacterized protein	C32D5.8	WBGene00016316
	Q9U3K4;Q9U3K3	10;10	Q9U3K3	0.00568312	-0.267949	0.279316	27.963	0.963847	0.984582	mir-1(gk276) / N2	mlt-9		Uncharacterized protein	F09B12.1	WBGene00008605
	G5ECE7	5	G5ECE7	0.00580997	-0.276761	0.288381	27.7891	0.964209	0.984582	mir-1(gk276) / N2			Uncharacterized protein	C34E7.4	WBGene00007934
	A0A2C9C2Z1;A0A2C9C3A7;Q9N4M4	83;83;83	Q9N4M4	0.00451263	-0.215808	0.224834	32.2996	0.964347	0.984582	mir-1(gk276) / N2	anc-1		Nuclear anchorage protein 1	ZK973.6	WBGene00000140
	G5ECM9	4	G5ECM9	0.00322174	-0.162289	0.168732	28.6542	0.966115	0.985796	mir-1(gk276) / N2	cpi-2		Cystatin	R01B10.1	WBGene00000534
	Q09EE7;Q94392	4;4	Q94392	0.011696	-0.607207	0.630599	24.8168	0.967102	0.986213	mir-1(gk276) / N2	nsf-1		Vesicle-fusing ATPase	H15N14.2	WBGene00003818
	C0Z3L6	5	C0Z3L6	0.00442334	-0.26013	0.268977	26.1585	0.970891	0.988211	mir-1(gk276) / N2			Uncharacterized protein	Y54G11A.17	WBGene00185067
	Q8WTL6	6	Q8WTL6	0.0188552	-1.1208	1.15851	24.3769	0.971197	0.988211	mir-1(gk276) / N2	hpo-29		Uncharacterized protein	Y50D7A.4	WBGene00021754
	G5EE80	7	G5EE80	-0.0070145	-0.445119	0.43109	27.1914	0.972125	0.988211	mir-1(gk276) / N2	SRP54		Signal recognition particle 54 kDa protein	F21D5.7	WBGene00009012
	Q9GYI1	4	Q9GYI1	0.00700687	-0.433241	0.447254	28.3367	0.972291	0.988211	mir-1(gk276) / N2			Uncharacterized protein	F29B9.11	WBGene00017925
	Q94216	7	Q94216	-0.00430518	-0.28076	0.272149	26.2907	0.972888	0.988211	mir-1(gk276) / N2	dnj-11		DNaJ domain (Prokaryotic heat shock protein)	F38A5.13	WBGene00001029
	P46550;G8JY43	21;20	P46550	0.00288911	-0.183358	0.189136	30.5833	0.972993	0.988211	mir-1(gk276) / N2	cct-6		T-complex protein 1 subunit zeta	F01F1.8	WBGene00000381
	Q94246;Q94247	29;26	Q94246	0.00333168	-0.220025	0.226689	32.2623	0.97403	0.988211	mir-1(gk276) / N2	gfi-1		GEI-4 (Four) Interacting protein	F57F4.3	WBGene00001581
	O02323	4	O02323	0.00365907	-0.242345	0.249663	26.7757	0.974104	0.988211	mir-1(gk276) / N2	lbp-7		Fatty acid-binding protein homolog 7	T22G5.2	WBGene00002259
	Q9N2X6	7	Q9N2X6	-0.00564649	-0.395319	0.384026	27.2868	0.974772	0.988211	mir-1(gk276) / N2			Uncharacterized protein	Y75B7AR.1	WBGene00022287
	Q23655	14	Q23655	0.0036596	-0.249833	0.257153	30.4691	0.974865	0.988211	mir-1(gk276) / N2	nlt-1		Non-specific lipid-transfer protein-like 1	ZK892.2	WBGene00003773
	O76555	6	O76555	0.00502479	-0.359165	0.369214	26.2144	0.975978	0.988751	mir-1(gk276) / N2	mlt-10		Uncharacterized protein	C09E8.3	WBGene00015646
	P11141	62	P11141	0.00199839	-0.149774	0.15377	33.6372	0.977075	0.989204	mir-1(gk276) / N2	hsp-6	hsp70f	Heat shock 70 kDa protein F, mitochondrial	C37H5.8	WBGene00002010
	G5ECS9	4	G5ECS9	0.00315472	-0.245969	0.252279	26.405	0.977952	0.989204	mir-1(gk276) / N2	cpt-2		Carnitine Palmitoyl Transferase	R07H5.2	WBGene00011122
	Q9XTU9	8	Q9XTU9	-0.00252533	-0.203922	0.198871	27.9839	0.978168	0.989204	mir-1(gk276) / N2	glrx-5		Glutaredoxin	Y49E10.2	WBGene00013029
	Q18678	19	Q18678	0.00297181	-0.251697	0.257641	29.5214	0.979682	0.989562	mir-1(gk276) / N2	sars-1	srs-2	Probable serine--tRNA ligase, cytoplasmic	C47E12.1	WBGene00005663
	Q9U2A8	16	Q9U2A8	0.00794789	-0.673214	0.68911	32.583	0.979684	0.989562	mir-1(gk276) / N2	rpl-43	rpl-37a	60S ribosomal protein L37a	Y48B6A.2	WBGene00004456
	Q9NEZ5	7	Q9NEZ5	-0.00927757	-0.916346	0.897791	26.2988	0.982191	0.991506	mir-1(gk276) / N2	unc-95		Uncharacterized protein	Y105E8A.6	WBGene00006824
	Q9N585	2	Q9N585	0.00551172	-0.643164	0.654187	25.3098	0.985205	0.993959	mir-1(gk276) / N2	ppw-2		Piwi-like protein	Y110A7A.18	WBGene00004094
	B1V8A0	5	B1V8A0	0.0107649	-1.52365	1.54518	25.9136	0.987784	0.995518	mir-1(gk276) / N2	unc-57		Endophilin-A homolog	T04D1.3	WBGene00006791
	P52814	5	P52814	-0.00333911	-0.484602	0.477924	31.4968	0.987918	0.995518	mir-1(gk276) / N2	rpl-39		60S ribosomal protein L39	C26F1.9	WBGene00004453
	P52821	14	P52821	0.00602822	-1.02148	1.03353	33.1553	0.989784	0.996373	mir-1(gk276) / N2	rps-25		40S ribosomal protein S25	K02B2.5	WBGene00004494
	O02208	2	O02208	-0.00744194	-1.29525	1.28036	24.6321	0.989937	0.996373	mir-1(gk276) / N2			Uncharacterized protein	C01A2.4	WBGene00007216
	P91280	6	P91280	0.00134775	-0.287071	0.289767	26.5827	0.991863	0.997298	mir-1(gk276) / N2			Uncharacterized protein	F27C1.6	WBGene00017855
	Q9U2S6;D3NQB1	4;3	Q9U2S6	-0.000892445	-0.203618	0.201834	26.3267	0.992334	0.997298	mir-1(gk276) / N2	cyn-13		Peptidyl-prolyl cis-trans isomerase E	Y116A8C.34	WBGene00000889
	G5EBH7;H2L0I1	14;2	G5EBH7	-0.00124674	-0.33678	0.334287	29.8941	0.99353	0.997298	mir-1(gk276) / N2	calu-1		CALUmenin (Calcium-binding protein) homolog	M03F4.7	WBGene00019760
	C6KRI9;X5M900;Q22847;X5M5W2	9;9;9;9	Q22847	0.0144019	-3.9833	4.0121	26.1477	0.993727	0.997298	mir-1(gk276) / N2			Uncharacterized protein	T28C6.7	WBGene00012121
	G5EDB1;G5ECB4;G5ECB3	16;15;13	G5EDB1	-0.00135894	-0.392779	0.390061	28.2593	0.993954	0.997298	mir-1(gk276) / N2	srap-1		Serine Rich Adhesion Protein-like	T06D8.1	WBGene00011522
	B5BM32;Q9XVS7	2;2	Q9XVS7	-0.00460091	-1.50627	1.49707	24.7598	0.994665	0.997298	mir-1(gk276) / N2	nxf-1		Nuclear RNA export factor 1	C15H11.3	WBGene00003834
	Q8ITY4	3	Q8ITY4	-0.00551218	-1.90821	1.89719	25.9669	0.994955	0.997298	mir-1(gk276) / N2			Splicing factor 3B subunit 6-like protein	C50D2.5	WBGene00016808
	Q09359	4	Q09359	0.00578066	-2.4325	2.44406	25.8869	0.995872	0.997629	mir-1(gk276) / N2			Uncharacterized protein ZK1307.1	ZK1307.1	WBGene00014244
	Q21742	5	Q21742	-0.00046074	-0.27039	0.269468	28.0043	0.997028	0.9982	mir-1(gk276) / N2			Uncharacterized protein	R05F9.6	WBGene00019890
	G5EG62	6	G5EG62	-0.000282257	-0.218693	0.218128	25.9811	0.99775	0.998336	mir-1(gk276) / N2	unc-45		UNC-45	F30H5.1	WBGene00006781
	Q9BKU4	14	Q9BKU4	6.30039e-05	-0.147692	0.147818	31.5046	0.999257	0.999257	mir-1(gk276) / N2	phb-1		Mitochondrial prohibitin complex protein 1	Y37E3.9	WBGene00004014

## Sheet: 1g microscopy data
	Supplemental file 1g: Microscopy data.
	Experiment	Tissue	Age	Temperature [°C]	Genotype	Mean	SEM	p valueA	Number of worms	Figure	Experiment name
		Isthmus	late L4	25	vha-13(syb586[flag::mNeonGreen::vha-13]) V	26.55	0.7236		22		IS_1
	mNeonGreen::VHA-13 intensity				mir-1(gk276) I; vha-13(syb586[flag::mNeonGreen::vha-13]) V	52.06	1.362	<0.0001	14
		Isthmus	late L4	25	vha-13(syb586[flag::mNeonGreen::vha-13]) V	20.19	0.6178		18		IS_2
					mir-1(gk276) I; vha-13(syb586[flag::mNeonGreen::vha-13]) V	37.95	1.2	<0.0001	18
		Isthmus	late L4	25	vha-13(syb586[flag::mNeonGreen::vha-13]) V	14.5	0.8415		23		IS_3
					mir-1(gk276) I; vha-13(syb586[flag::mNeonGreen::vha-13]) V	28.85	1.027	<0.0001	21
		Isthmus	late L4	25	vha-13(syb586[flag::mNeonGreen::vha-13]) V	21.9	0.4274		24		IS_4
					mir-1(gk276) I; vha-13(syb586[flag::mNeonGreen::vha-13]) V	35.32	0.9272	<0.0001	23
		Isthmus	late L4	25	vha-13(syb586[flag::mNeonGreen::vha-13]) V	17.68	0.3551		22		IS_5
					mir-1(gk276) I; vha-13(syb586[flag::mNeonGreen::vha-13]) V	30.45	1.094	<0.0001	23
	mNeonGreen::VHA-13 intensity	Isthmus	late L4	25	vha-13(syb586[flag::mNeonGreen::vha-13]) V	20.22	2.039		110(5)	3D	IS_1_2_3_4_5
	n=5				mir-1(gk276) I; vha-13(syb586[flag::mNeonGreen::vha-13]) V	36.93	4.122	0.0067	99(5)
		Isthmus	late L4	25	vha-13(syb586[flag::mNeonGreen::vha-13]) V	23.41	0.9394		8		IS_6
	mNeonGreen::VHA-13 intensity				vha-13(syb586[flag::mNeonGreen::vha-13]) V; dhEx965[mir-1p::mir-1, myo-2p::mCherry]	19.36	1.329	0.0282	9
		Isthmus	late L4	25	vha-13(syb586[flag::mNeonGreen::vha-13]) V	21.94	0.5278		8		IS_7
					vha-13(syb586[flag::mNeonGreen::vha-13]) V; dhEx965[mir-1p::mir-1, myo-2p::mCherry]	19.03	0.8843	0.0133	8
		Isthmus	late L4	25	vha-13(syb586[flag::mNeonGreen::vha-13]) V	22.49	0.6184		14		IS_8
					vha-13(syb586[flag::mNeonGreen::vha-13]) V; dhEx965[mir-1p::mir-1, myo-2p::mCherry]	17.57	0.7564	<0.0001	9
		Isthmus	late L4	25	vha-13(syb586[flag::mNeonGreen::vha-13]) V	24.25	0.6848		18		IS_9
					vha-13(syb586[flag::mNeonGreen::vha-13]) V; dhEx965[mir-1p::mir-1, myo-2p::mCherry]	19.57	0.6426	<0.0001	14
	mNeonGreen::VHA-13 intensity	Isthmus	late L4	25	vha-13(syb586[flag::mNeonGreen::vha-13]) V	23.02	0.5093		48(4)	3E	IS_6_7_8_9
	n=3				vha-13(syb586[flag::mNeonGreen::vha-13]) V; dhEx965[mir-1p::mir-1, myo-2p::mCherry]	18.88	0.4514	0.0009	40(4)
		Isthmus	late L4	25	vha-13 wt B (1)	14.5	0.8415		23	3G	IS_3
	mNeonGreen::VHA-13 intensity				vha-13 MUT2 C (2)	20.23	0.5062	<0.0001	23
					mir-1(gk276); vha-13 MUT2 C (3)	20.9	1.271	<0.0001; (2) vs. (3) 0.8625	11
		Isthmus	late L4	25	vha-13 wt B (1)	21.9	0.3277		24		IS_4
					vha-13 MUT2 C (2)	23.31	0.3778	0.0238	22
					mir-1(gk276); vha-13 MUT2 C (3)	20.79	0.452	0.1114; (2) vs. (3) <0.0001	19
		Isthmus	late L4	25	vha-13 wt B (1)	17.68	0.3551		22		IS_5
					vha-13 MUT2 C (2)	19.55	0.3409	0.0059	27
					mir-1(gk276); vha-13 MUT2 C (3)	23.41	0.6353	<0.0001; (2) vs. (3) <0.0001	18
		Isthmus	late L4	25	vha-13 wt B (1)	26.55	0.7236		22	3-fs1E	IS_1
	mNeonGreen::VHA-13 intensity				mir-1(gk276); vha-13 wt B (2)	52.06	1.362	<0.0001	14
					vha-13 MUT1 D (3)	26.5	0.9901	0.9929	11
					mir-1(gk276); vha-13 MUT1 D (4)	42.67	1.915	(2) vs. (4) <0.0001, (3) vs. (4) <0.0001	15
		Isthmus	late L4	25	vha-13 wt B (1)	20.19	0.6178		18		IS_2
					mir-1(gk276); vha-13 wt B (2)	37.95	1.2	<0.0001	18
					vha-13 MUT1 D (3)	19.04	0.5802	<0.0001	21
					mir-1(gk276); vha-13 MUT1 D (4)	32.76	1.259	(2) vs. (4) 0.0017, (3) vs. (4) <0.0001	19
		Isthmus	late L4	25	vha-5(syb1093[flag::mNeonGreen::vha-5]) IV	7.278	0.4188		20	3-fs1A	IS_10
	mNeonGreen::VHA-5 intensity				mir-1(gk276) I; vha-5(syb1093[flag::mNeonGreen::vha-5]) IV	10.68	0.5164	<0.0001	18
		Isthmus	late L4	25	vha-5(syb1093[flag::mNeonGreen::vha-5]) IV	6.728	0.2979		20		IS_11
					mir-1(gk276) I; vha-5(syb1093[flag::mNeonGreen::vha-5]) IV	7.79	0.4104	0.0618	24
		Isthmus	late L4	25	vha-5(syb1093[flag::mNeonGreen::vha-5]) IV	11.86	0.7915		21		IS_12
					mir-1(gk276) I; vha-5(syb1093[flag::mNeonGreen::vha-5]) IV	20.9	0.986	<0.0001	24
		Vulva	late L4	25	vha-5(syb1093[flag::mNeonGreen::vha-5]) IV	8.389	0.6621		16		IS_13
	mNeonGreen::VHA-5 intensity				mir-1(gk276) I; vha-5(syb1093[flag::mNeonGreen::vha-5]) IV	9.375	0.7529	0.3354	17
		Vulva	late L4	25	vha-5(syb1093[flag::mNeonGreen::vha-5]) IV	9.222	0.8084		16		IS_14
					mir-1(gk276) I; vha-5(syb1093[flag::mNeonGreen::vha-5]) IV	7.494	0.6328	0.1028	16
		Vulva	late L4	25	vha-5(syb1093[flag::mNeonGreen::vha-5]) IV	10.98	0.8788		18		IS_15
					mir-1(gk276) I; vha-5(syb1093[flag::mNeonGreen::vha-5]) IV	14.37	1.1	0.0207	16
	mNeonGreen::VHA-13 intensity	Vulva	late L4	25	vha-5(syb1093[flag::mNeonGreen::vha-5]) IV	9.53	0.7637		50(3)	3-fs1B	IS_13_14_15
	n=3				mir-1(gk276) I; vha-5(syb1093[flag::mNeonGreen::vha-5]) IV	10.41	2.052	0.7074	49(3)
		Hypodermis	day 4 adult	25	hlh-30(syb809[hlh-30::mNeonGreen]) IV	4.92	0.48		7	4AB	RL_1
	HLH-30::mNeonGreen nuclear localization				mir-1(gk276) I; hlh-30(syb809[hlh-30::mNeonGreen]) IV	9.17	1.66	0.0227	7
		Hypodermis	day 4 adult	25	hlh-30(syb809[hlh-30::mNeonGreen]) IV	4.16	0.15		20		RL_2
					mir-1(gk276) I; hlh-30(syb809[hlh-30::mNeonGreen]) IV	5.61	0.71	0.0297	21
		Hypodermis	day 4 adult	25	hlh-30(syb809[hlh-30::mNeonGreen]) IV	4.31	0.34		19		RL_3
					mir-1(gk276) I; hlh-30(syb809[hlh-30::mNeonGreen]) IV	9.45	0.6	<0.0001	18
		Intestine	day 4 adult	25	N2	2.81	0.25		9	4EF	RL_1
	LysoTracker positive puncta				mir-1(gk276)	4.54	0.57	0.0139	9
		Intestine	day 4 adult	25	N2	6.83	0.64		11		RL_2
					mir-1(gk276)	10.26	1.36	0.0338	11
		Intestine	day 4 adult	25	N2	8.46	0.93		10		RL_3
					mir-1(gk276)	16.7	1.83	0.0012	12
		Pharynx	late L4	25	hlh-30(syb809[hlh-30::mNeonGreen]) IV	16.39	0.53		15	4-fs1AB	RL_4
	HLH-30::mNeonGreen intensity				mir-1(gk276) I; hlh-30(syb809[hlh-30::mNeonGreen]) IV	15.91	0.46	0.5065	15
		Pharynx	late L4	25	hlh-30(syb809[hlh-30::mNeonGreen]) IV	23.94	1.07		15		RL_5
					mir-1(gk276) I; hlh-30(syb809[hlh-30::mNeonGreen]) IV	24.54	0.93	0.6783	14
		Pharynx	day 4 adult	25	hlh-30(syb809[hlh-30::mNeonGreen]) IV	11.45	0.76		15	4-fs1AB	RL_6
					mir-1(gk276) I; hlh-30(syb809[hlh-30::mNeonGreen]) IV	12.23	0.97	0.5329	15
	A p value determined by t-test or One-way ANOVA.
	B vha-13 wt is strain vha-13(syb586[flag::mNeonGreen::vha-13]) V.
	C vha-13 MUT2 is strain vha-13(syb2180, syb587, syb504[flag::mNeonGreen::vha-13 miR-1 BS1,2 mutated]) V.
	D vha-13 MUT1 is strain vha-13(syb587, syb504[flag::mNeonGreen::vha-13 miR-1 BS1 mutated]) V.
	fs: figure supplement

## Sheet: 1h primers
	Supplemental file 1h: Primers.
	Name	Sequence	Purpose
	ama-1 fwd	GGATGGAATGTGGGTTGAGA	ama-1 qPCR
	ama-1 rvs	CGGATTCTTGAATTTCGCGC
	cdc-42 fwd	CTGCTGGACAGGAAGATTACG	cdc-42 qPCR
	cdc-42 rvs	CTCGGACATTCTCGAATGAAG
	vha-5 fwd	GCTCTTTCTCTTGCTCACGCTCA	vha-5 qPCR
	vha-5 rvs	TCCGGTAACGAACACCATGTGC
	vha-10 fwd	TGGCTGGAAACAAGCAAGCTGTC	vha-10 qPCR
	vha-10 rvs	CTCGGCTTGATGTCGCAAACG
	vha-13 fwd	AAGCTCTTCGTGAGATTTCTGGA	vha-13 qPCR
	vha-13 rvs	ACGGATCCTTCACGTTCTGGAG
	vha-19 fwd	AACAAGGCTTCGGCCAGTAATC	vha-19 qPCR
	vha-19 rvs	GTCAACGGAGGCACTCTTATATG
	daf-16 fwd	ATCAGACATCGTTTCCTTCGG	daf-16 qPCR
	daf-16 rvs	TTAACCGTTTCTCTGGACTAGC
	hlh-30 fwd	CTCATCGGCCGGCGCTCATC	hlh-30 qPCR
	hlh-30 rvs	AGAACGCGATGCGTGGTGGG
	gk276_fwd	CCGCATCGCGAAAAGTCATC	Genotyping the mir-1 locus gk276 and dh1111
	gk276_rvs	CCAAATCTTTCACGAGTCGT
	vha-13 fwd	GGTGTGGTACCATGGCCGCAGAATGTTCGTA	vha-13 cDNA
	vha-13 rvs	ACCACCGGTACCTCCTCGAGGTTTCTGAAAGCGTTA
	vha-13U fwd	GGTGGTGCGGCCGCATTTTAAAATTGATTCTCTTG	vha-13 3'UTR
	vha-13U rvs	CACCGCCCGTACGGCGAAGTTTAGAAATCTACAAAAG
	celmir1 fwd2	CTAGCTAGCTAAGAGAAGAGAGTGTAAGCTGA	mir-1 gene
	celmir1 rvs2	CTAGCCGGCTTGAAATGGTTTTCTGCCTC
	m1p fwd	GGGGACAAGTTTGTACAAAAAAGCAGGCTTGATGACATCTGCAAGAAAC	mir-1 promoter
	m1p rvs	GGGGACCACTTTGTACAAGAAAGCTGGGTGAATATAGCGTAGATATAGAG
